# Supplementary material for: Increasing the versatility of the biphenyl-fused-dioxacyclodecyne class of strained alkynes
Source: Royal Society of Chemistry journal article supplement (doi:10.1039/d3ob01712e), 2023-12-13
Supplement: d3ob01712e1.pdf [file d3ob01712e1.pdf]

## Supporting information

Increasing the versatility of the biphenyl-fused-dioxacyclodecyne class of strained alkynes.

Sam Forshaw,<sup>a</sup> Jeremy S. Parker,<sup>b</sup> William T. Scott,<sup>a,c</sup> Richard C. Knighton,<sup>a,d</sup> Neelam Tiwari,<sup>a</sup> Samson M. Oladeji,<sup>a</sup> Andrew C. Stevens,<sup>a</sup> Yean Ming Chew,<sup>c</sup> Jami Reber,<sup>a</sup> Guy J. Clarkson,<sup>a</sup> Mohan K. Balasubramanian<sup>c</sup> and Martin Wills<sup>a\*</sup>

a. Department of Chemistry, The University of Warwick, Coventry, CV4 7AL, UK.

b. Early Chemical Development, Pharmaceutical Sciences, IMED Biotech Unit, AstraZeneca, Macclesfield, SK10 2NA, UK.

c. Warwick Medical School, The University of Warwick, Coventry, CV4 7AL, UK.

d. School of Chemistry, University of Southampton, SO17 1BJ, UK.

|                                                         |             |
|---------------------------------------------------------|-------------|
| Summary of second order rate constants with benzylazide | <b>S2</b>   |
| Procedure for kinetic measurements                      | <b>S3</b>   |
| Cycloaddition rate graphs                               | <b>S4</b>   |
| NMR Spectra                                             | <b>S20</b>  |
| X-ray crystal data                                      | <b>S95</b>  |
| Studies of binding to azide-functionalised proteins     | <b>S106</b> |
| Excel spreadsheets for kinetic runs                     | <b>S126</b> |

## Summary of second order rate constants with benzylazide.

Cycloadditions were carried out in  $\text{CDCl}_3$  unless otherwise stated.

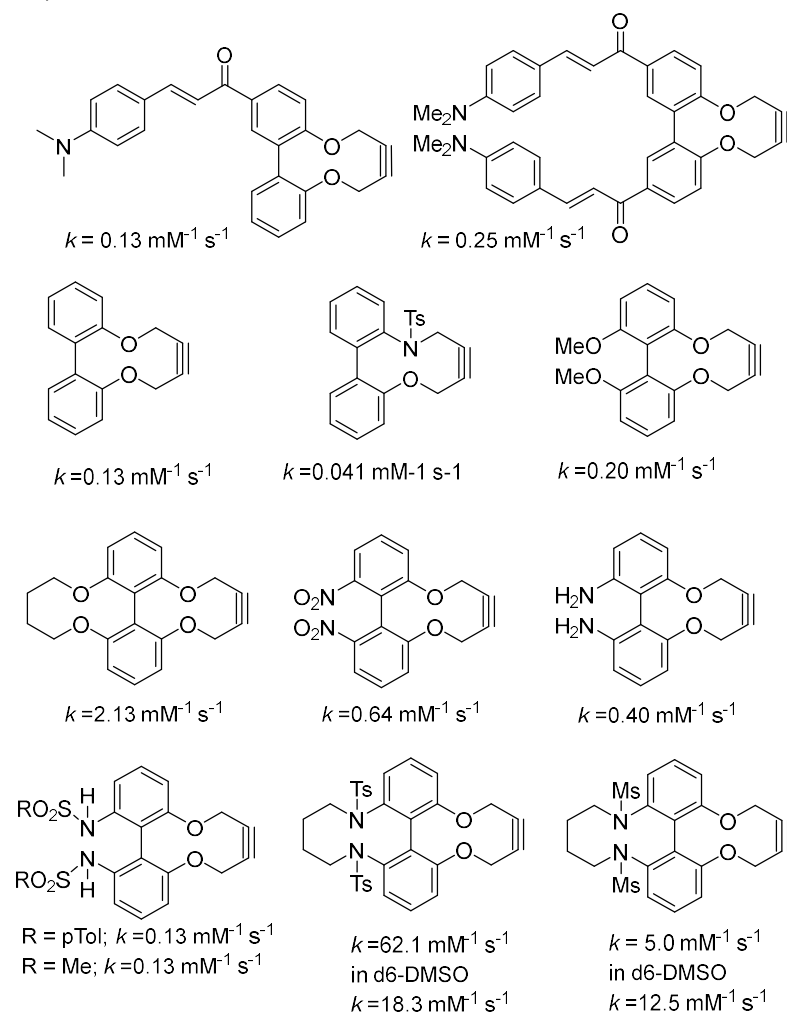

**Figure S1.** Summary of second order rate constants ( $k$ ) with benzylazide at rt, in  $\text{CDCl}_3$  (unless otherwise stated), for compounds reported in this paper. Full details of kinetic runs following conversion over time and derivation of second order rate constants are given in the accompanying excel spreadsheets at the end of this Supporting Information.

### **Procedure for kinetic measurements.**

A sample of the alkyne (typically 5-15 mg) was dissolved in  $\text{CDCl}_3$  (0.5 mL) to give the initial solution of known concentration which was calculated for each run. The  $^1\text{H}$  NMR spectrum was recorded at room temperature (ca. 20 °C). Benzylazide (1.0 equivalent) was then added using a microsyringe and  $^1\text{H}$  NMR spectra were recorded at intervals until no further conversion was noted. The conversion was calculated by integrating well-separated peaks in the starting material and product and correcting for the number of protons giving rise to each peak. The data are summarised in the pdfs of the excel pages used to calculate the second order rate constants in each case. These are located at the end of this Supporting Information. Reactions of compounds **54** and **56** were also recorded in  $d_6$ -DMSO following the procedure above. The use of  $^1\text{H}$  NMR allowed the ratio of  $\text{BnN}_3$  to the alkene at the start and throughout to be confirmed and this was within ca 10% of a 1:1 ratio in each case. An error of ca. 10% can be associated with the measurements. Reactions of compounds **54** and **56** with  $\text{PhN}_3$  (using a 0.5 M solution in  $t\text{BuOMe}$ ) were also recorded in  $\text{CDCl}_3$  following the procedure above, however the ratio of reagents could not be confirmed and a rate constant could not be generated for these reactions.

**Kinetic analysis of cycloadditions (see the excel files for full details):**

Monochalcone **16** (SF688), conversion vs time:

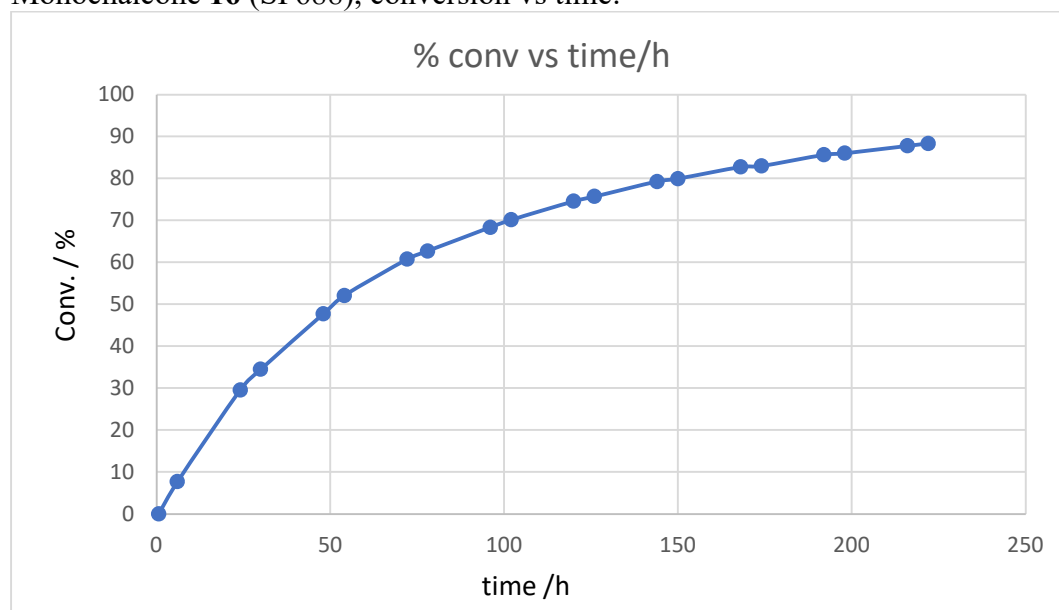

Second order rate graph:

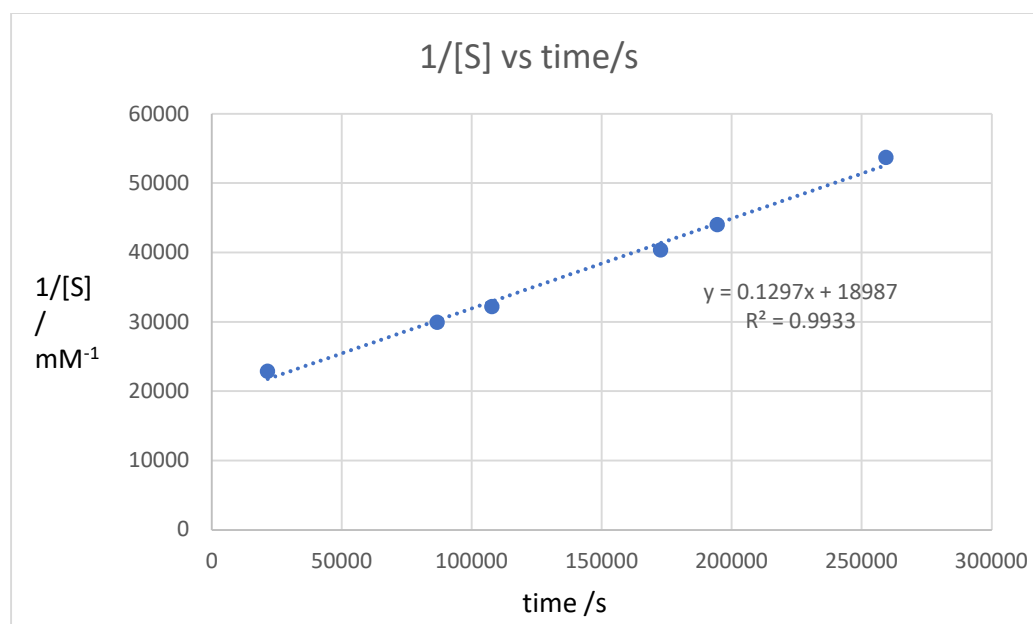

[alkyne] initial = 47 mM, CDCl<sub>3</sub>.

$$k = 0.13 \text{ mM}^{-1} \text{ s}^{-1}.$$



Dichalcone **22** (SF689), conversion vs time:

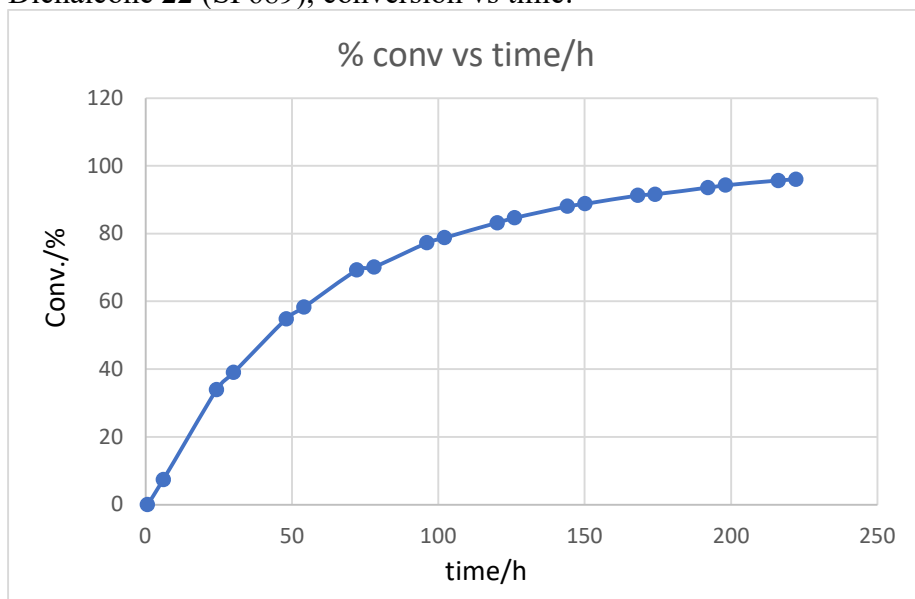

Second order rate graph:

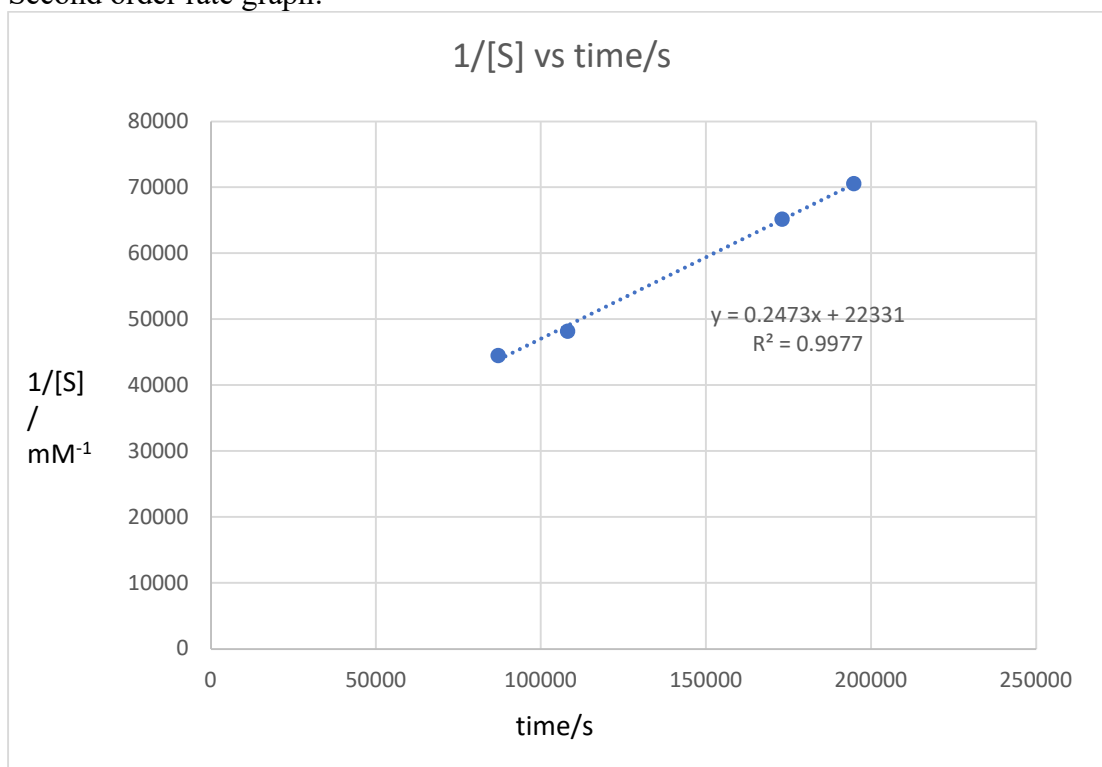

[alkyne] initial = 34 mM, CDCl<sub>3</sub>.

$k = 0.25 \text{ mM}^{-1} \text{ s}^{-1}$ .

NTs/O alkyne **29** (SF379), conversion vs time:

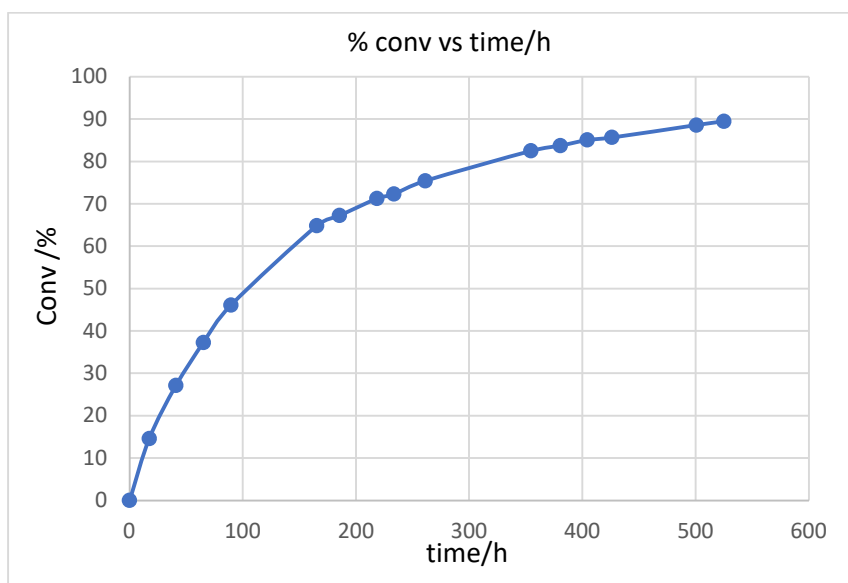

Second order rate graph:

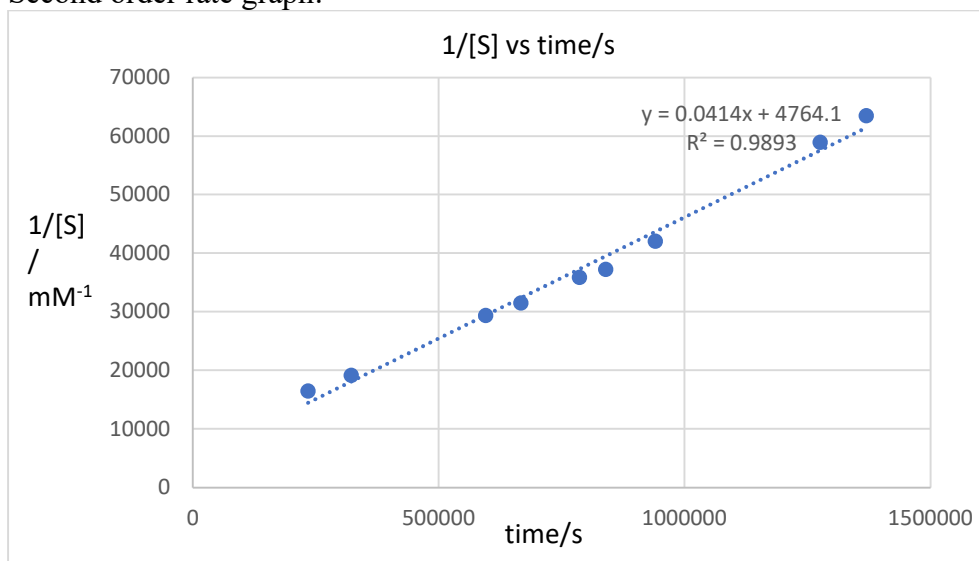

[alkyne] initial = 97 mM, CDCl<sub>3</sub>.

$$k = 0.041 \text{ mM}^{-1} \text{ s}^{-1}.$$

Dimethoxy **37** (SFAZ46), conversion vs time:

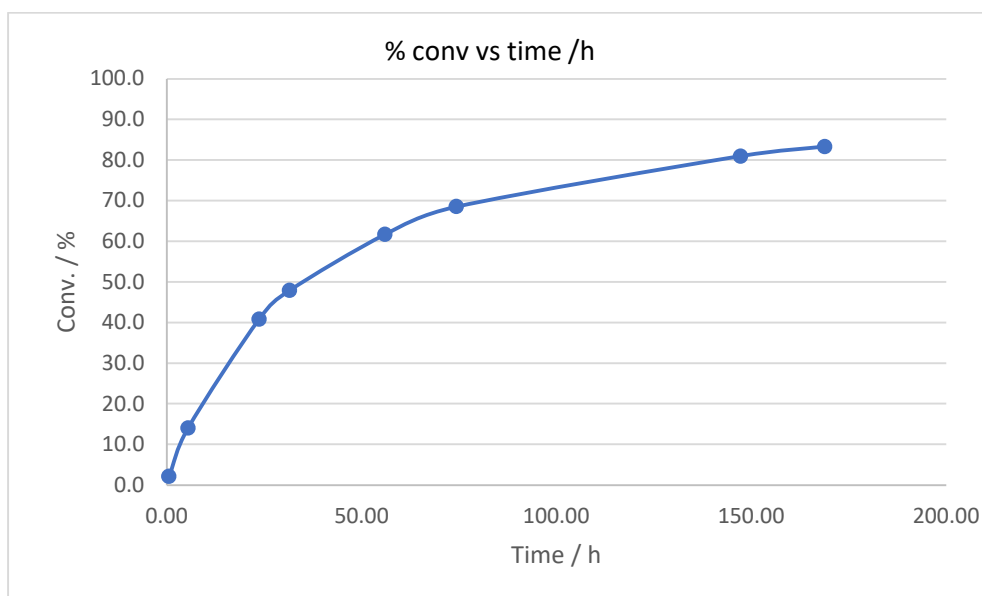

Second order rate graph:

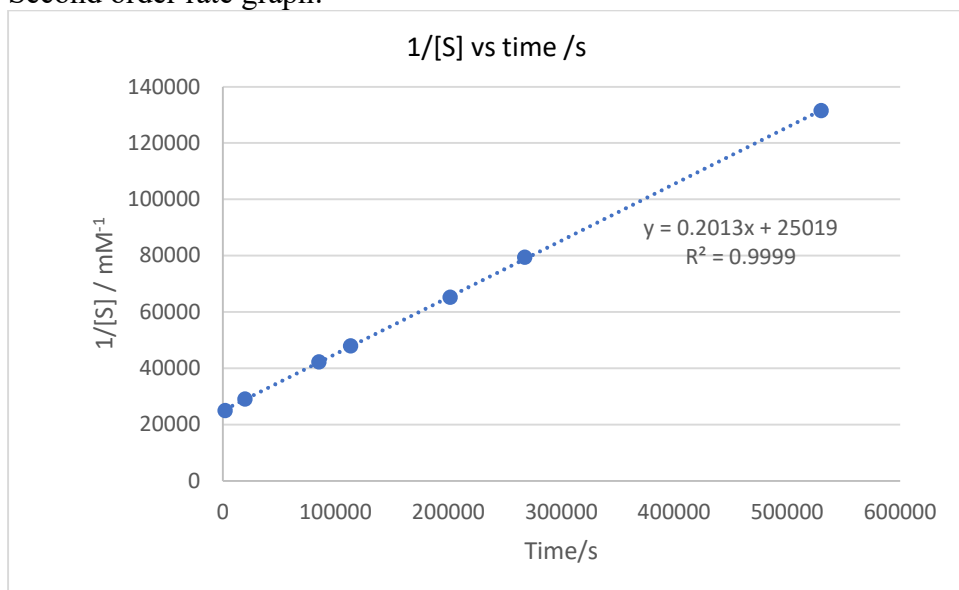

[alkyne] initial = 40 mM,  $\text{CDCl}_3$ .

$$k = 0.20 \text{ mM}^{-1} \text{ s}^{-1}.$$

C4 diether bridged **44** (SF675), conversion vs time:  
 Compared to **37** (SFAZ46, shown on previous page) to illustrate the effect of the 4C  
 bridge on the reactivity, compared to two methoxy groups.

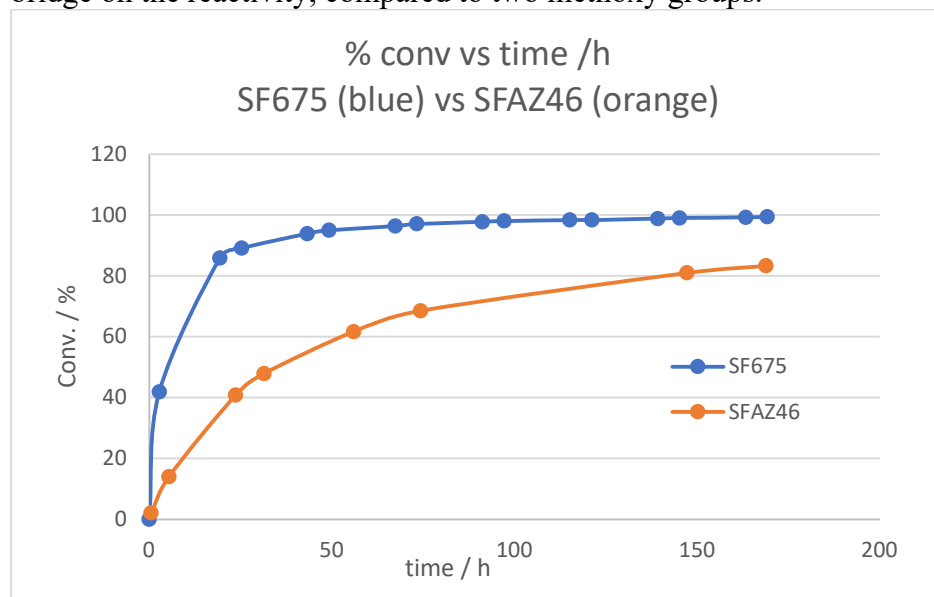

Second order rate graph (vs SFAZ46):

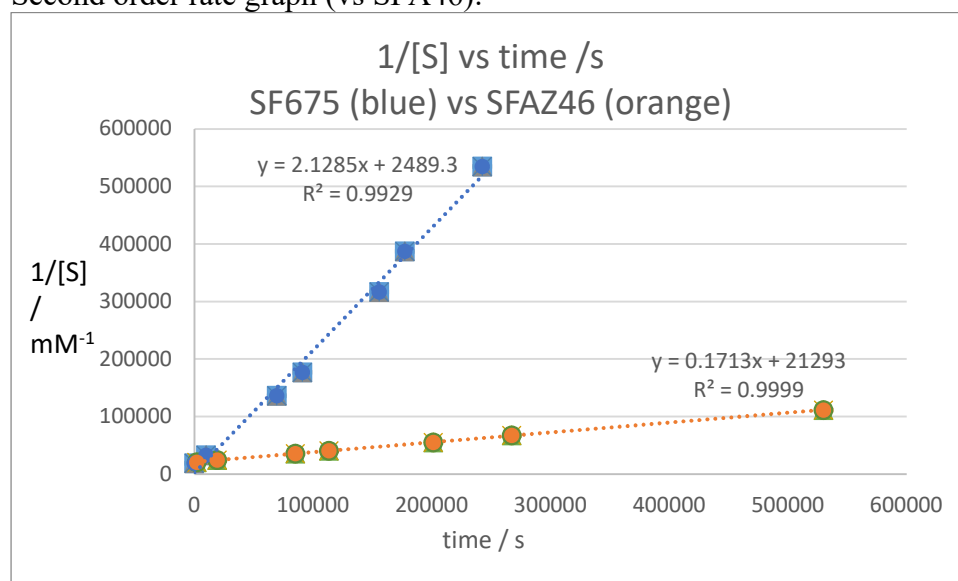

[alkyne] initial = 52 mM, CDCl<sub>3</sub>.

$$k = 2.13 \text{ mM}^{-1} \text{ s}^{-1}.$$

Di NO2 **49** (SF720), conversion vs time:

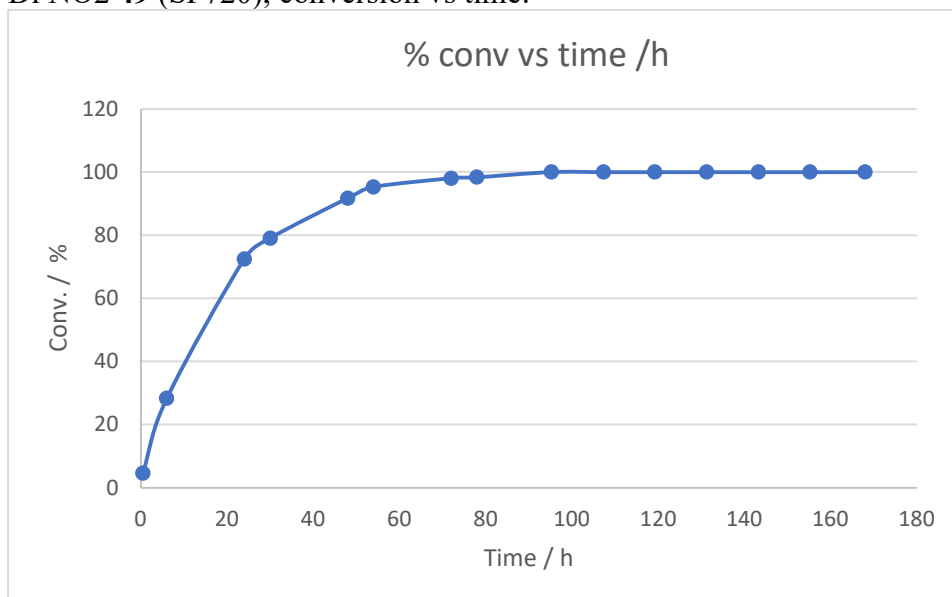

Second order rate graph:

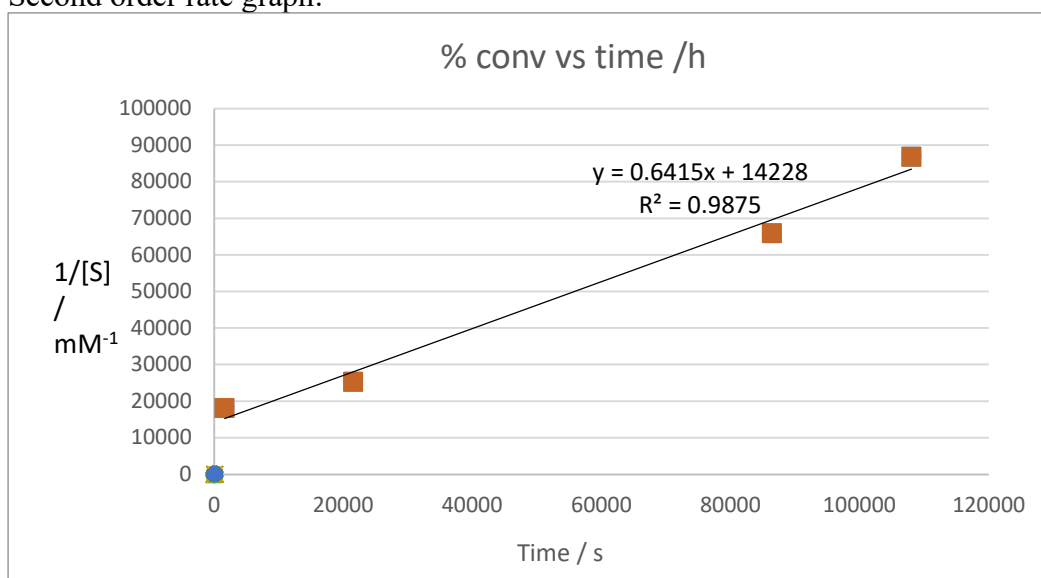

[alkyne] initial = 55 mM, CDCl<sub>3</sub>.

$k = 0.64 \text{ mM}^{-1} \text{ s}^{-1}$ .

Di NH2 **50** (SF 752), conversion vs time:

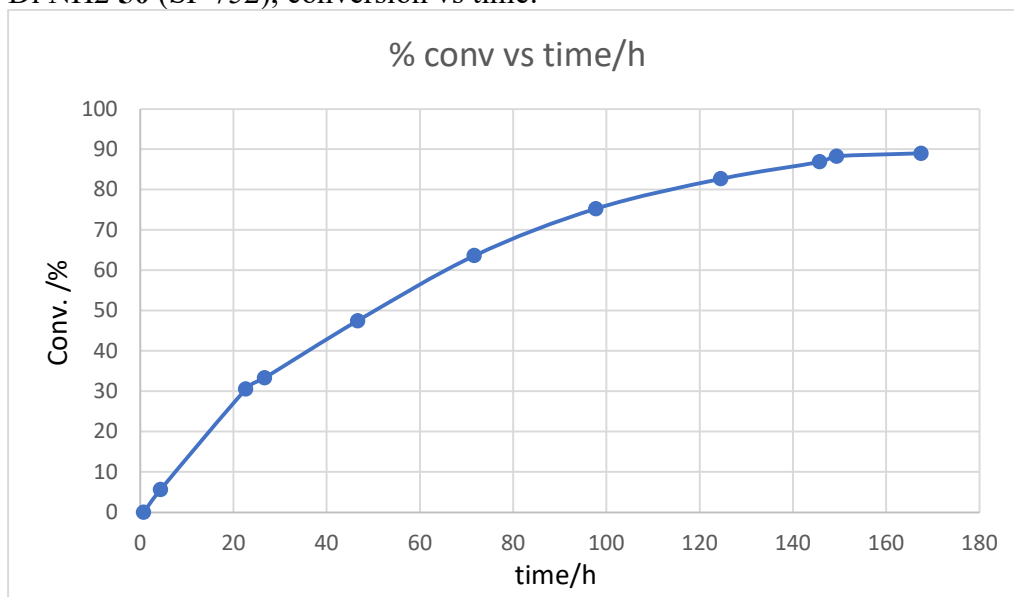

**Second order rate graph:**

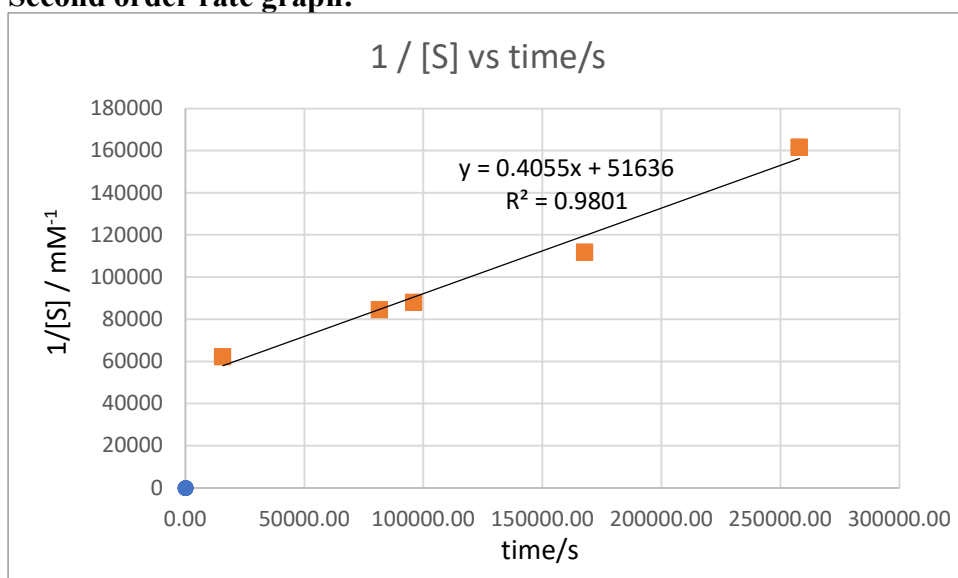

[alkyne] initial = 17 mM, CDCl<sub>3</sub>.

$k = 0.40 \text{ mM}^{-1} \text{ s}^{-1}$ .

Di NTs non C4 **51** (SF756), conversion vs time:

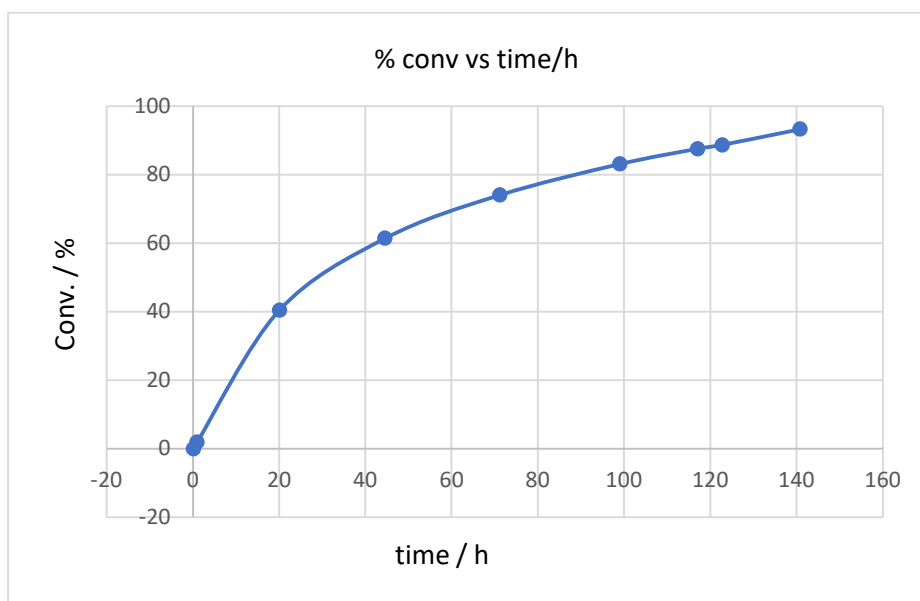

Second order rate graph:

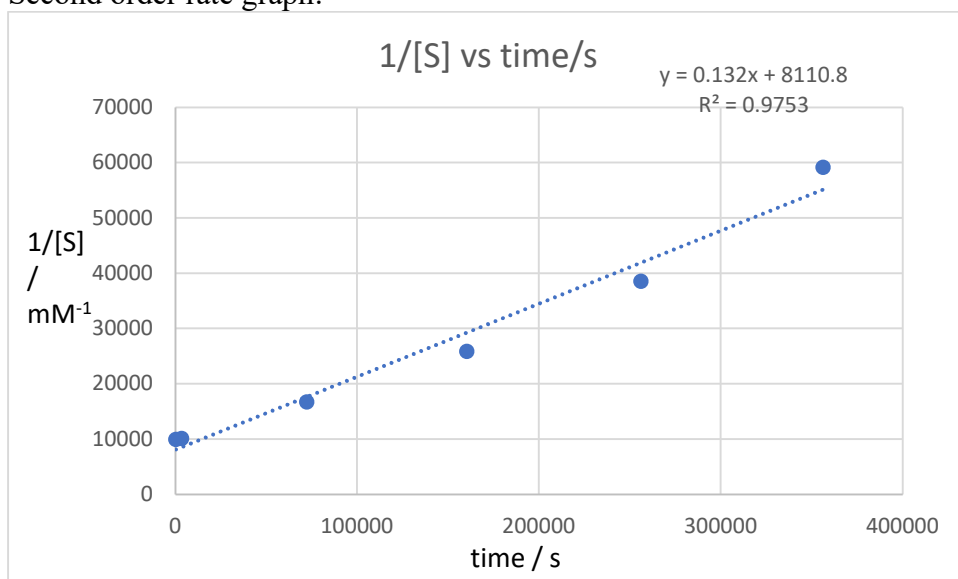

[alkyne] initial = 100 mM, CDCl<sub>3</sub>.

$$k = 0.13 \text{ mM}^{-1} \text{ s}^{-1}.$$

Di Ms non C4 53 (AS12), conversion vs time:

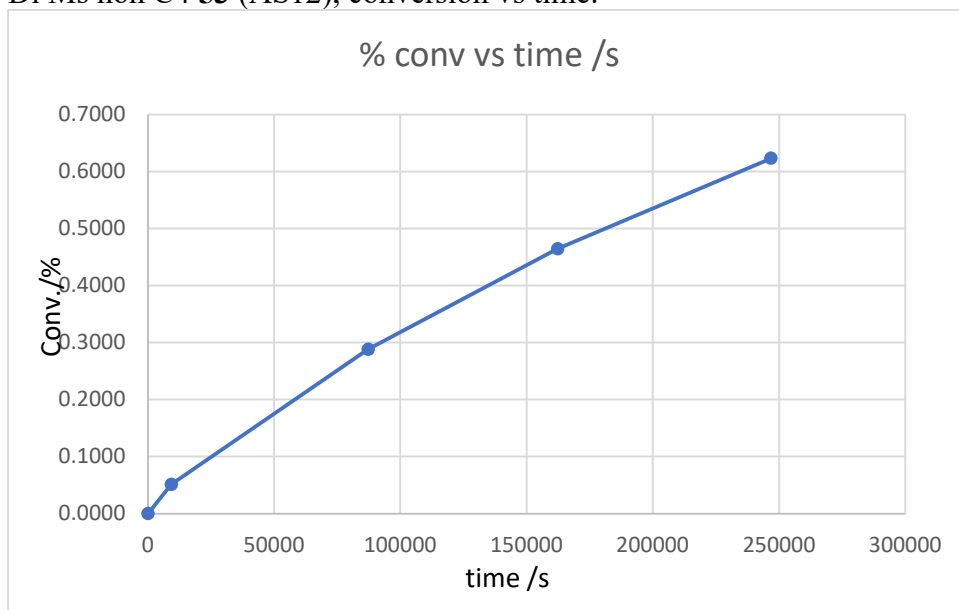

Second order rate graph:

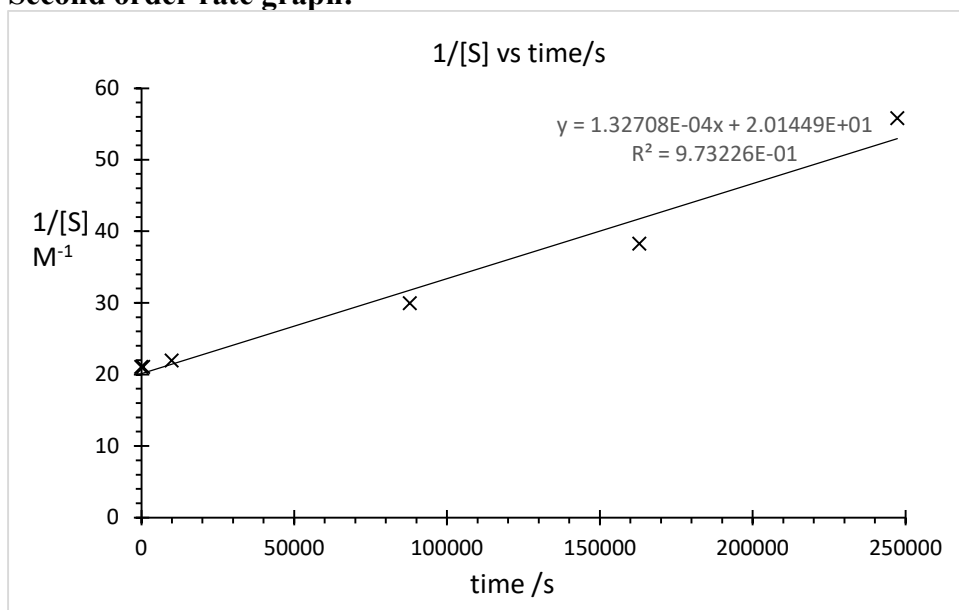

[alkyne] initial = 47 mM, CDCl<sub>3</sub>.

$k = 0.13 \text{ mM}^{-1} \text{ s}^{-1}$ .



DiNTs C4 **54** (SF761), conversion vs time:

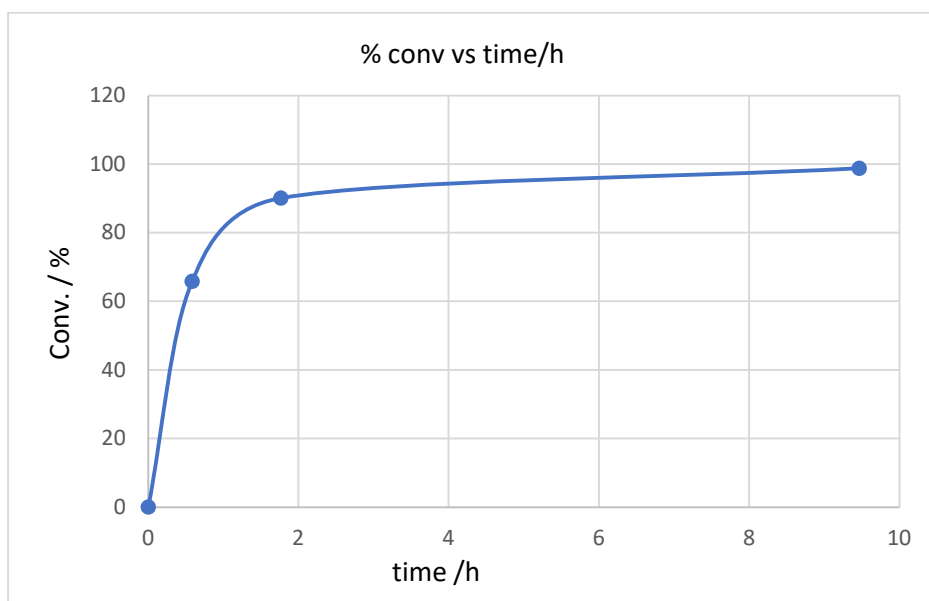

Second order rate graph:

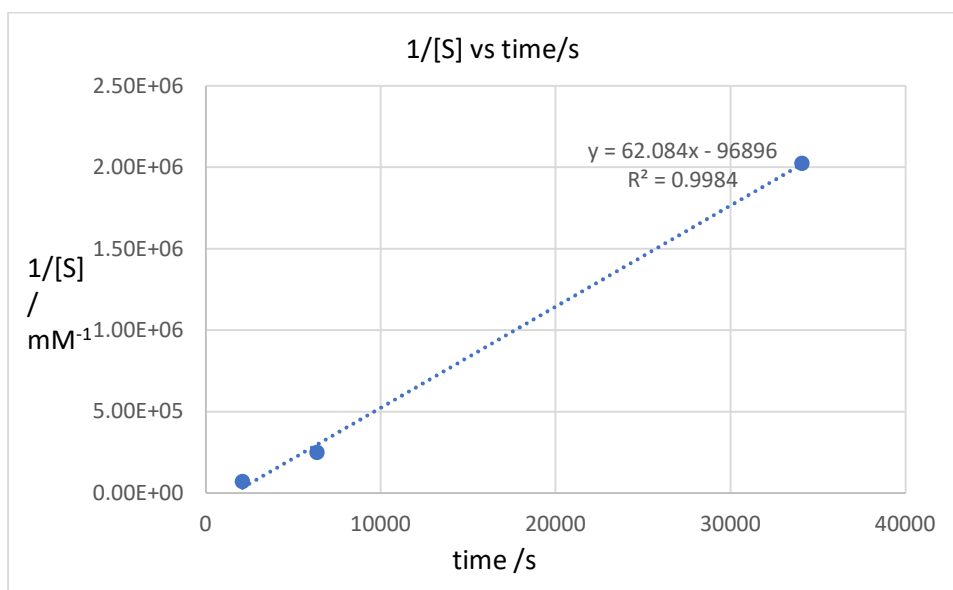

[alkyne] initial = 40 mM, CDCl<sub>3</sub>.

$$k = 62.1 \text{ mM}^{-1} \text{ s}^{-1}.$$

DiNTs C4 (SF761), Repeat on a 1.2 mg scale available (SF763), conversion vs time:

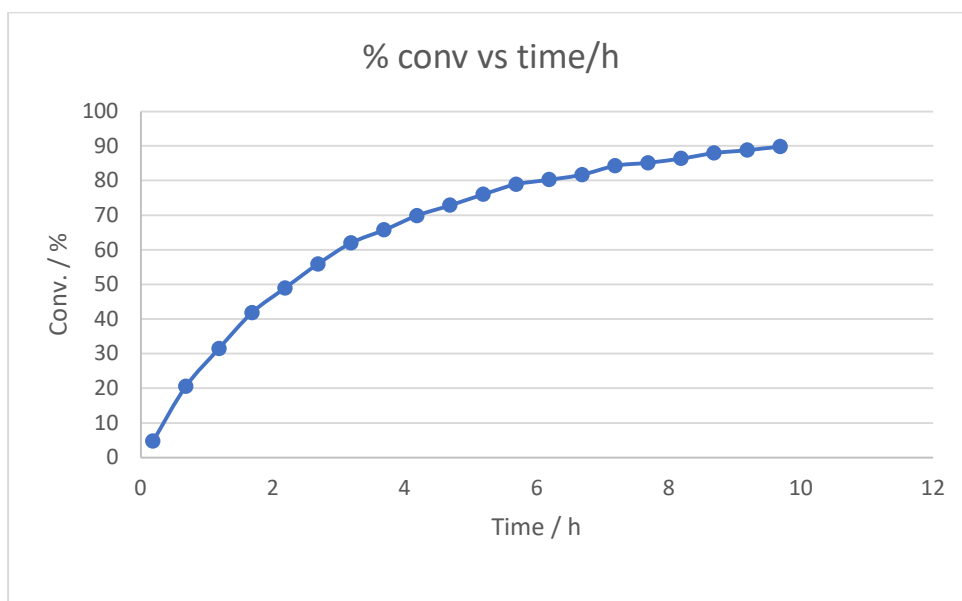

Second order rate graph:

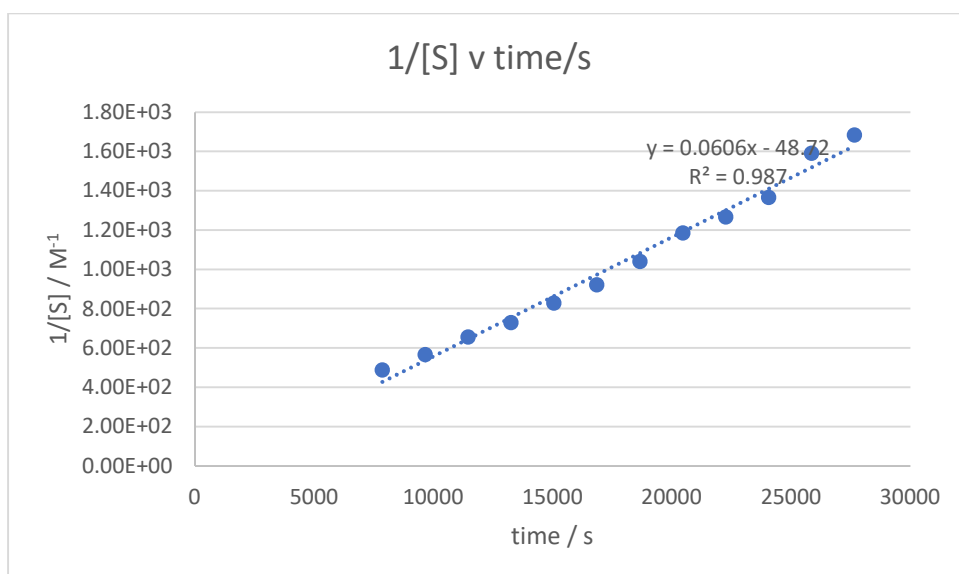

[alkyne] initial = 4 mM, CDCl<sub>3</sub>.

$$k = 60 \text{ mM}^{-1} \text{ s}^{-1}.$$

diMs, C4 56 (AS36). Conversion vs time:

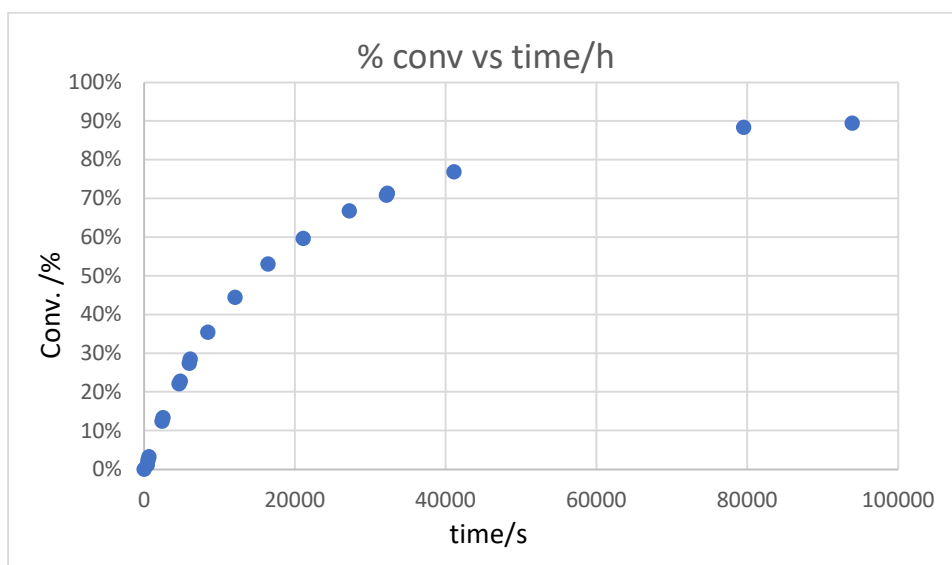

Second order rate graph:

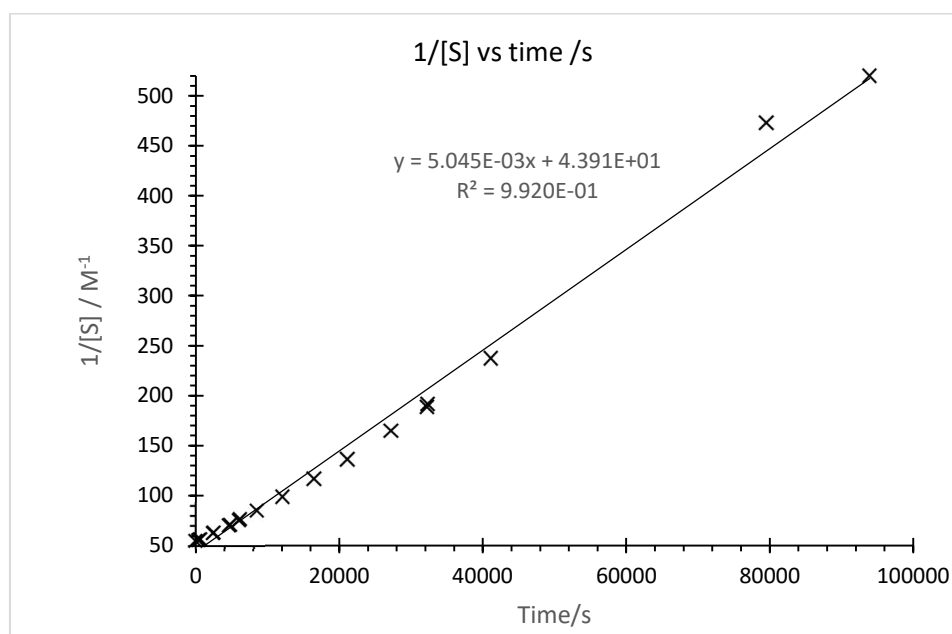

[alkyne] initial = 22 mM, CDCl<sub>3</sub>.

$$k = 5.0 \text{ mM}^{-1} \text{ s}^{-1}.$$

In this instance, the NMR spectra for the time course of the experiment have been included, to illustrate the change in peaks observed during the conversion:

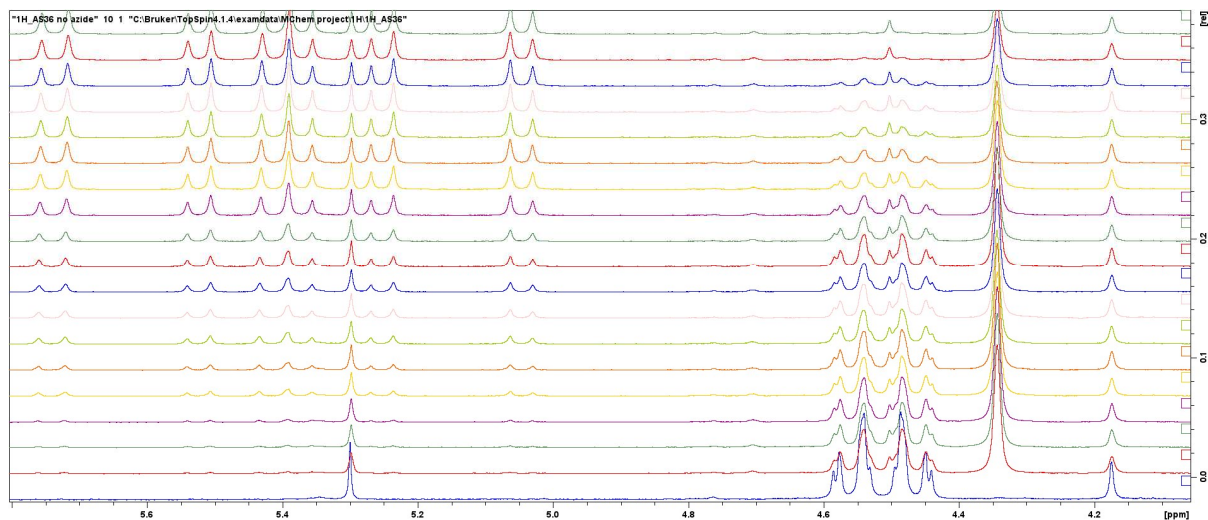

From bottom to top : t = 7 minutes, t = 9 minutes, t = 11 minutes, t = 40 minutes, t = 42 minutes, t = 77 minutes, t = 80 minutes, t = 100 minutes, t = 102 minutes, t = 141 minutes, 201 minutes, t = 274 minutes, t = 352 minutes, t = 454 minutes, t = 536 minutes, t = 538 minutes, t = 685 minutes, t = 22 hours, t = 26 hours.

diTs, C4 **54** in D6-DMSO. Conversion vs time:

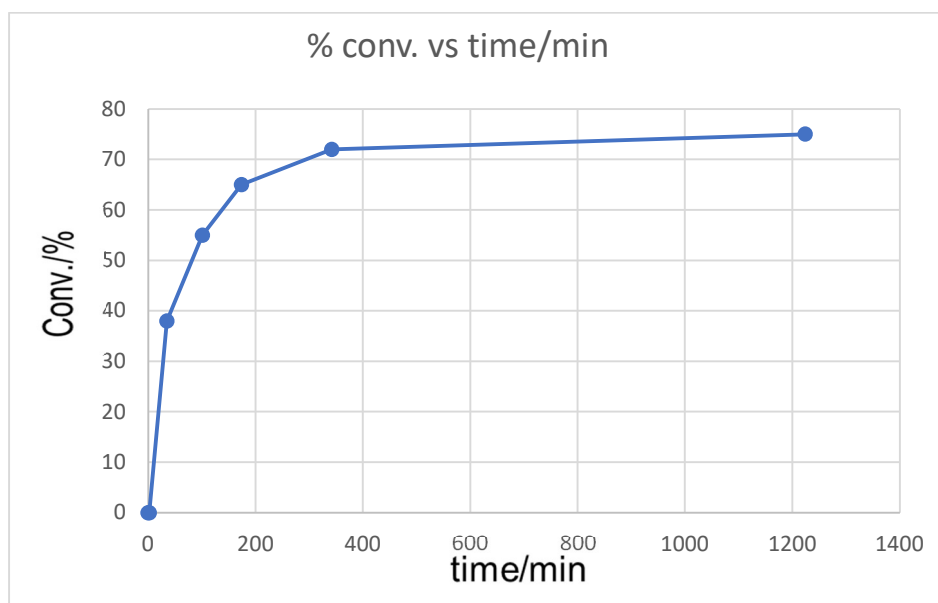

Second order rate graph:

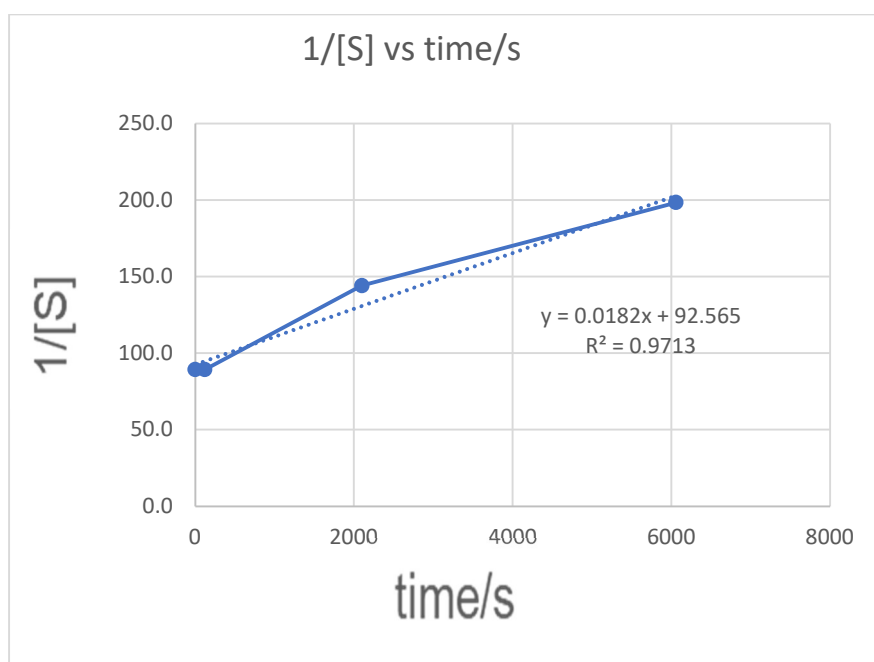

[alkyne] initial = 11 mM, d6-DMSO.

$$k = 18.3 \text{ mM}^{-1} \text{ s}^{-1}.$$

diMs, C4 56 in D6-DMSO. Conversion vs time:

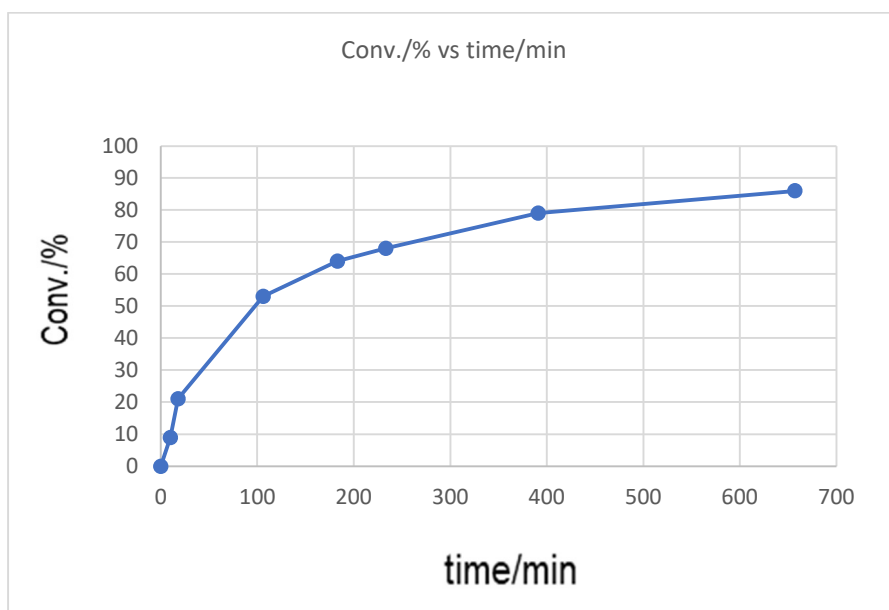

Second order rate graph:

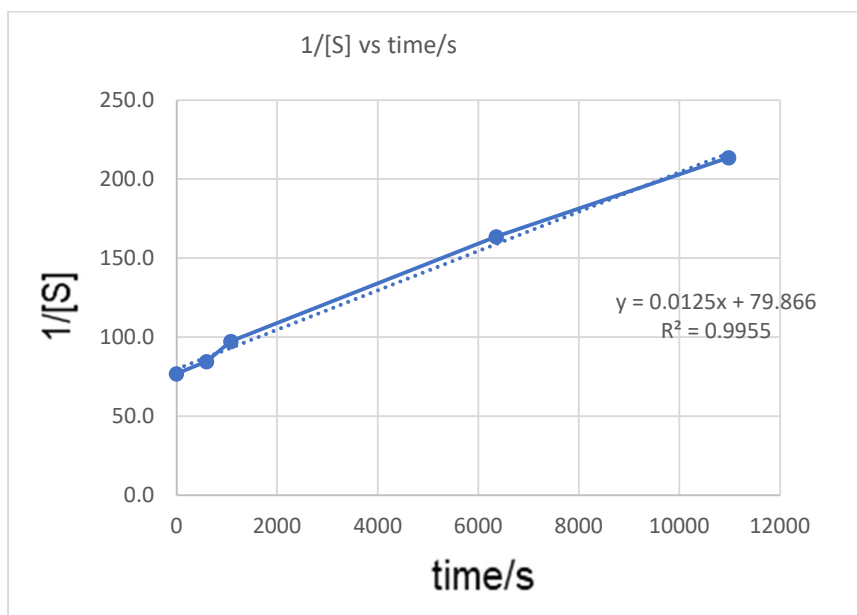

[alkyne] initial = 13 mM, d6-DMSO.

$$k = 12.5 \text{ mM}^{-1} \text{ s}^{-1}$$

Reactions of **54** and **56** with  $\text{PhN}_3$ .

Reaction of **54** with  $\text{PhN}_3$  solution in tBuOMe

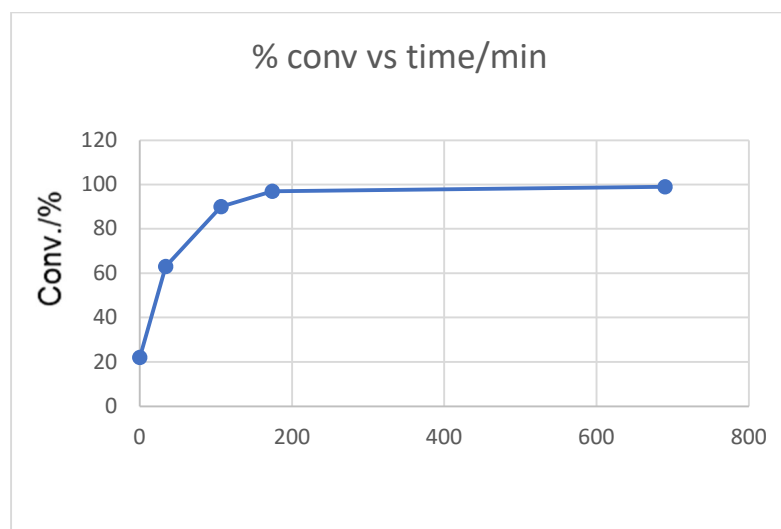

[alkyne] initial = 11.2 mM,  $\text{CDCl}_3$ .

$k$  value cannot be accurately generated because the  $[\text{PhN}_3]$  cannot be confirmed to be 1 eq.. The product was not purified or fully characterised.

Reaction of **56** with  $\text{PhN}_3$  solution in tBuOMe.

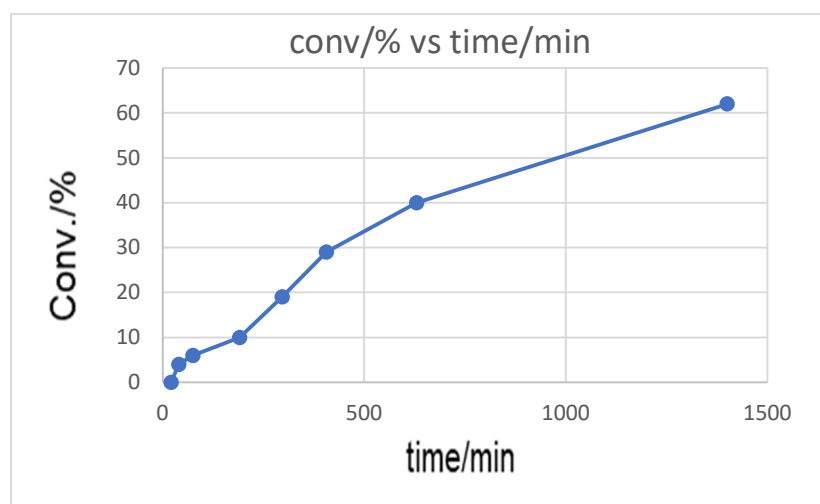

[alkyne] initial = 16.8 mM,  $\text{CDCl}_3$ .

$k$  value cannot be accurately generated because the  $[\text{PhN}_3]$  cannot be confirmed to be 1 eq.. The product was not purified or fully characterised.





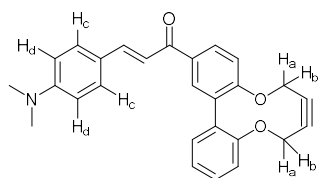

$\delta_C$  (126 MHz, CDCl<sub>3</sub>)

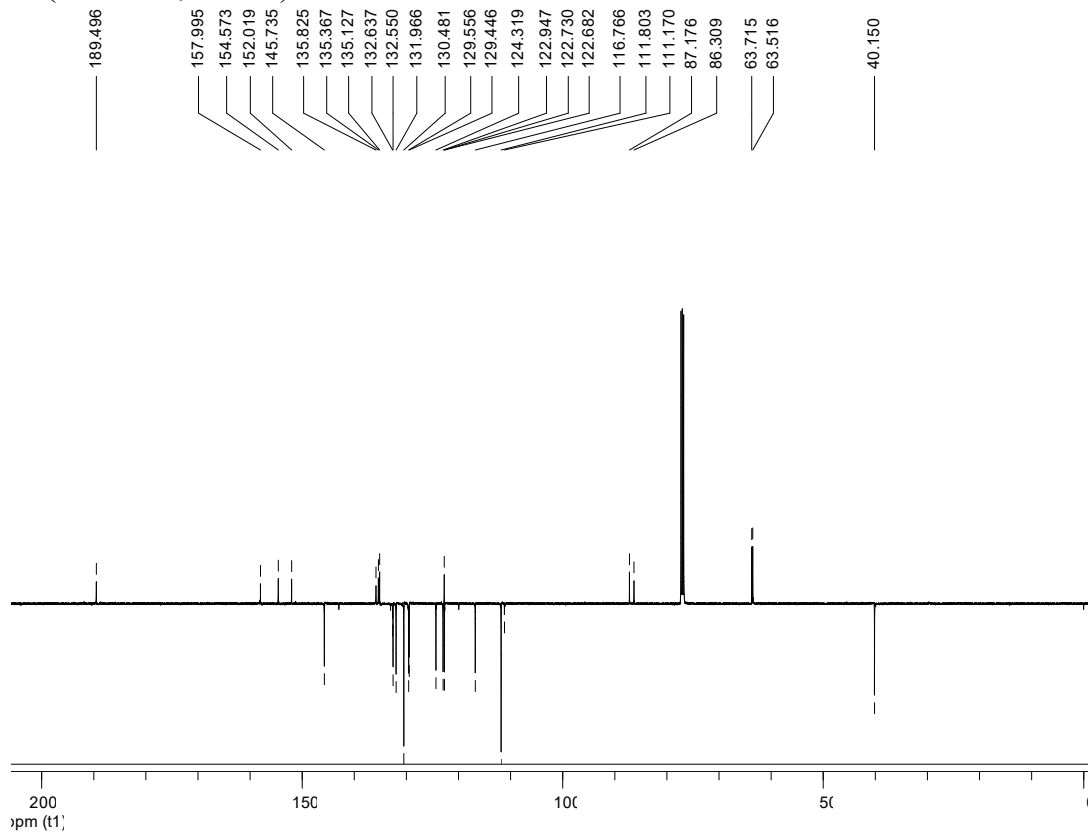

### Monochalcone azide adduct 17.

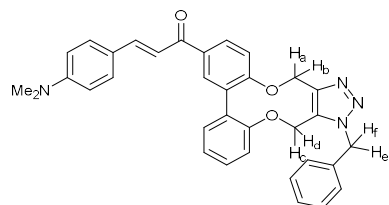

$\delta_H$  (500 MHz,  $CDCl_3$ )

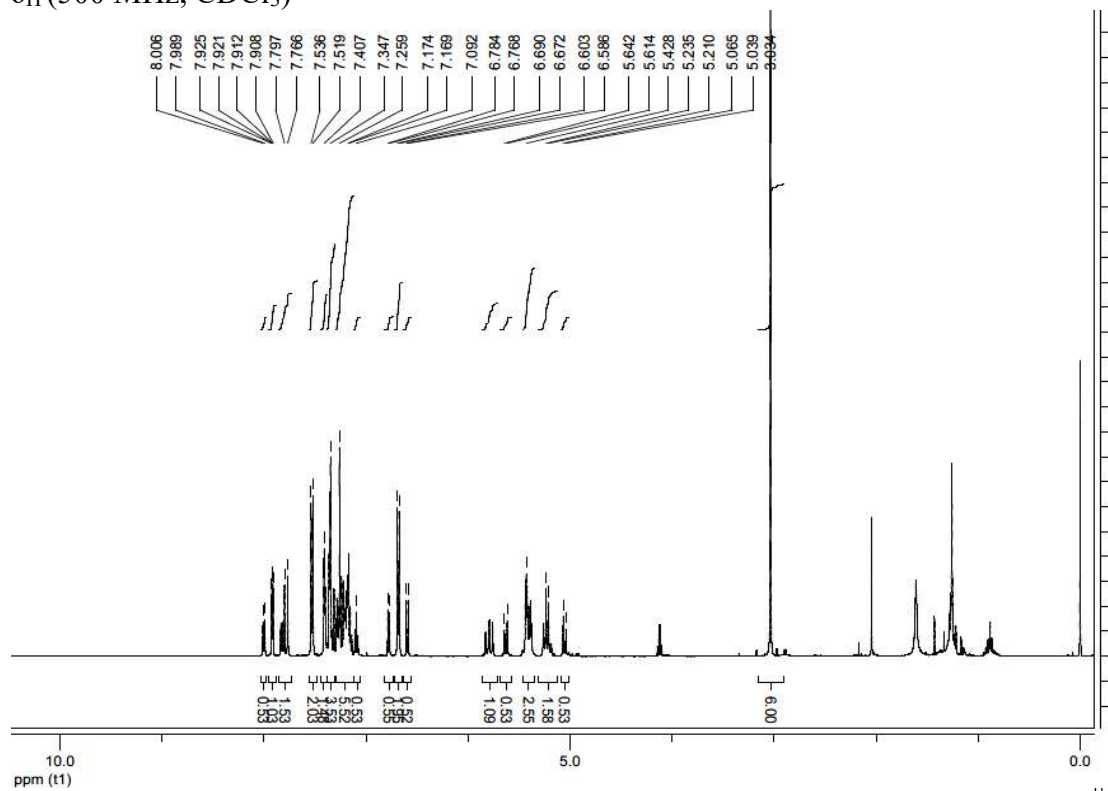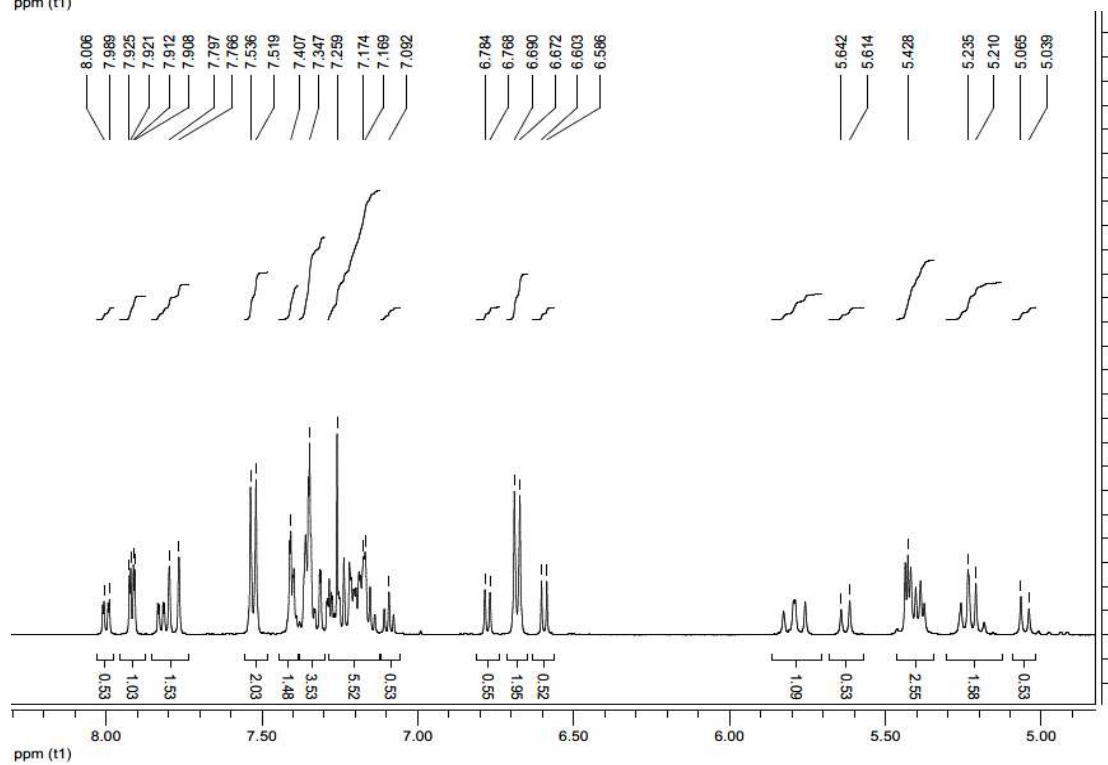

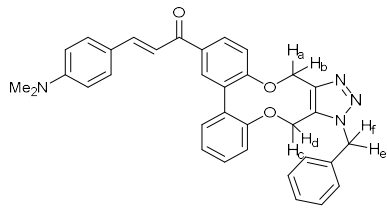

$\delta_C$  (126 MHz, CDCl<sub>3</sub>)

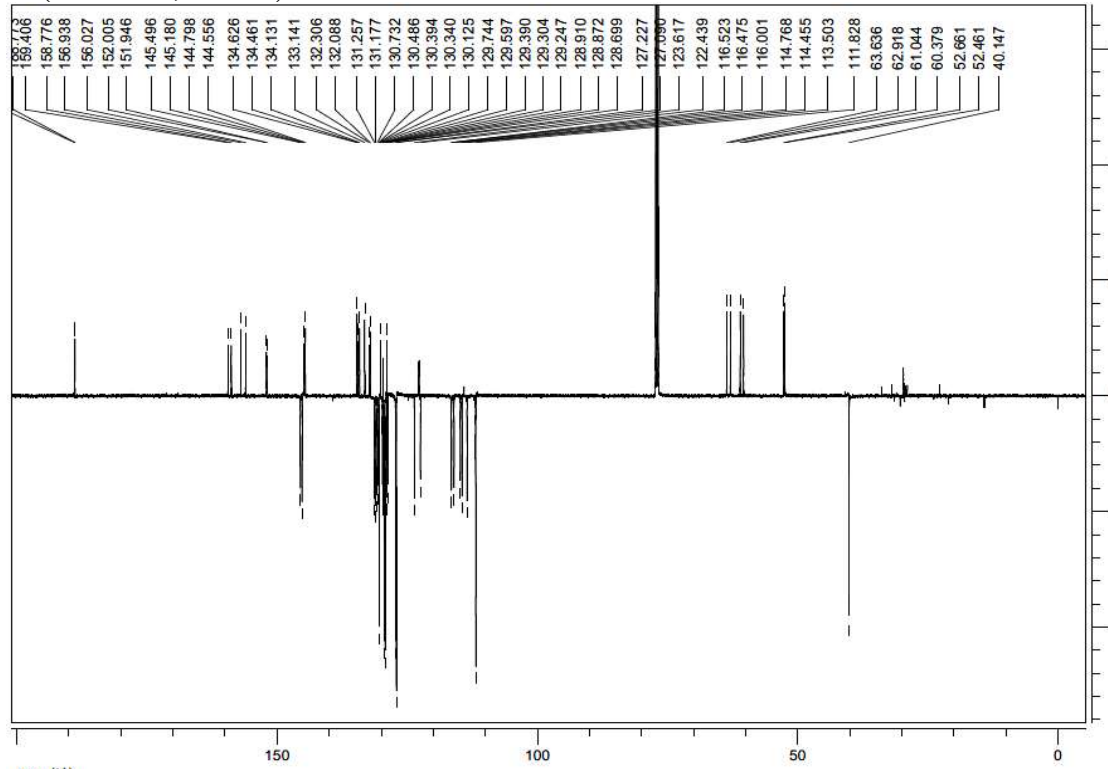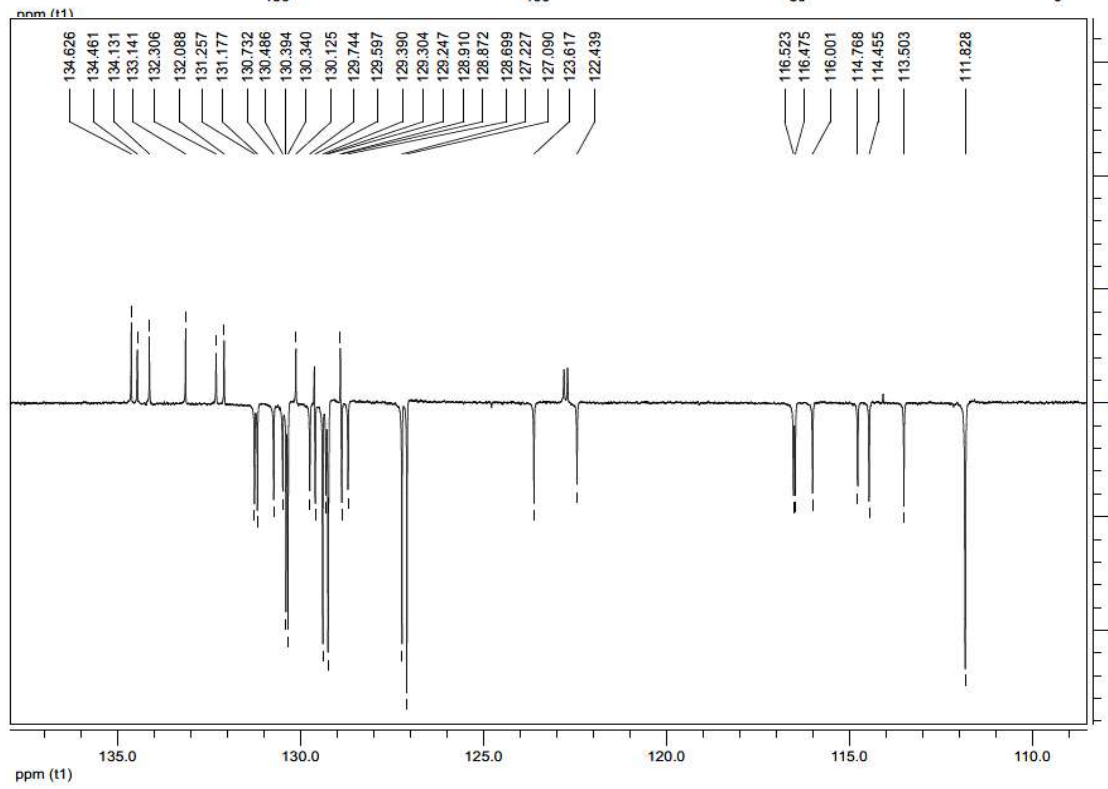

### Compound 18.

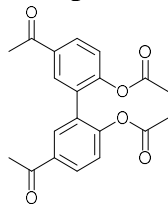

$\delta_H$  (500 MHz,  $CDCl_3$ )

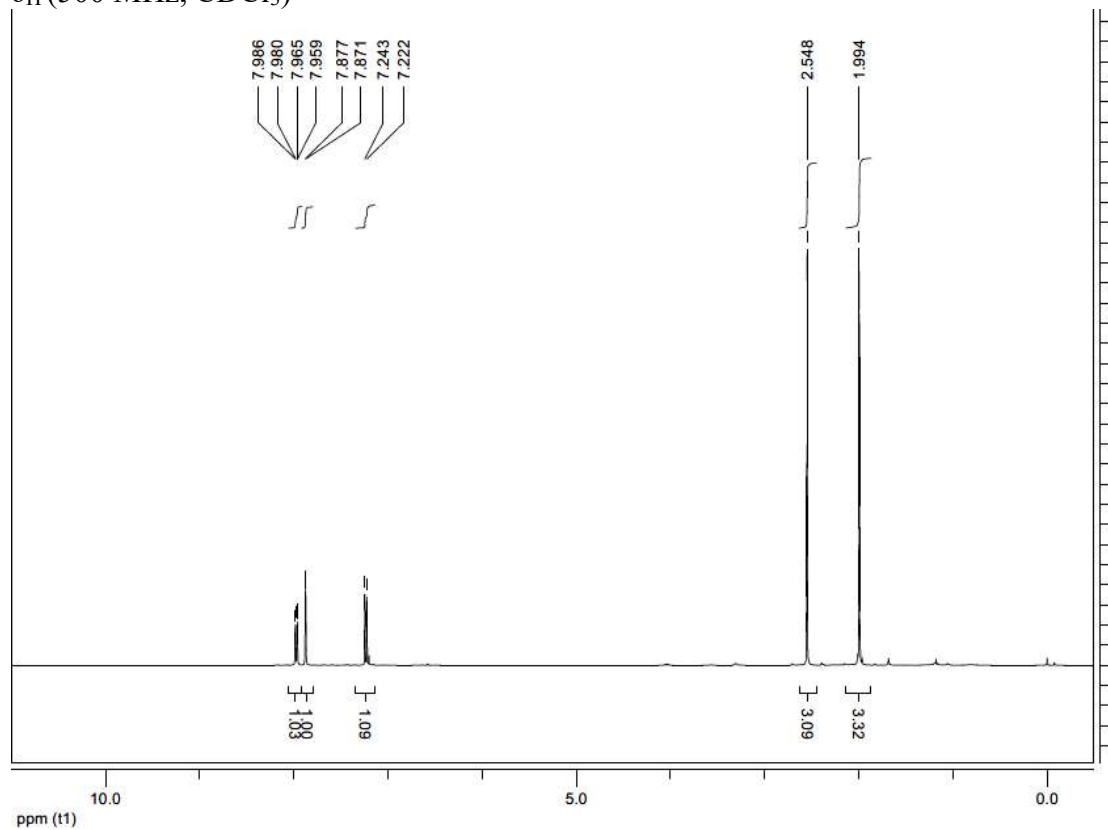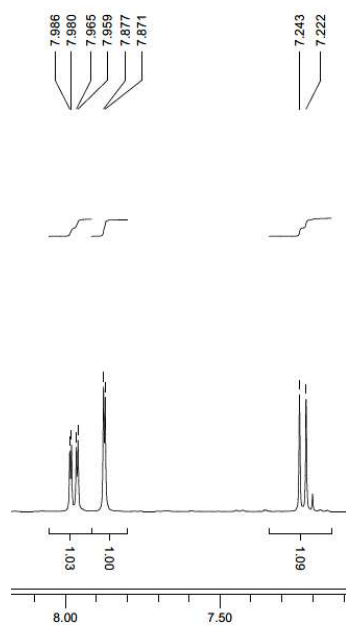

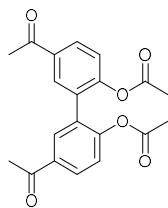

$\delta_C$  (126 MHz,  $CDCl_3$ )t

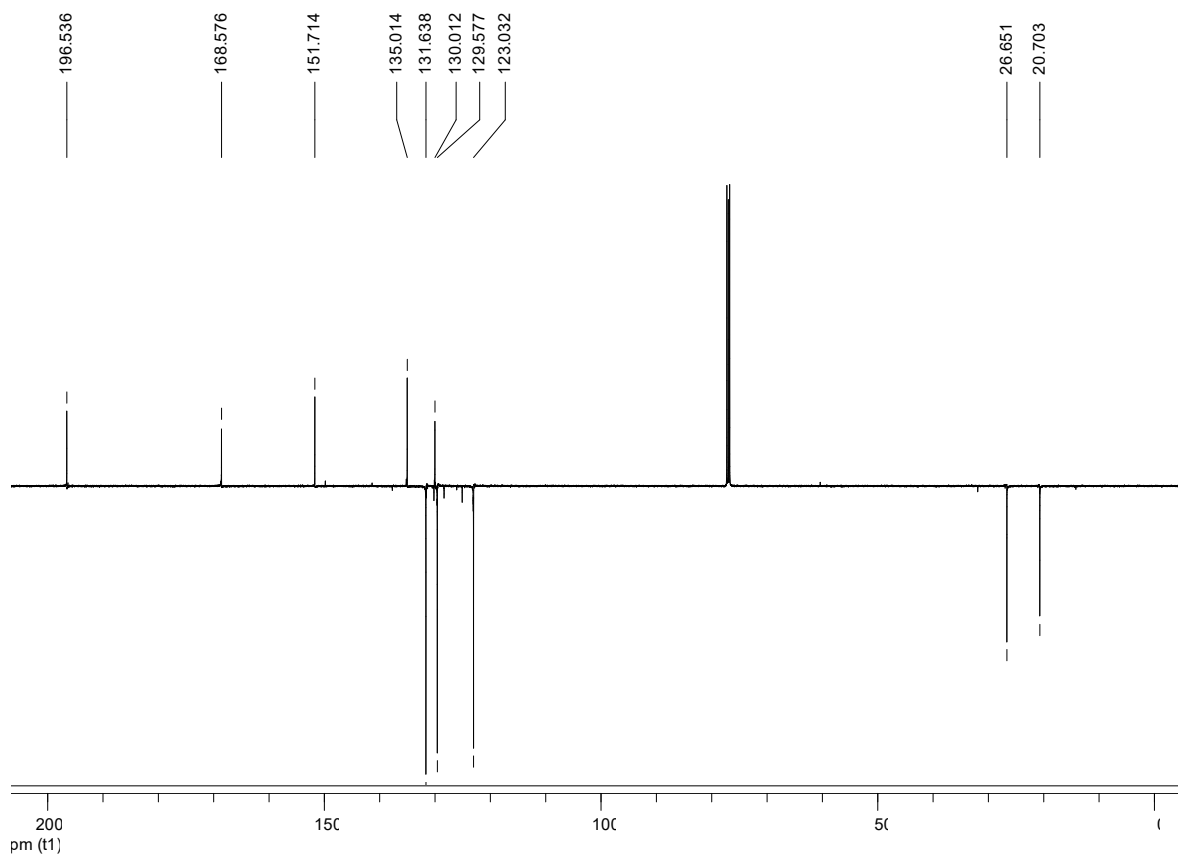

### Compound 19.

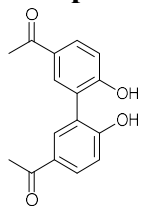

$\delta_H$  (500 MHz,  $d^6$ -DMSO)

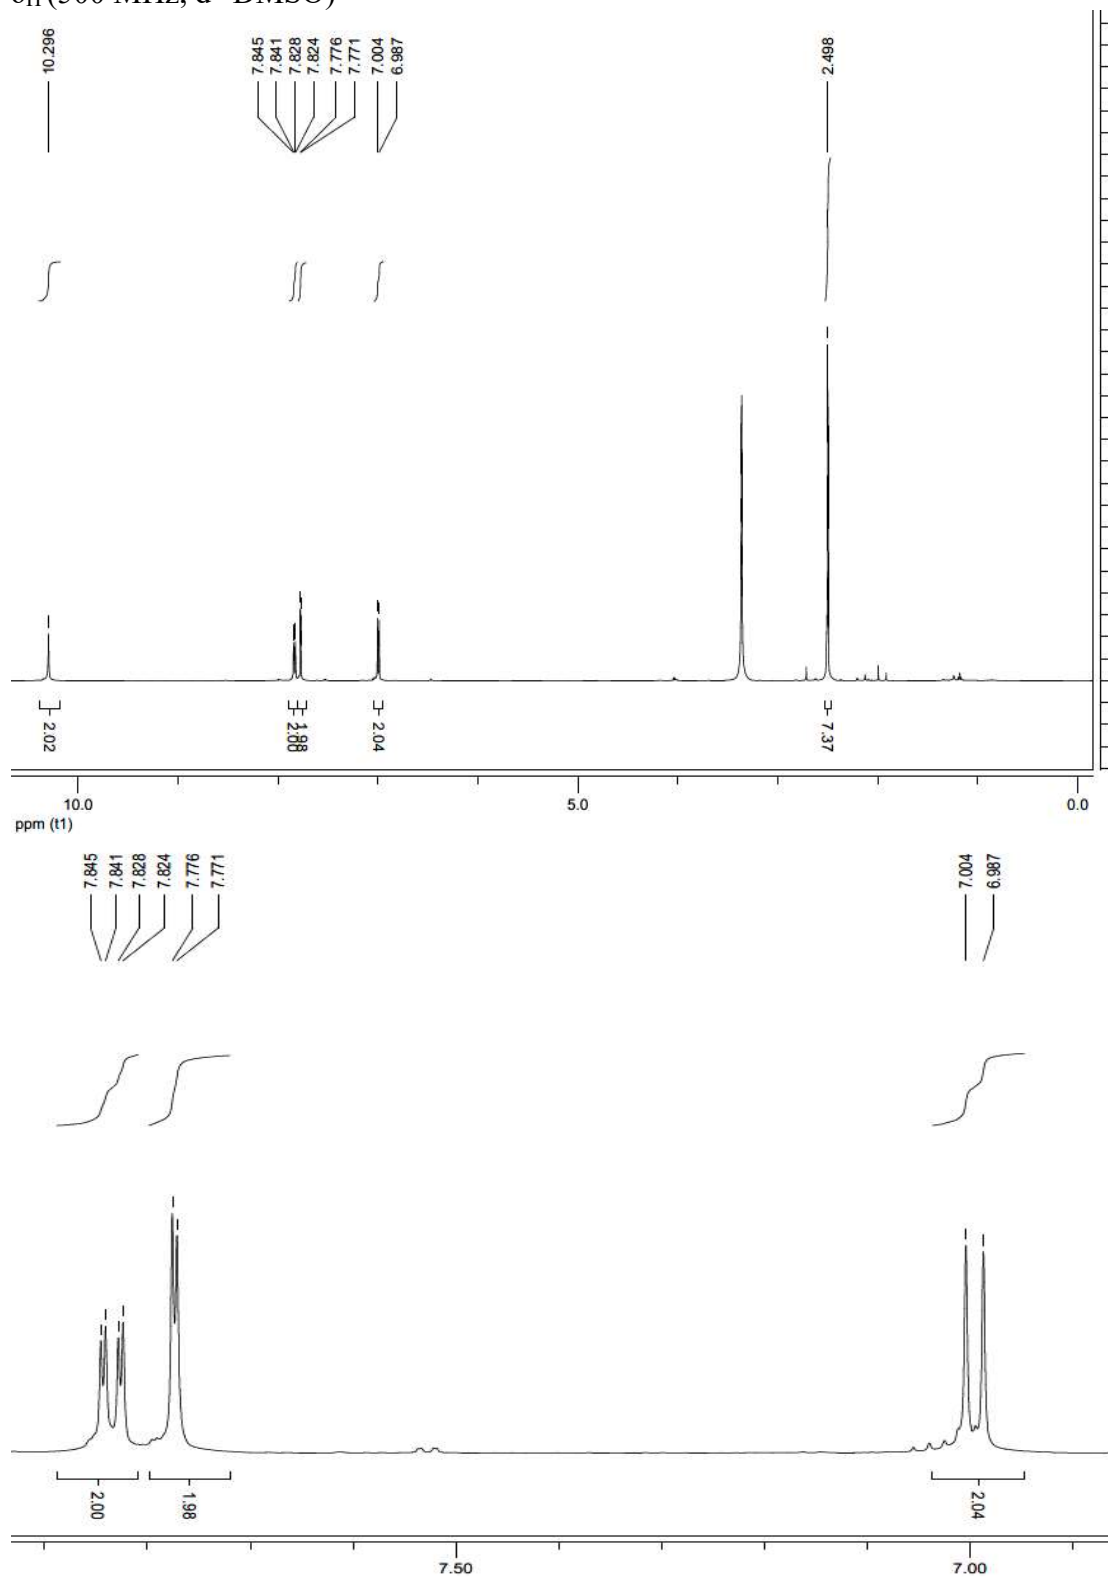

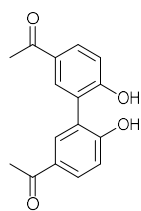

$\delta_C$  (126 MHz,  $d^6$ -DMSO)

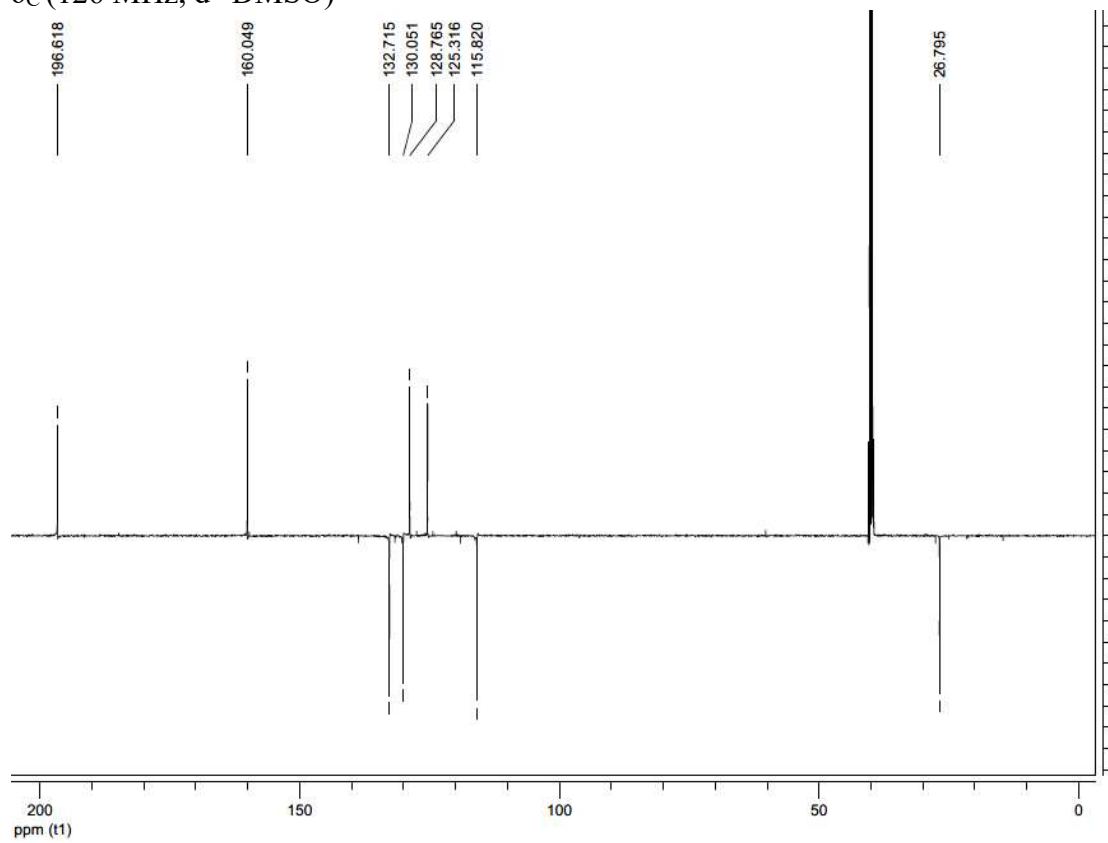

### Compound 21.

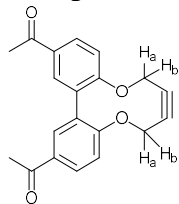

$\delta_H$  (500 MHz,  $CDCl_3$ )

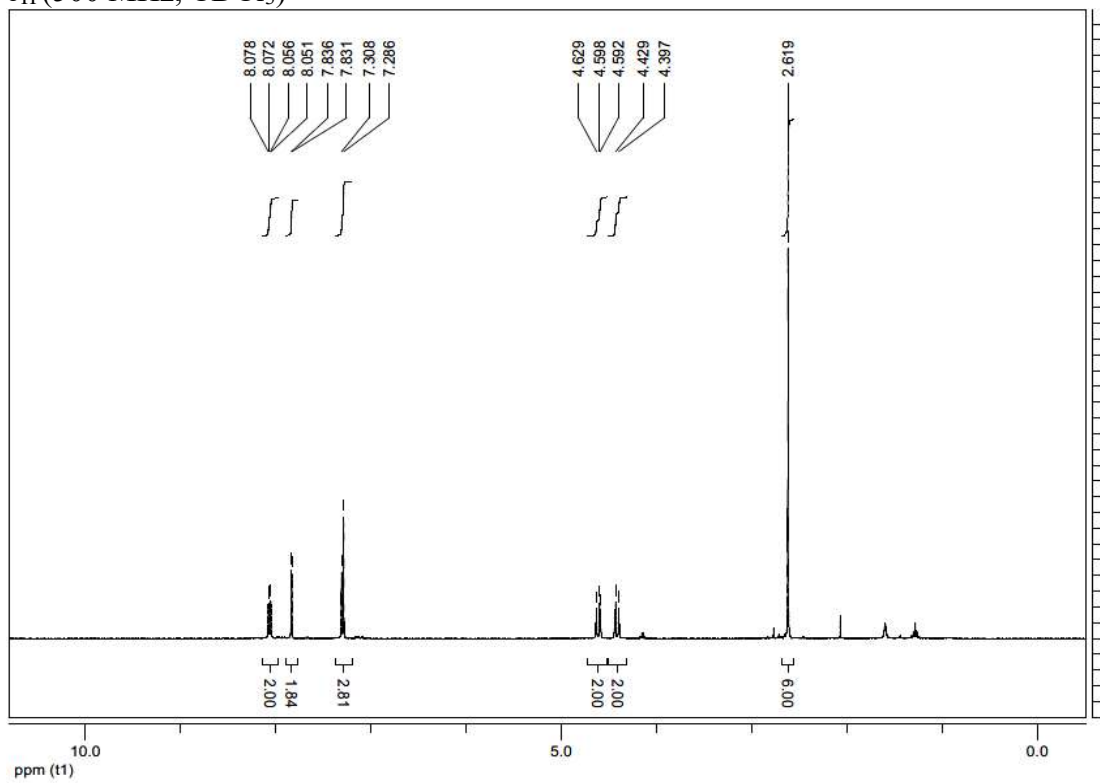

There is a small amount of EtOAc in the spectrum.

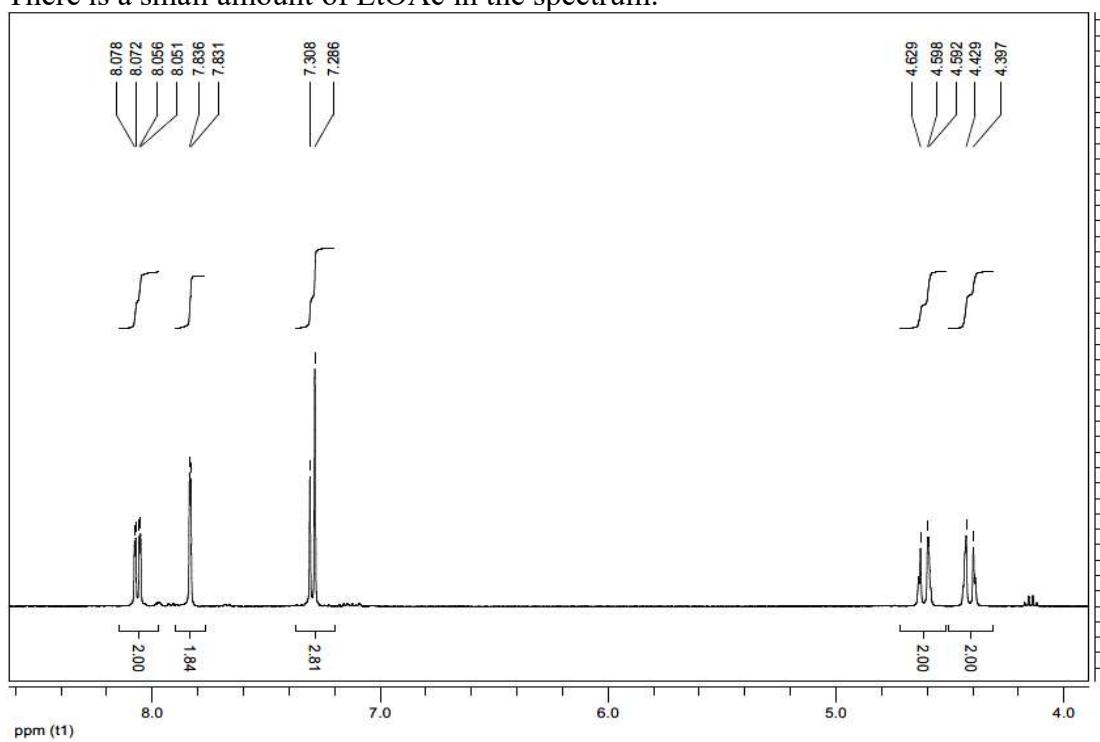





### Dichalcone 22.

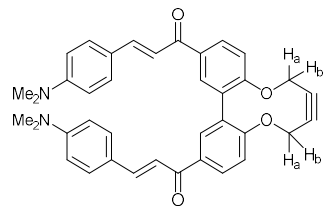

$\delta_H$  (500 MHz,  $CDCl_3$ )

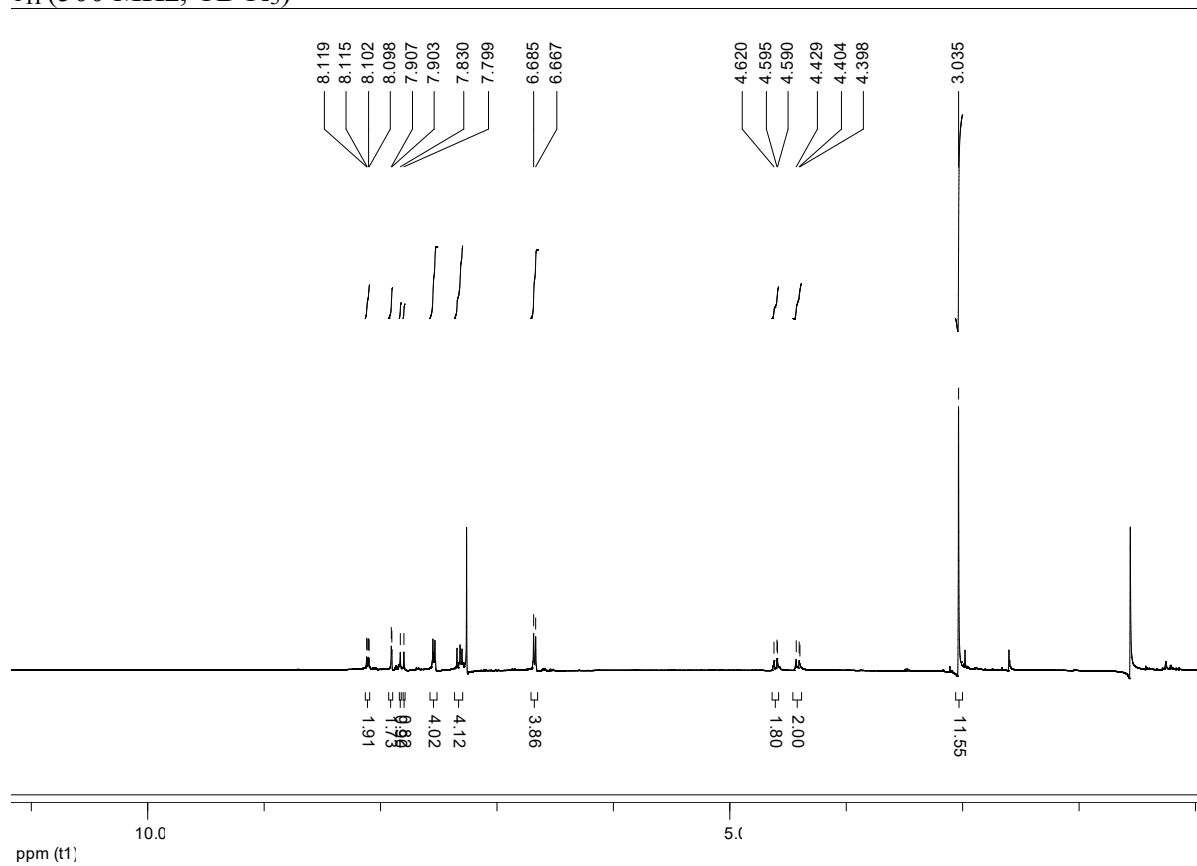

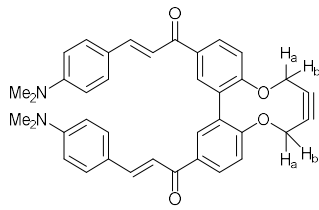

$\delta_C$  (126 MHz, CDCl<sub>3</sub>)

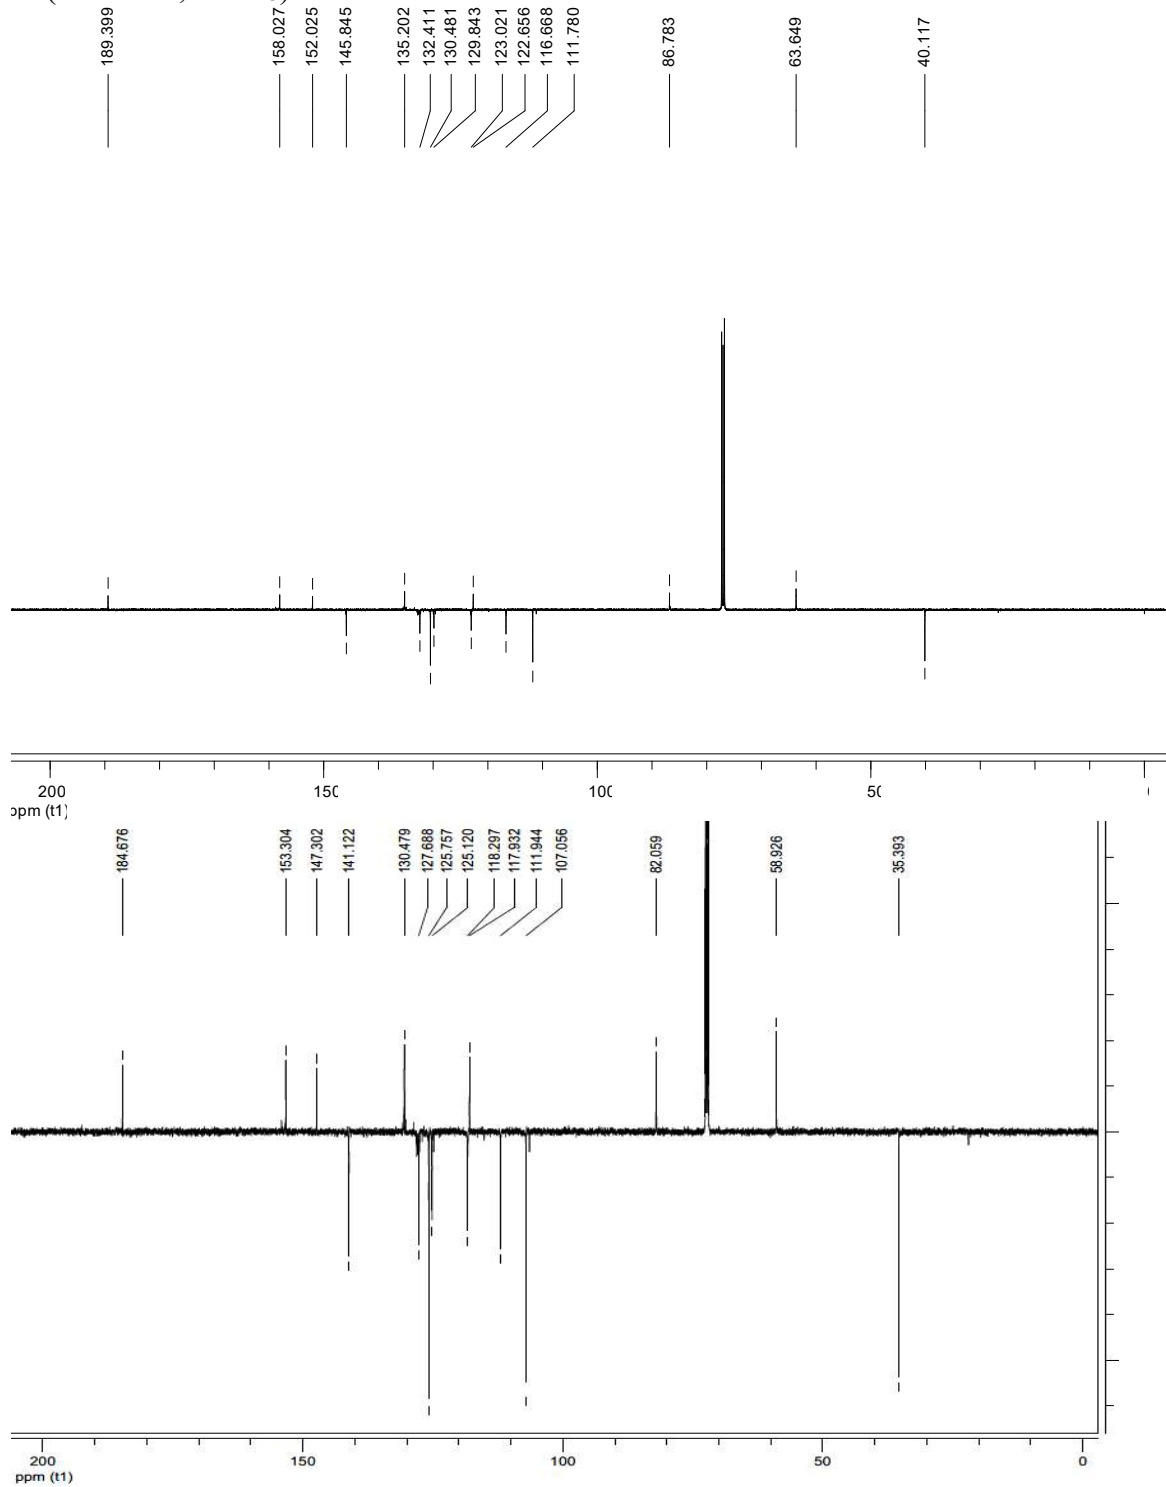

### Dichalcone azide adduct 23.

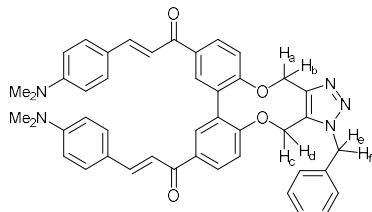

$\delta_H$  (500 MHz,  $CDCl_3$ )

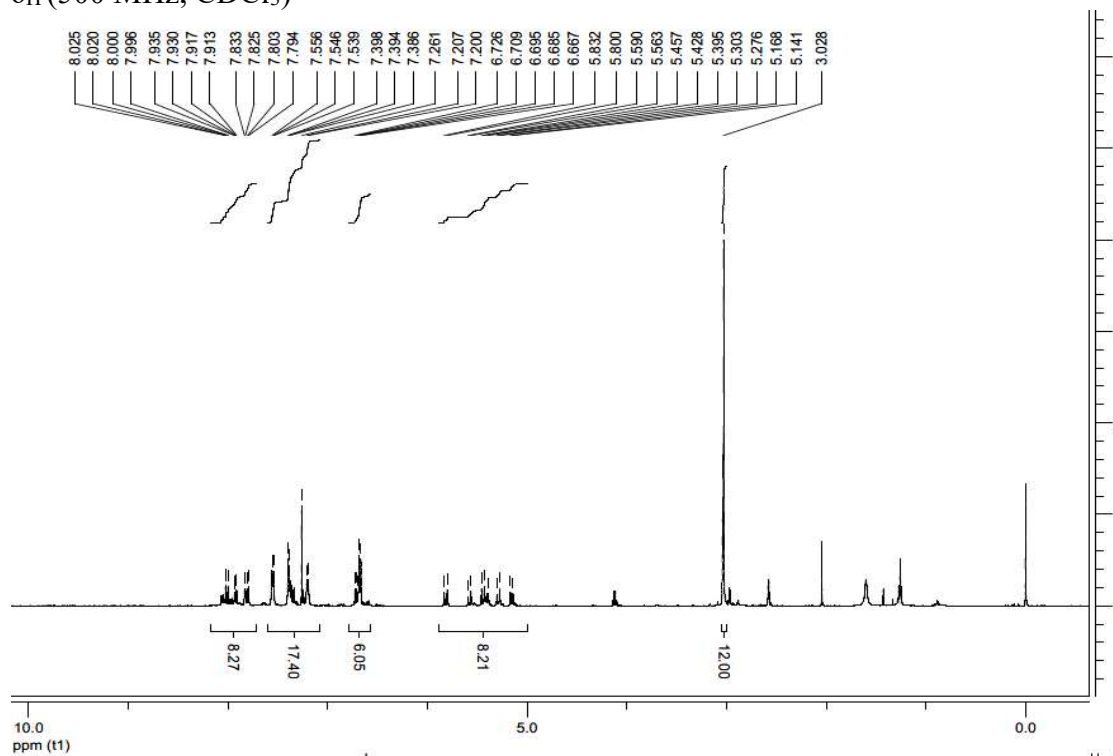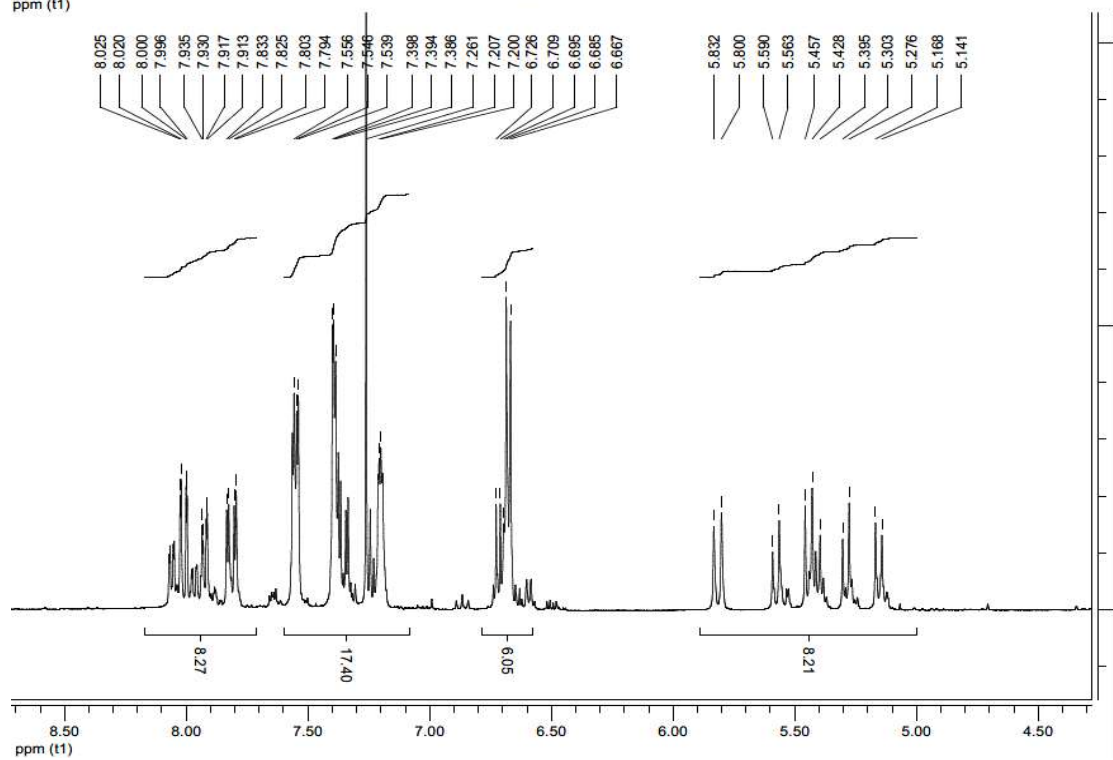

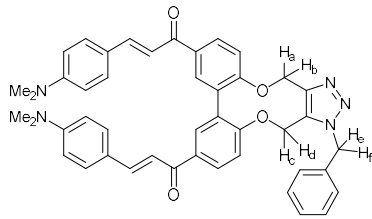

$\delta_c$  (126 MHz, CDCl<sub>3</sub>)

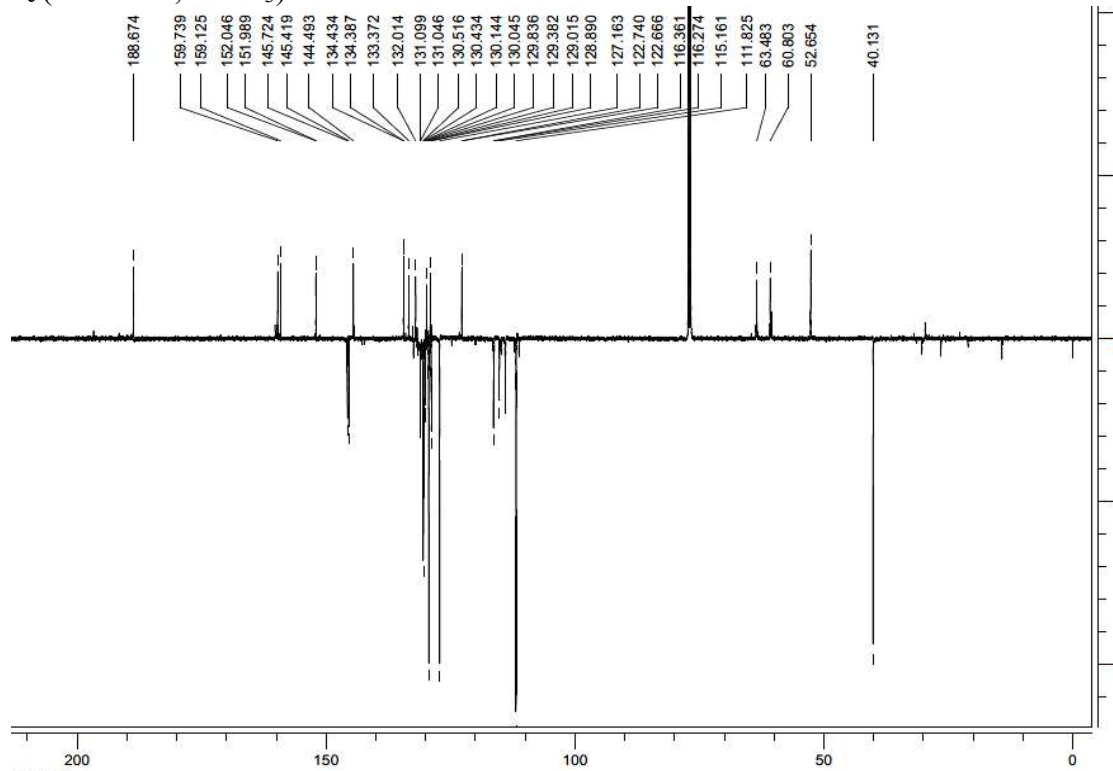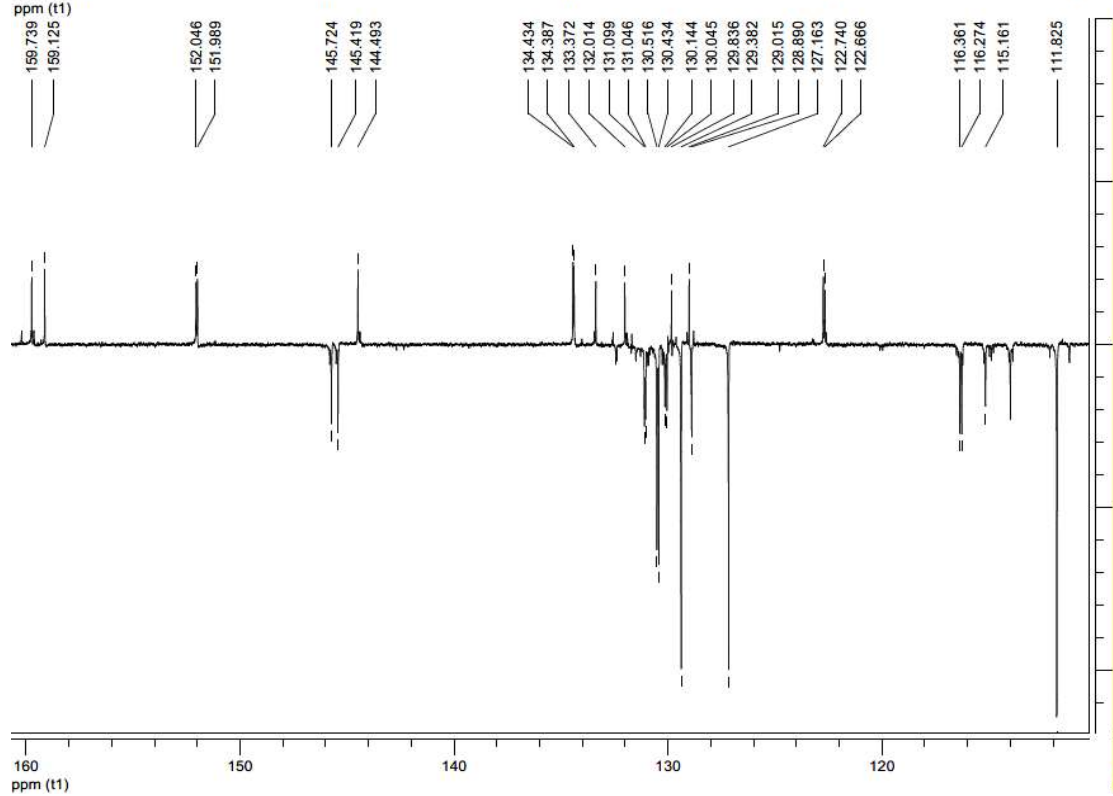

### Compound 24.

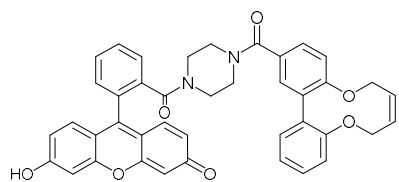

$^1\text{H}$  NMR spectrum (500 MHz,  $\text{CD}_3\text{OD}$ )

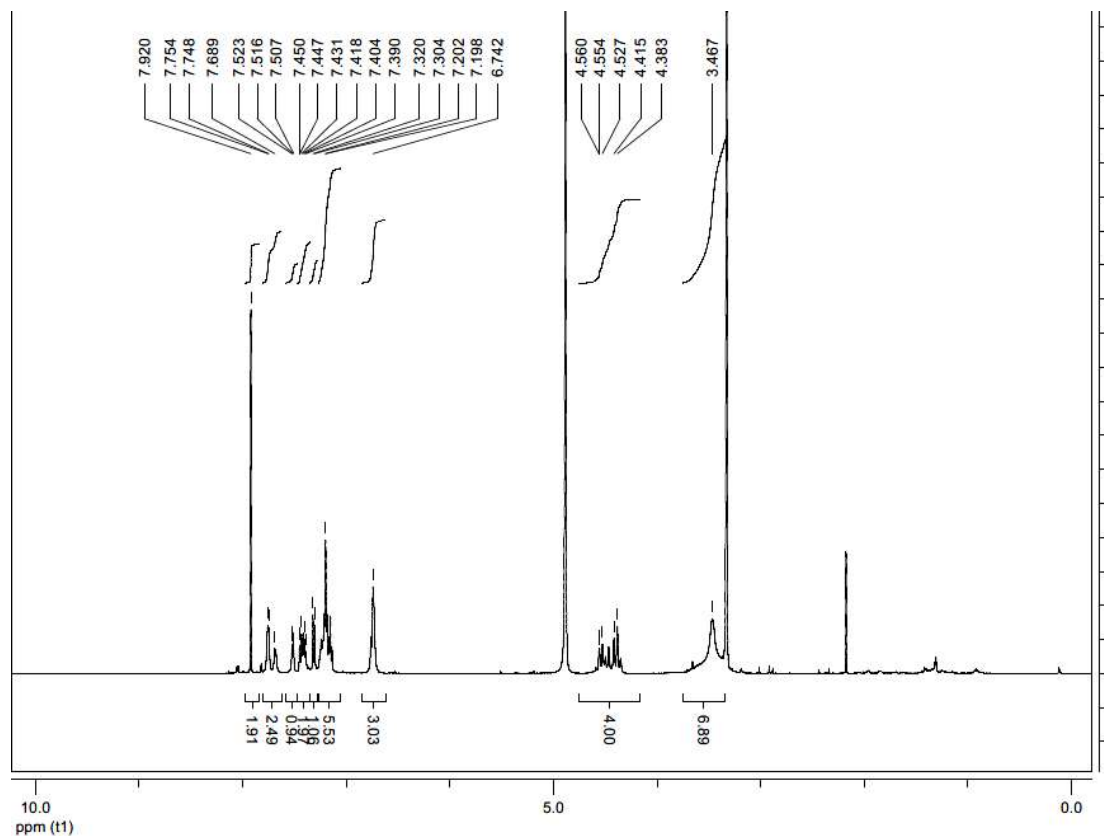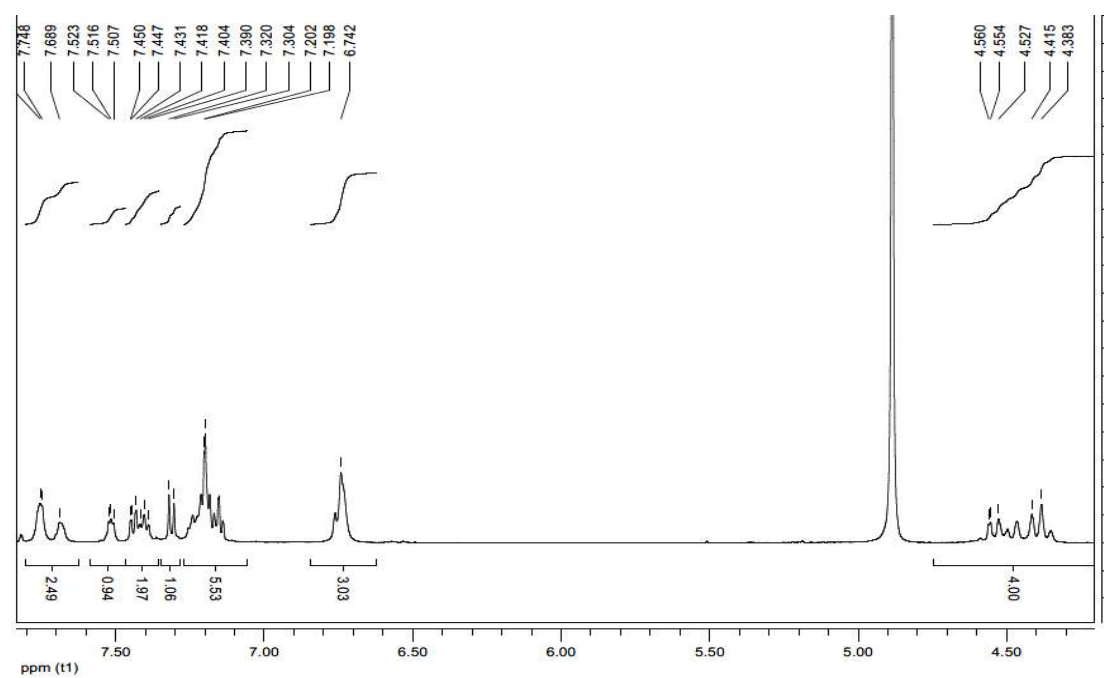

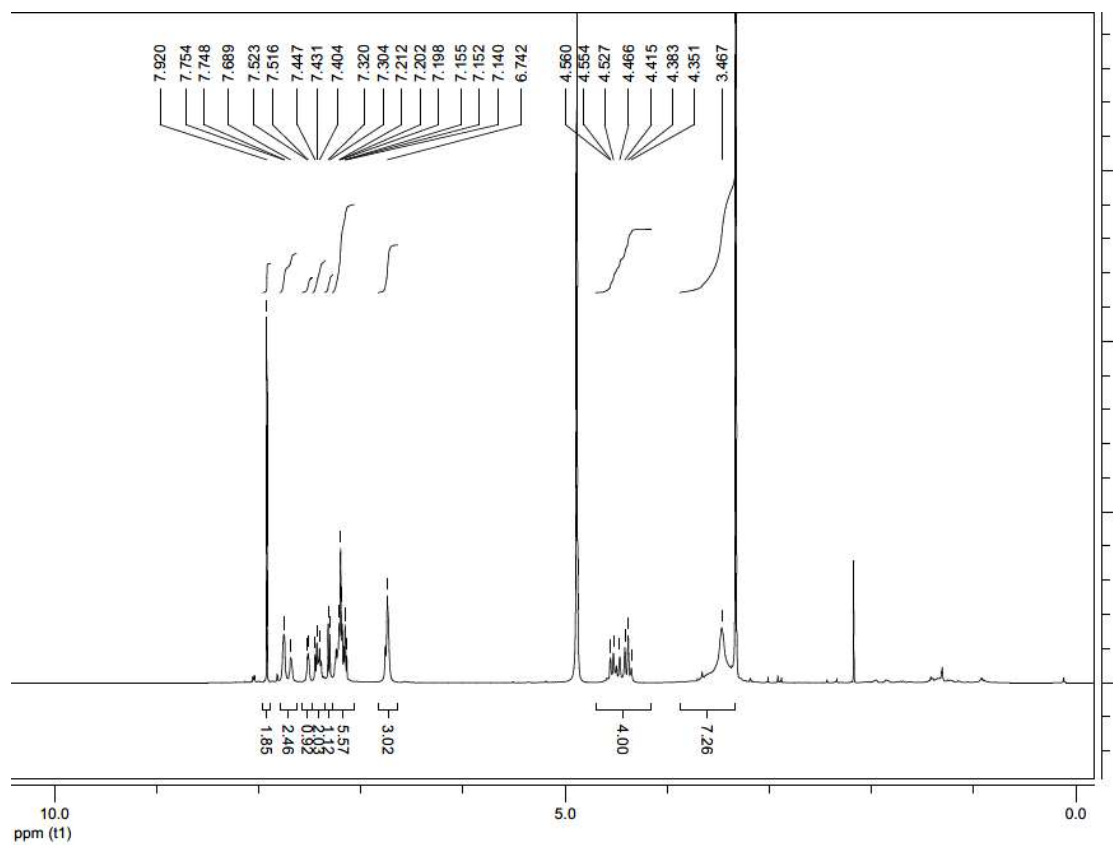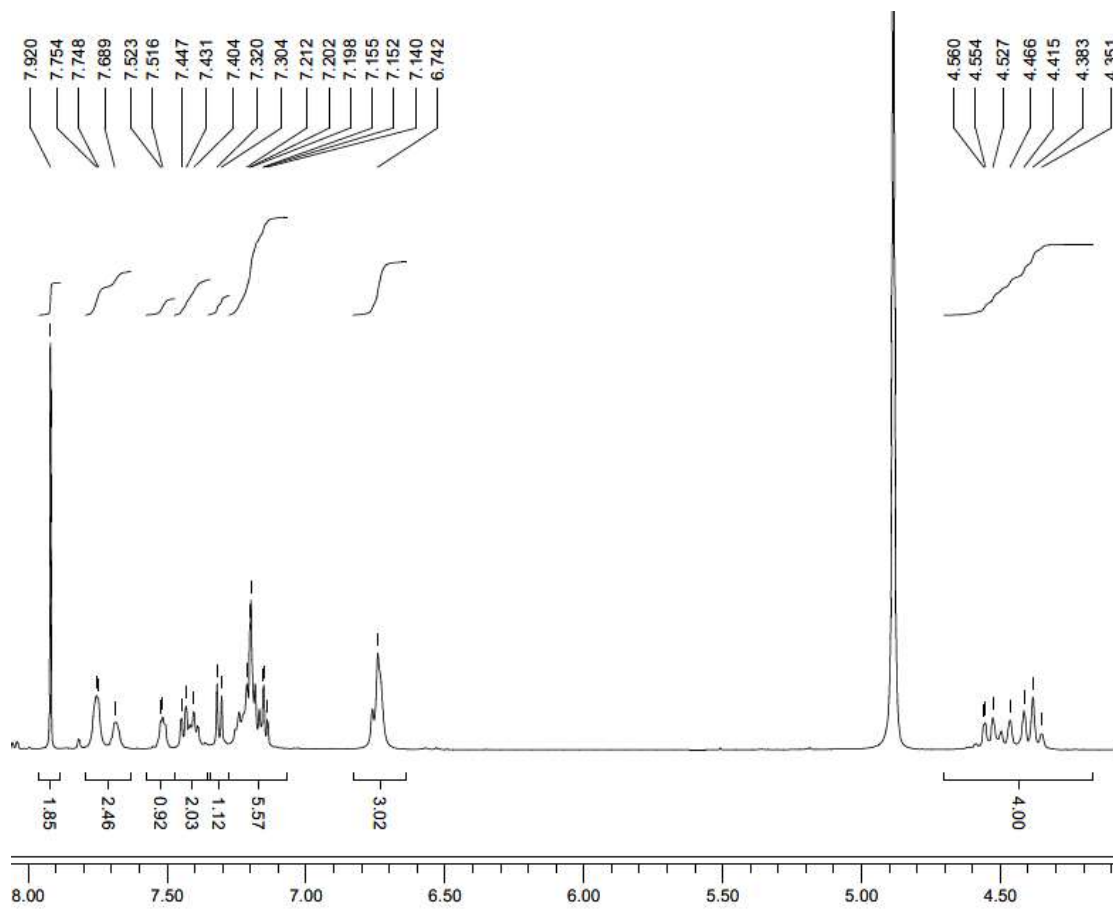

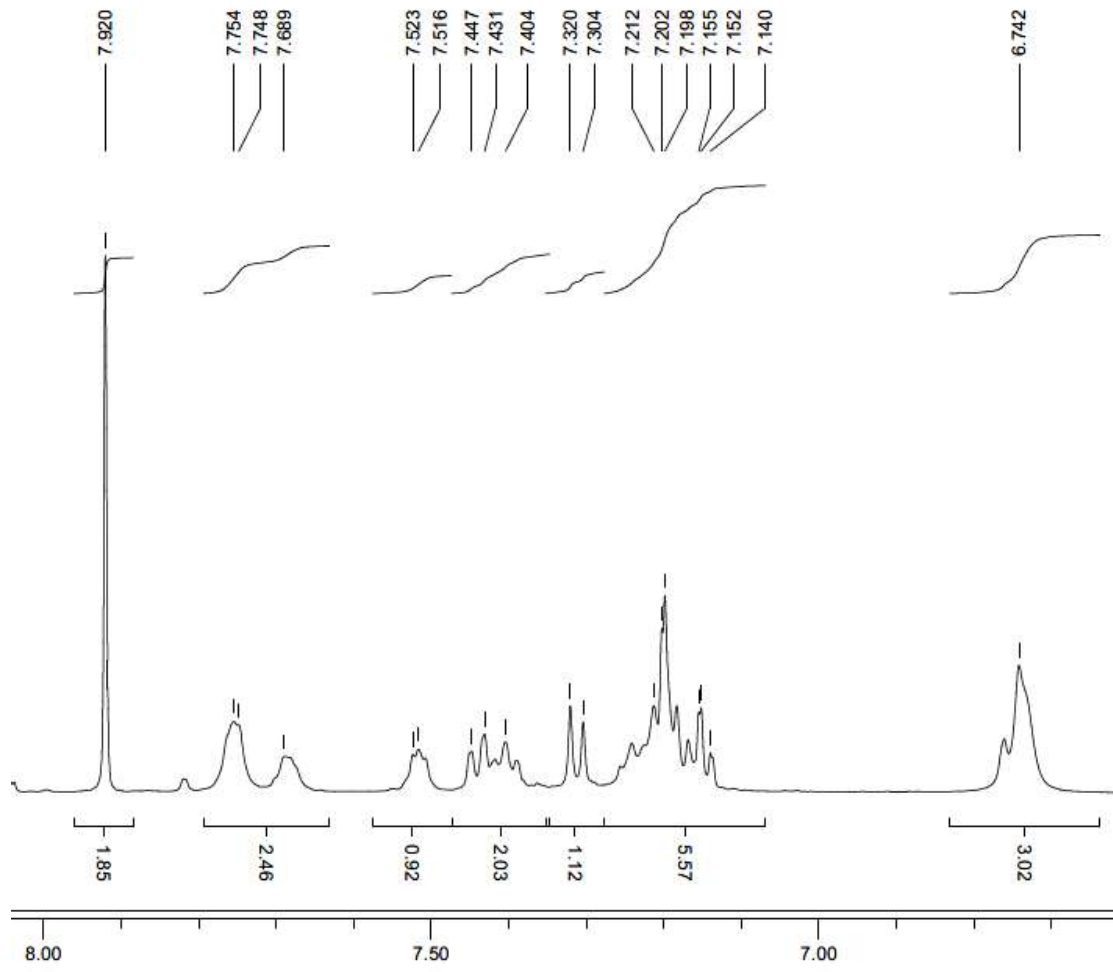



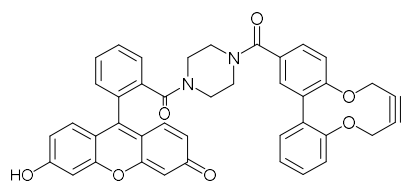

<sup>13</sup>C NMR spectrum (126 MHz, CD<sub>3</sub>OD)

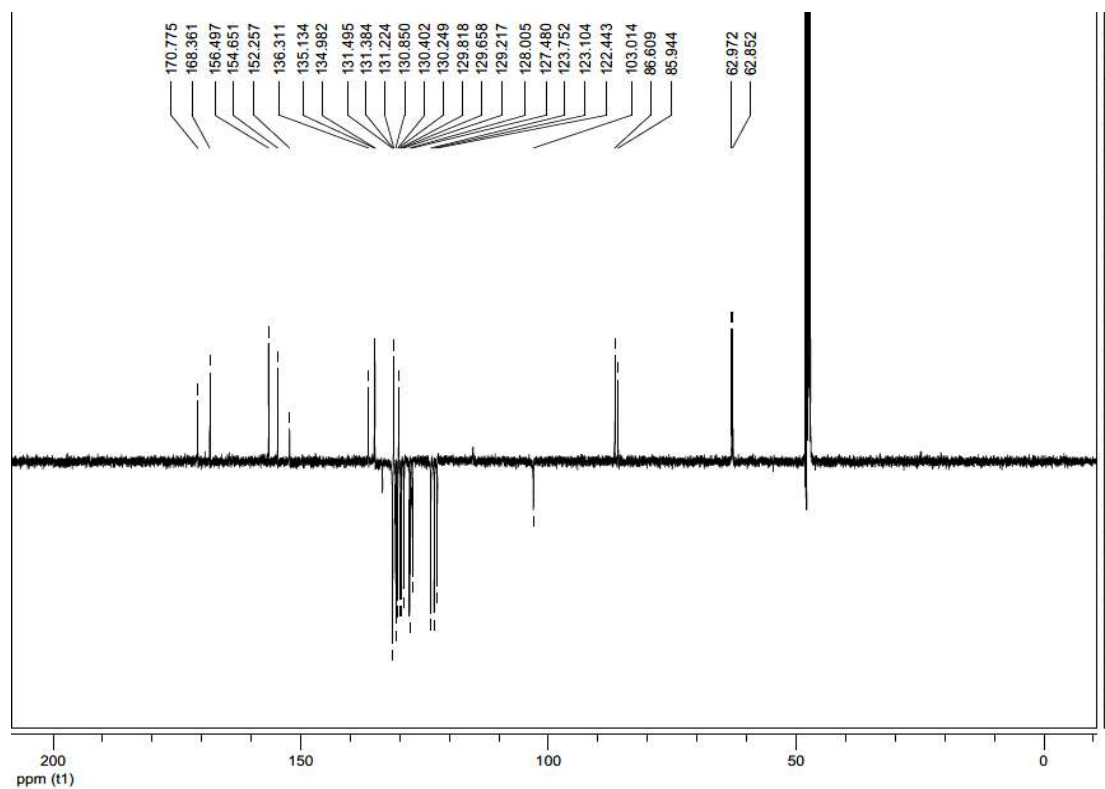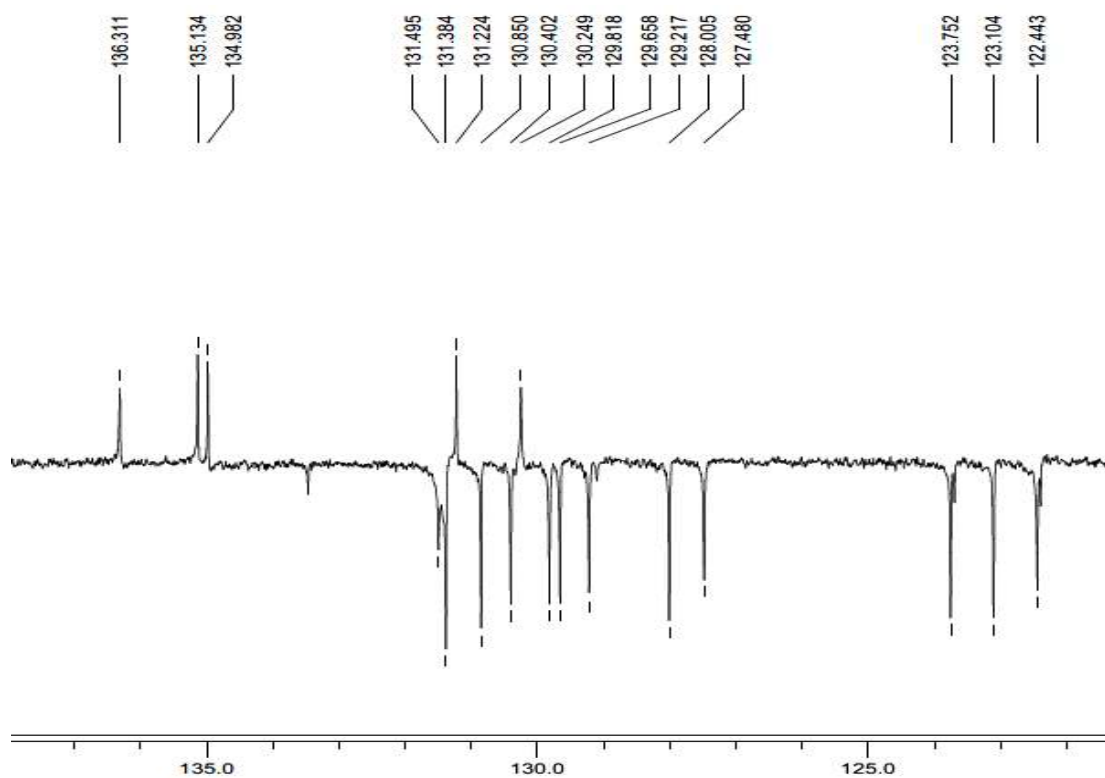

# Compound 25

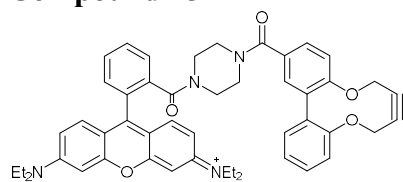

<sup>1</sup>H NMR spectrum (500 MHz, CD<sub>3</sub>OD)

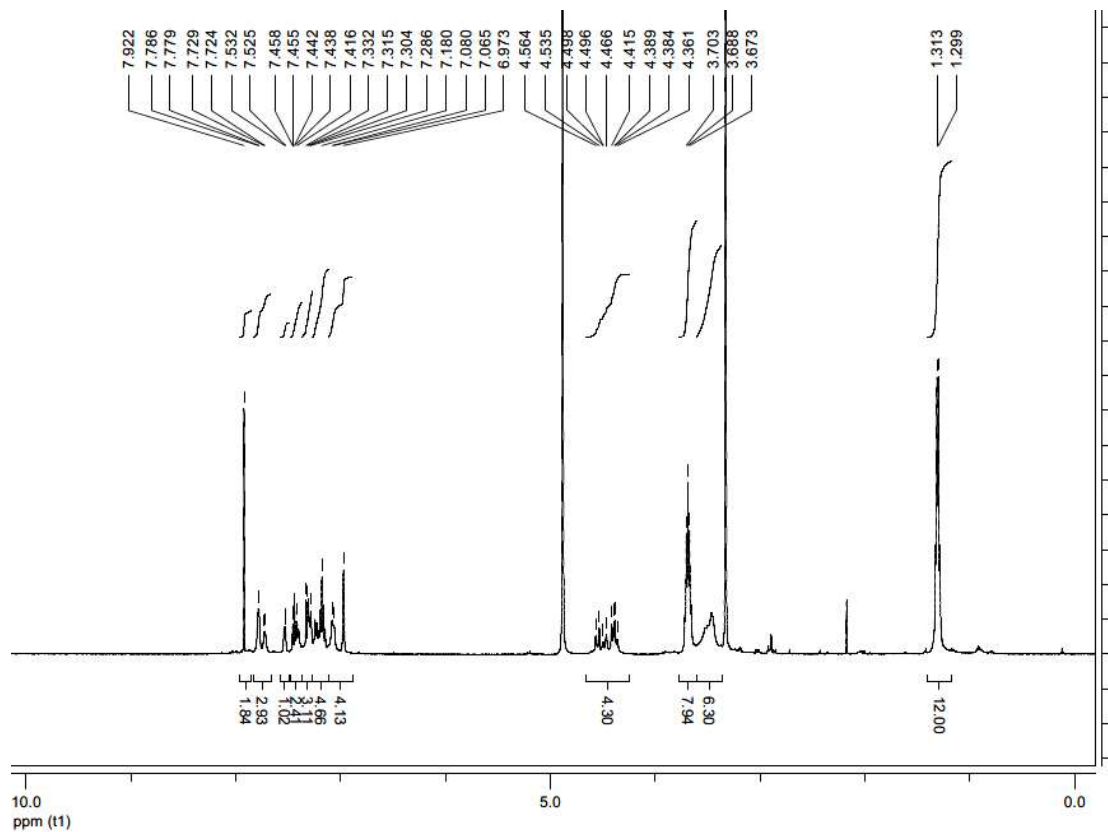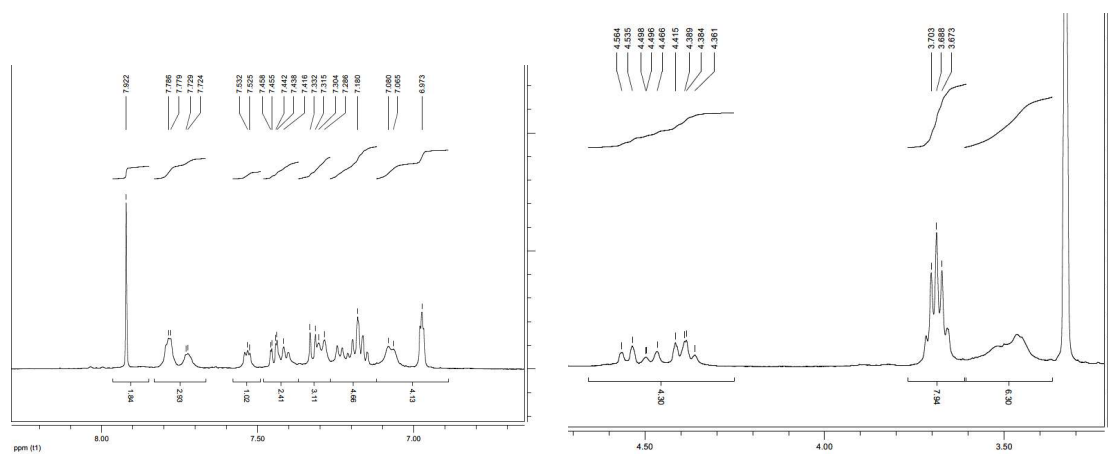

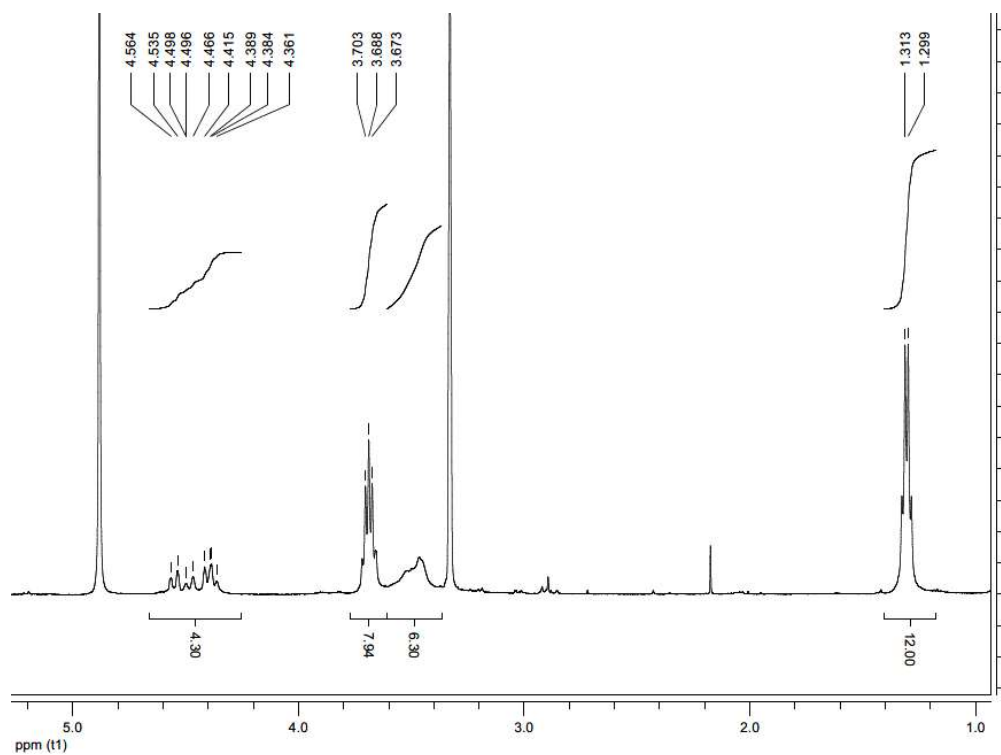

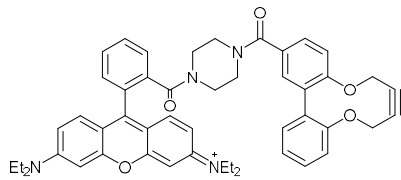

$^{13}\text{C}$  NMR spectrum (126 MHz,  $\text{CD}_3\text{OD}$ )

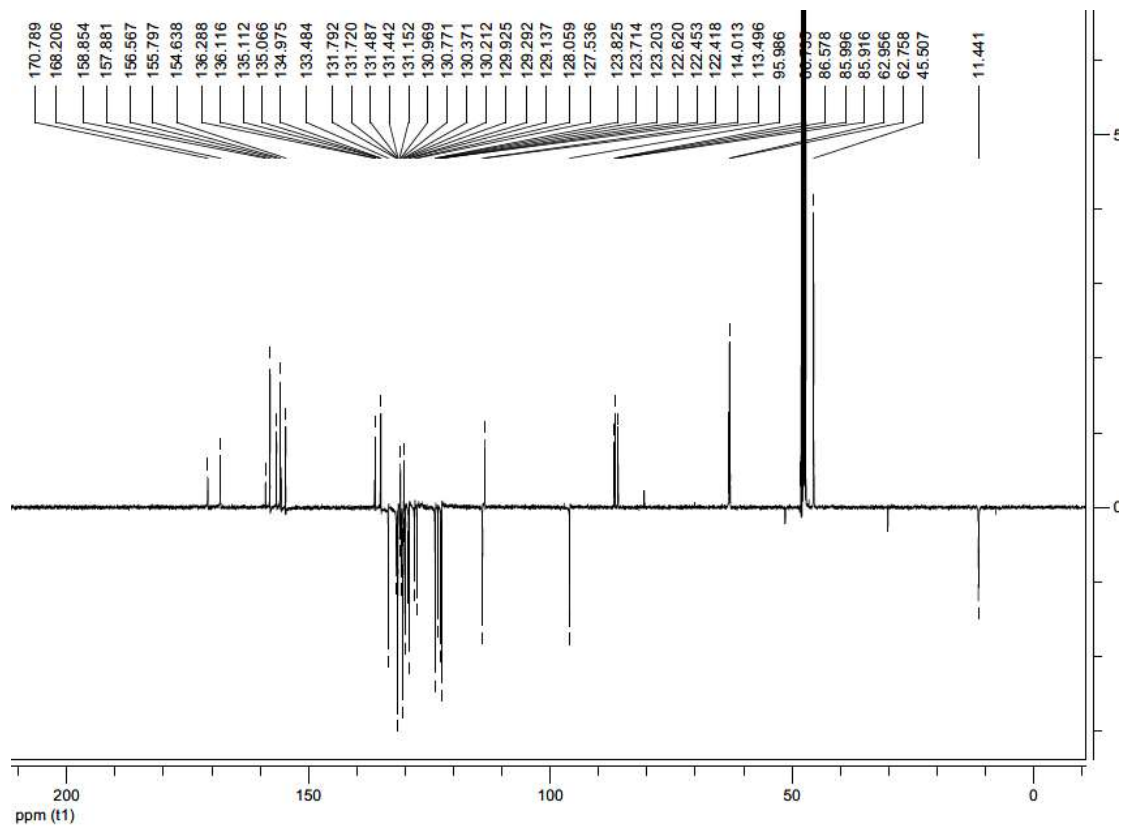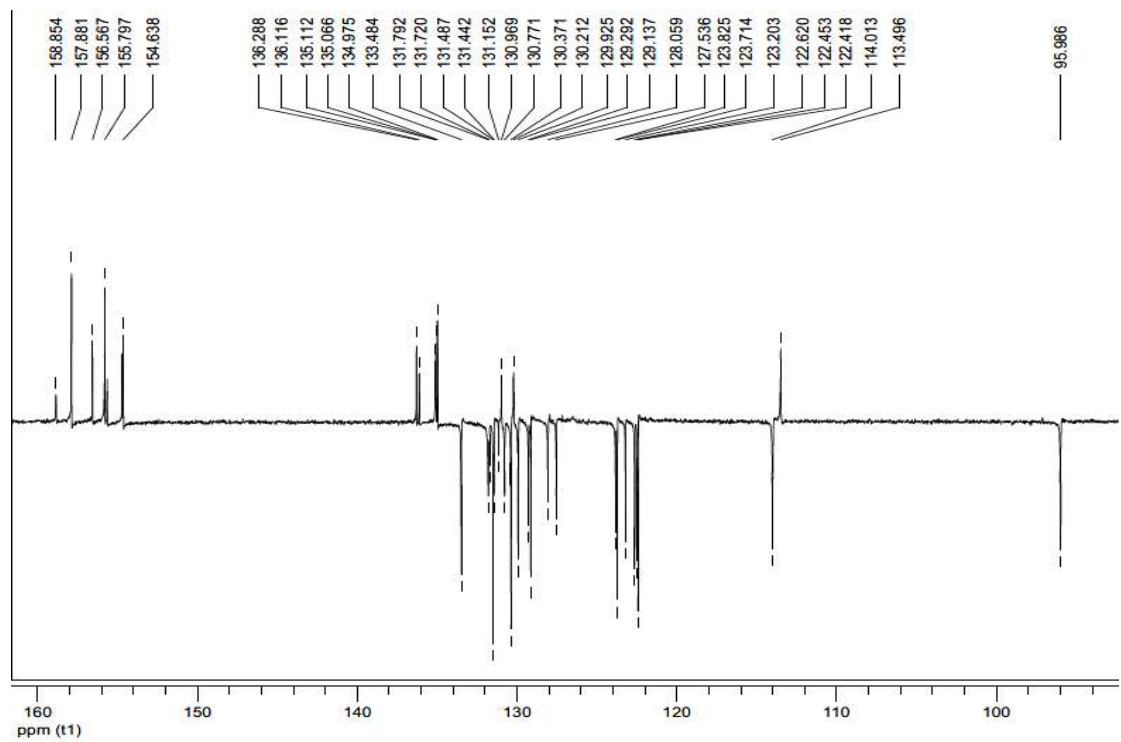

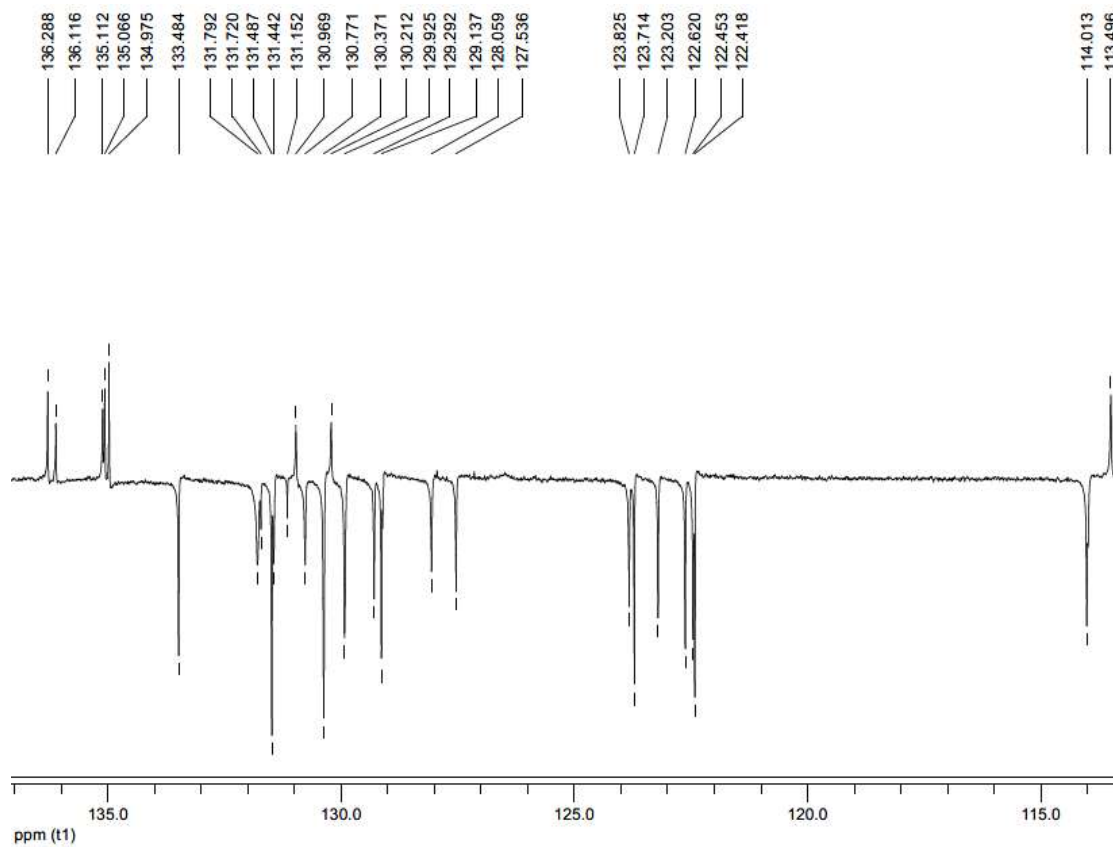

### Compound 31.

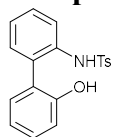

$\delta_H$  (500 MHz, CDCl<sub>3</sub>)

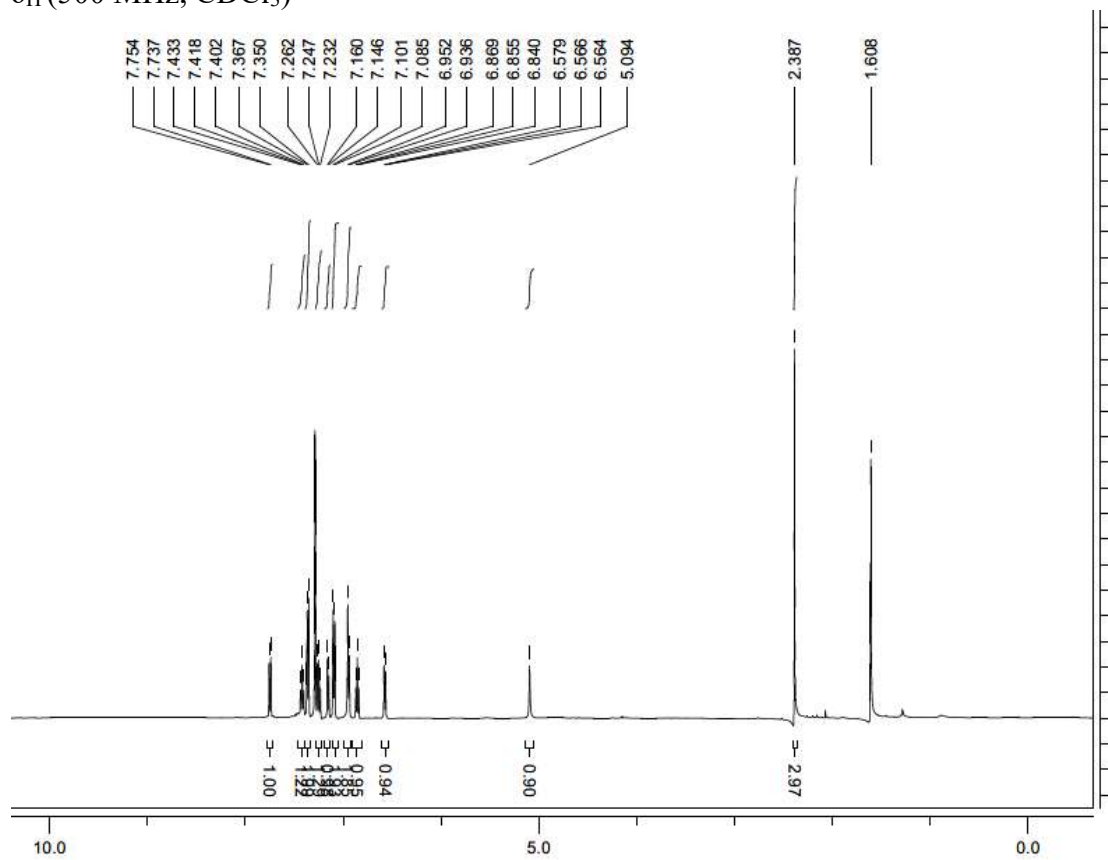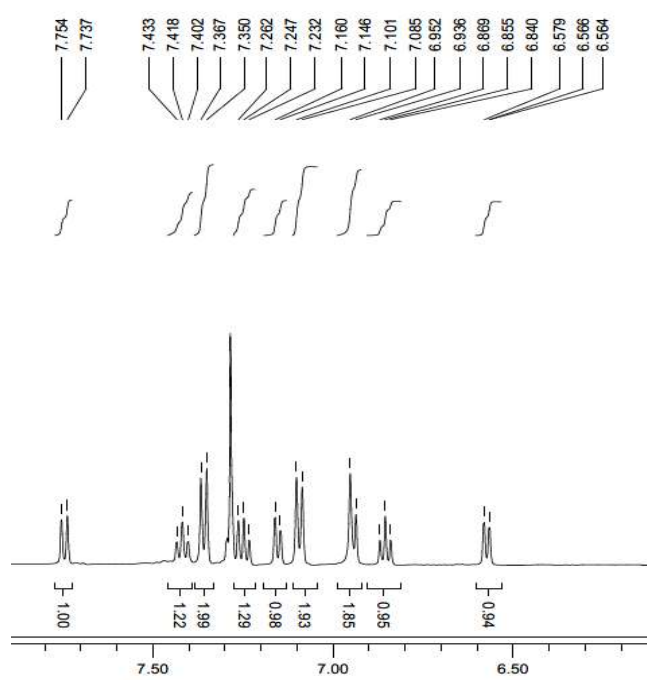

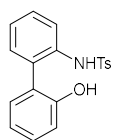

$\delta_C$  (126 MHz,  $CDCl_3$ )

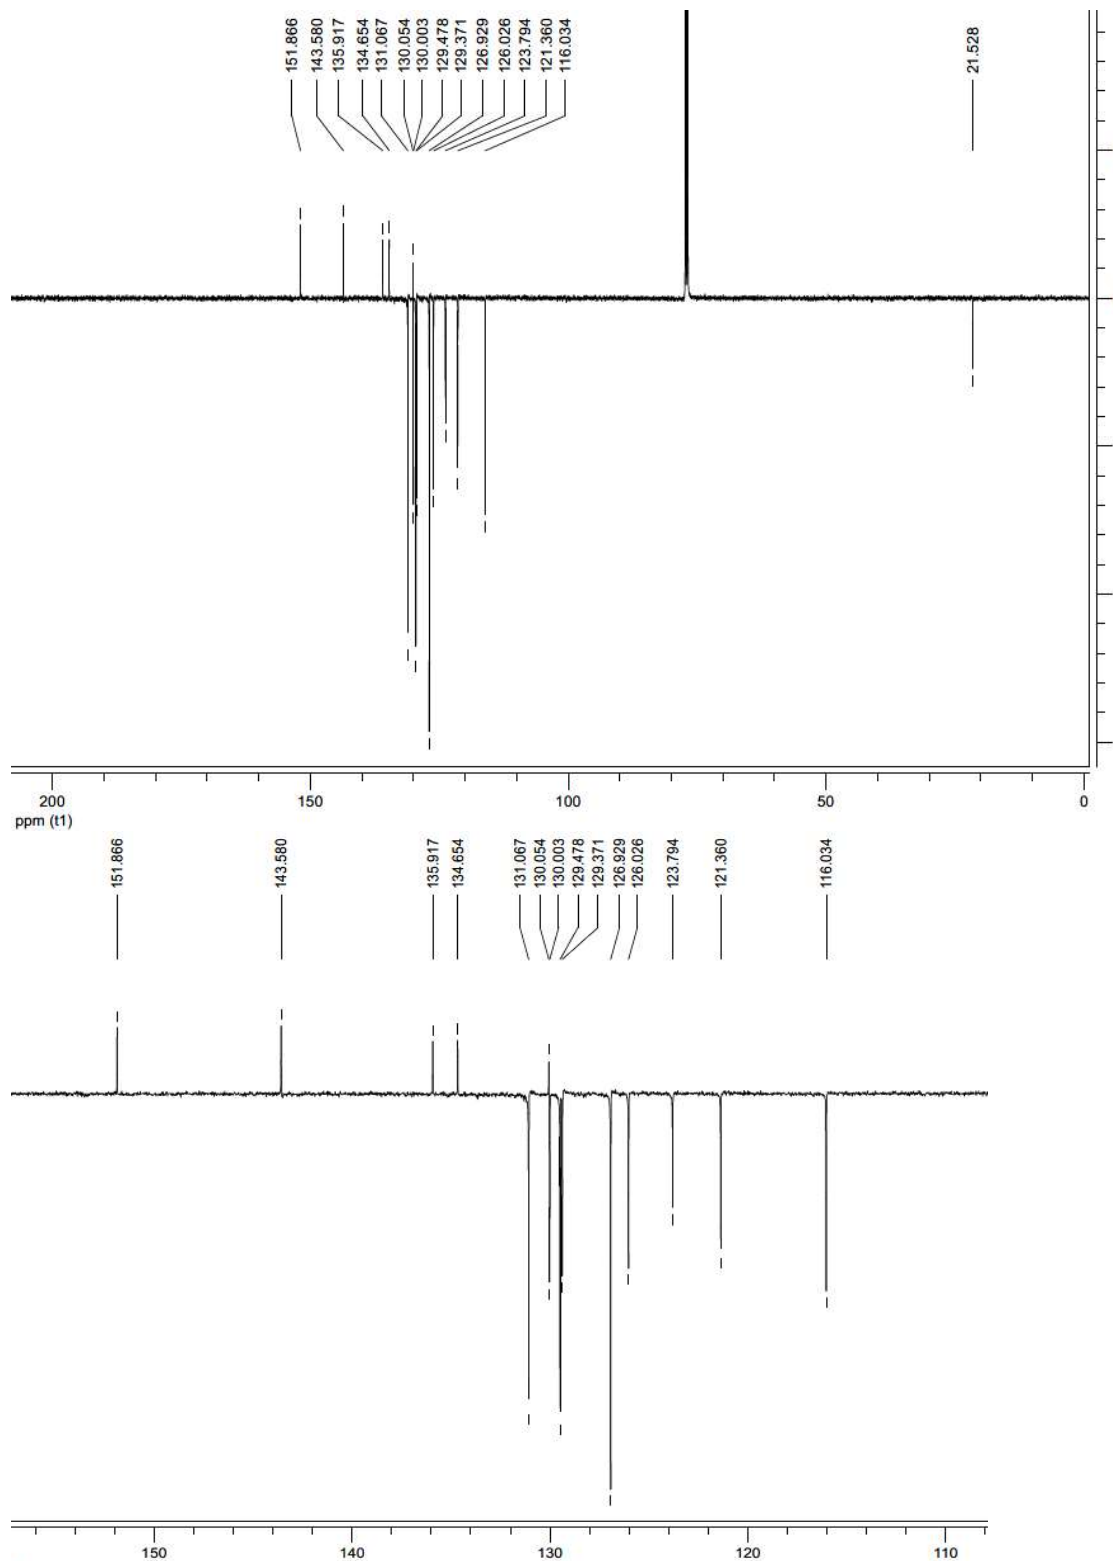

**Compound 29.**

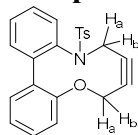

$\delta_H$  (500 MHz,  $CDCl_3$ )

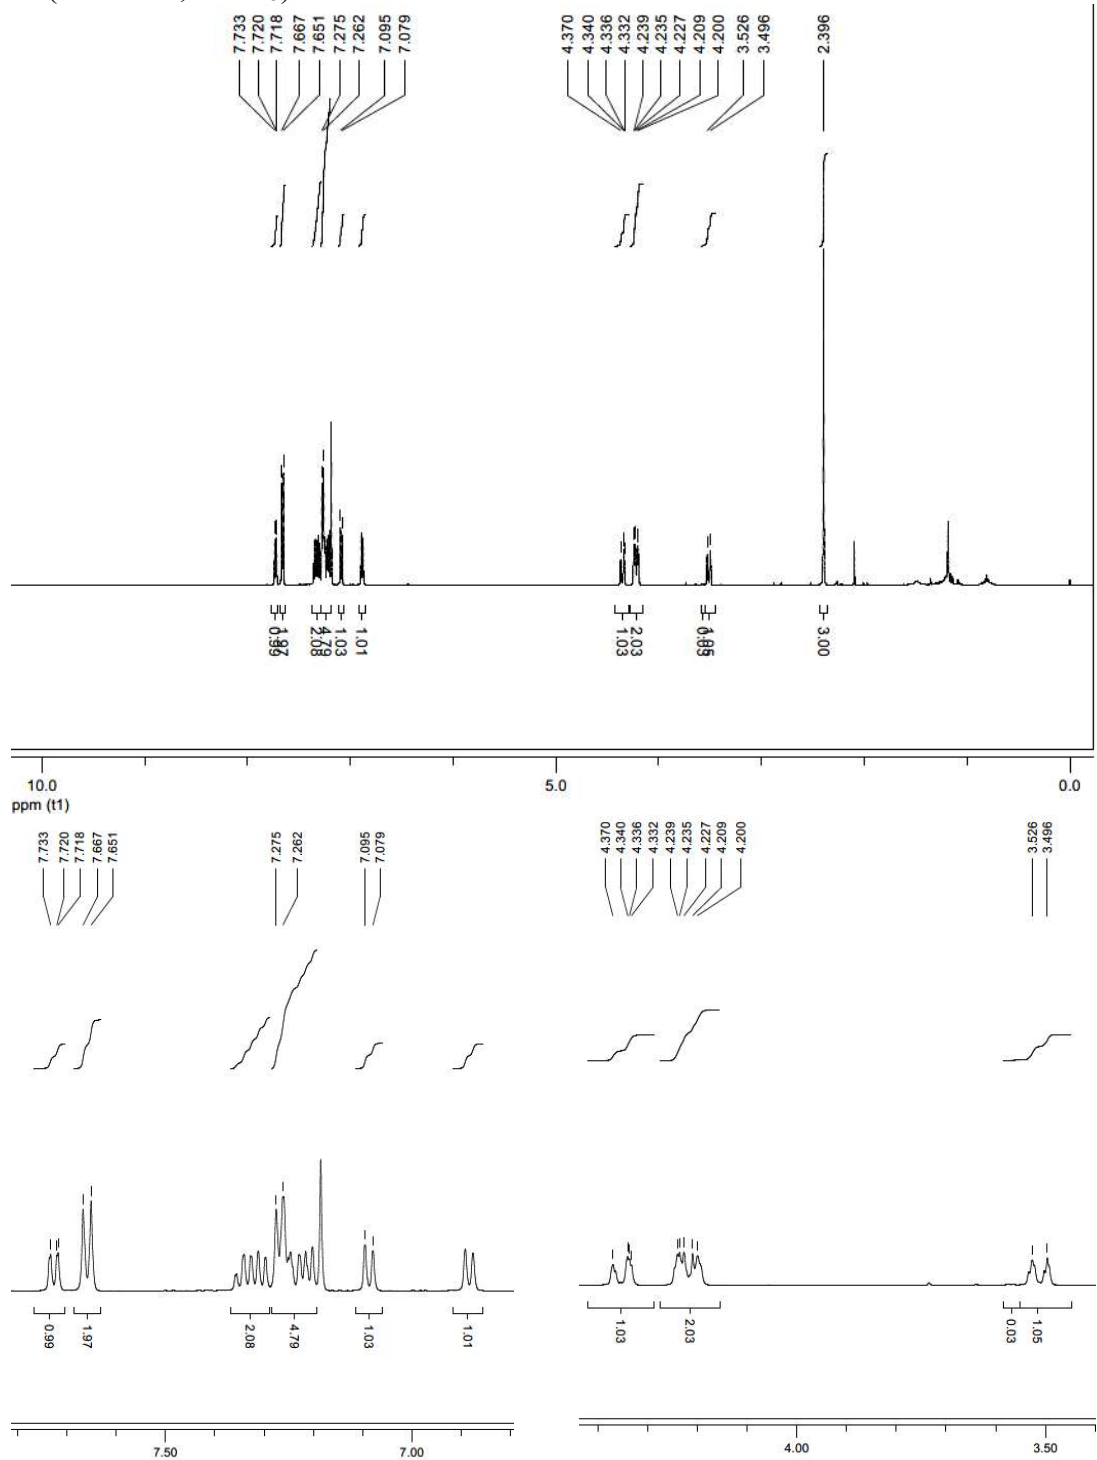



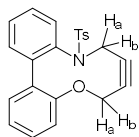

$\delta_C$  (126 MHz,  $CDCl_3$ )

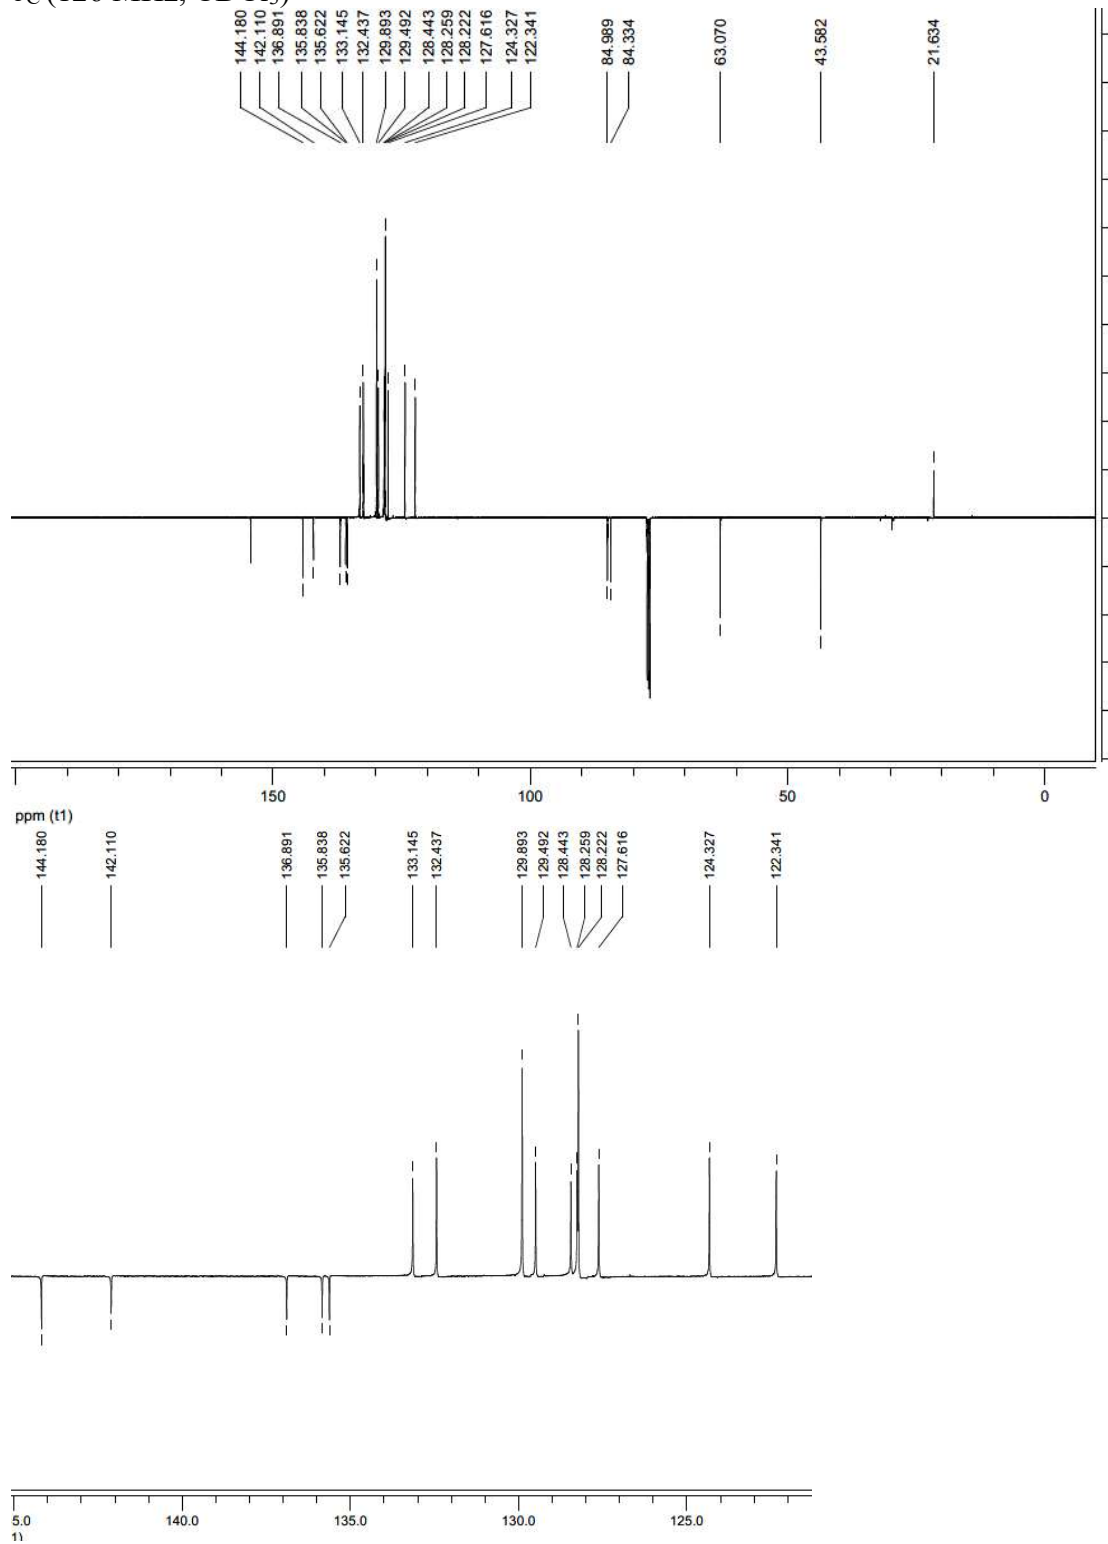



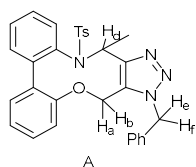

$\delta_C$  (126 MHz,  $CDCl_3$ )

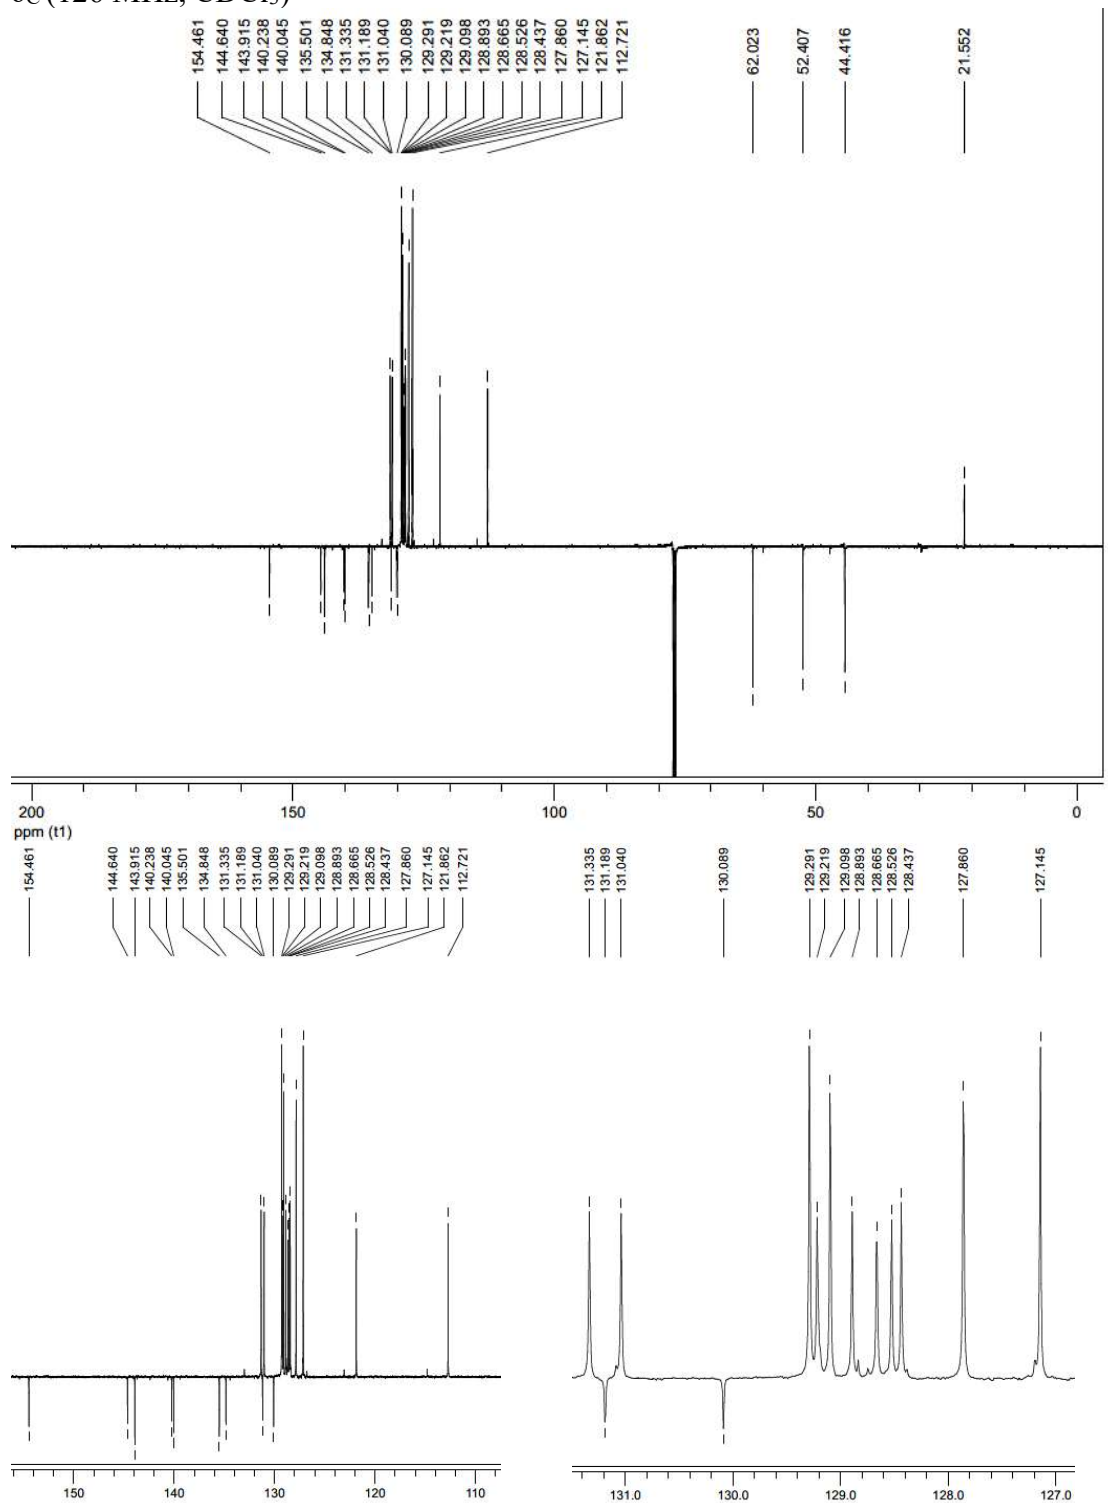

**Compound 29 azide adduct 32B.**

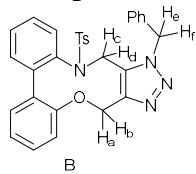

$\delta_H$  (500 MHz,  $CDCl_3$ )

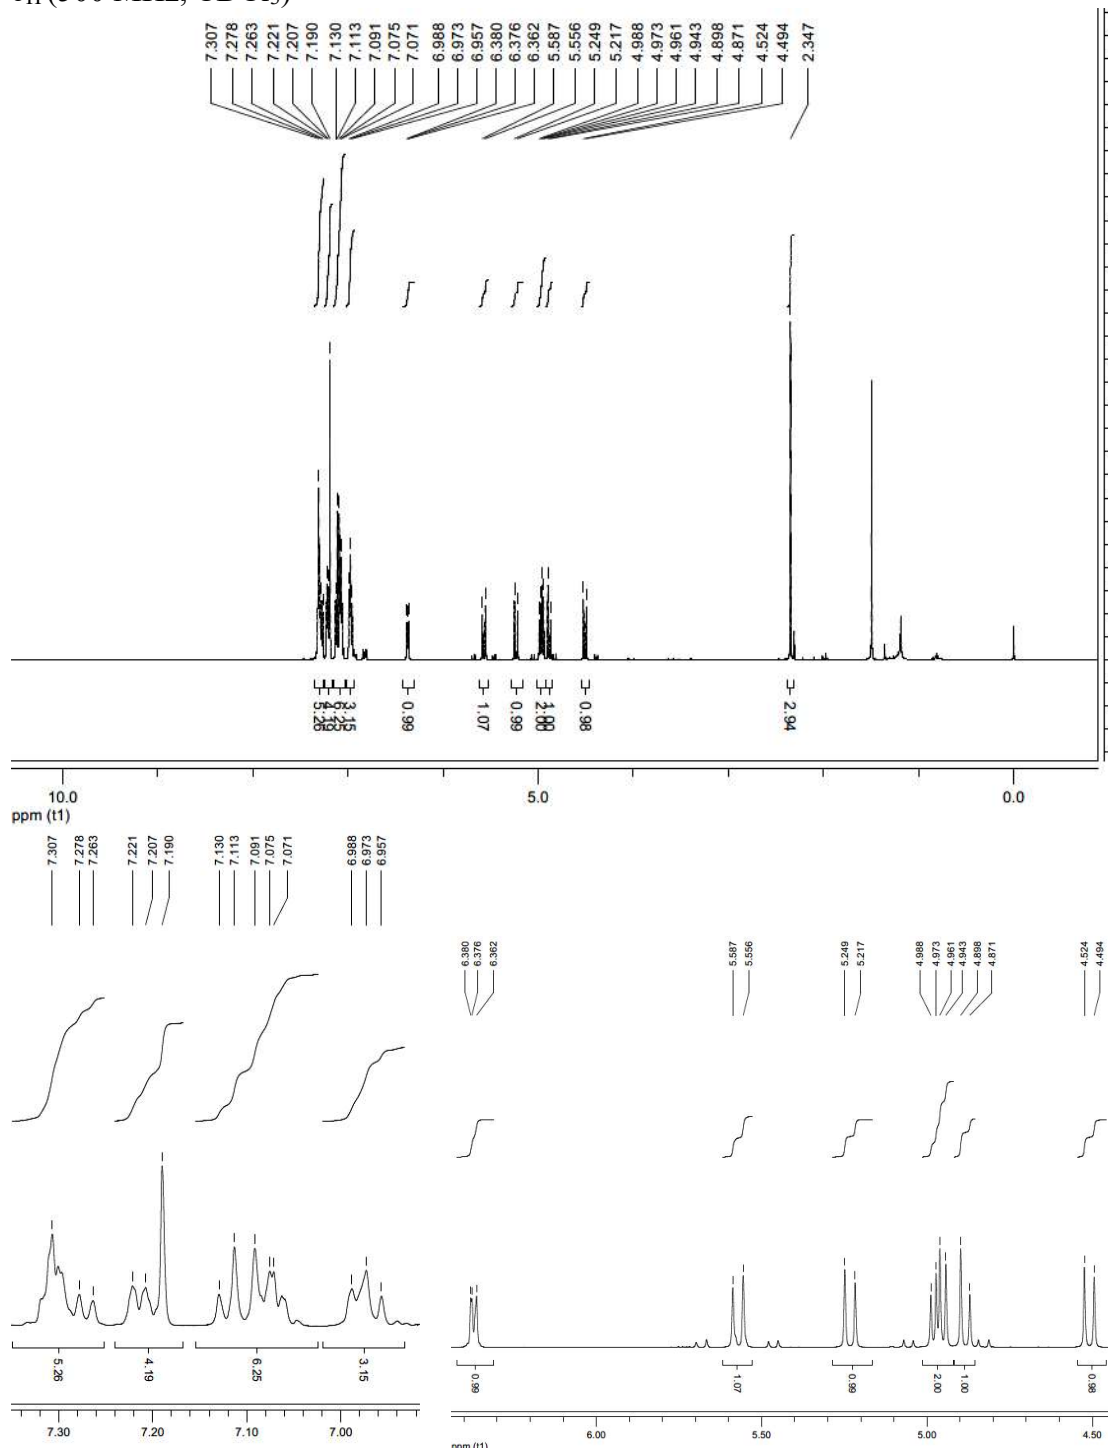

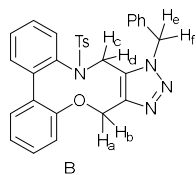

B  
 $\delta_C$  (126 MHz, CDCl<sub>3</sub>)

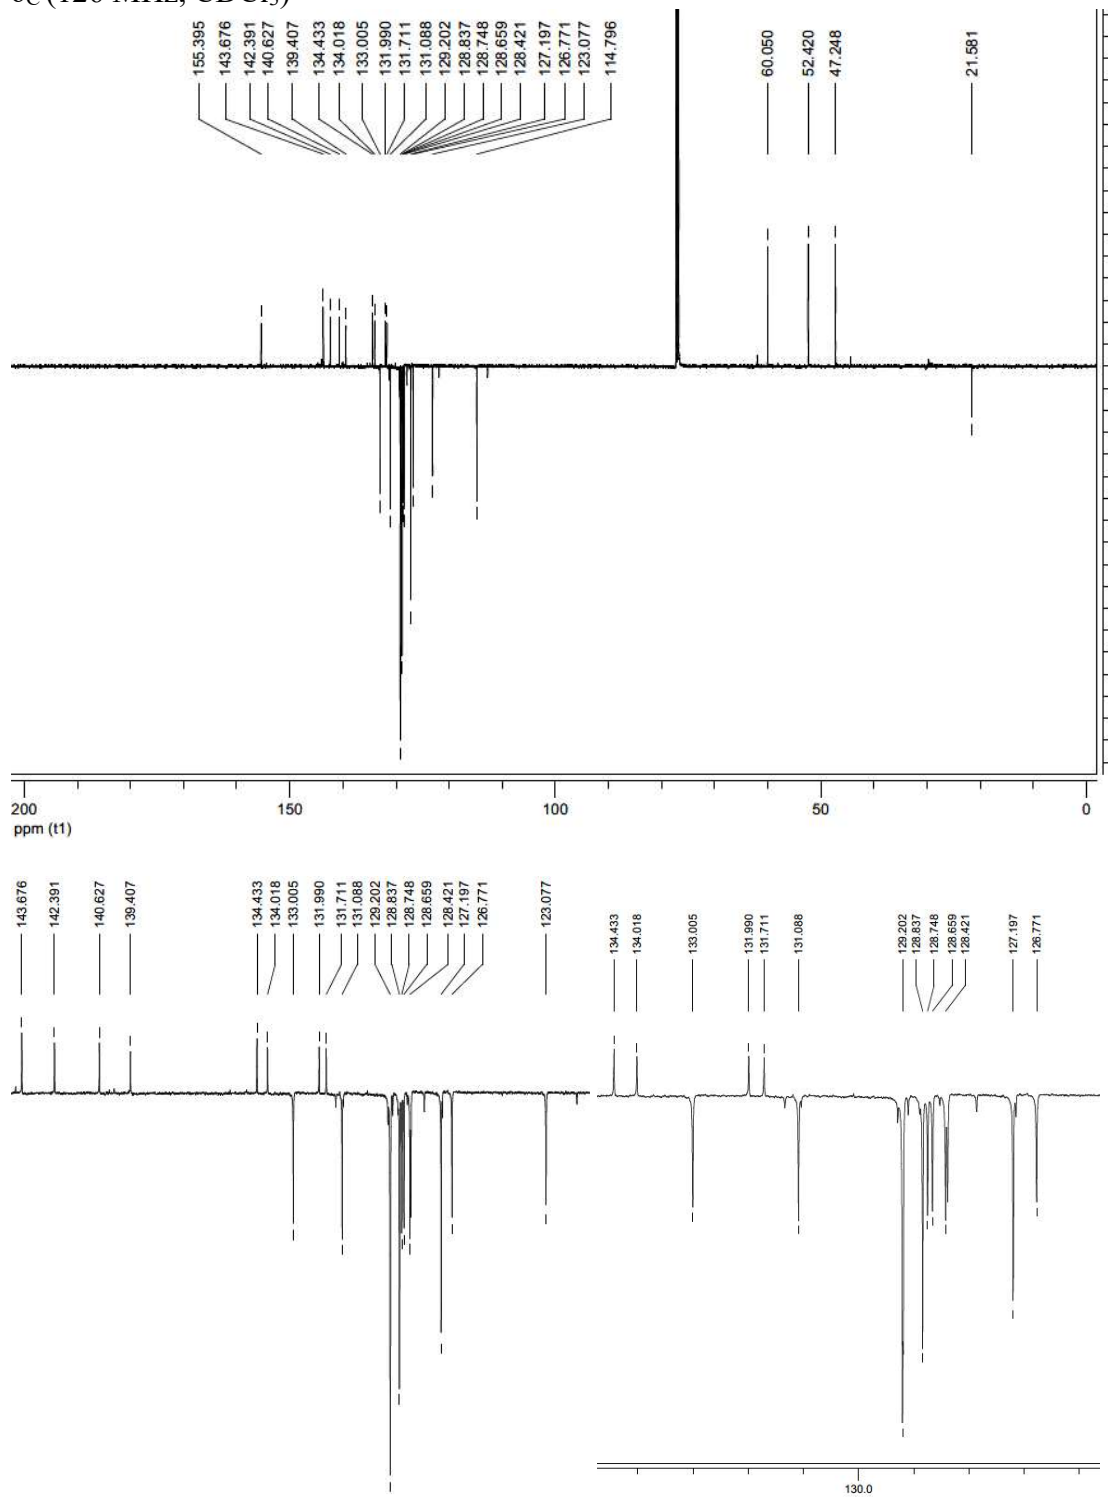

### Compound 37.

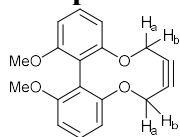

$\delta_H$  (500 MHz,  $CDCl_3$ )

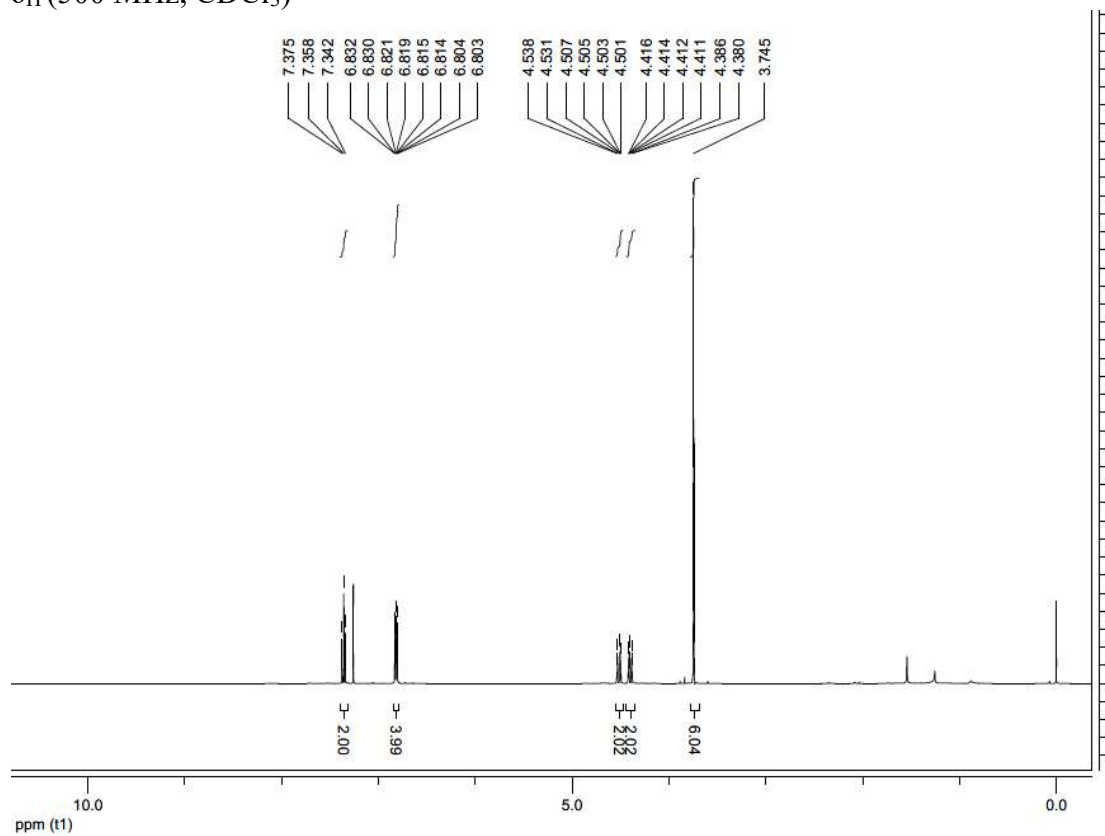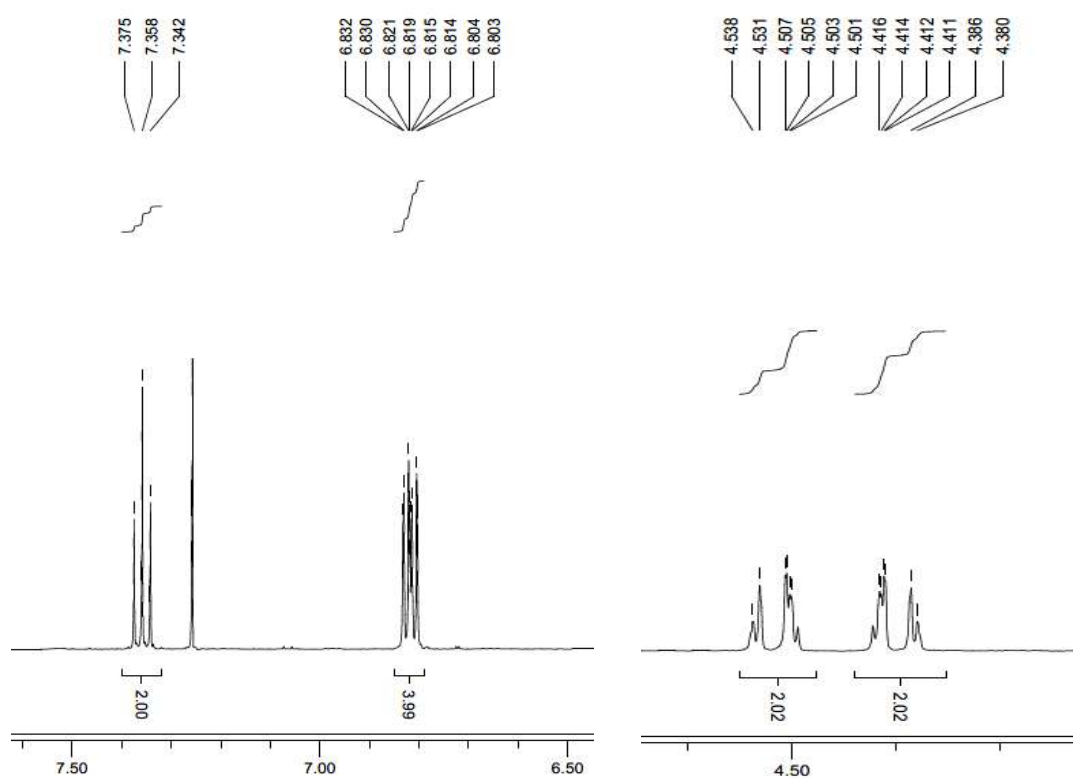

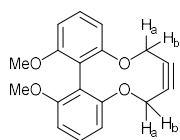

$\delta_C$  (126 MHz,  $CDCl_3$ )

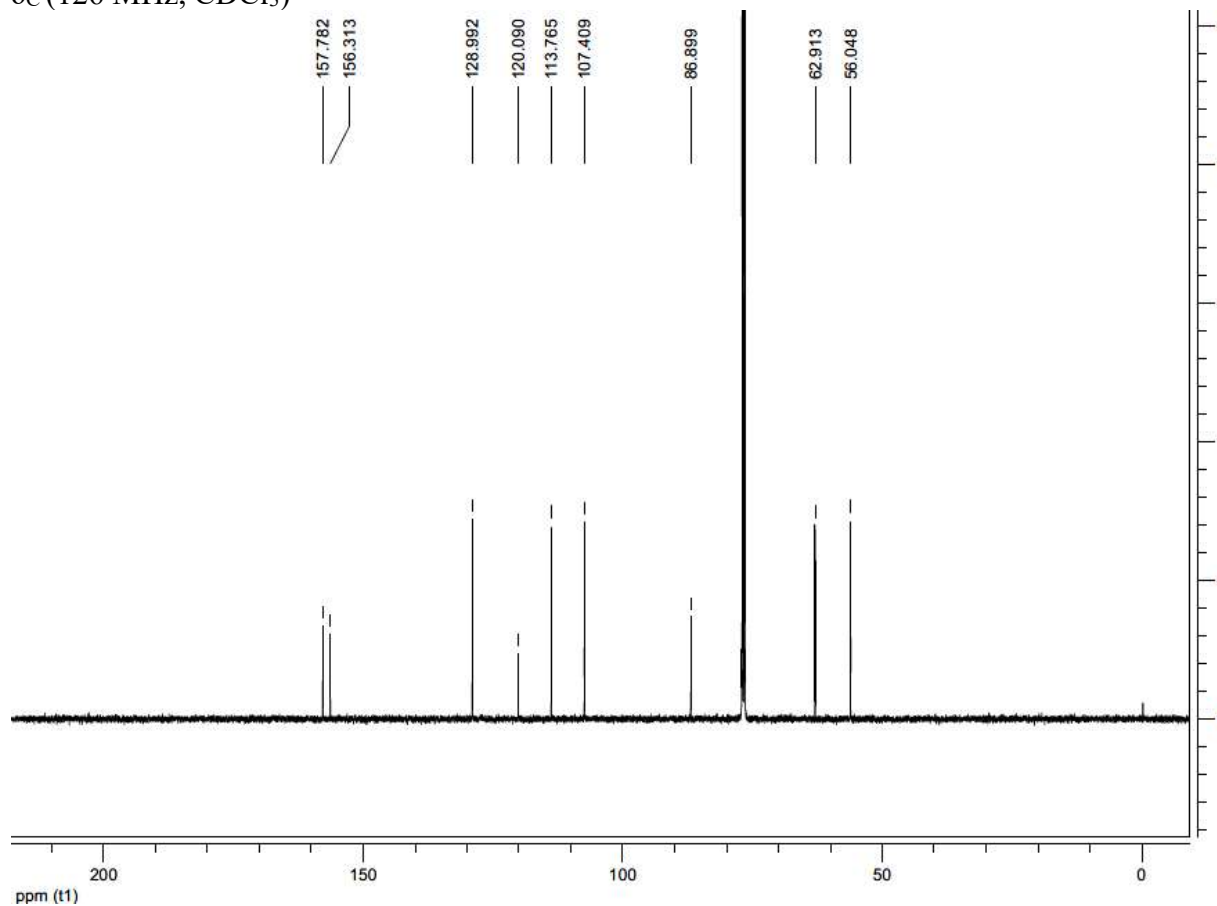

**Compound 37 azide adduct 38.**

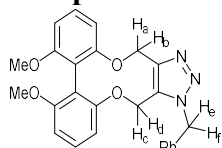

$\delta_H$  (500 MHz,  $CDCl_3$ )

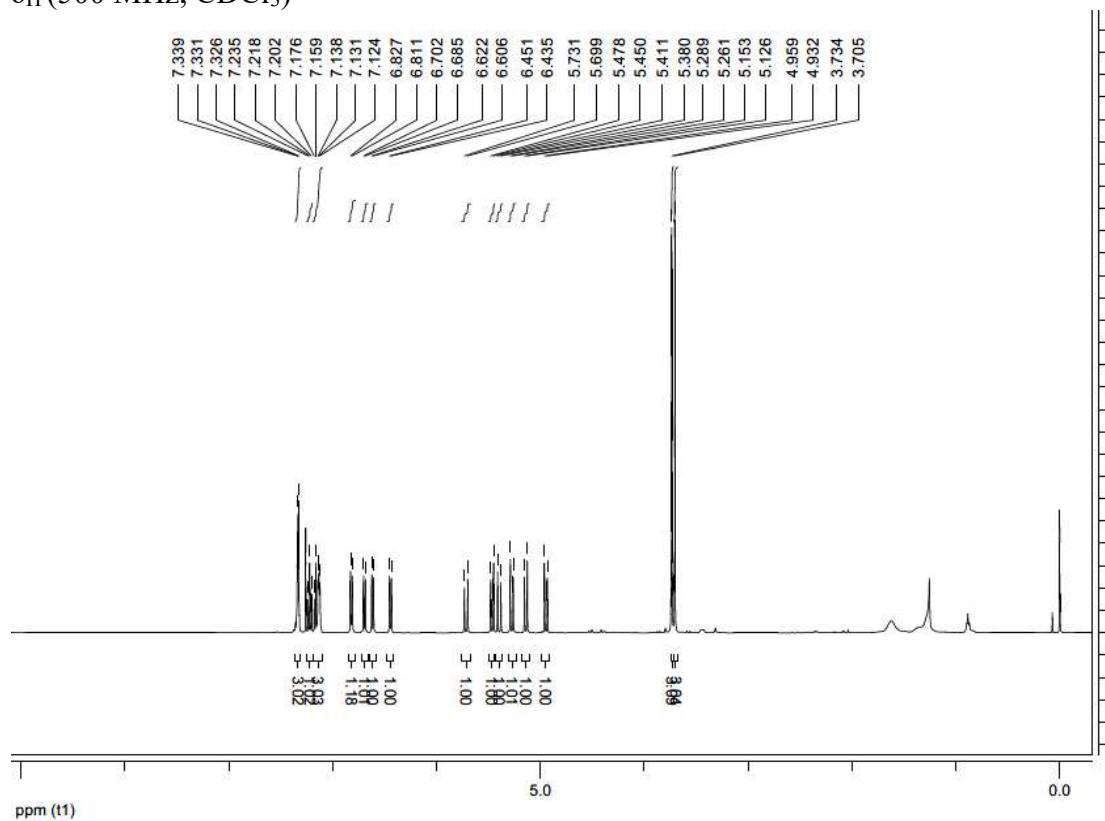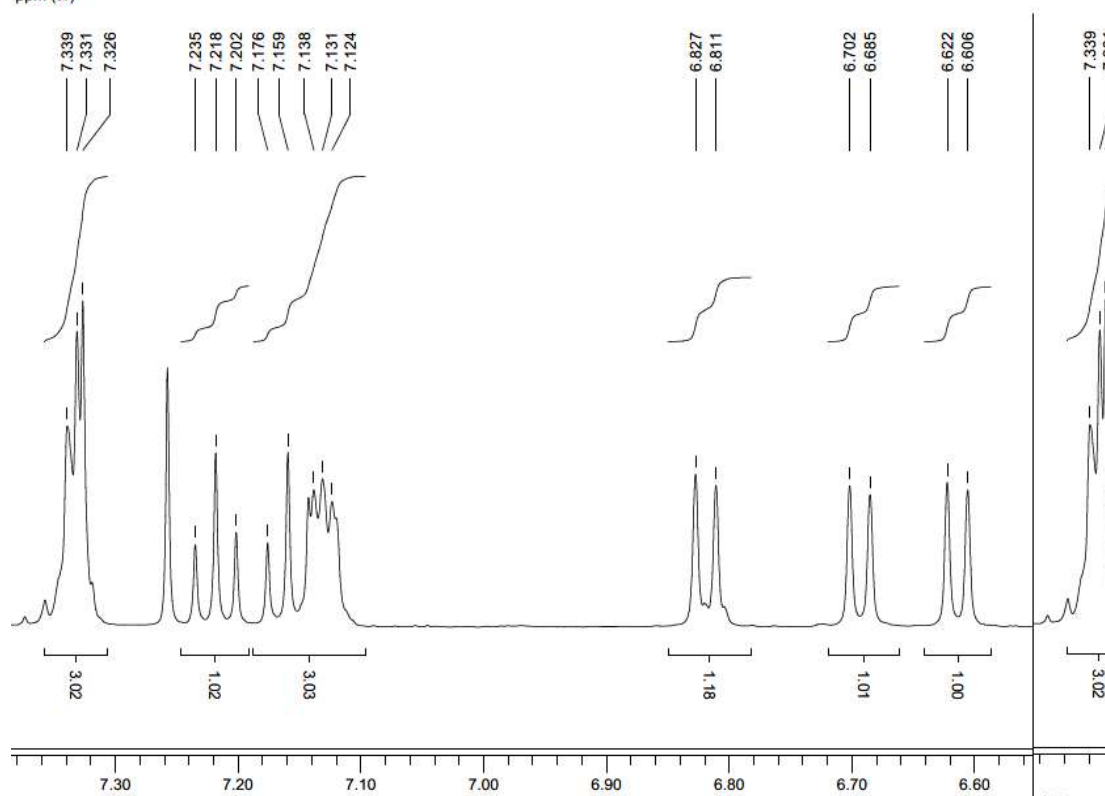



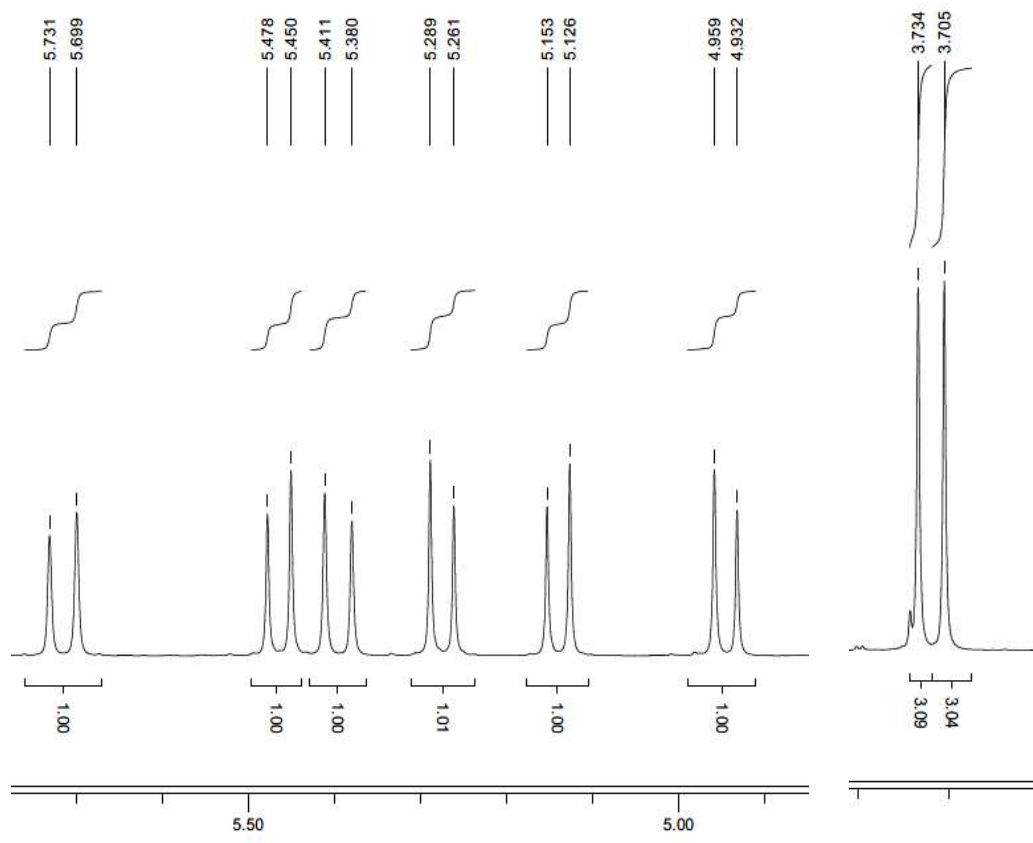

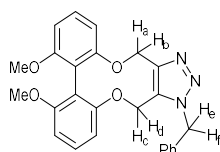

$\delta_C$  (126 MHz,  $CDCl_3$ )

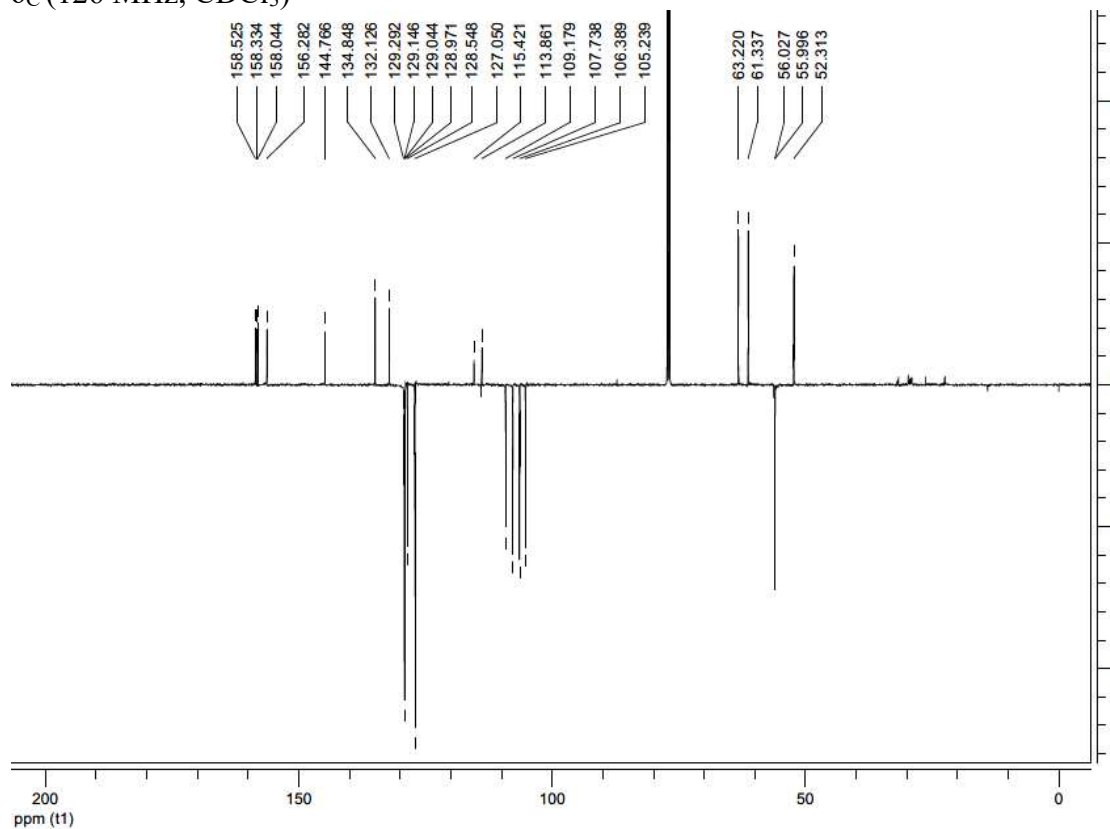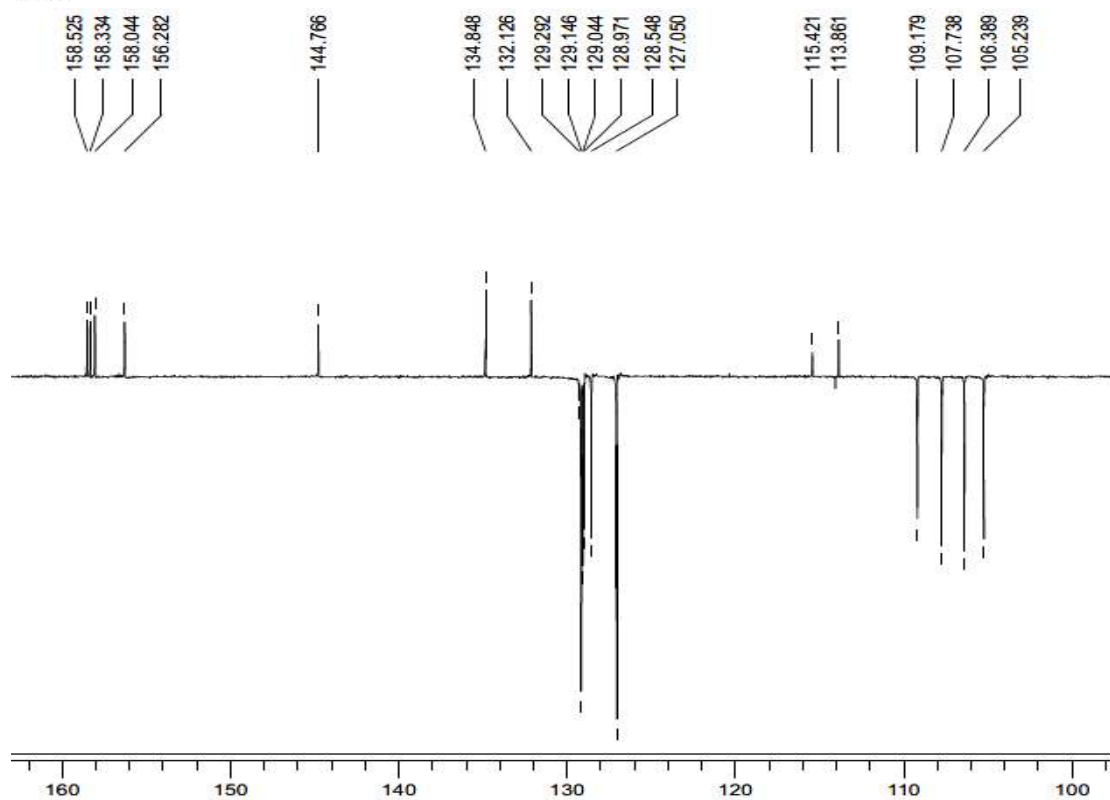

# Compound 42.

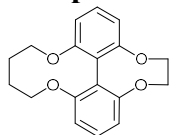

$\delta_H$  (500 MHz,  $CDCl_3$ )

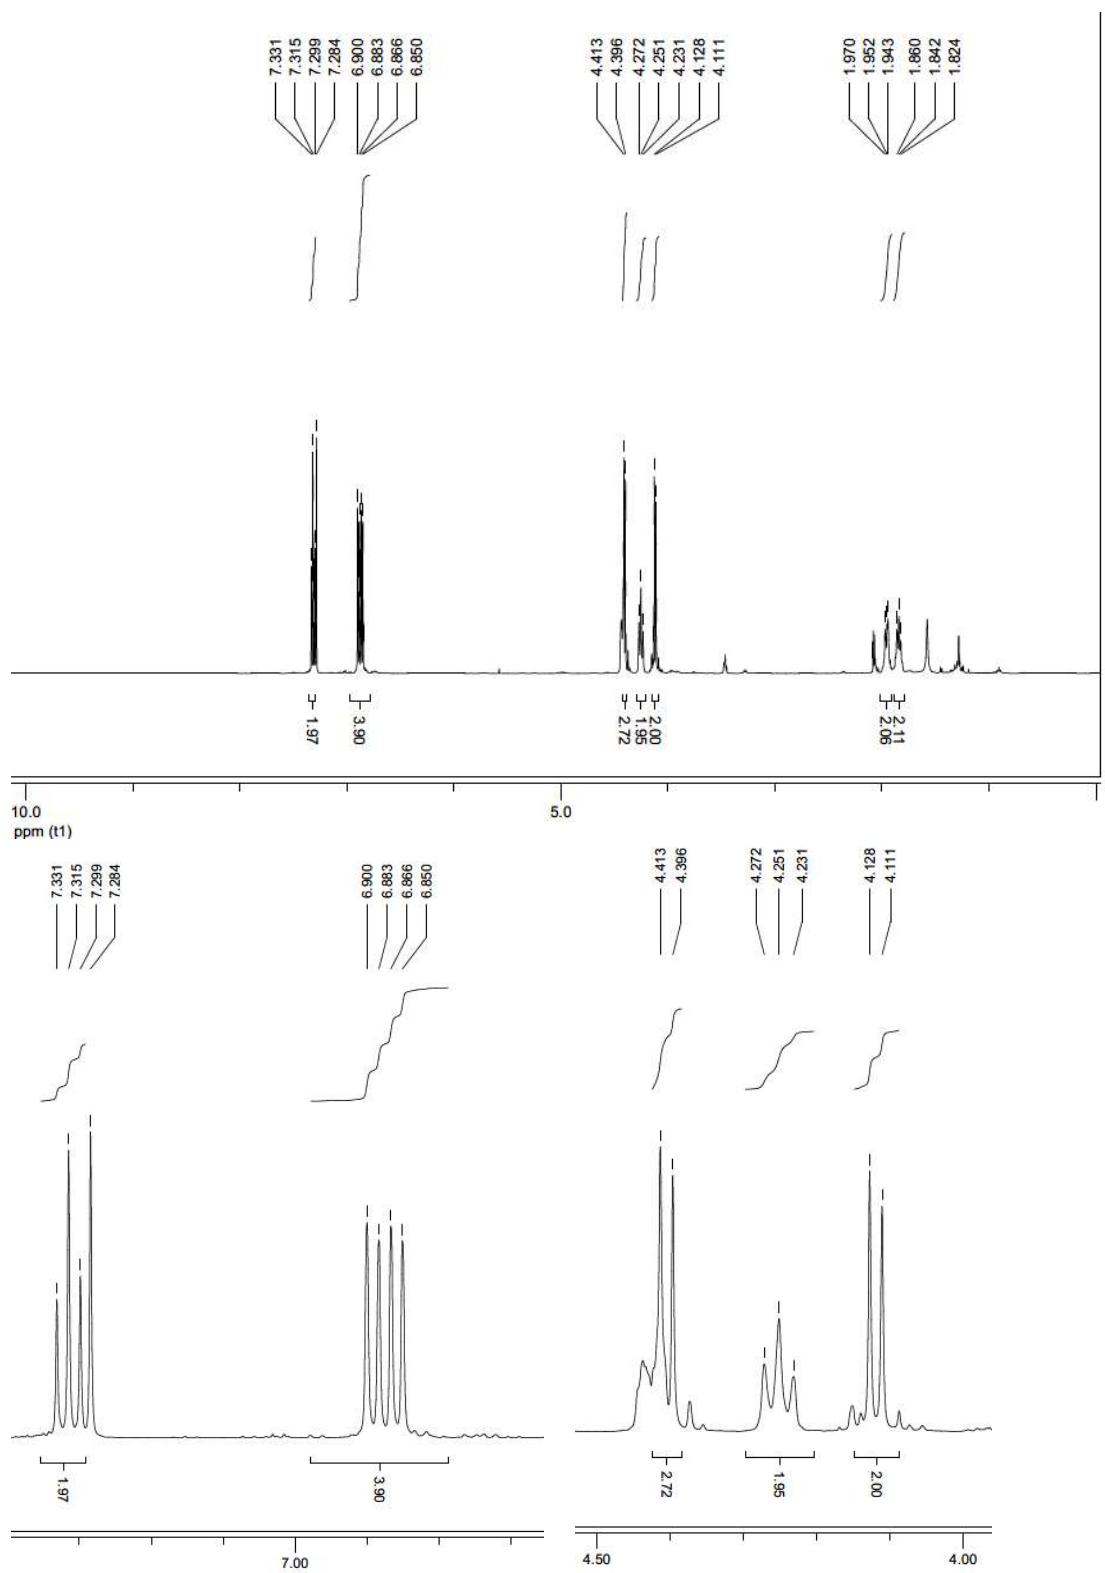

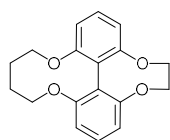

$\delta_C$  (126 MHz,  $CDCl_3$ )

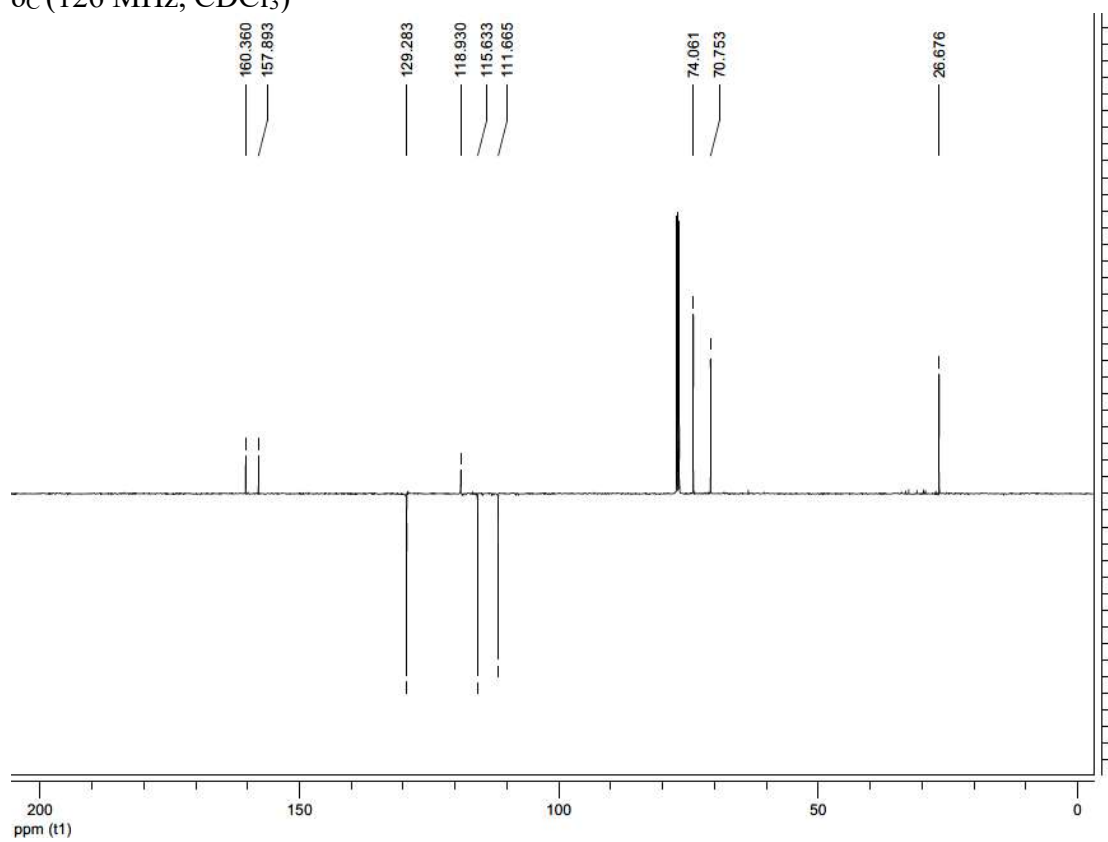

### Compound 44.

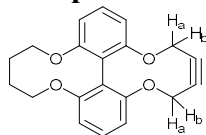

$\delta_H$  (500 MHz,  $CDCl_3$ )

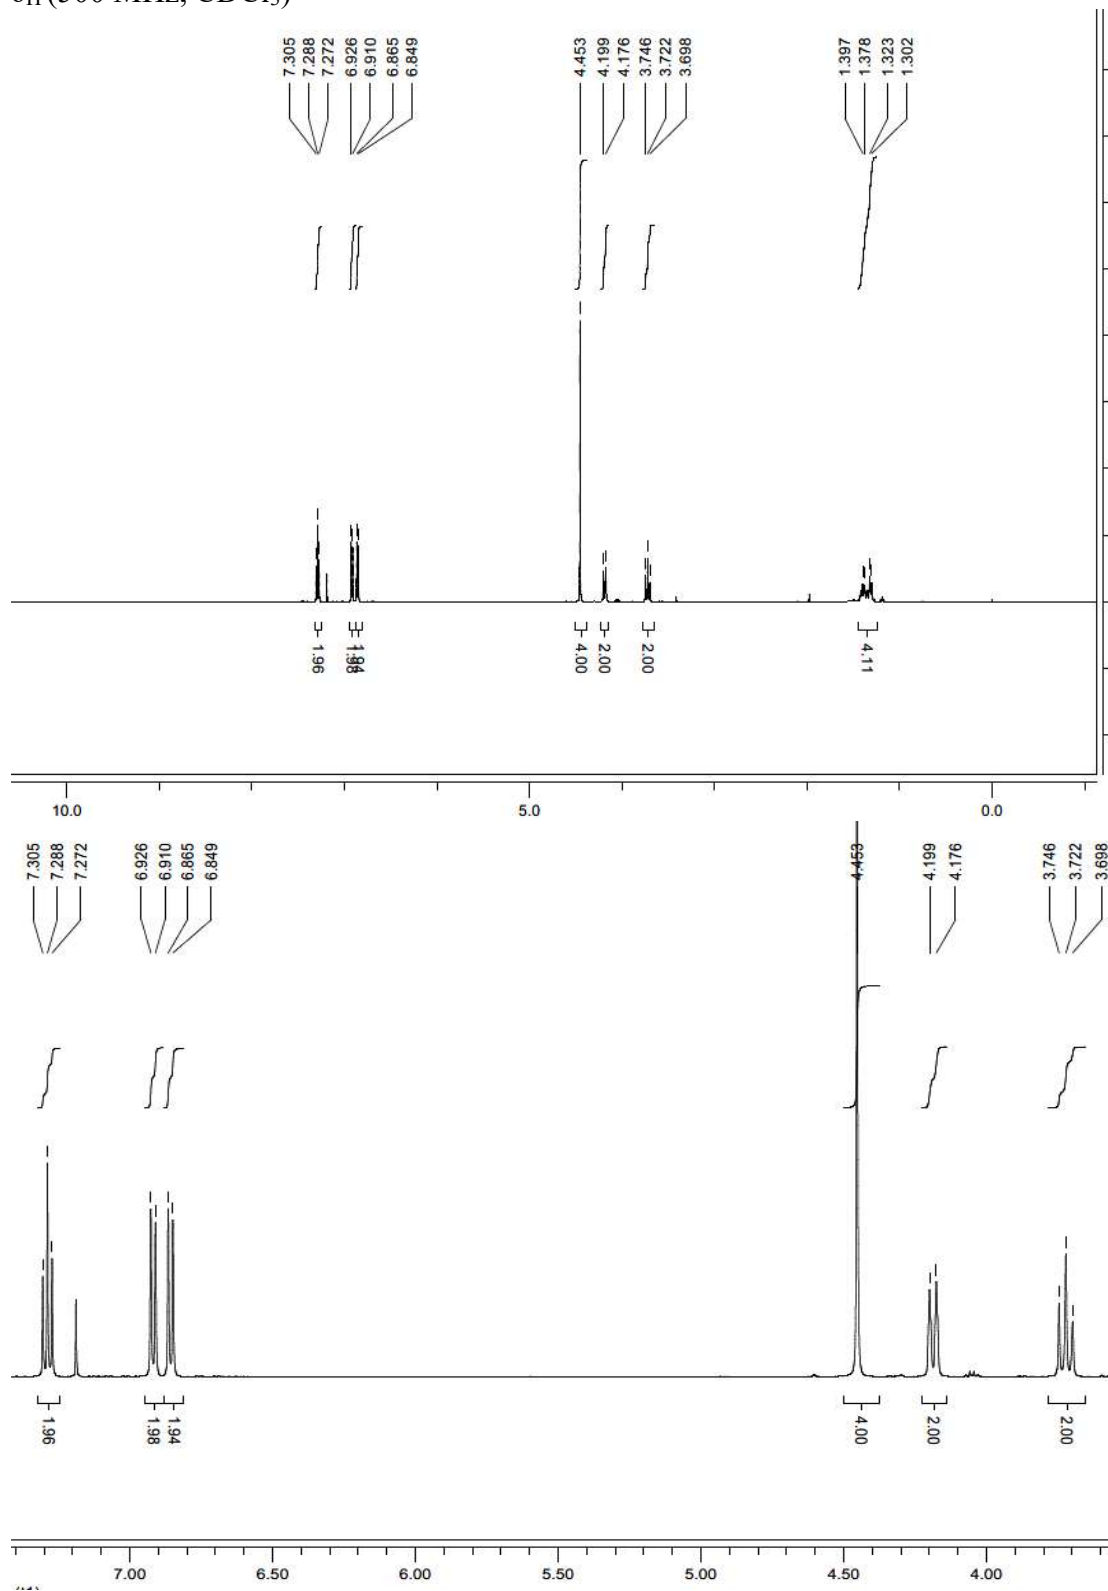



**Compound 45.**

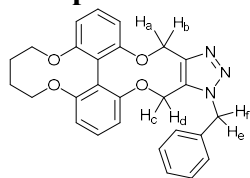

$\delta_H$  (500 MHz,  $CDCl_3$ )

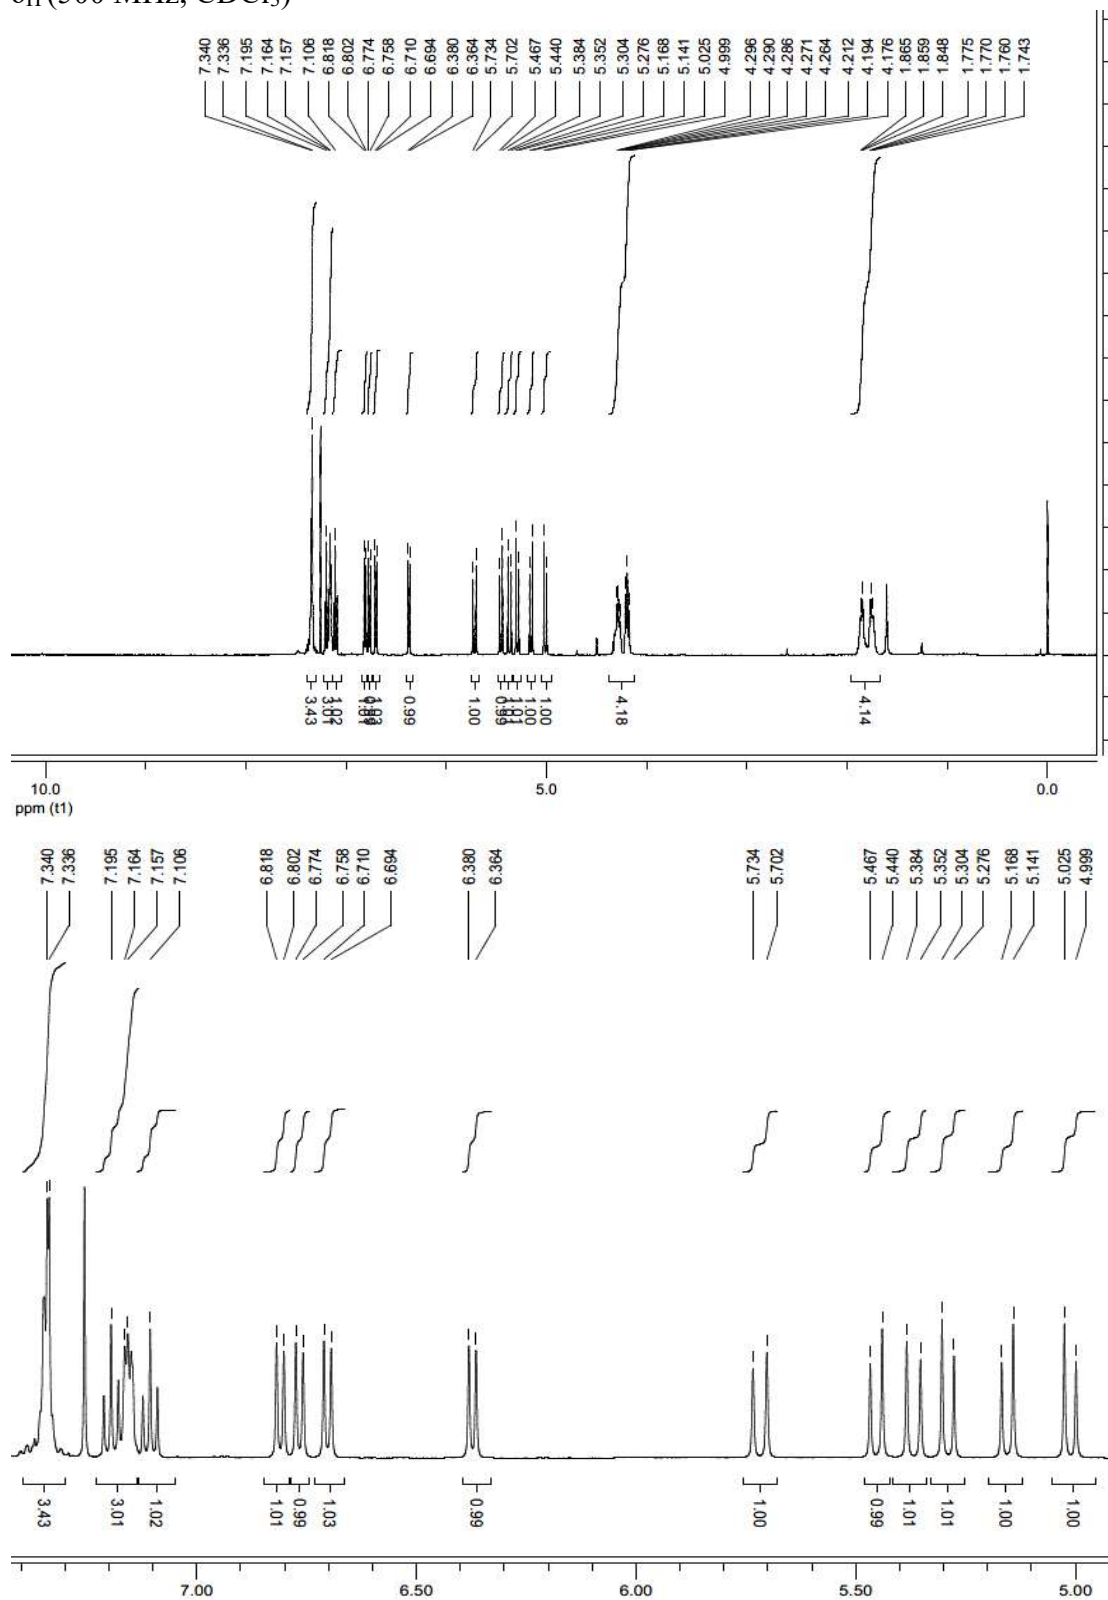

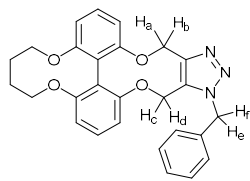

$\delta_C$  (126 MHz,  $CDCl_3$ )

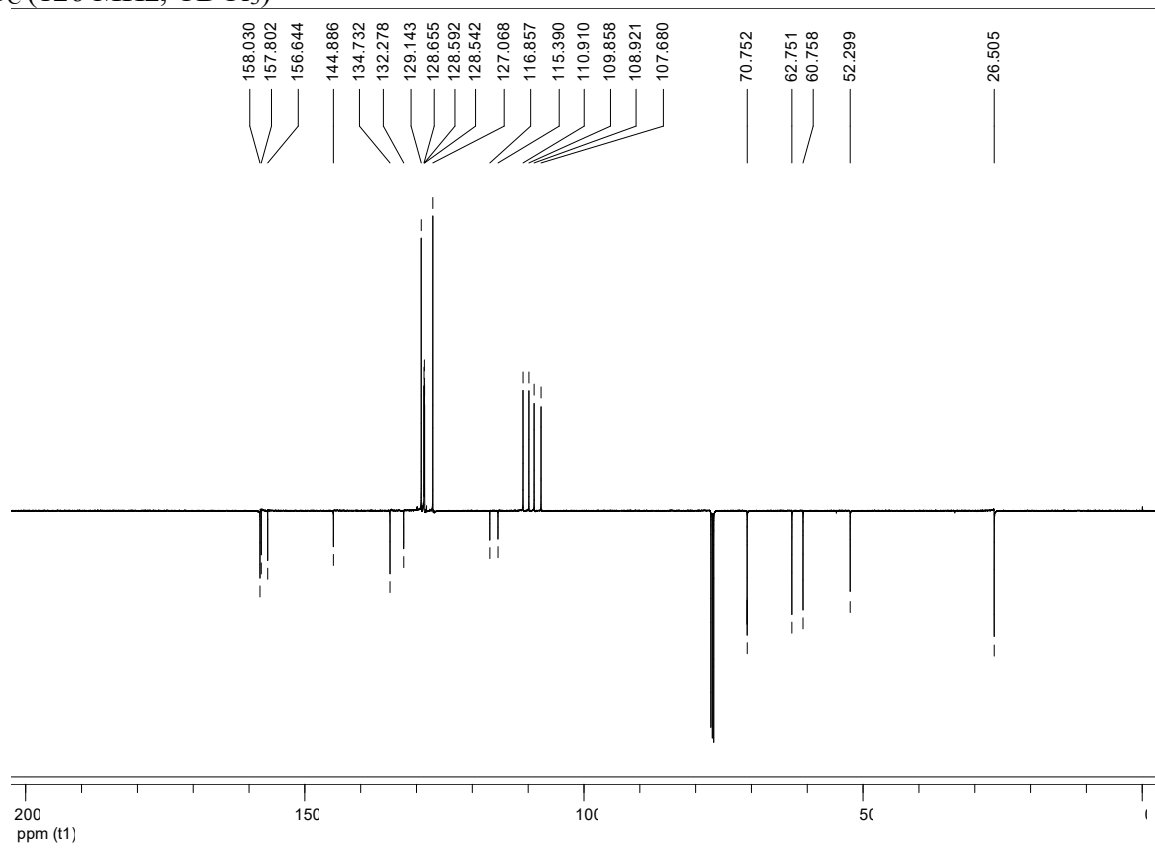



### Compound 47.

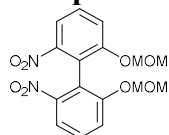

$\delta_H$  (500 MHz,  $CDCl_3$ )

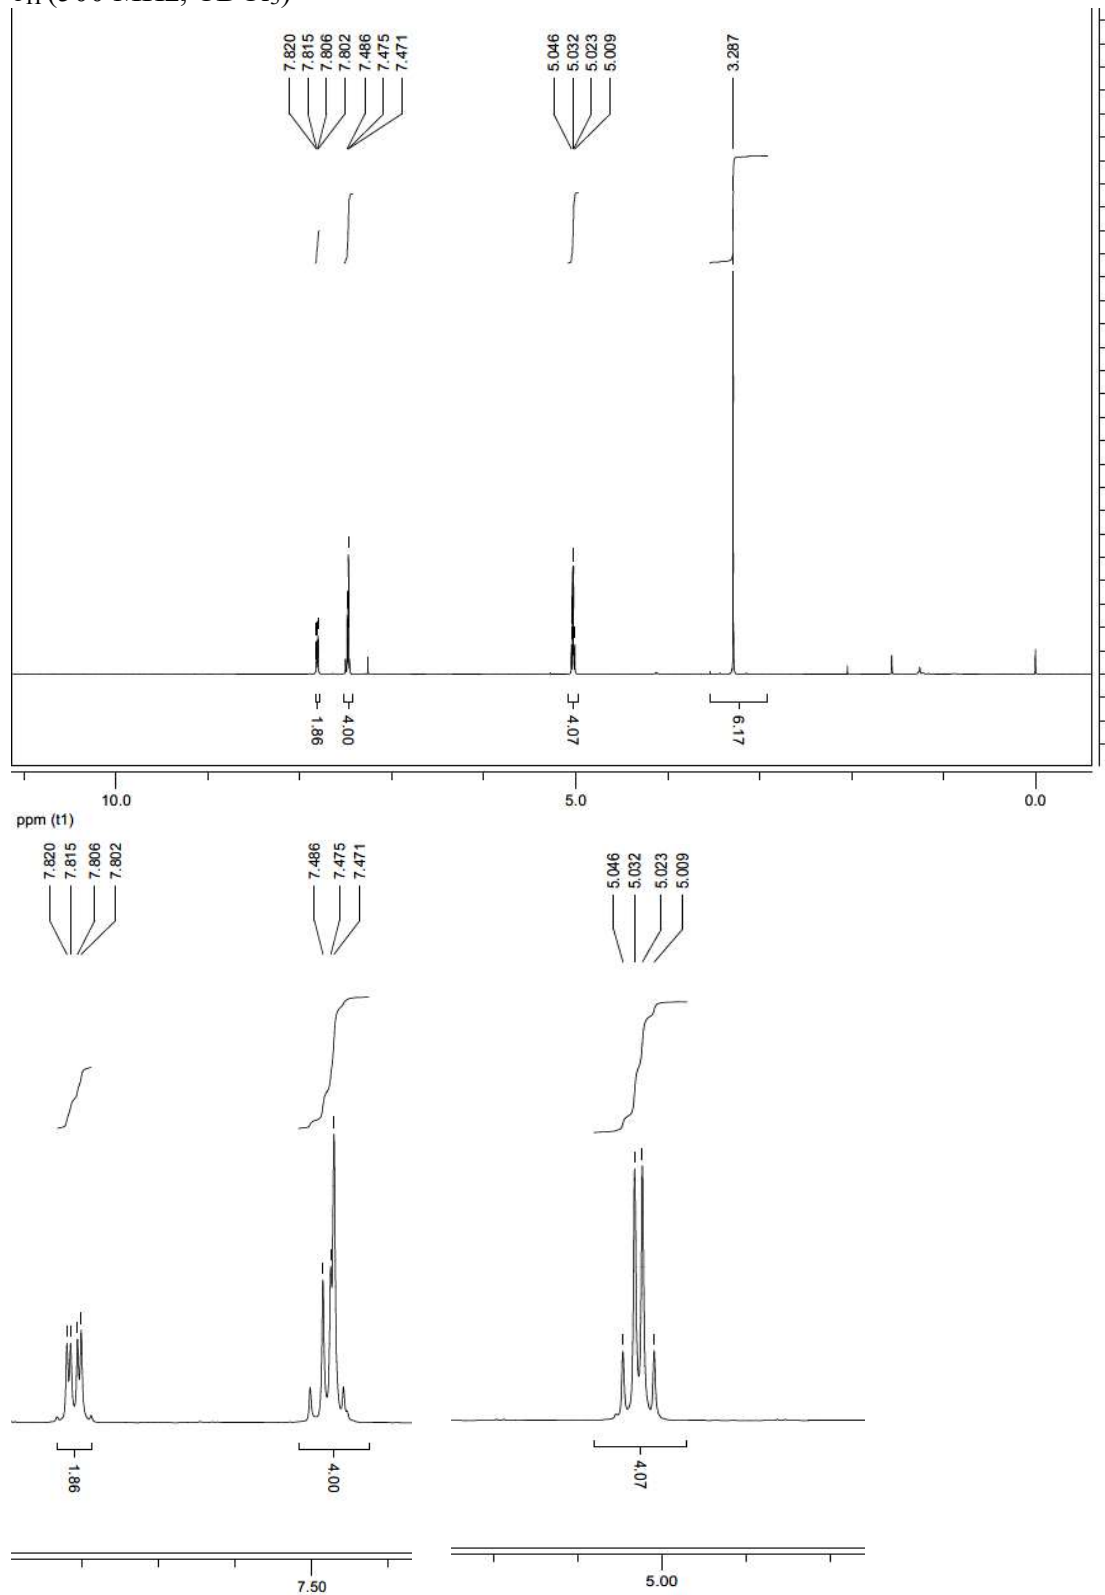

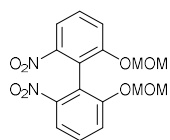

$\delta_C$  (126 MHz,  $CDCl_3$ )

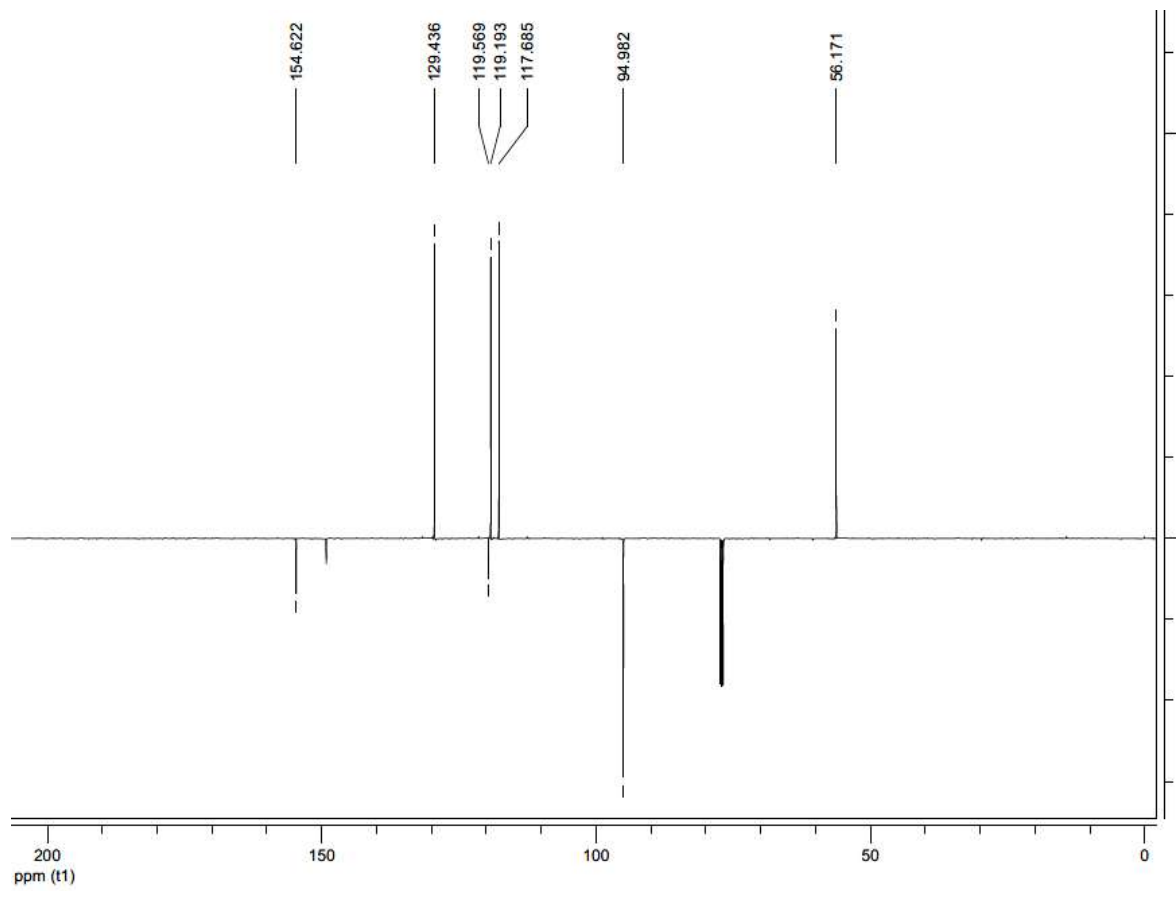

### Compound 48.

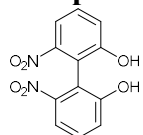

$\delta_H$  (500 MHz, CD<sub>3</sub>CN)

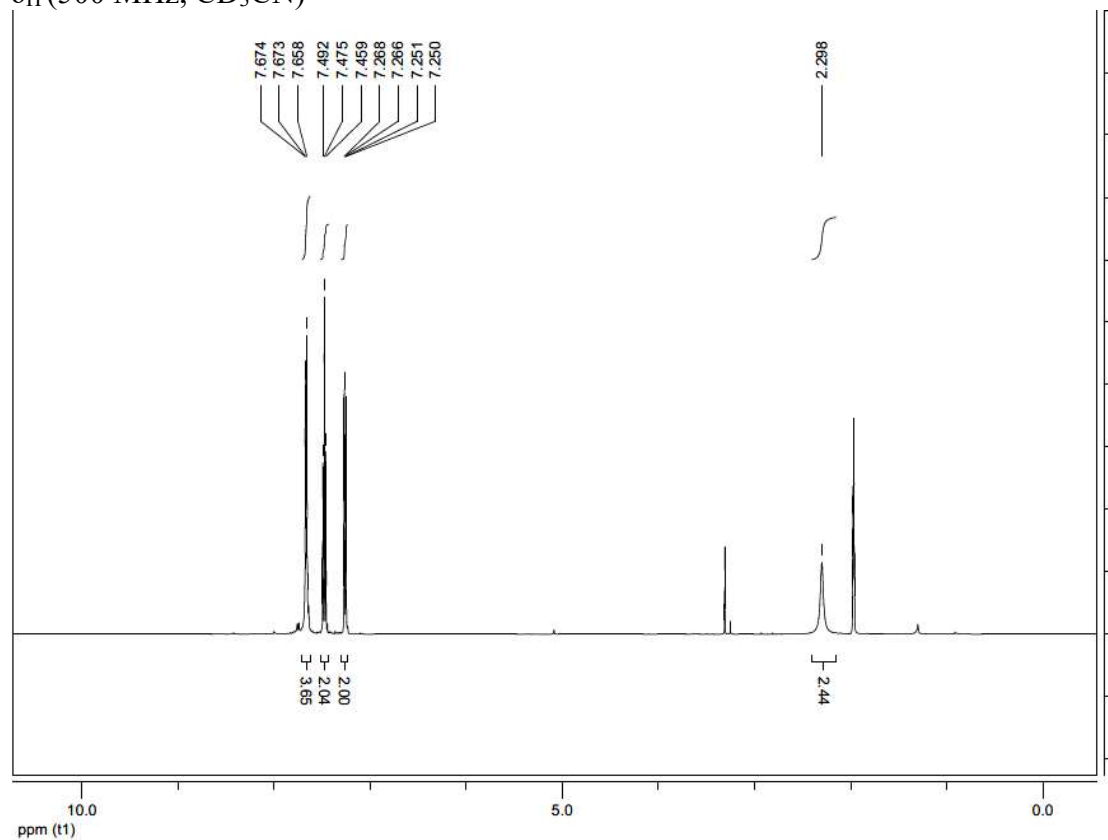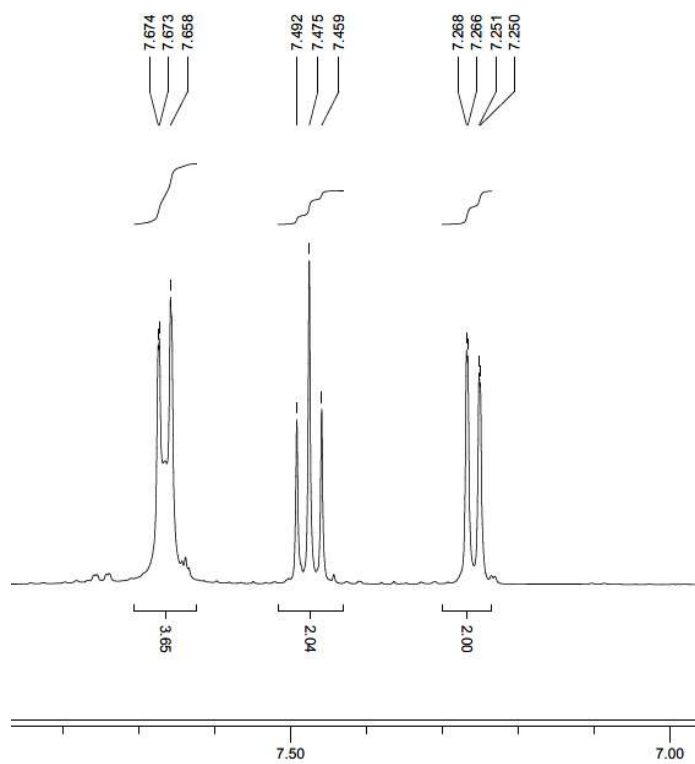

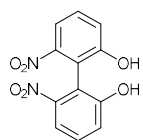

$\delta_C$  (126 MHz, CD<sub>3</sub>CN)

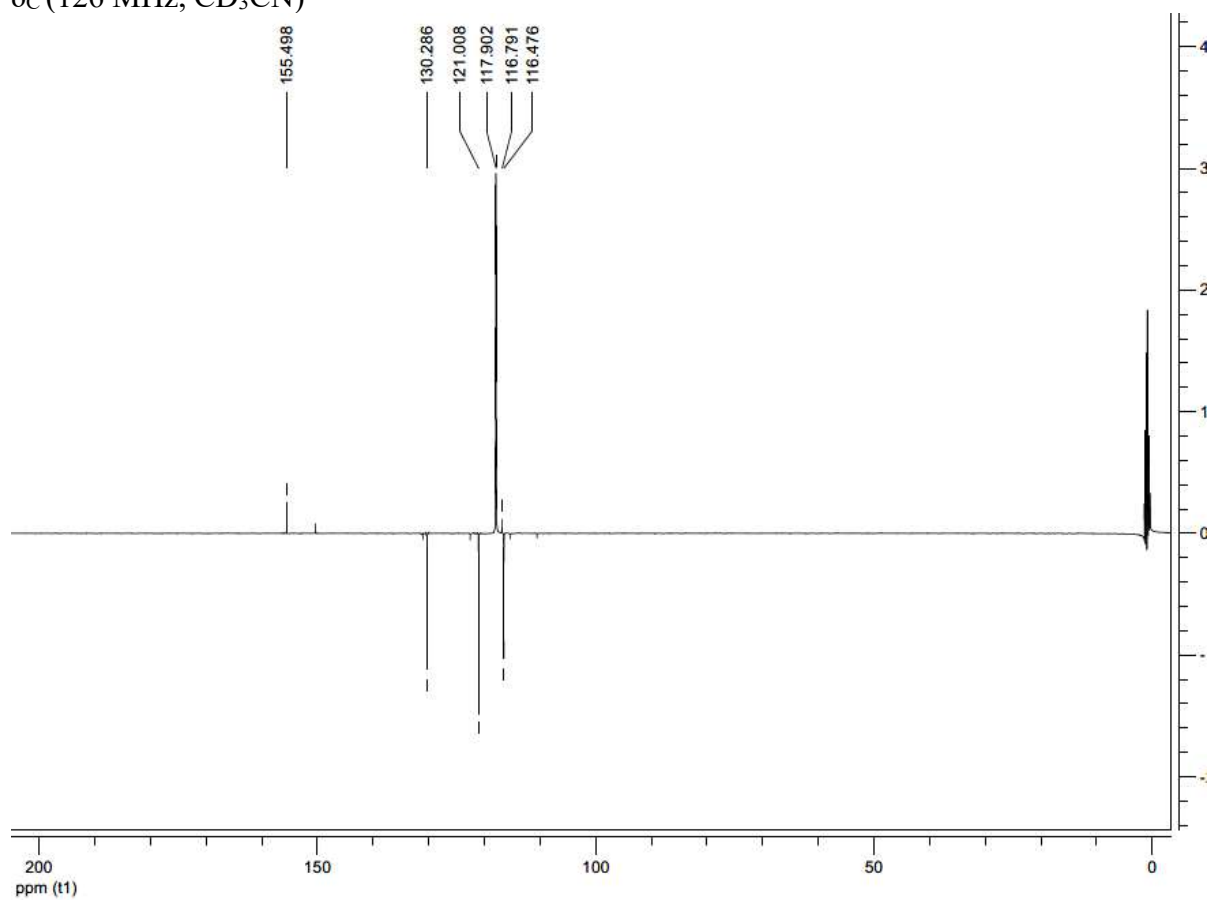

### Compound 49.

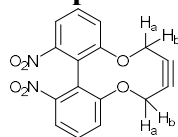

$\delta_H$  (500 MHz,  $CDCl_3$ )

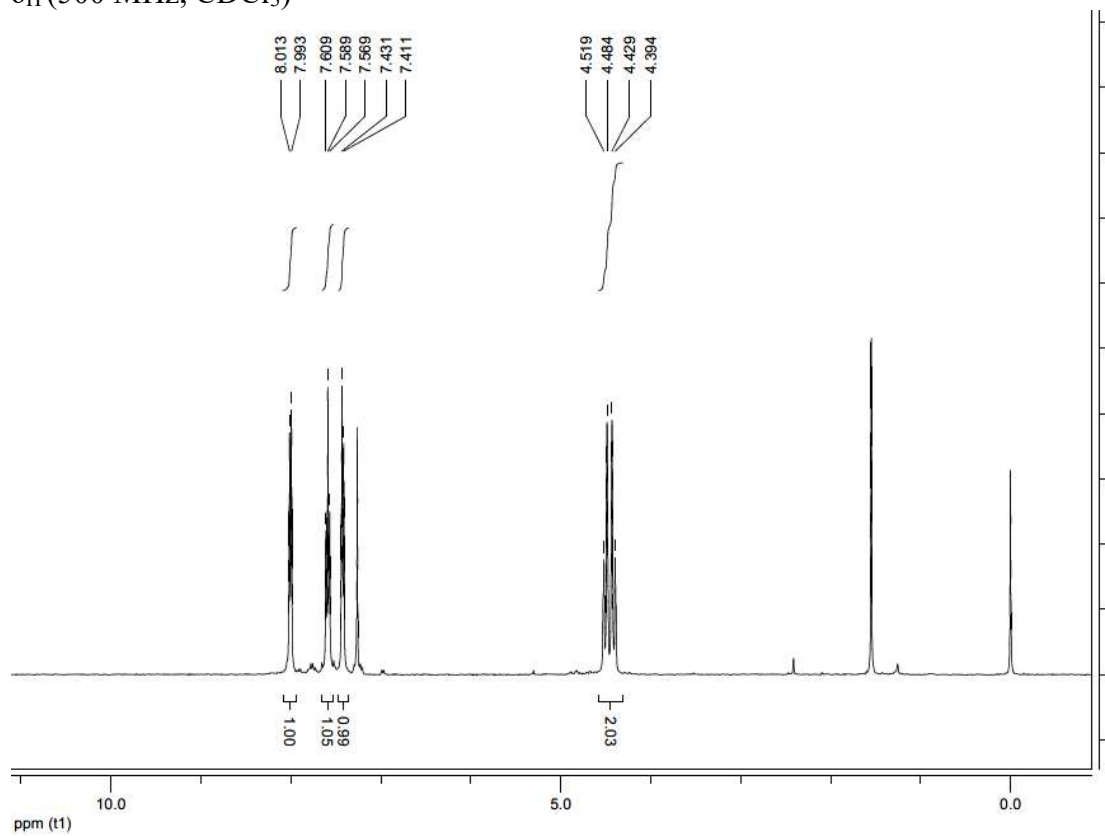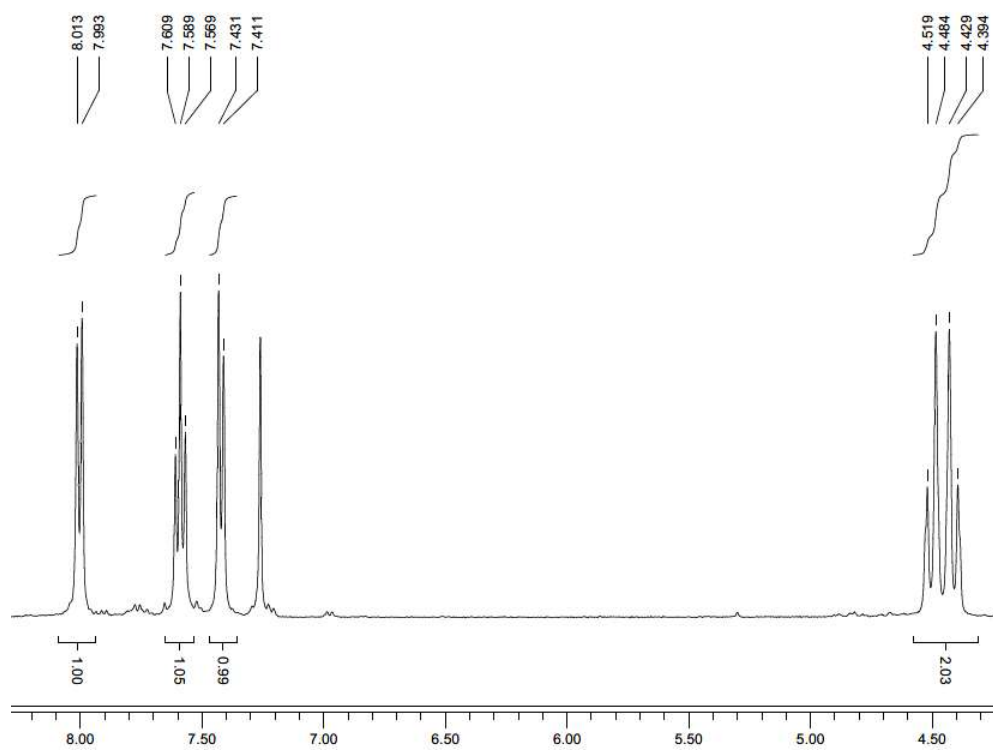

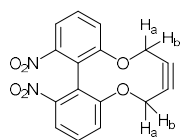

$\delta_C$  (126 MHz, CDCl<sub>3</sub>)

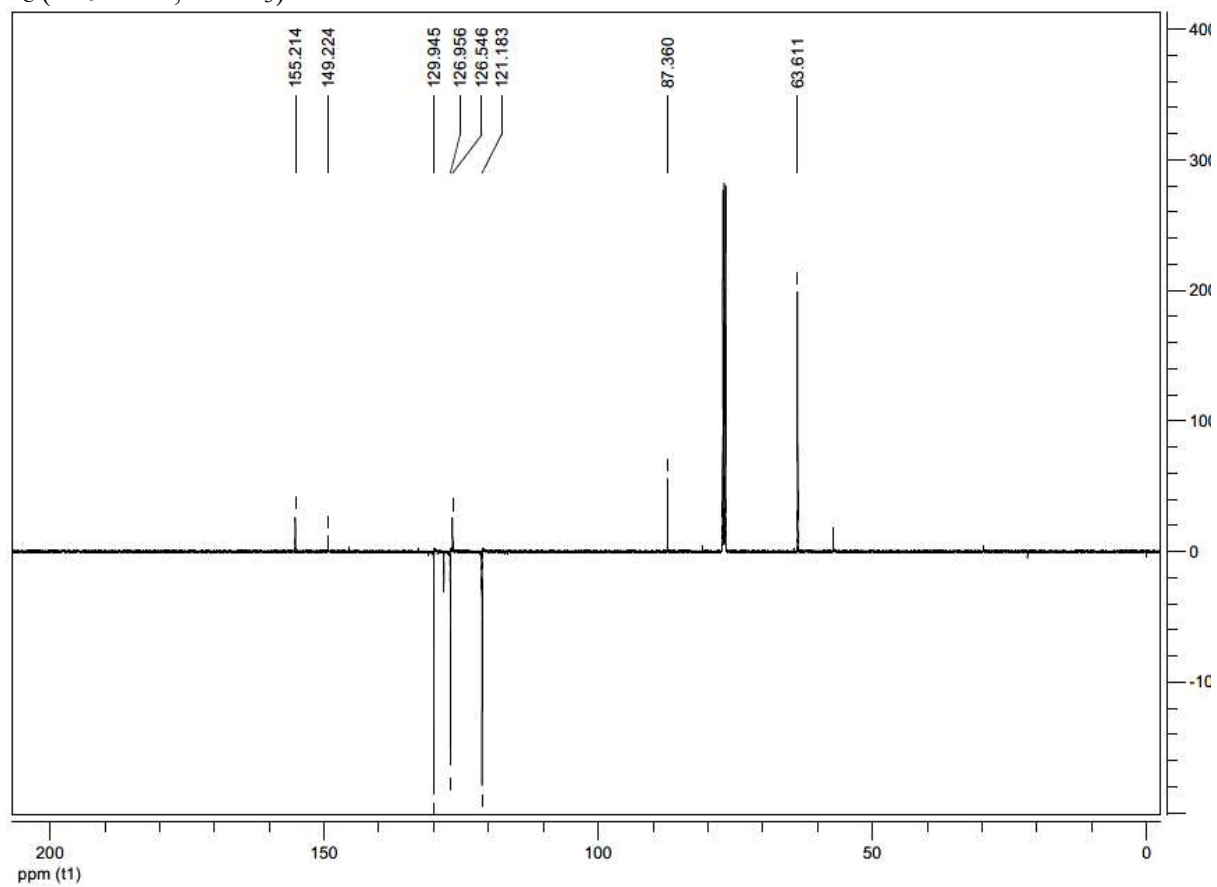

### Benzyl azide adduct of compound 49.

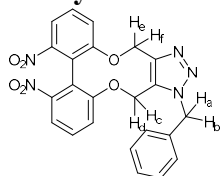

$\delta_H$  (500 MHz,  $CDCl_3$ )

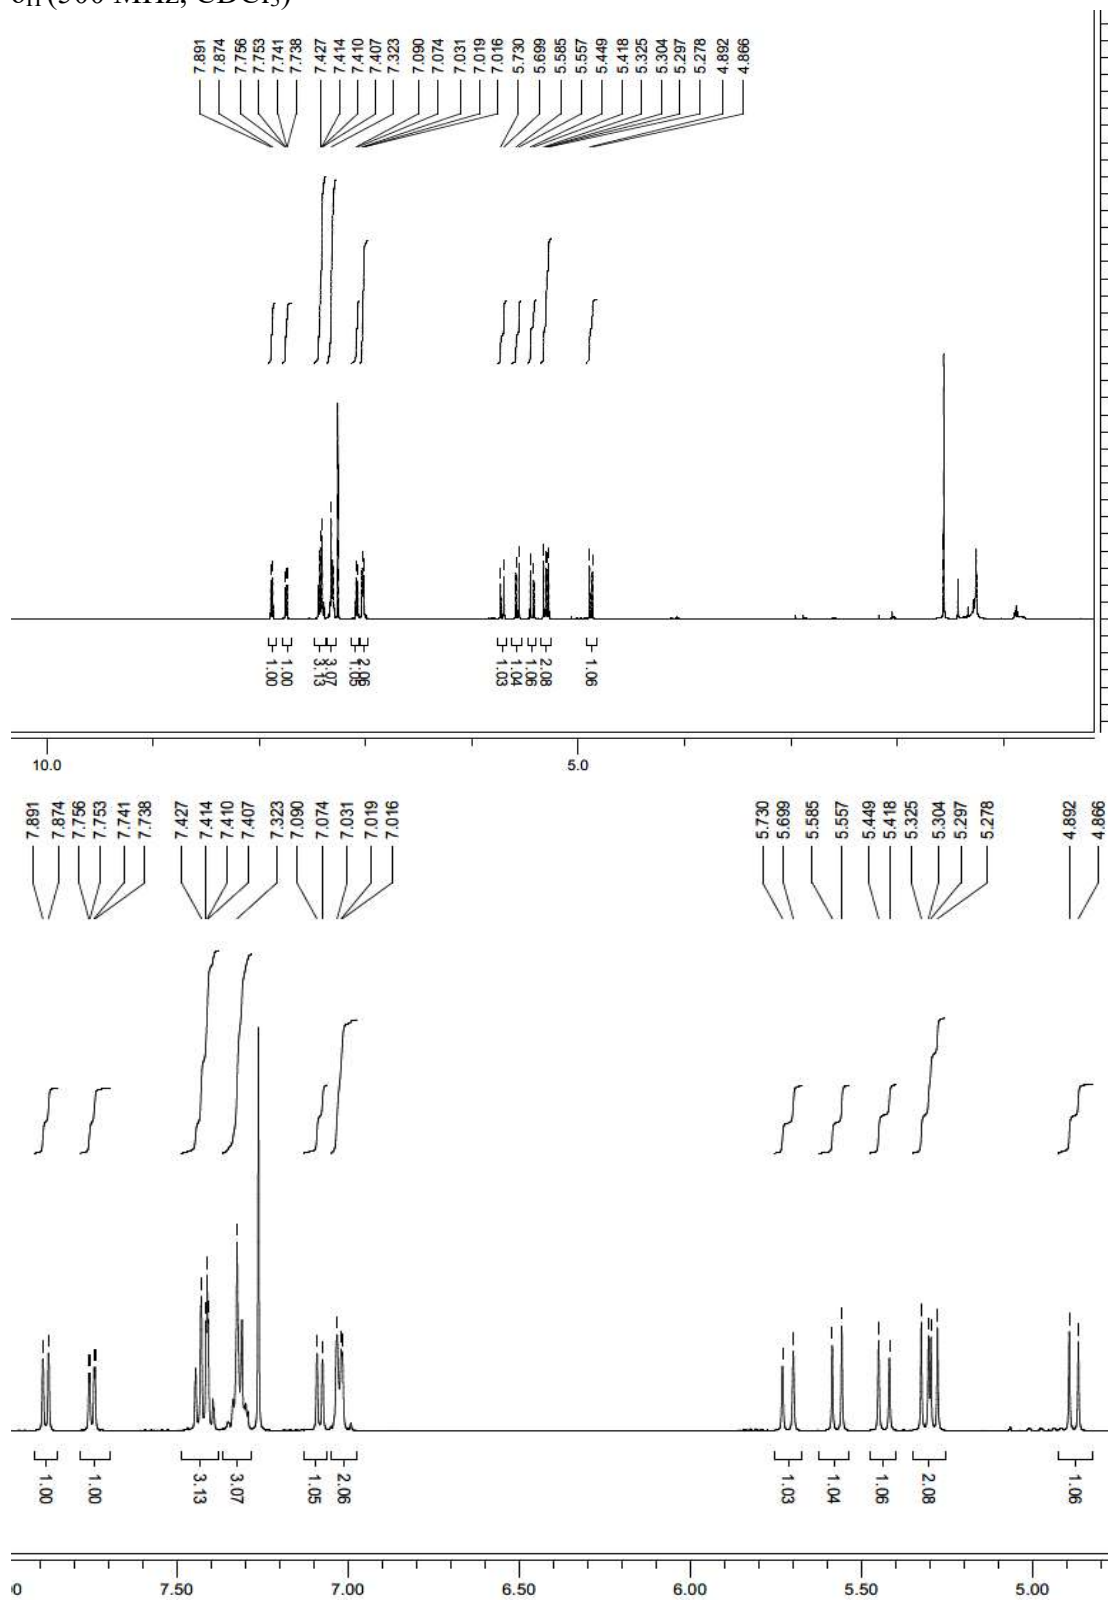

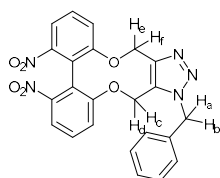

$\delta_C$  (126 MHz,  $CDCl_3$ )

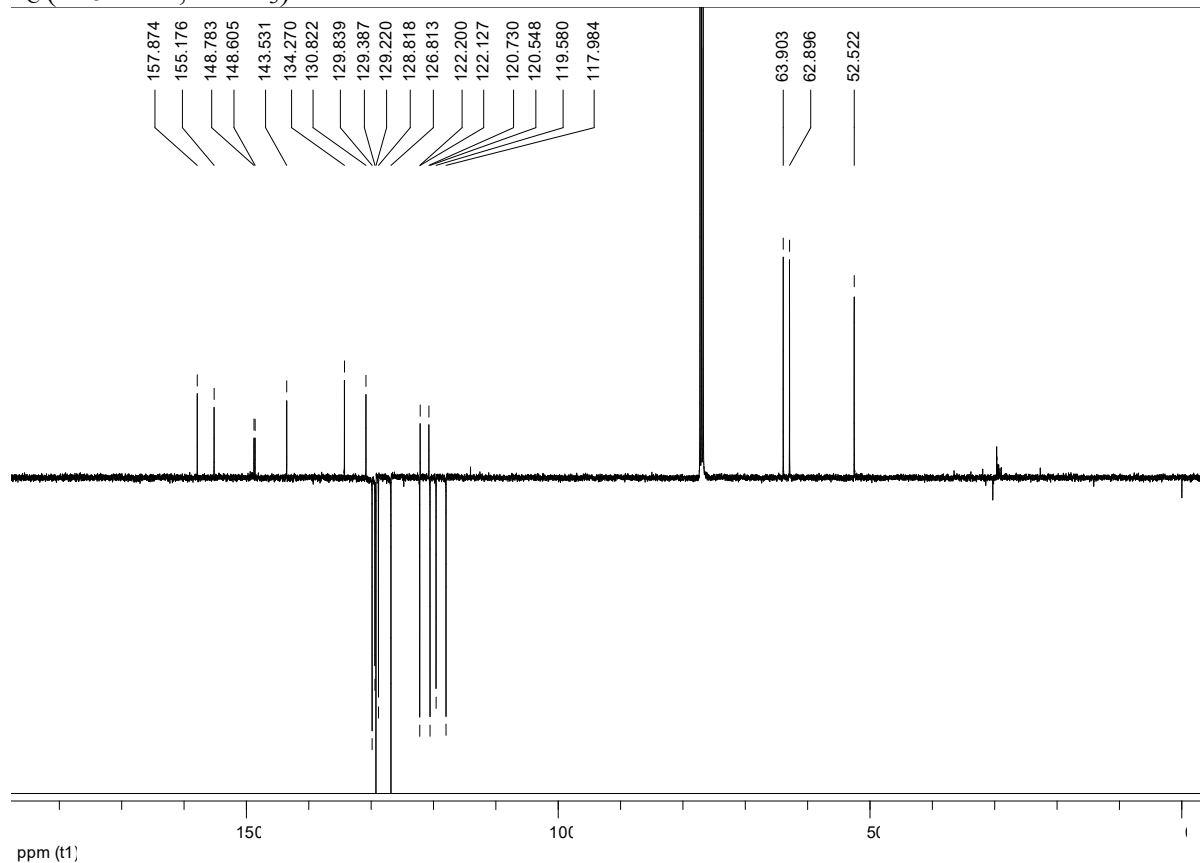



# Compound 50.

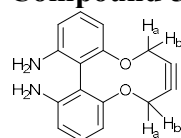

$\delta_H$  (500 MHz, CDCl<sub>3</sub>)

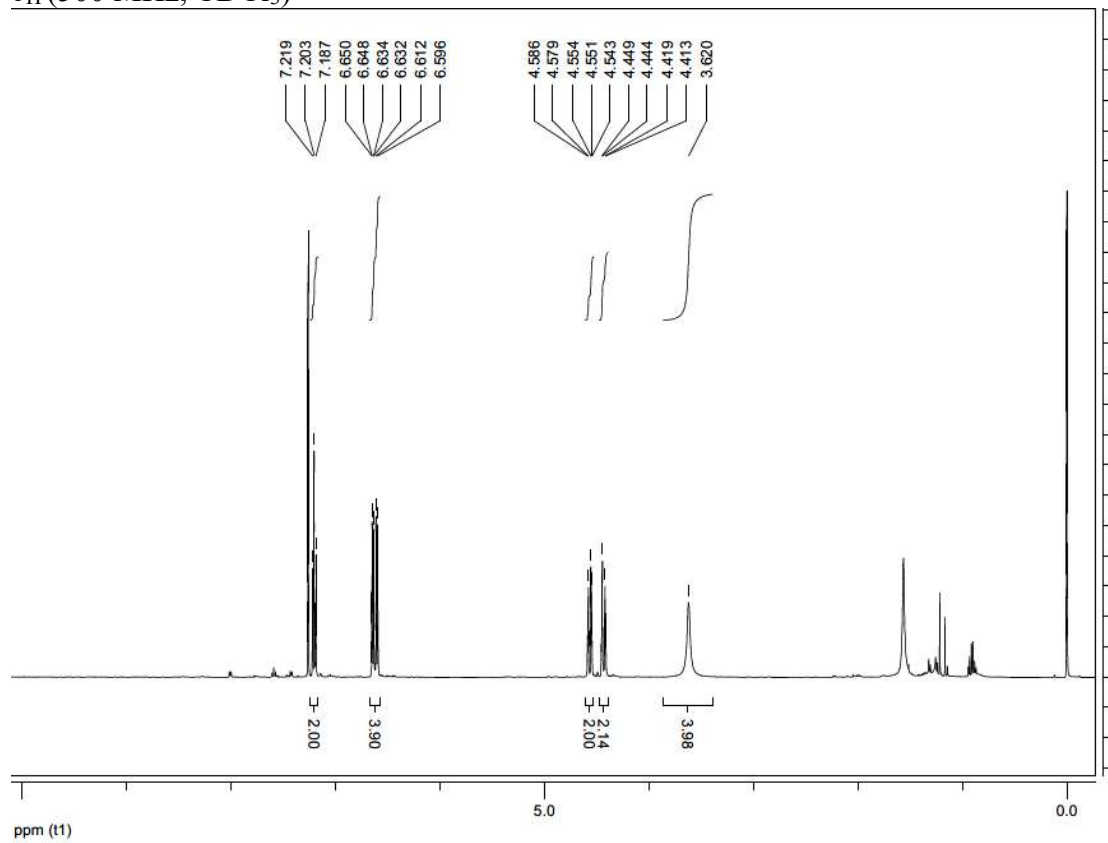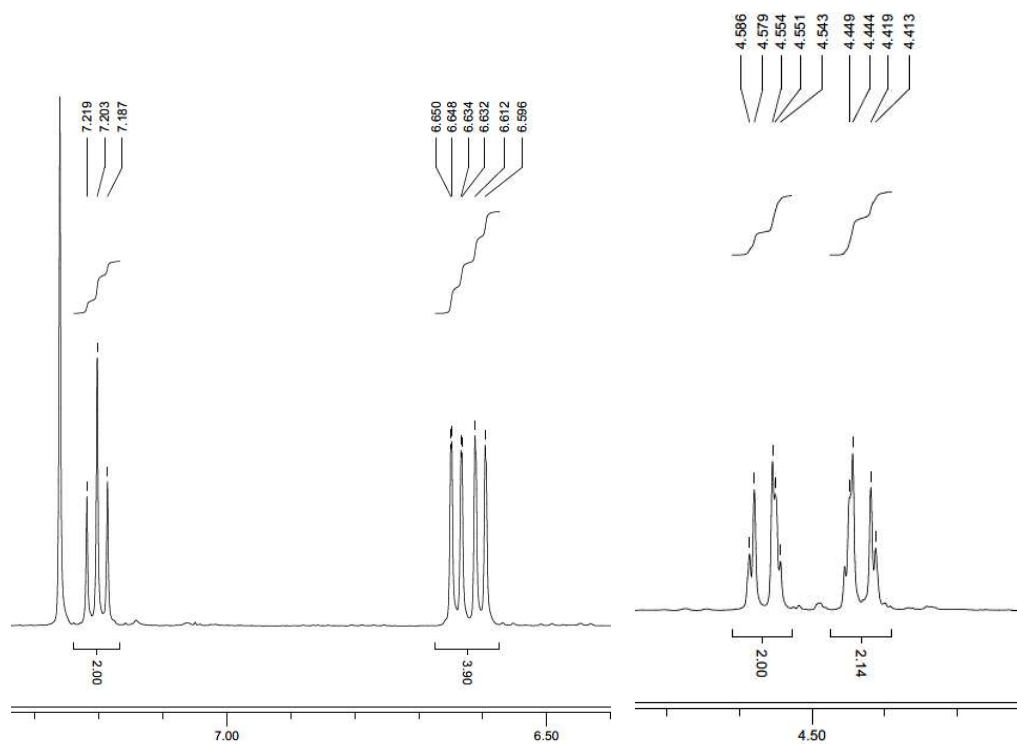

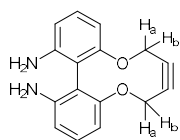

$\delta_C$  (126 MHz, CDCl<sub>3</sub>)

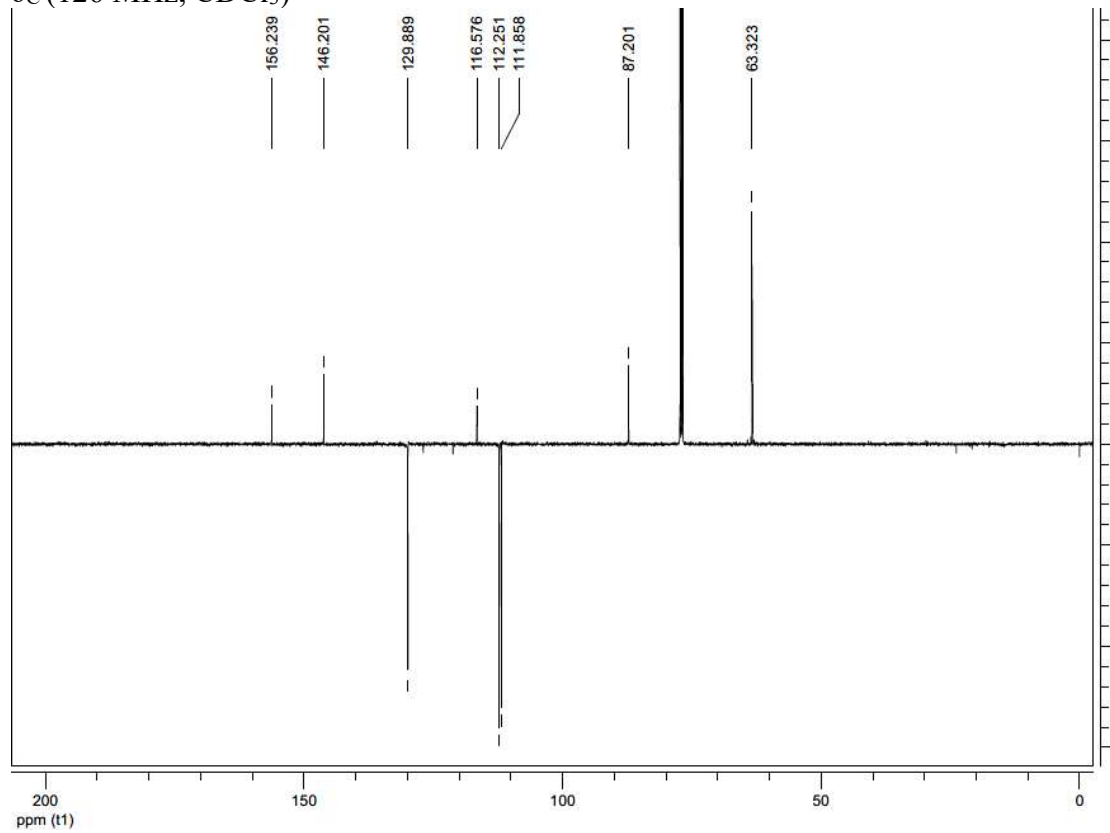

**Benzyl azide adduct of compound 50.**

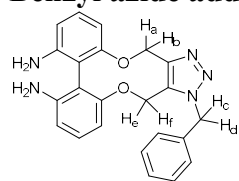

$\delta_H$  (500 MHz,  $CDCl_3$ )

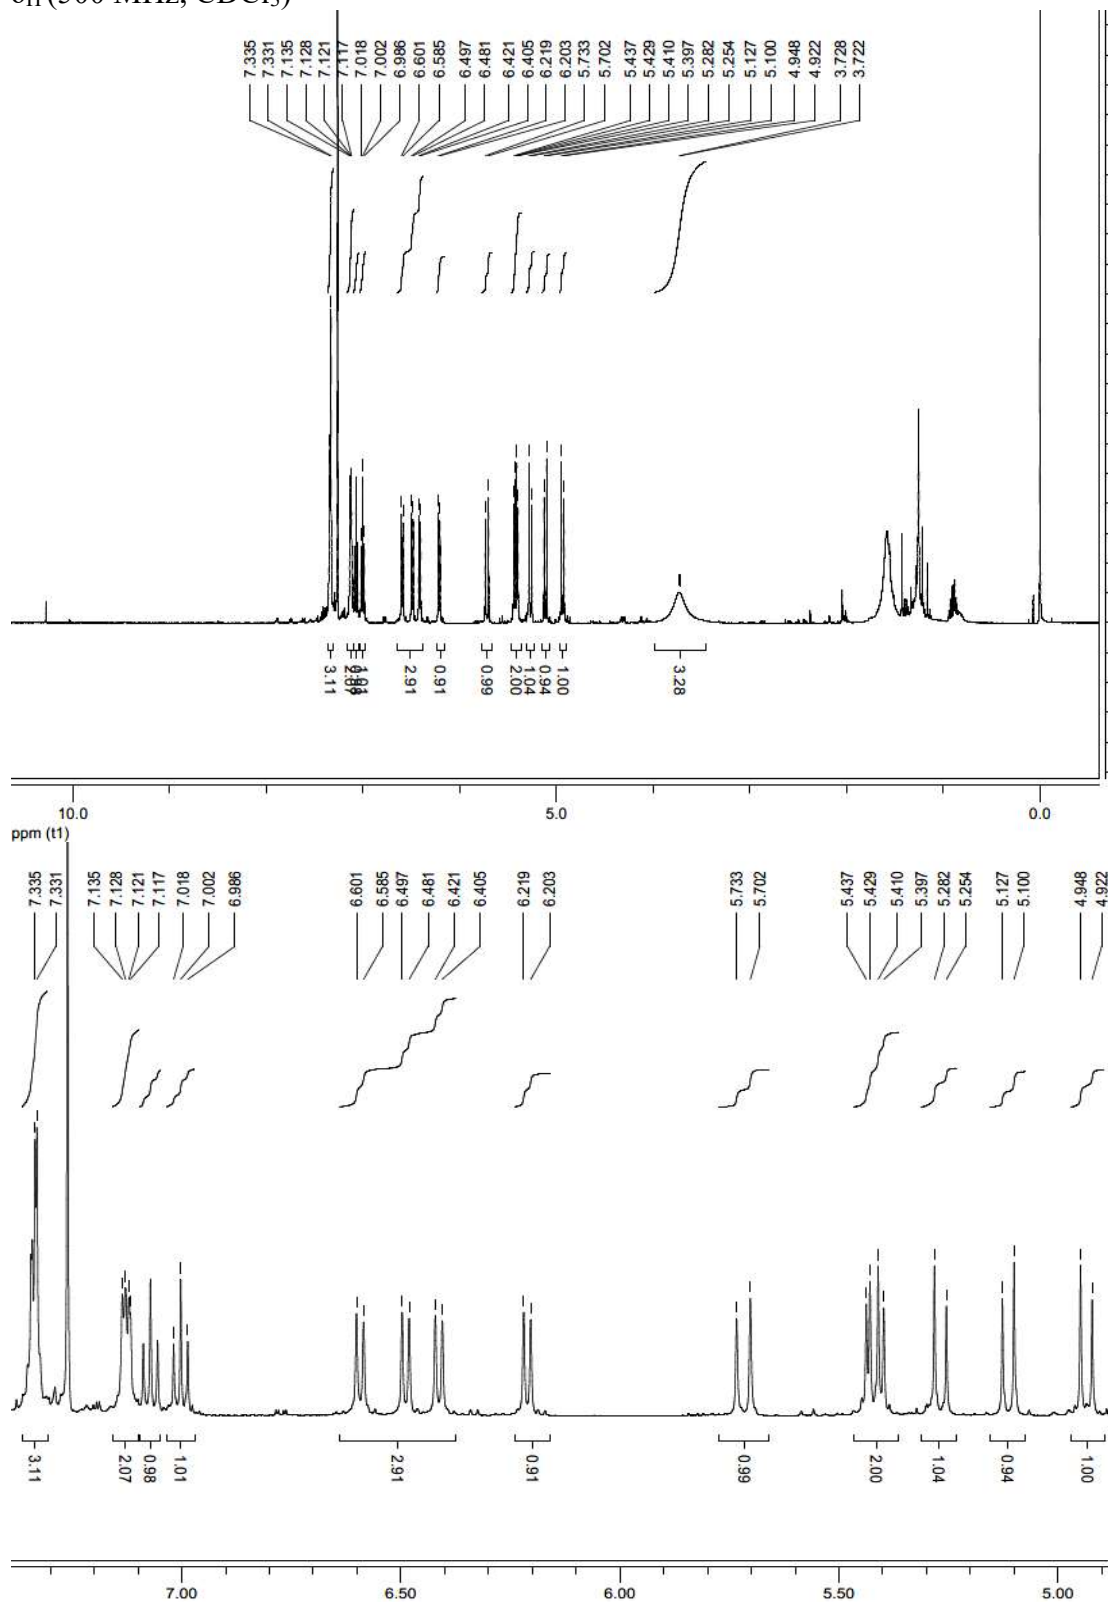

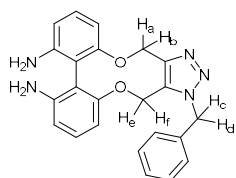

$\delta_C$  (126 MHz,  $CDCl_3$ )

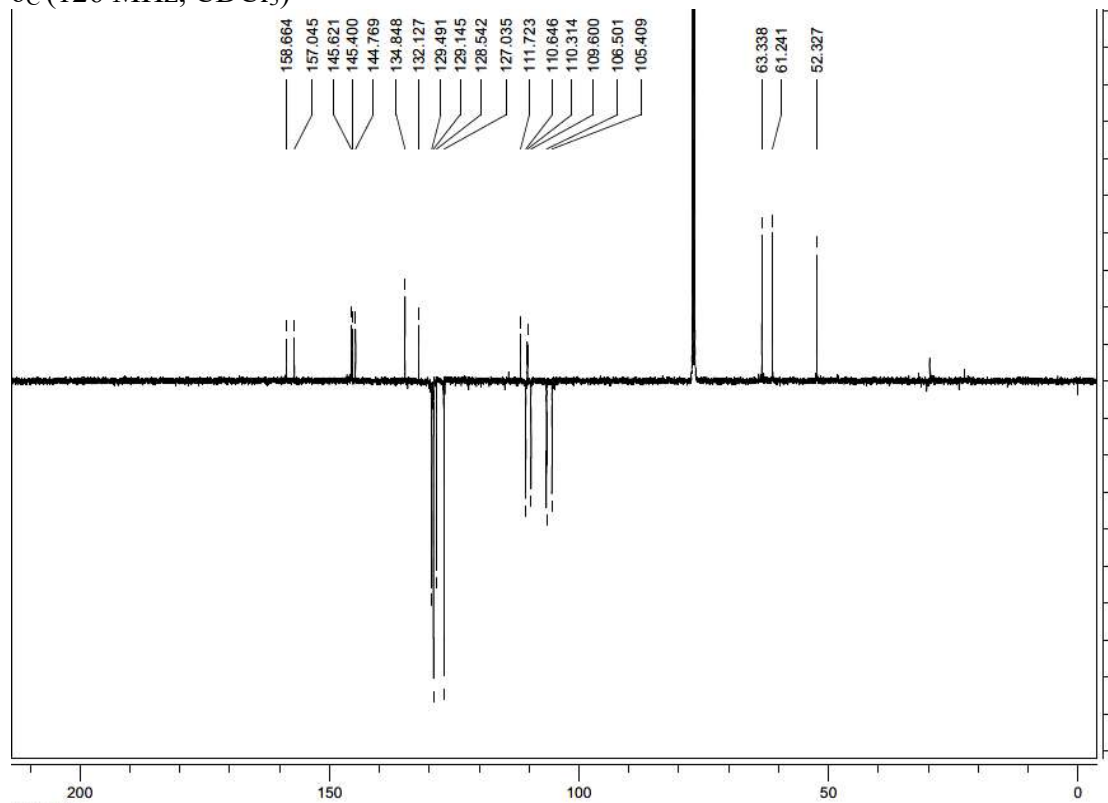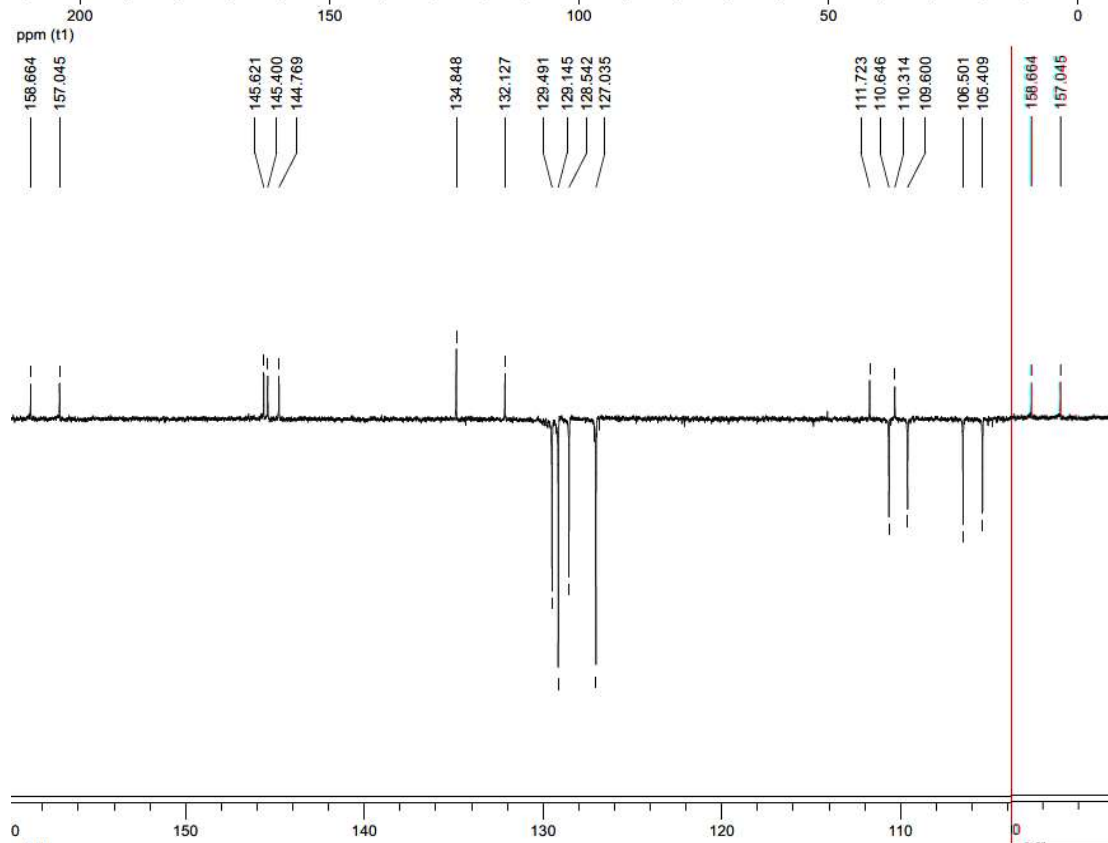

**Compound 51.**

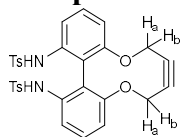

$\delta_H$  (500 MHz,  $CDCl_3$ )

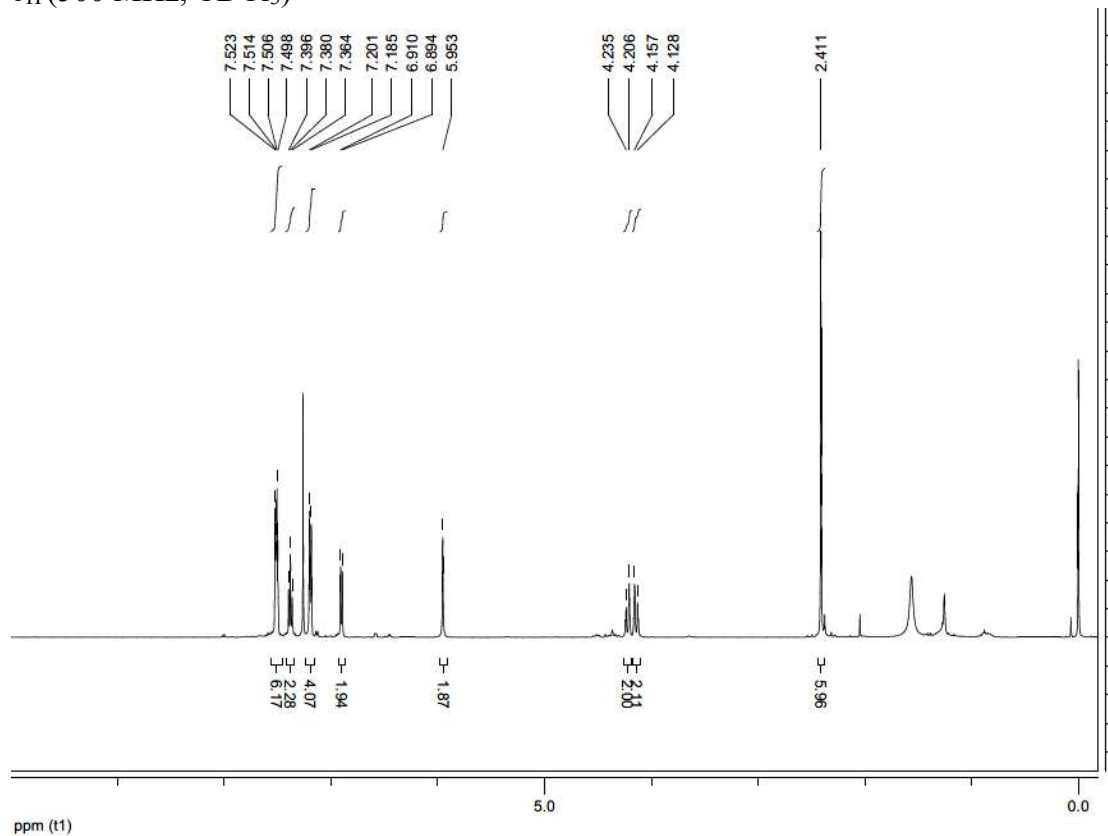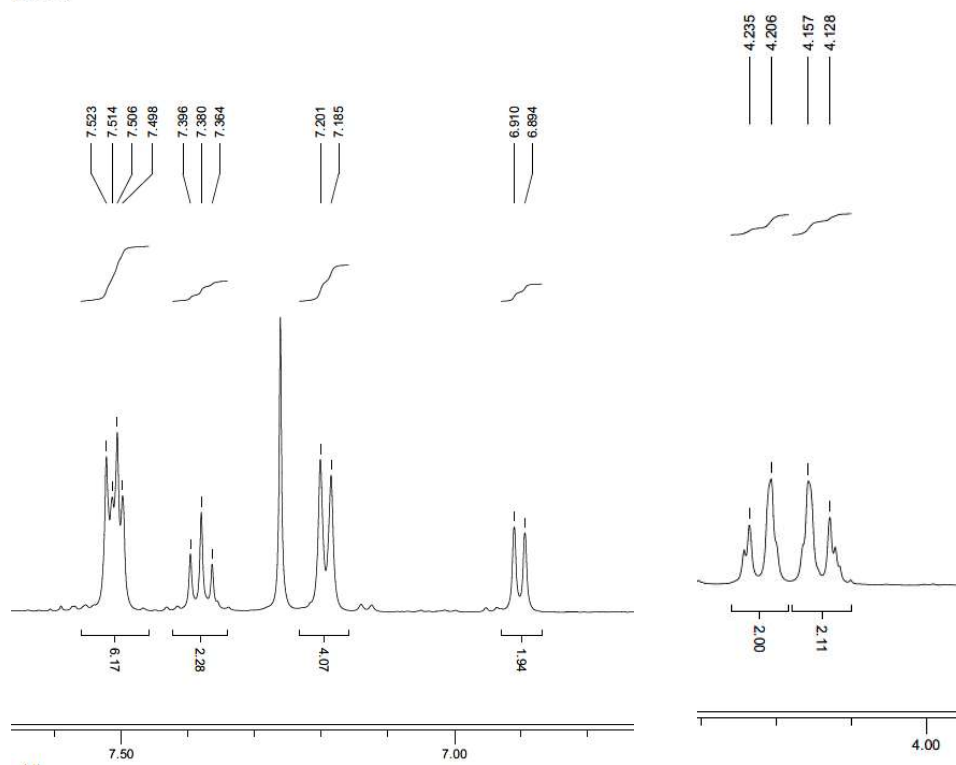



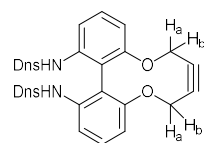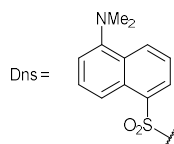

**Compound 52.**

$\delta_H$  (400 MHz,  $CDCl_3$ )

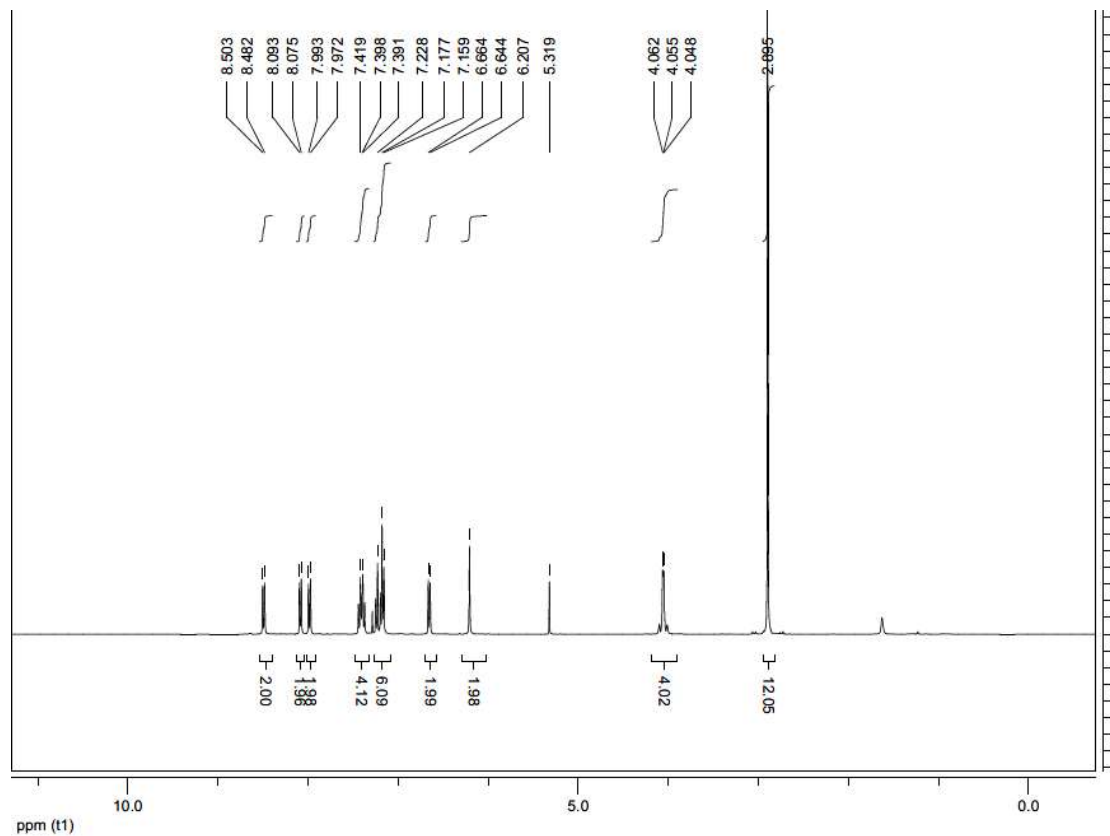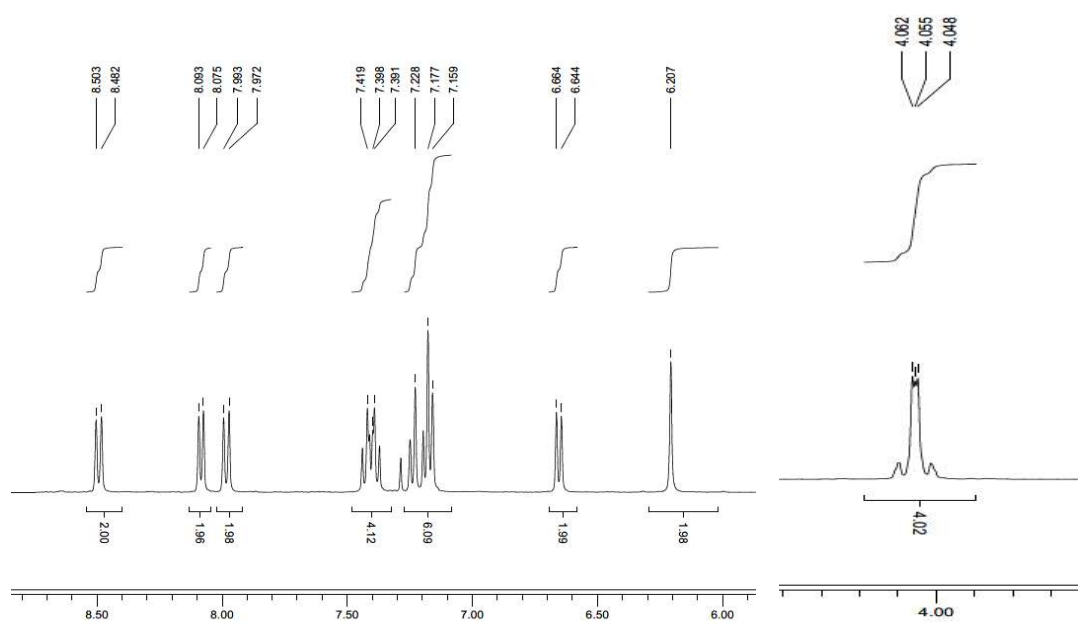





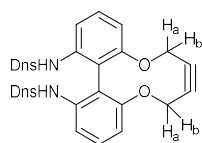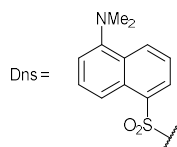

$\delta_C$  (126 MHz,  $CDCl_3$ )

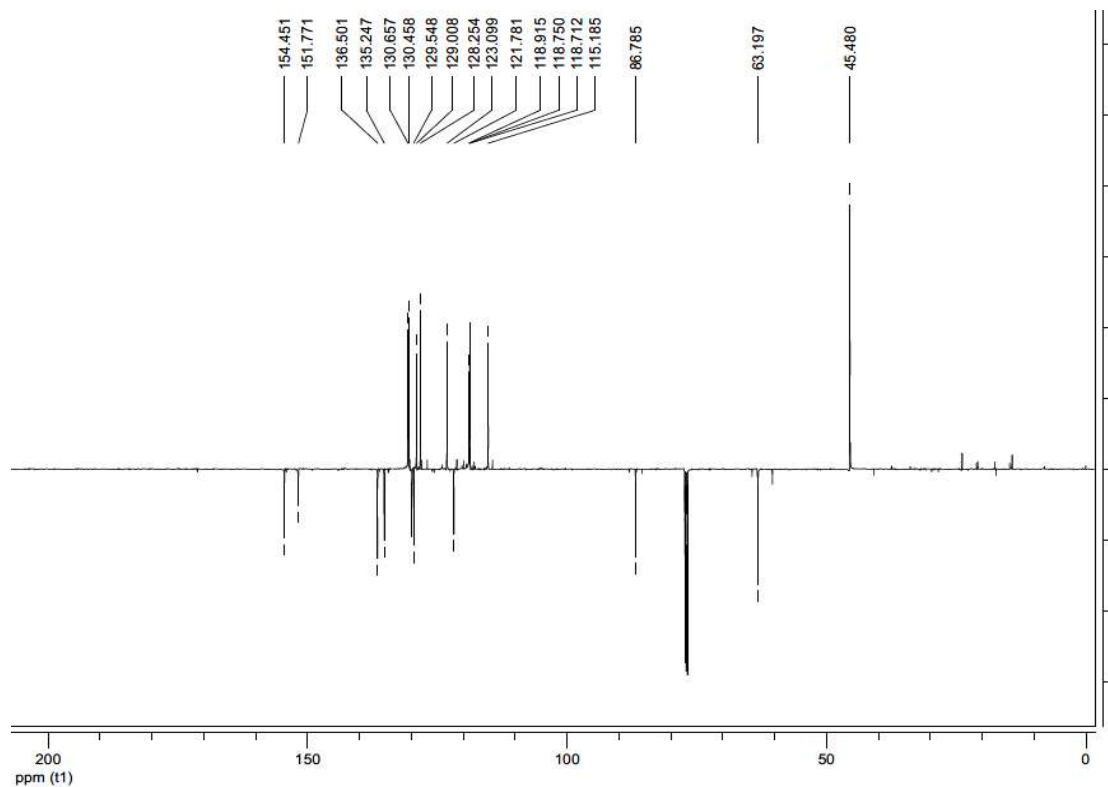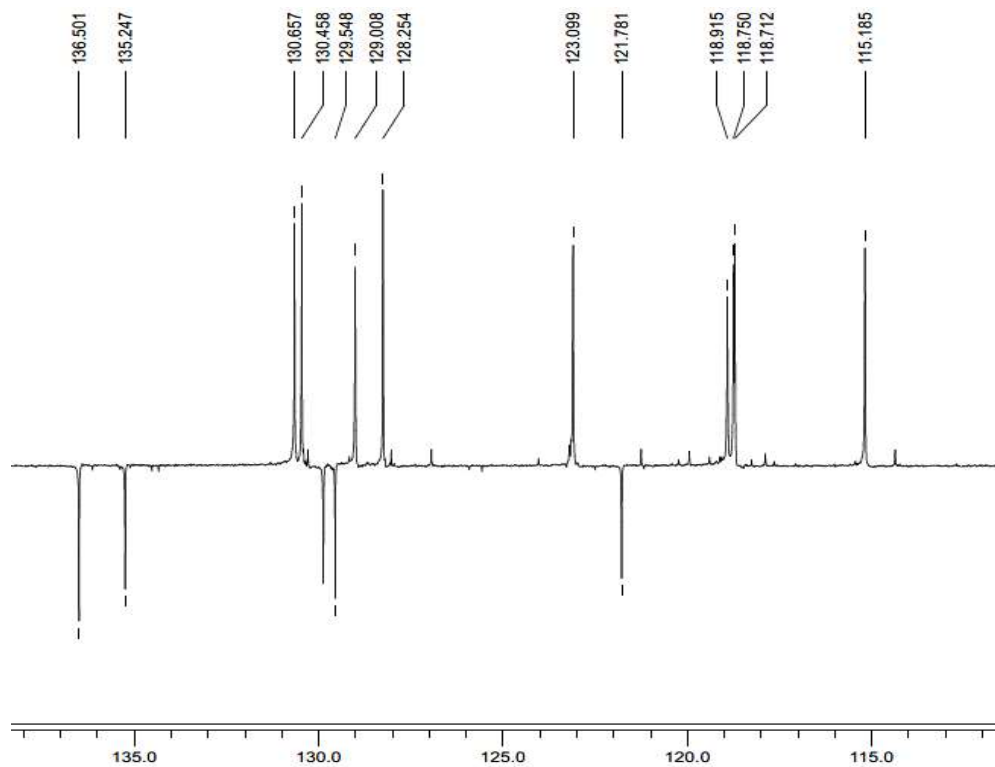

### Compound 53.

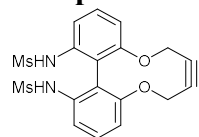

$\delta_H$  (500 MHz,  $CDCl_3$ )

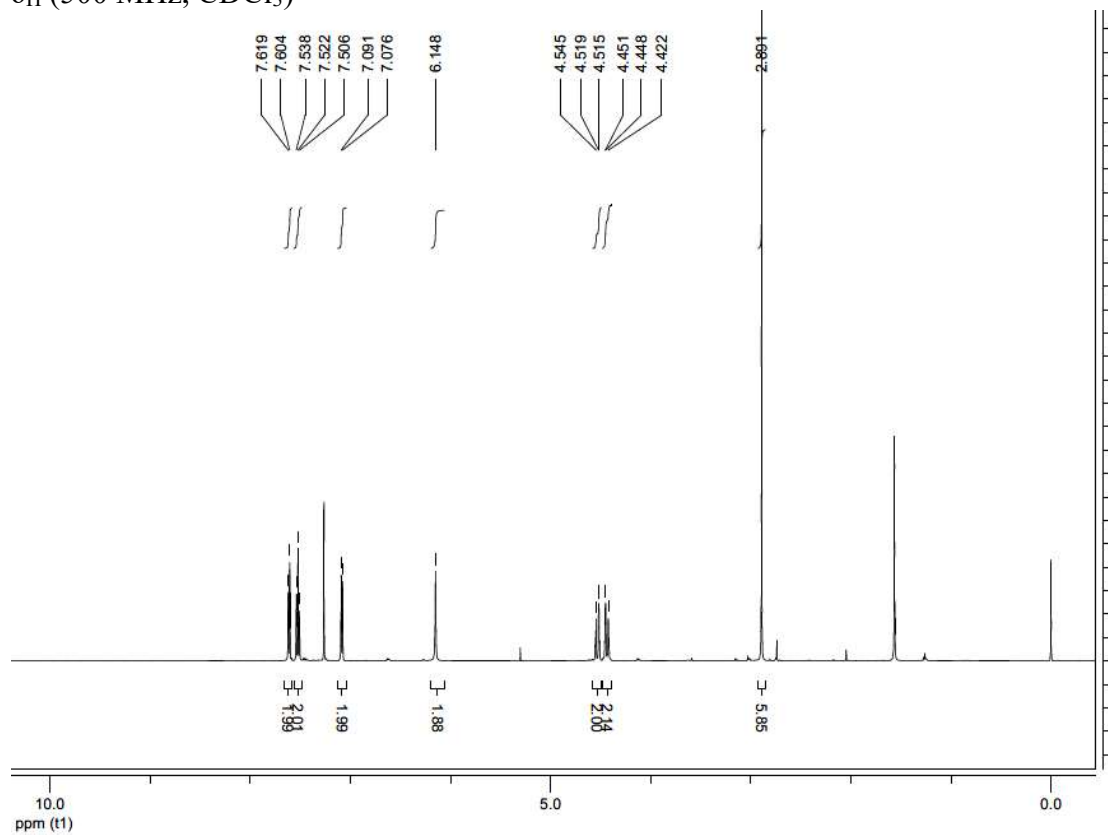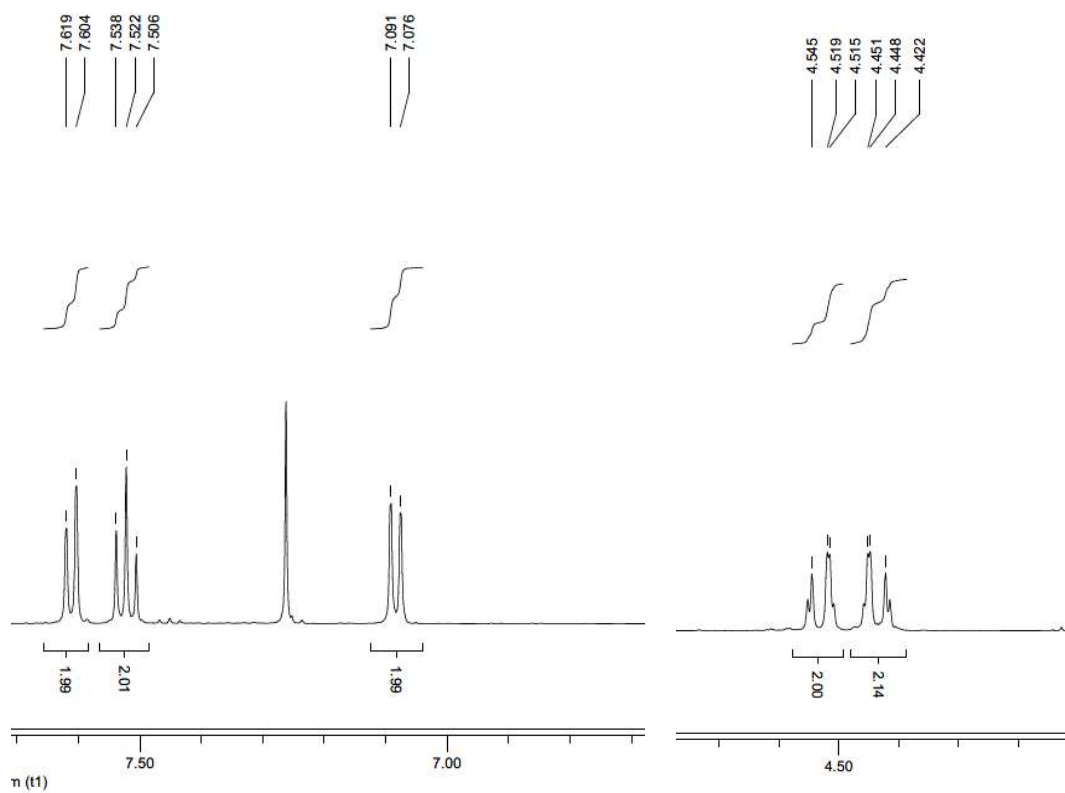

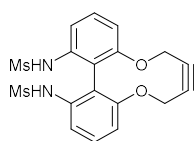

$\delta_C$  (125 MHz,  $CDCl_3$ )

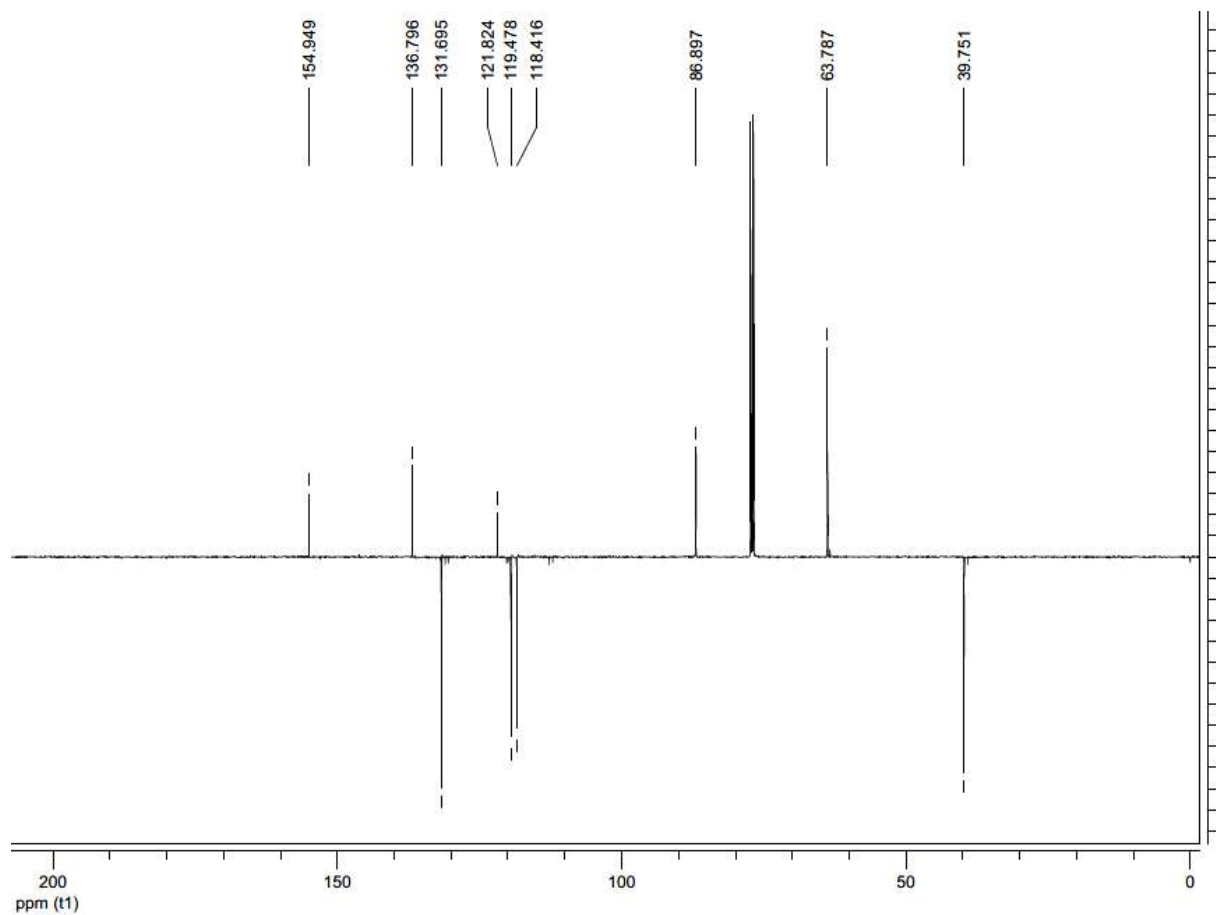

# Compound 54.

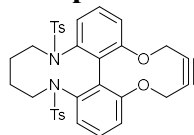

$\delta_H$  (500 MHz,  $CDCl_3$ )

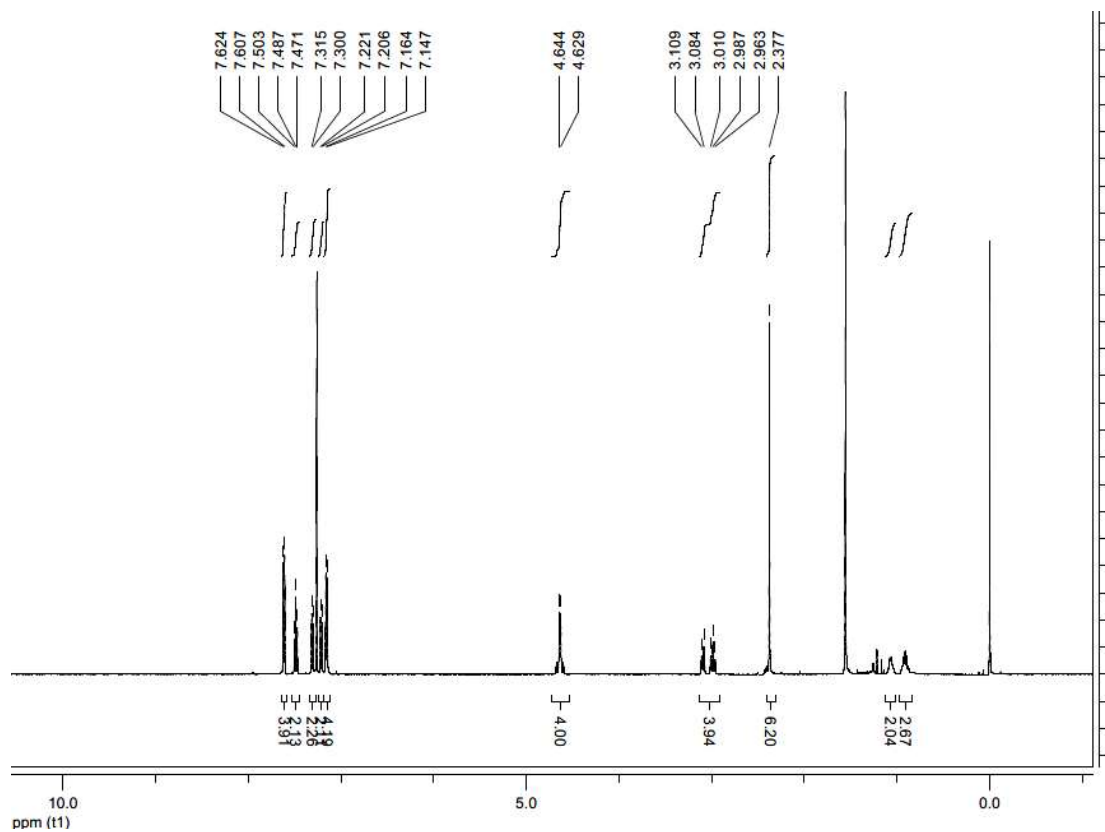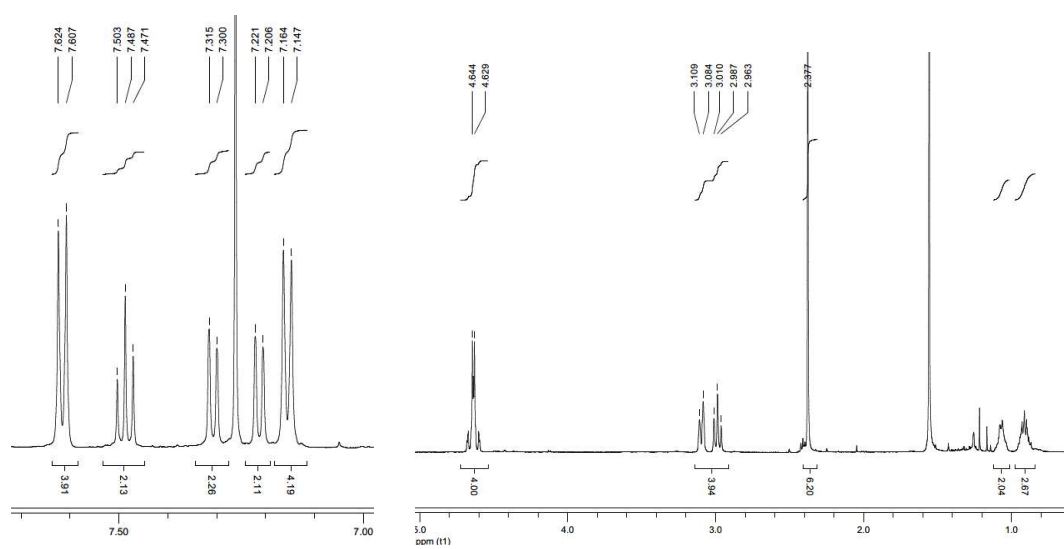

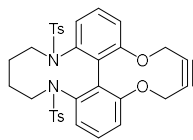

$\delta_C$  (126 MHz,  $CDCl_3$ )

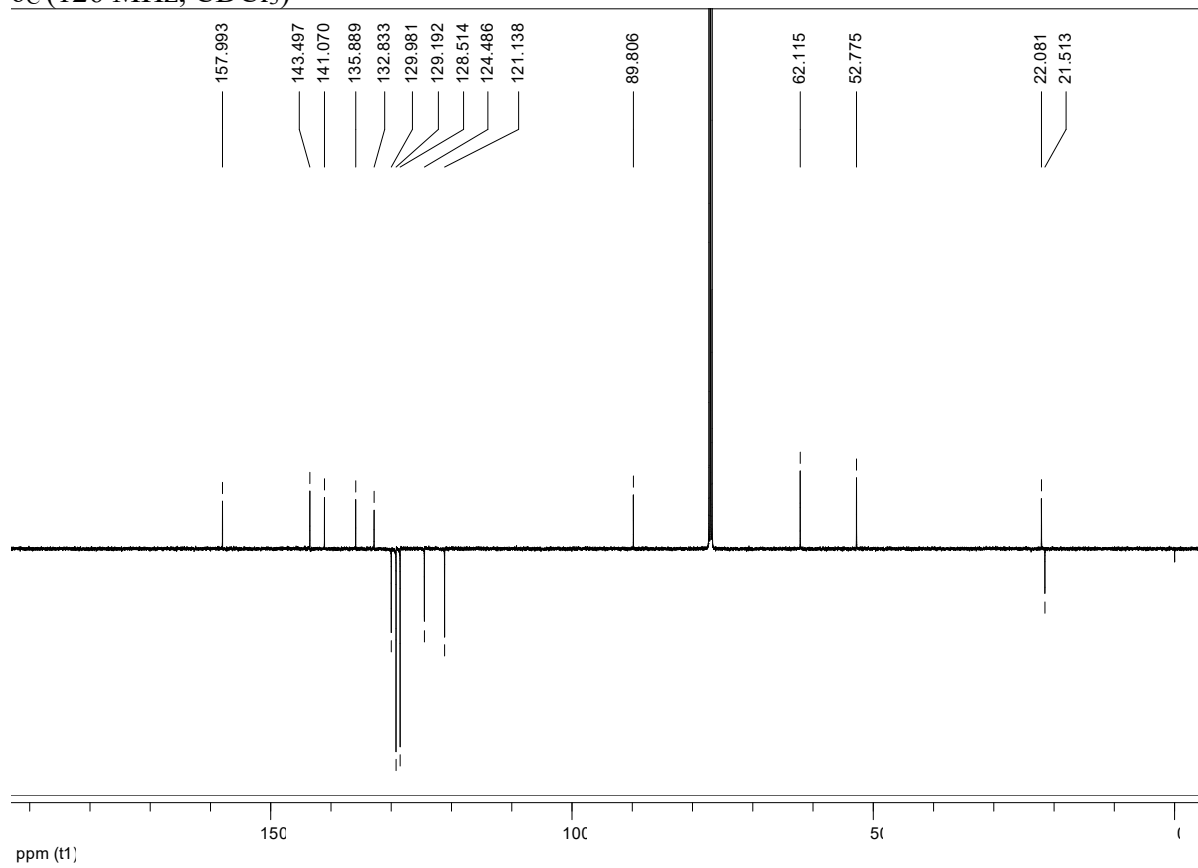

**Compound 56.**

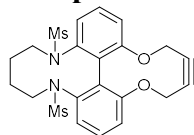

$\delta_H$  (500 MHz,  $CDCl_3$ )

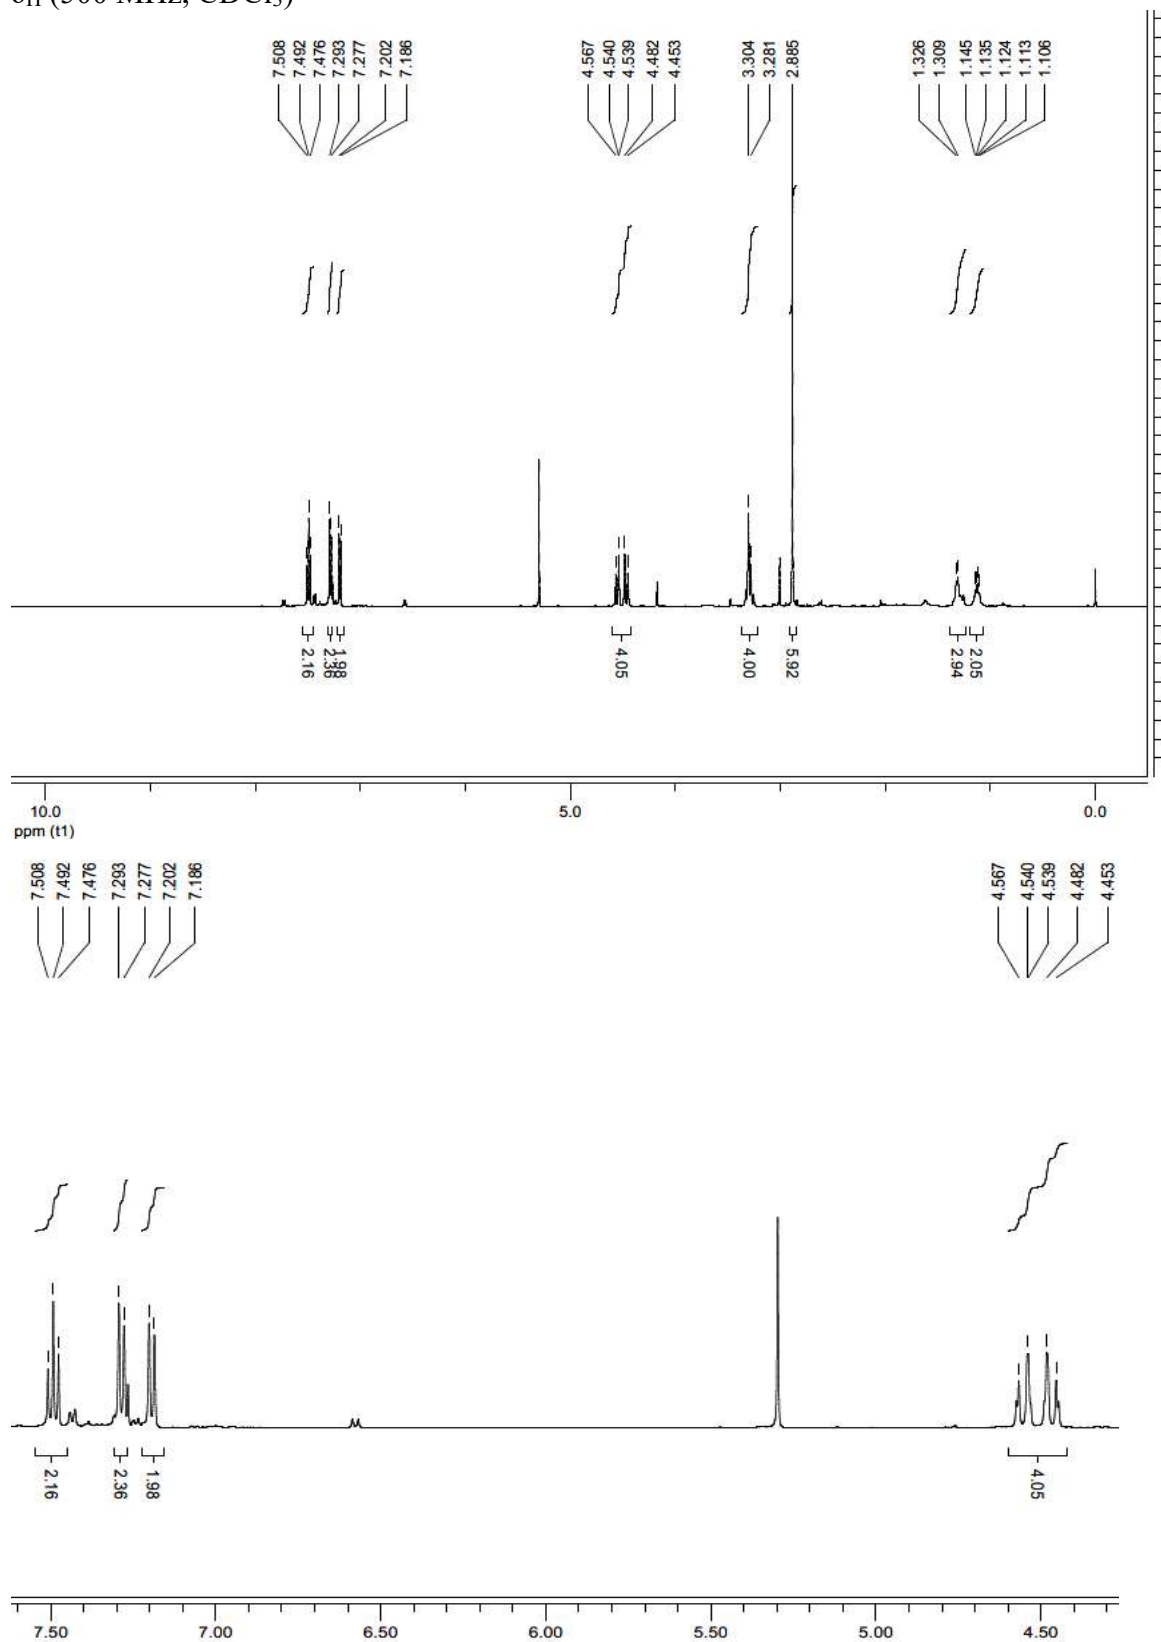

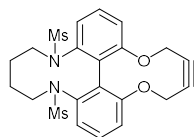

$\delta_C$  (125 MHz,  $CDCl_3$ )

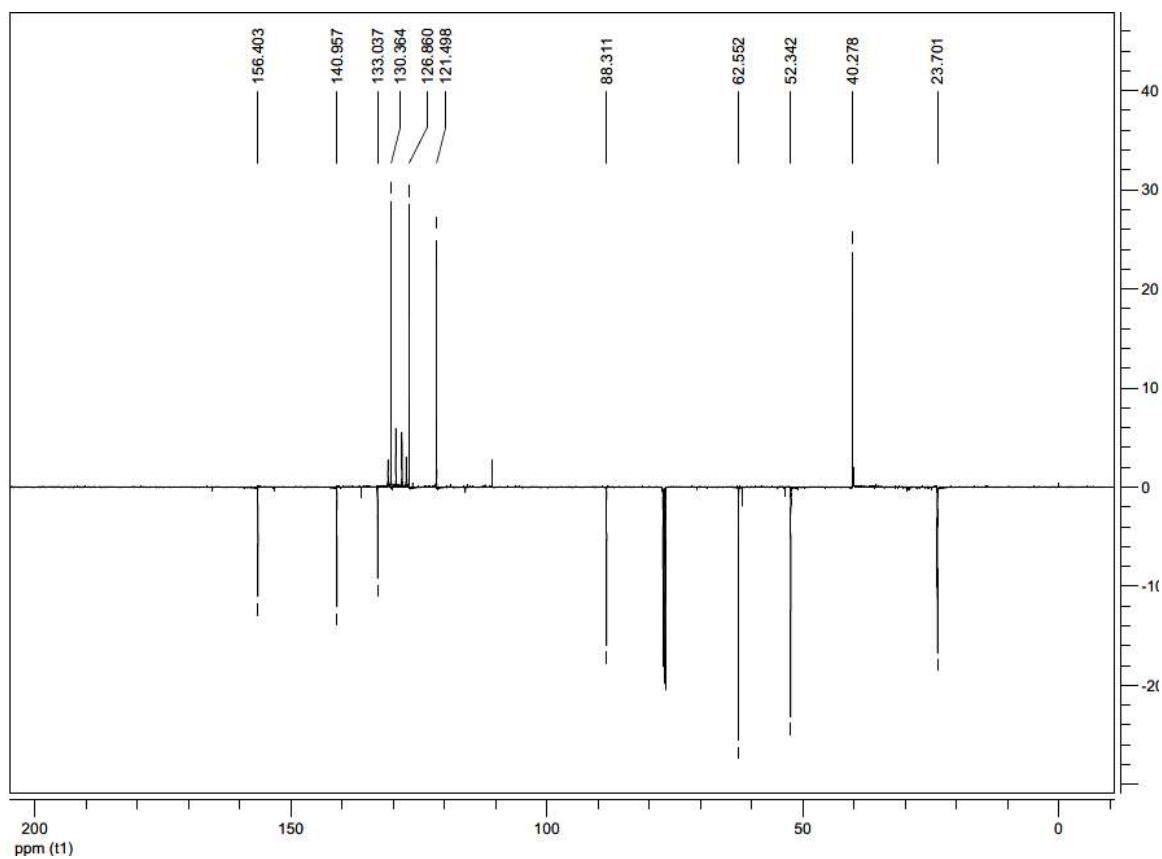

**Compound 57.**

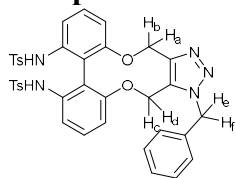

$\delta_H$  (500 MHz,  $CDCl_3$ )

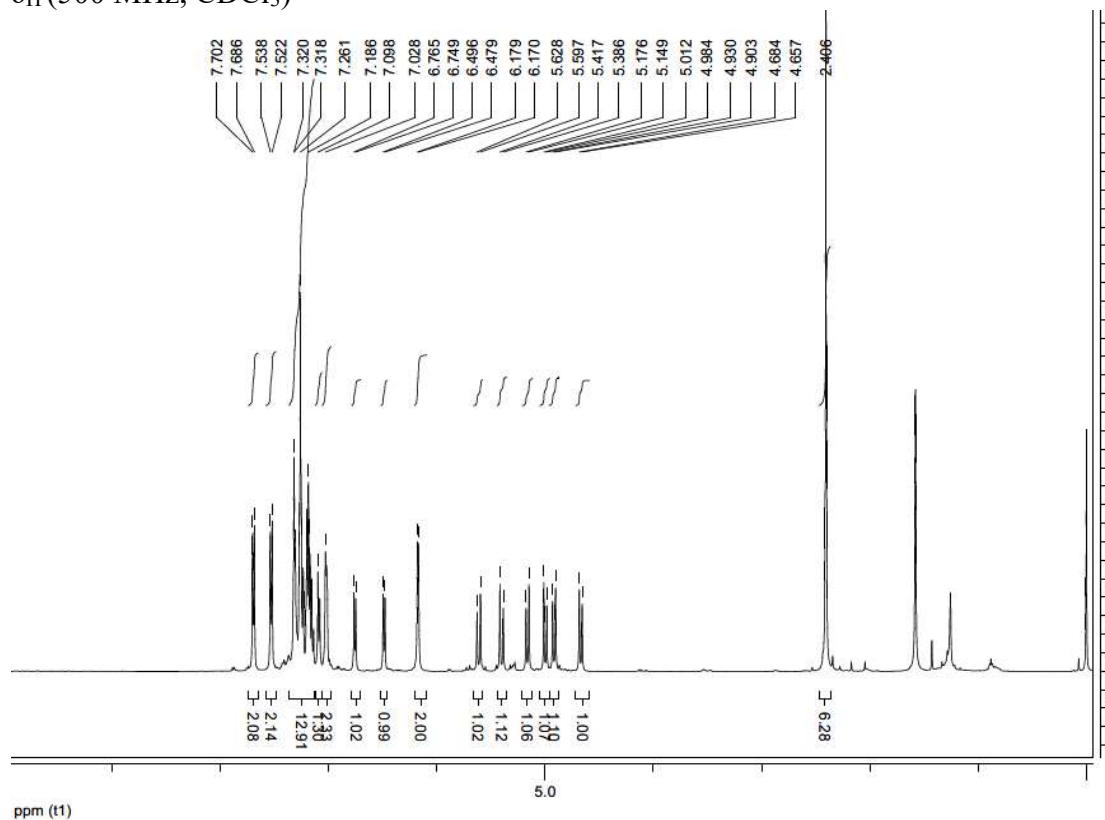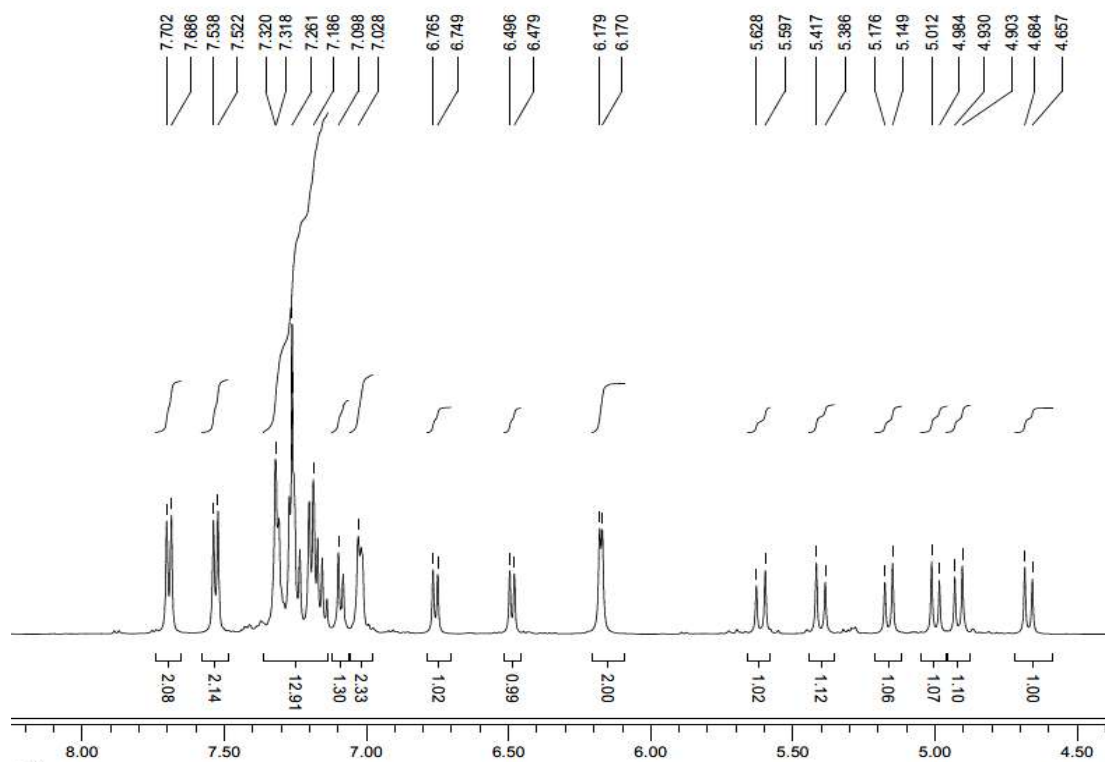



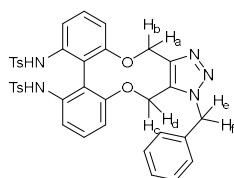

$\delta_C$  (126 MHz, CDCl<sub>3</sub>)

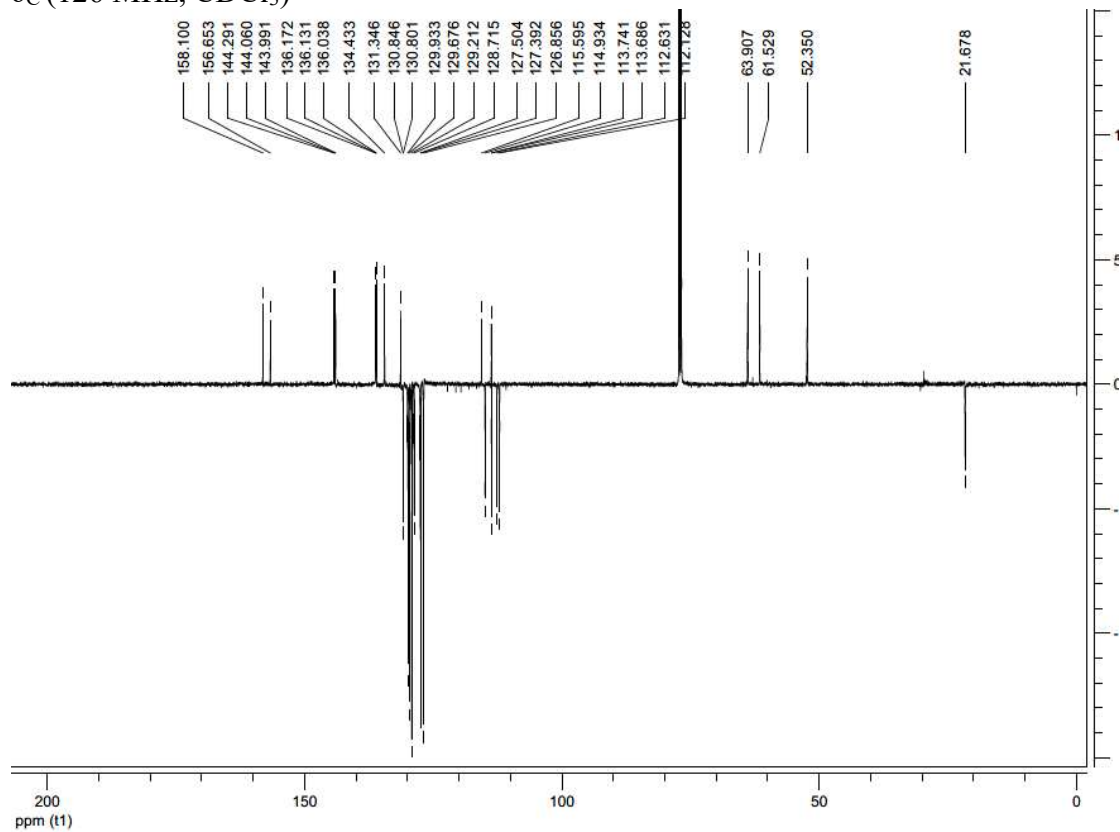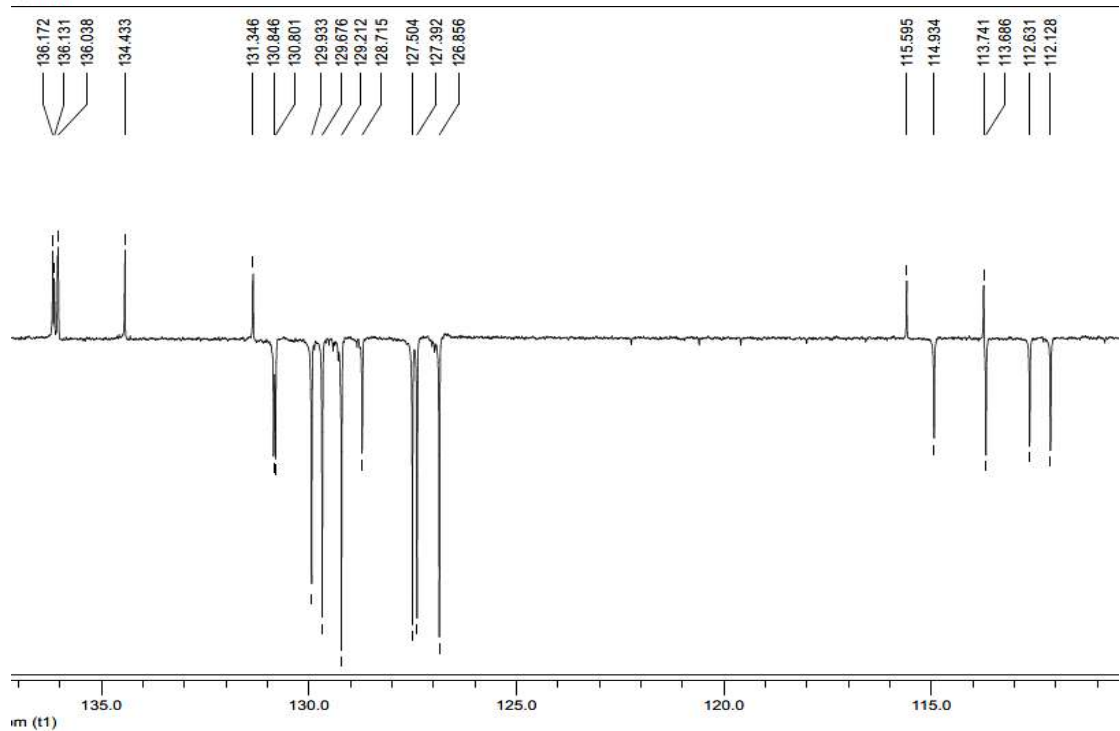

### Compound 59.

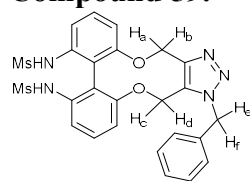

$\delta_H$  (500 MHz,  $CDCl_3$ )

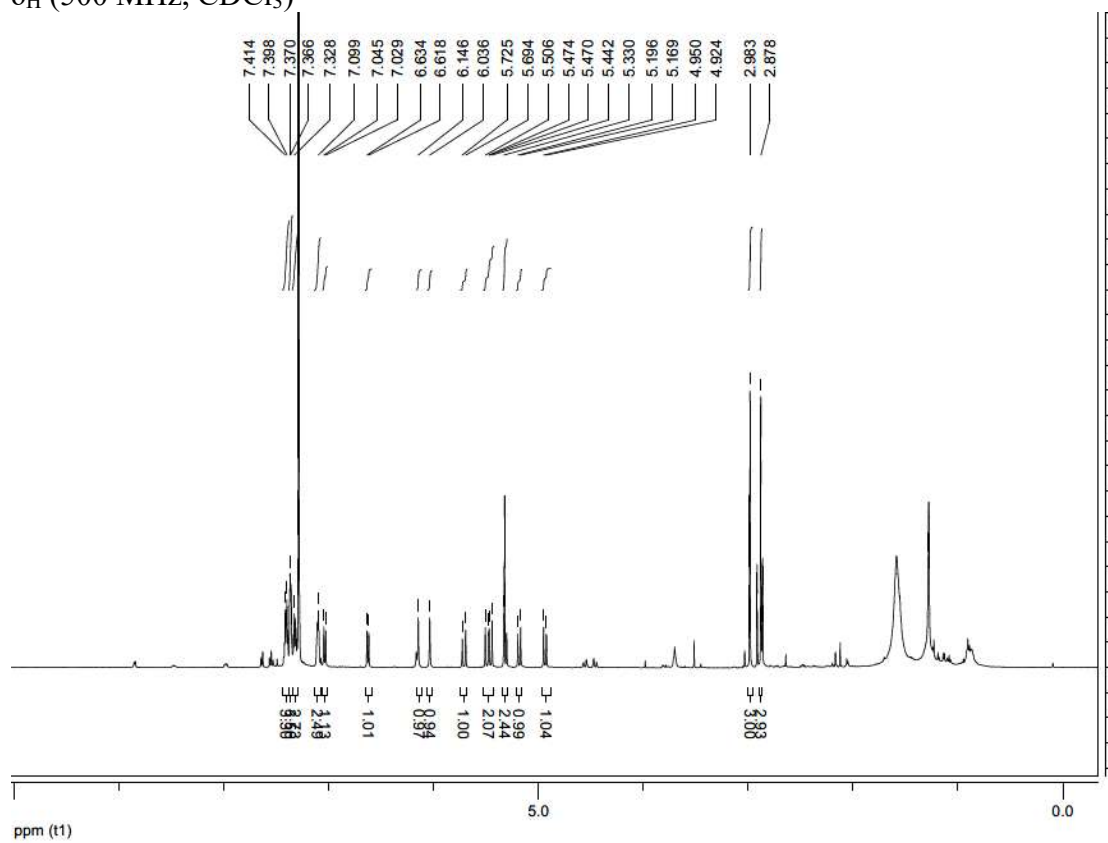

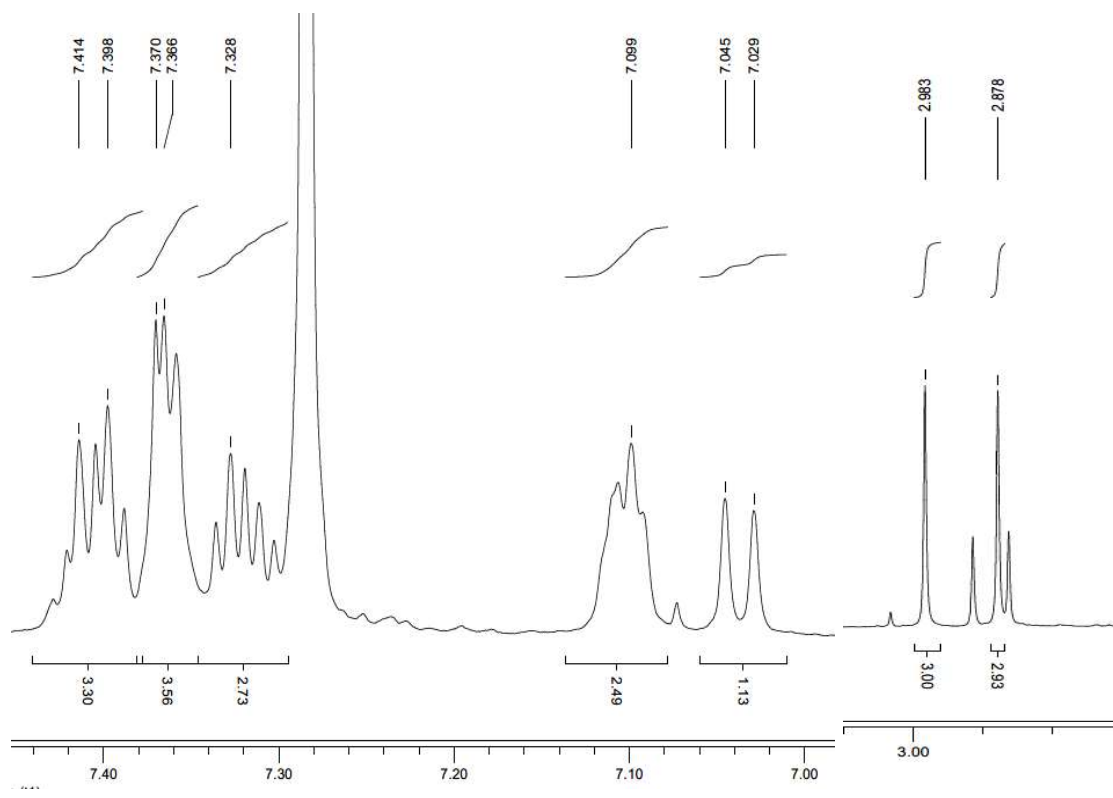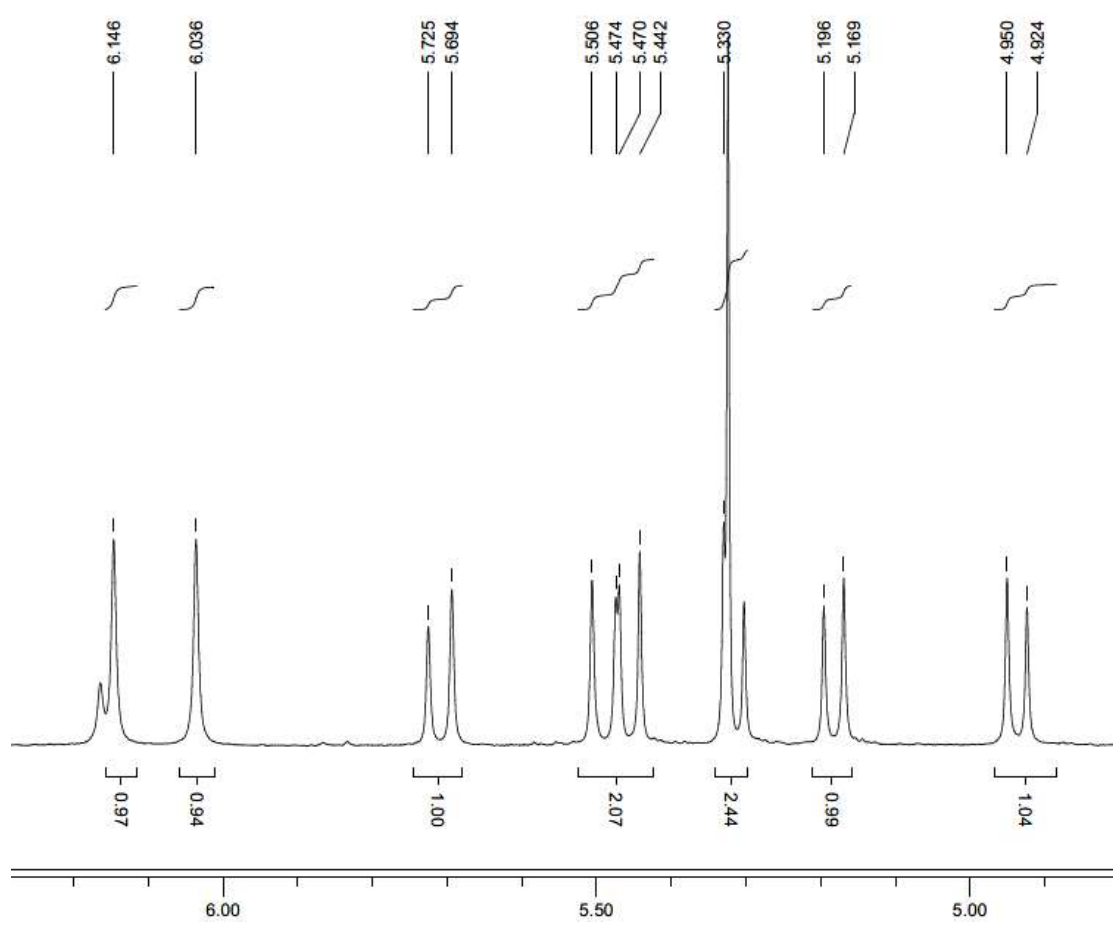

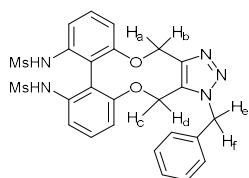

$\delta_C$  (126 MHz,  $CDCl_3$ )

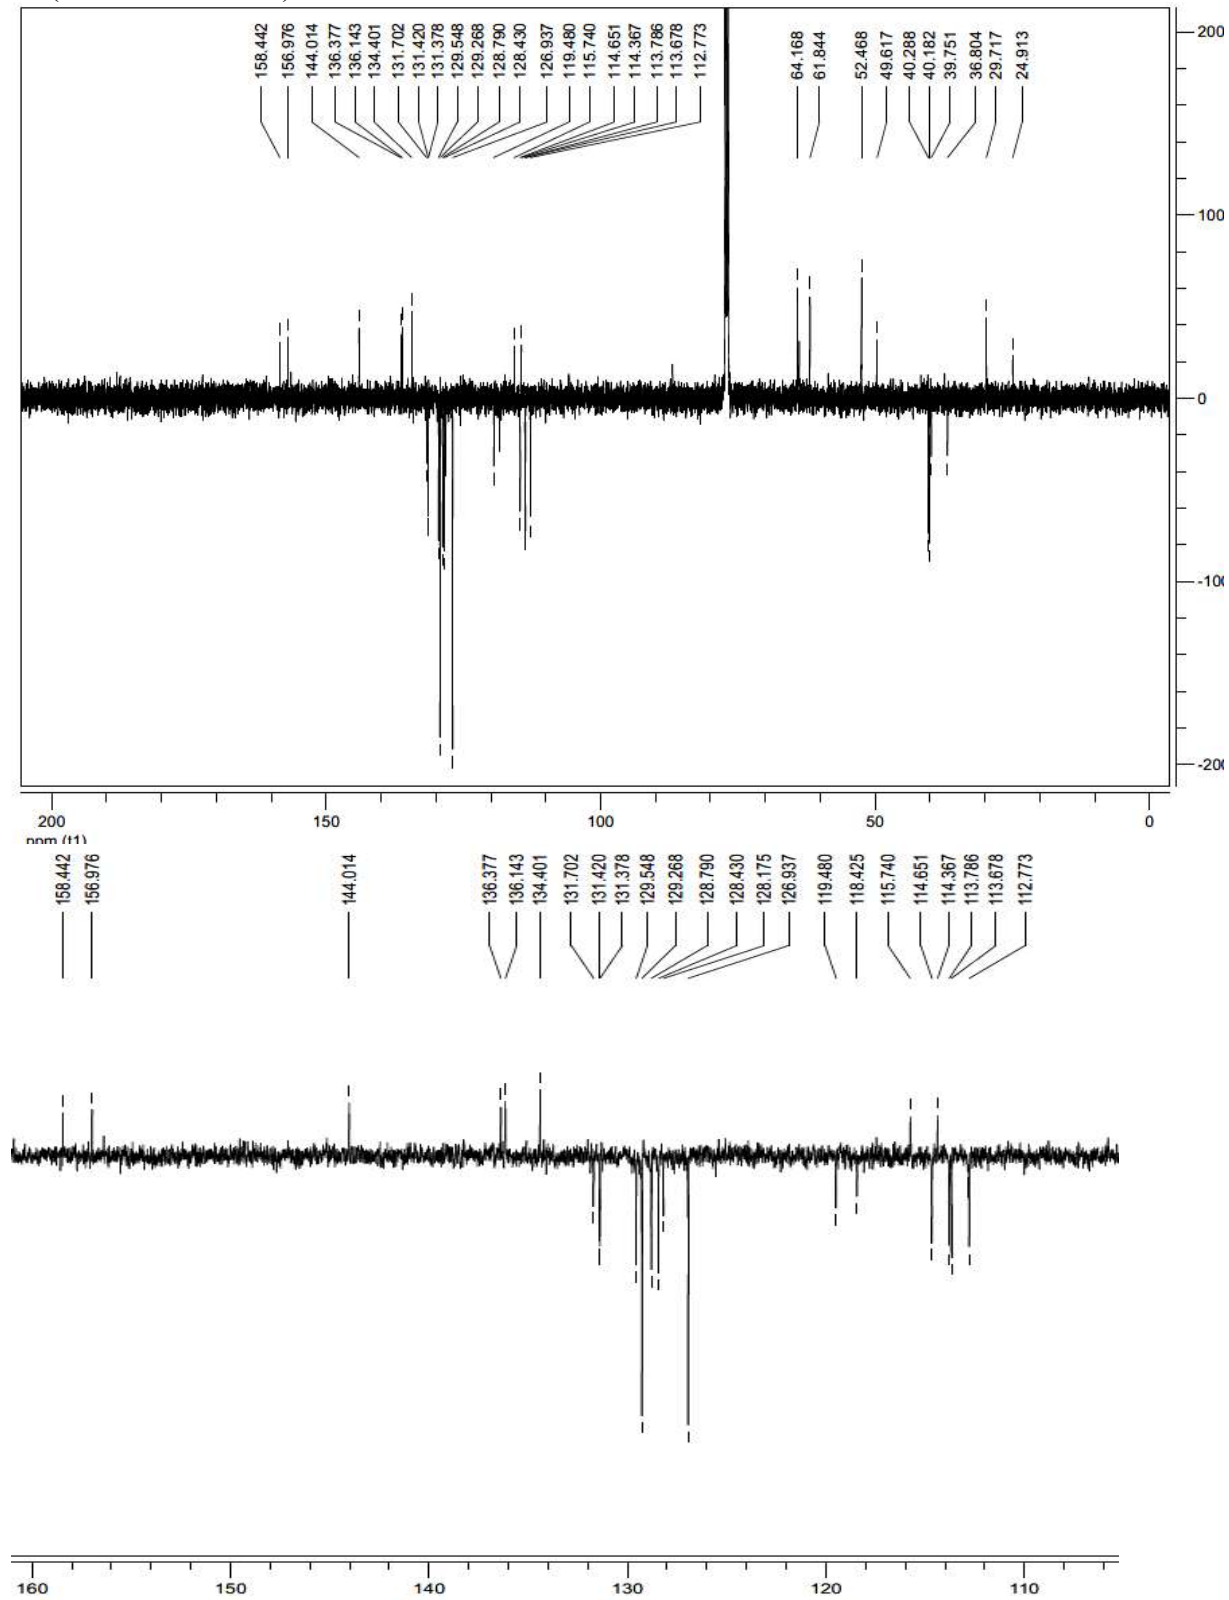

### Compound 60.

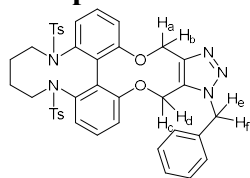

$\delta_H$  (500 MHz,  $CDCl_3$ )

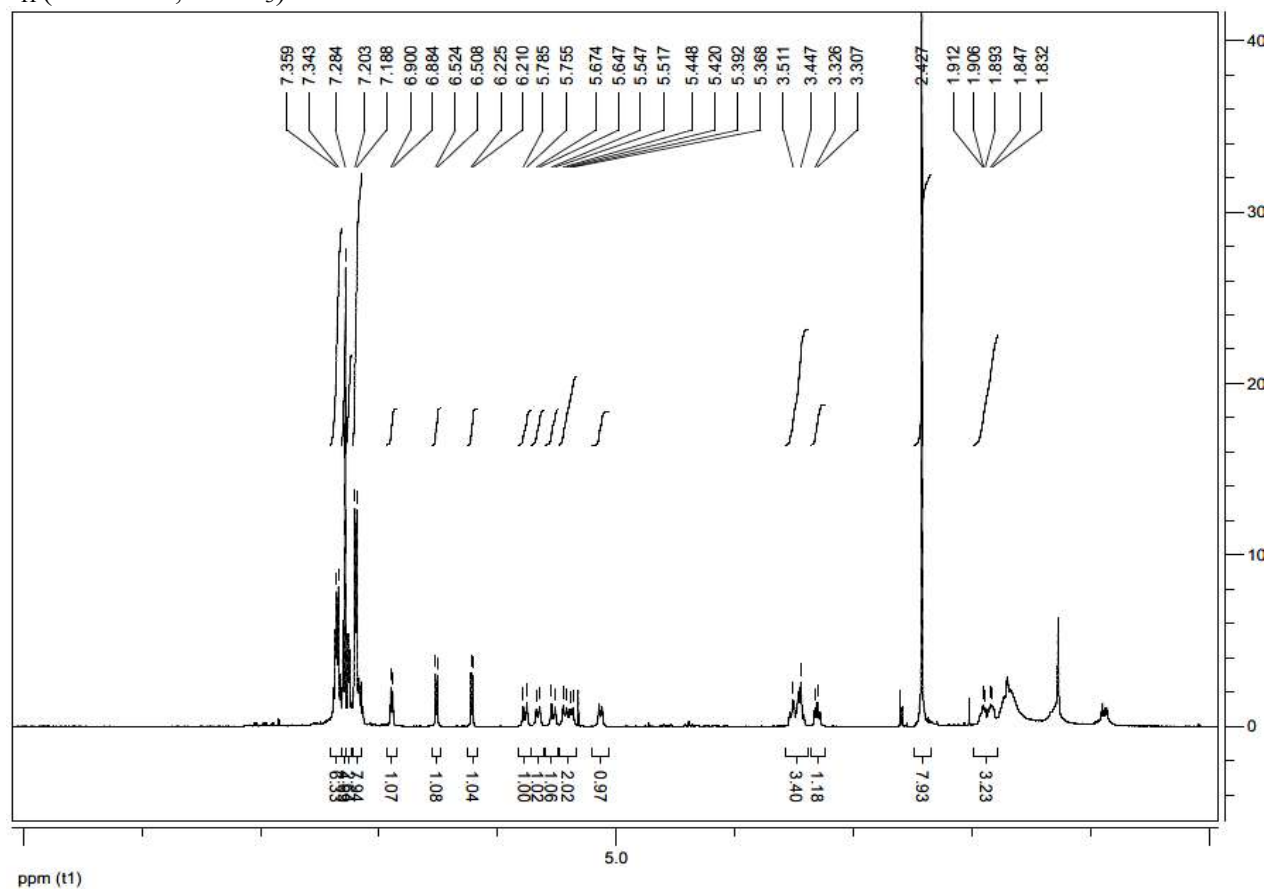

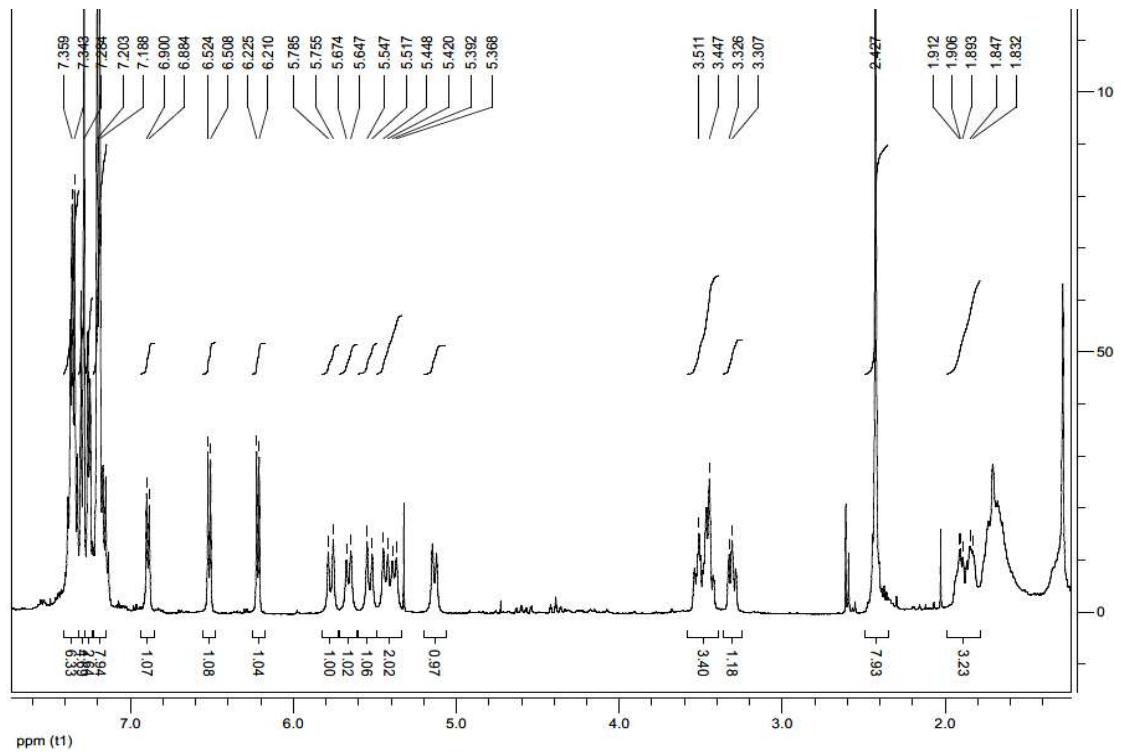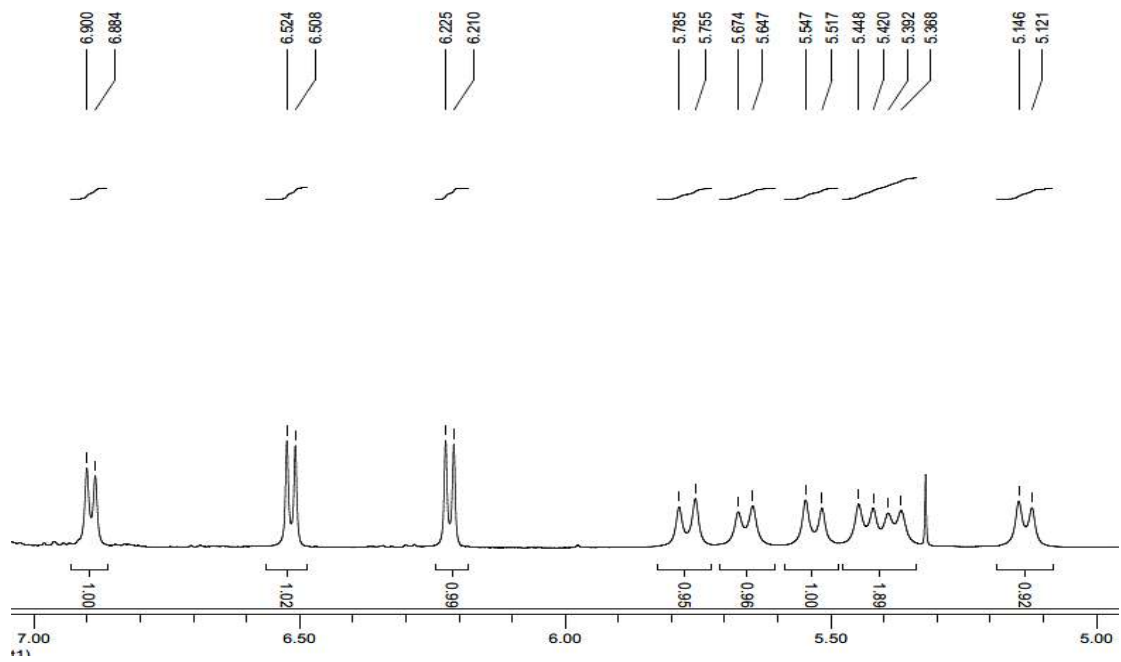

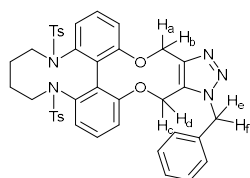

$\delta_C$  (126 MHz, CDCl<sub>3</sub>)

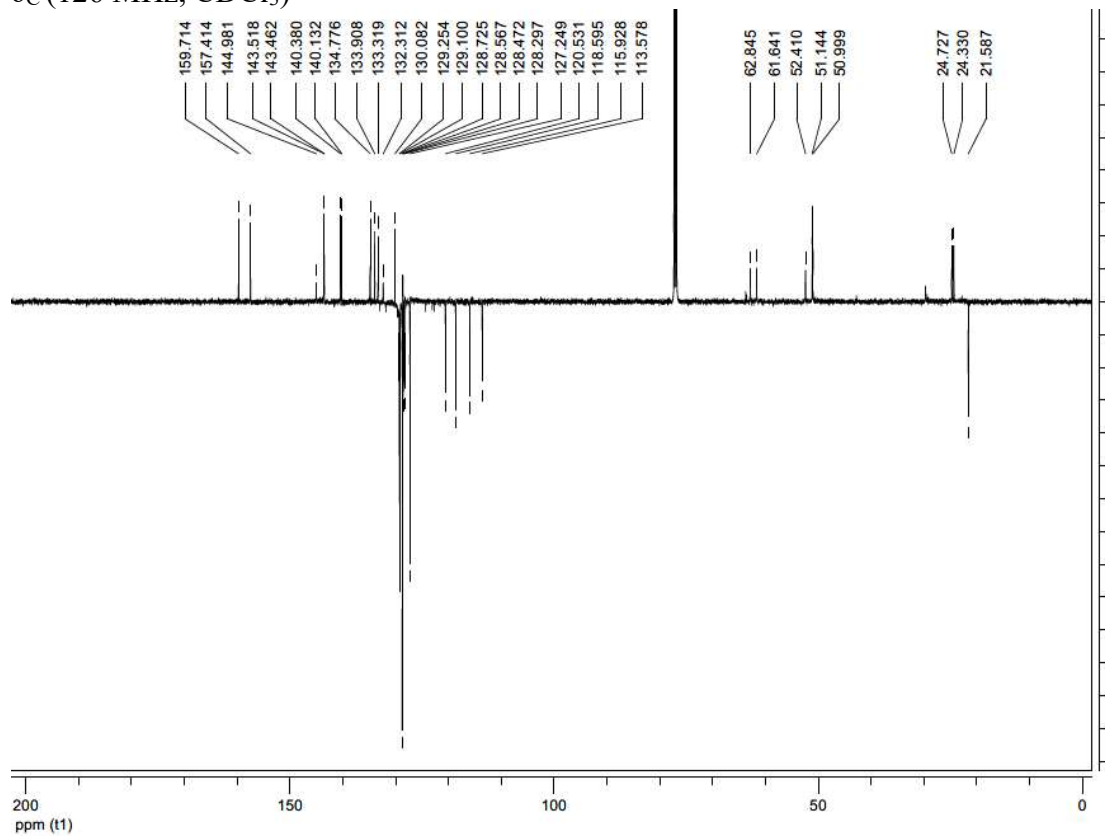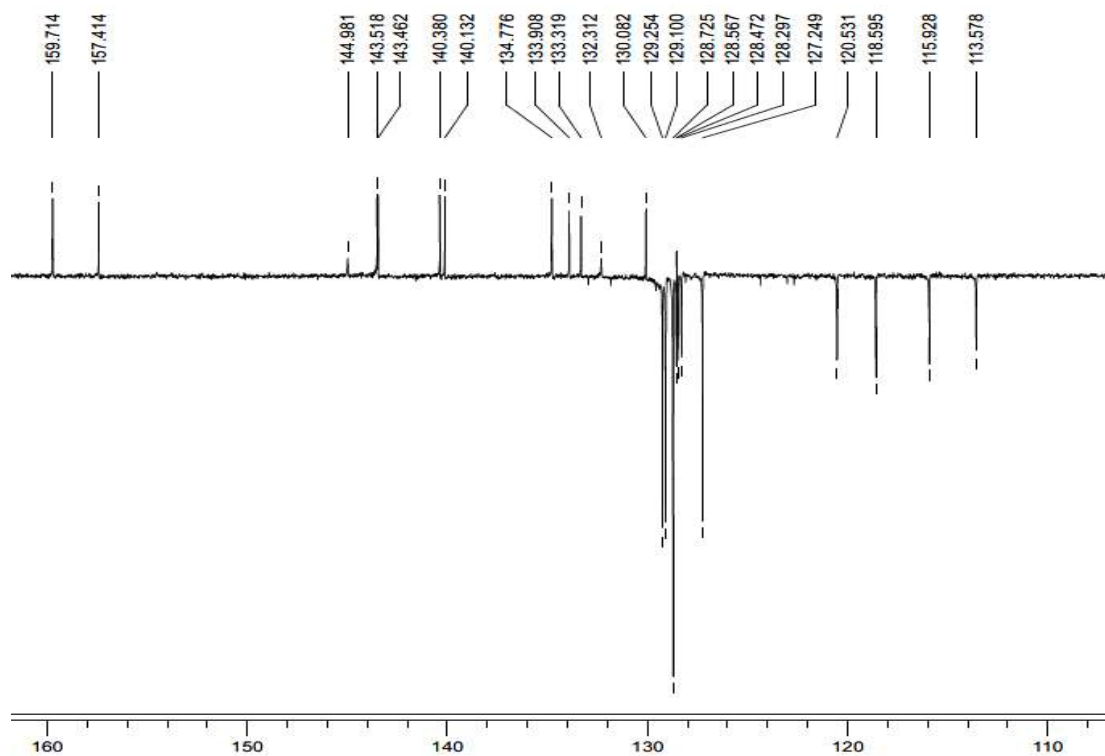

**Compound 61.**

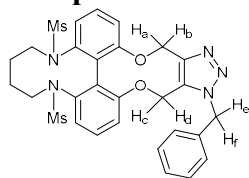

$\delta_H$  (500 MHz,  $CDCl_3$ )

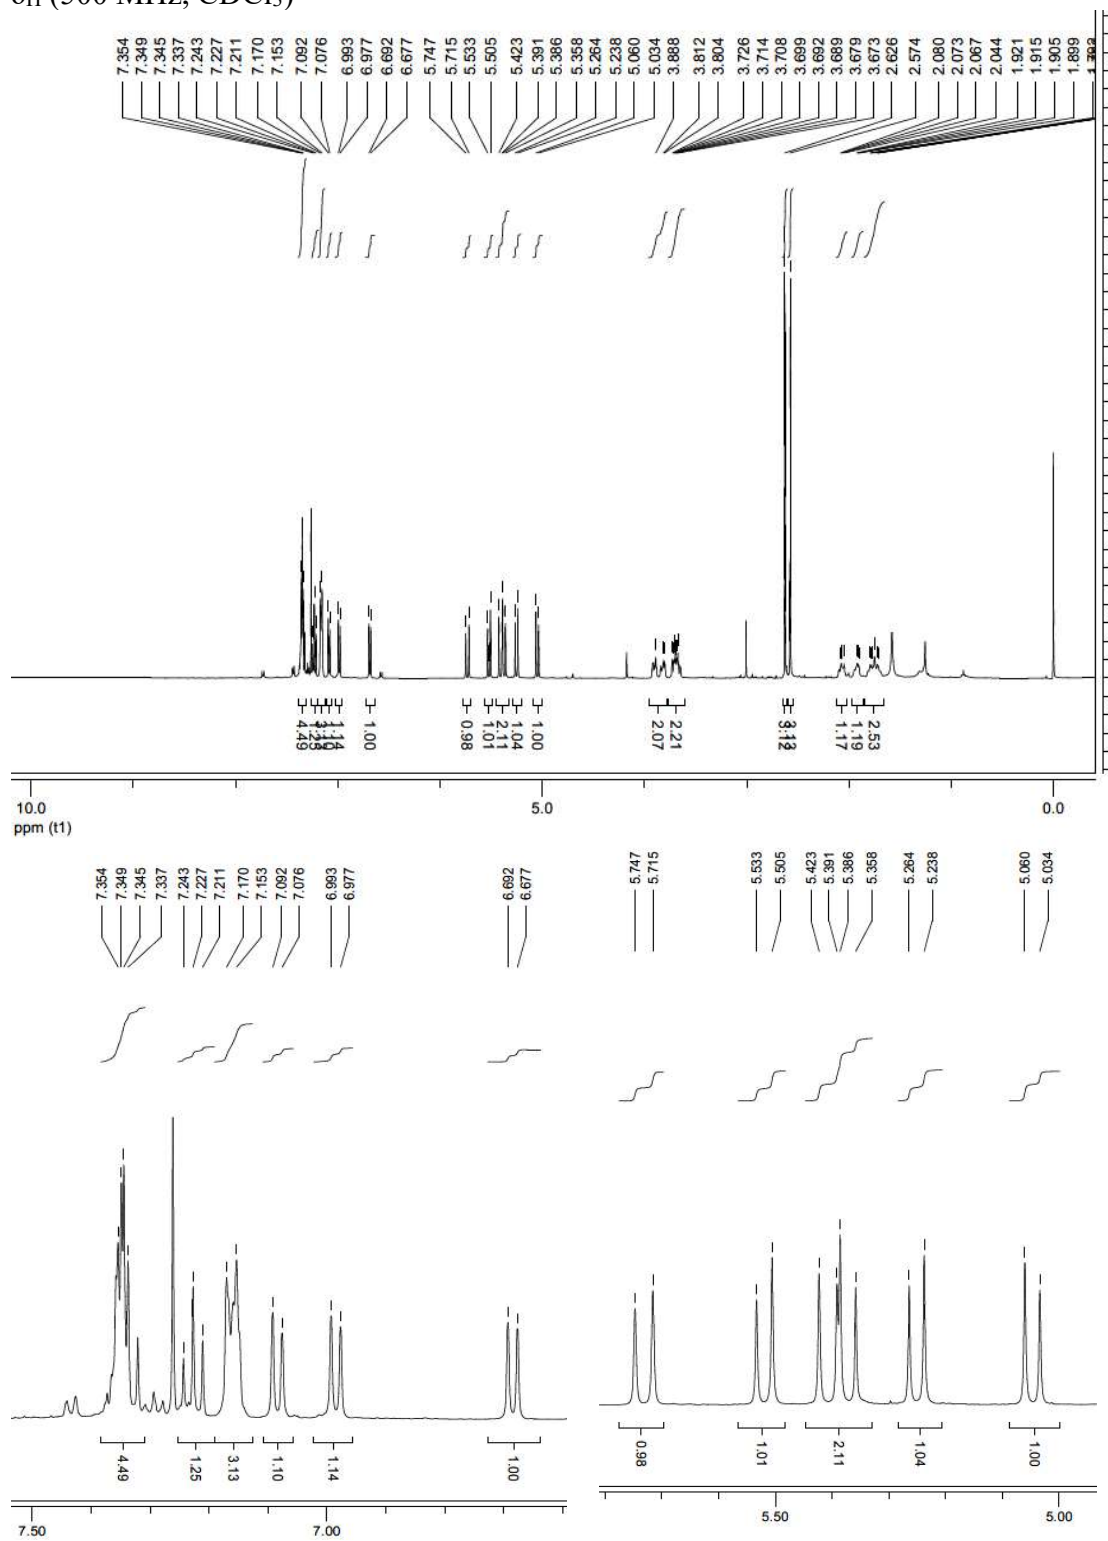



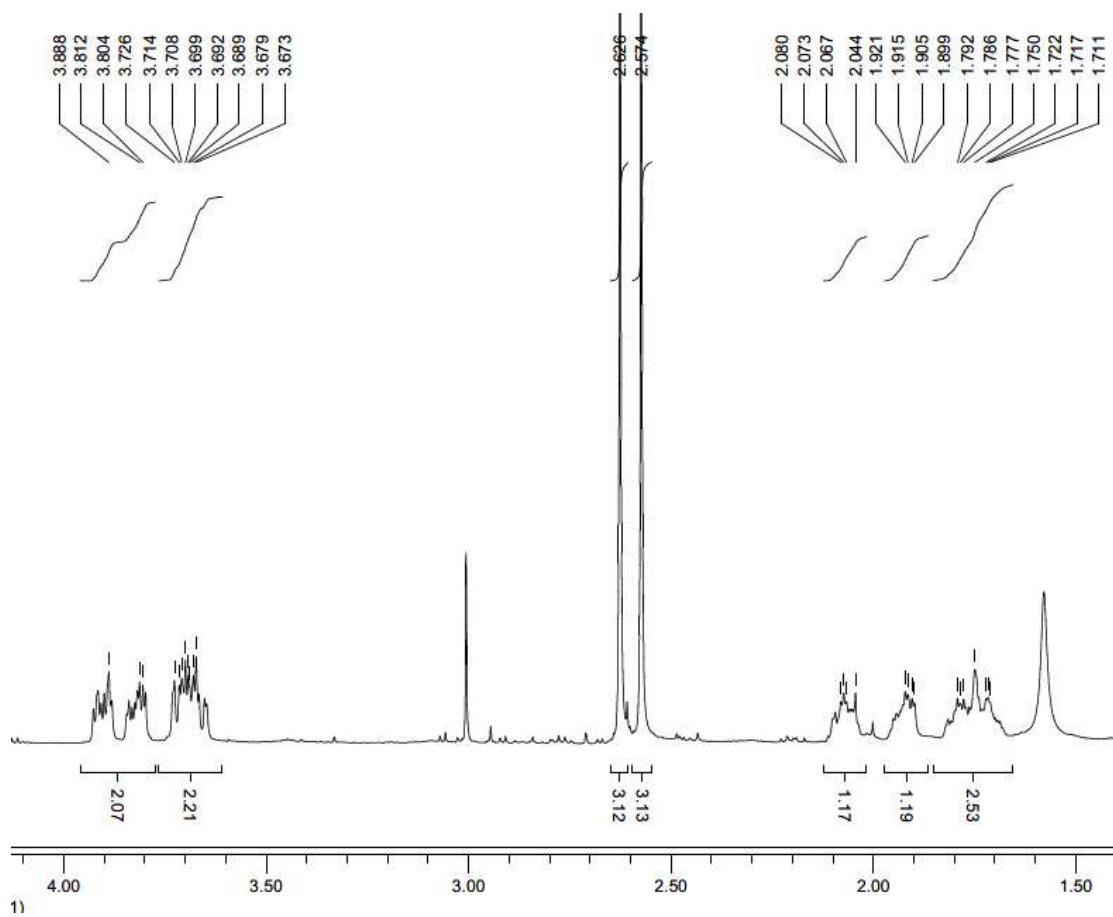

11

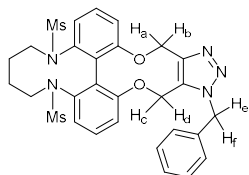

$\delta_C$  (125 MHz,  $CDCl_3$ )

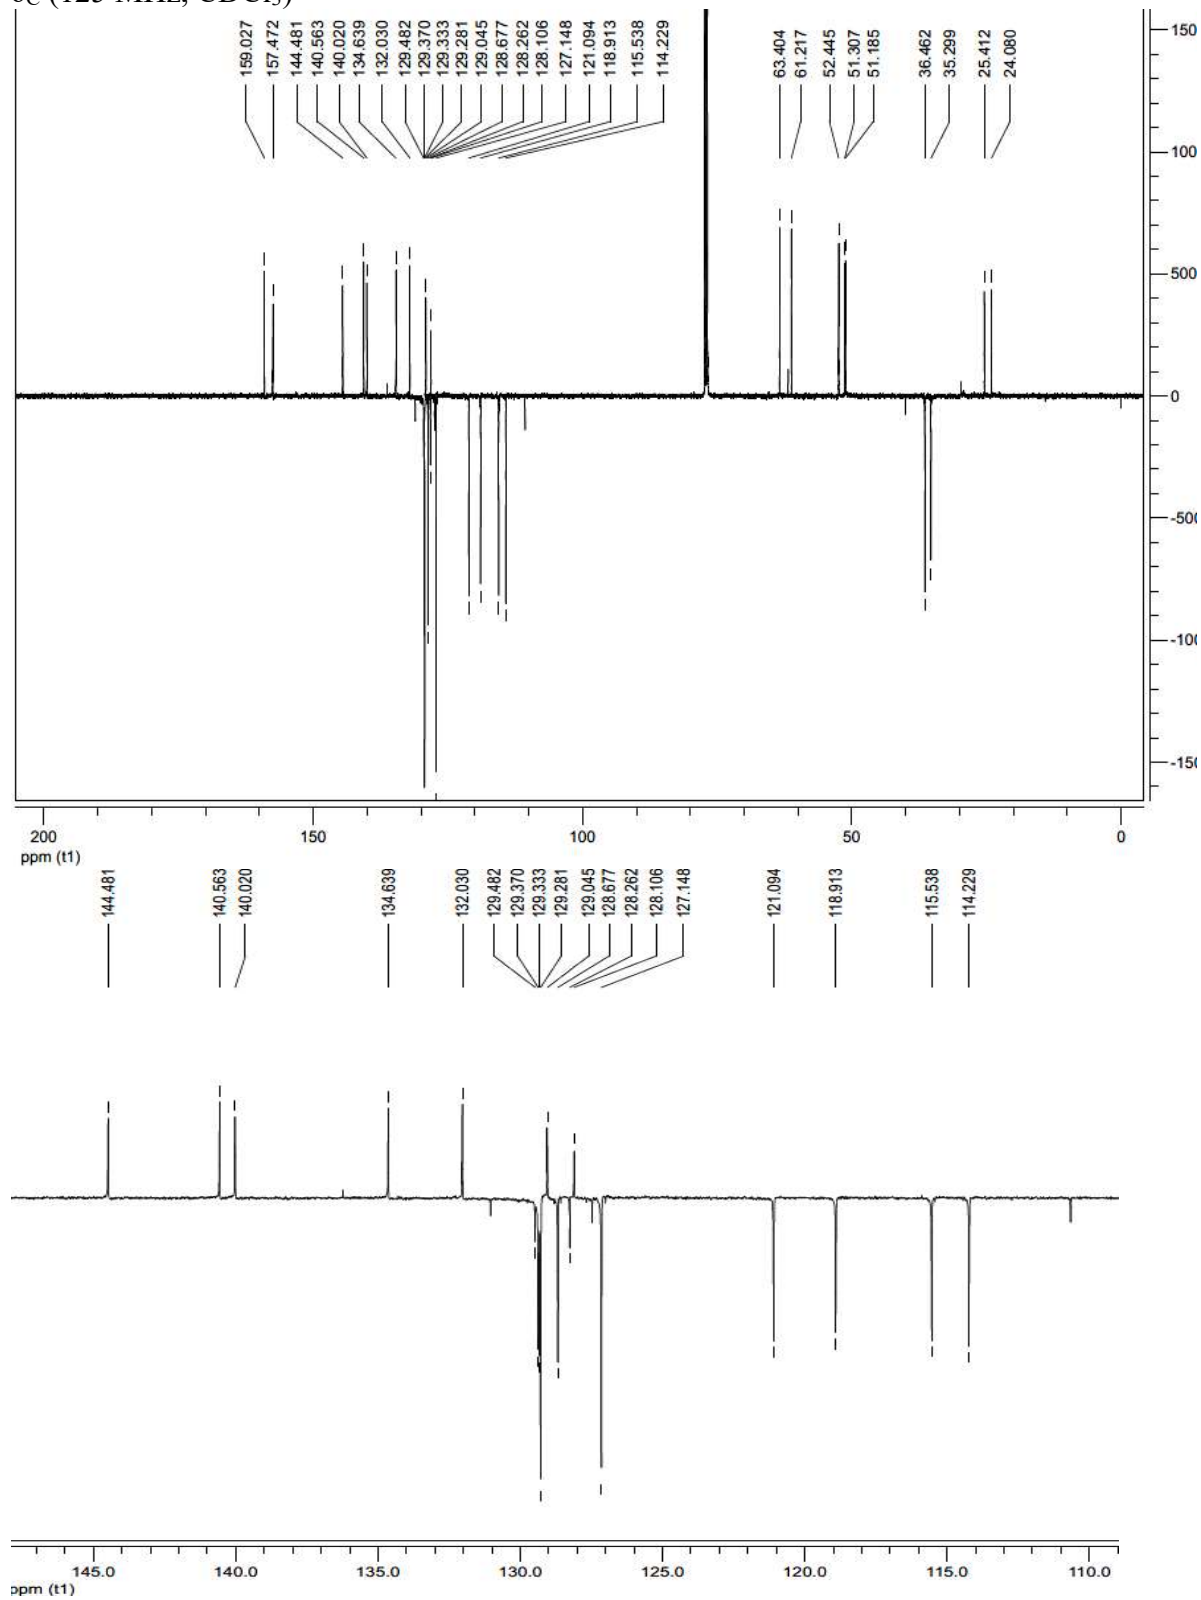

## X-ray structure data.

**Compound 29.** CCDC Deposition Number 2273606.

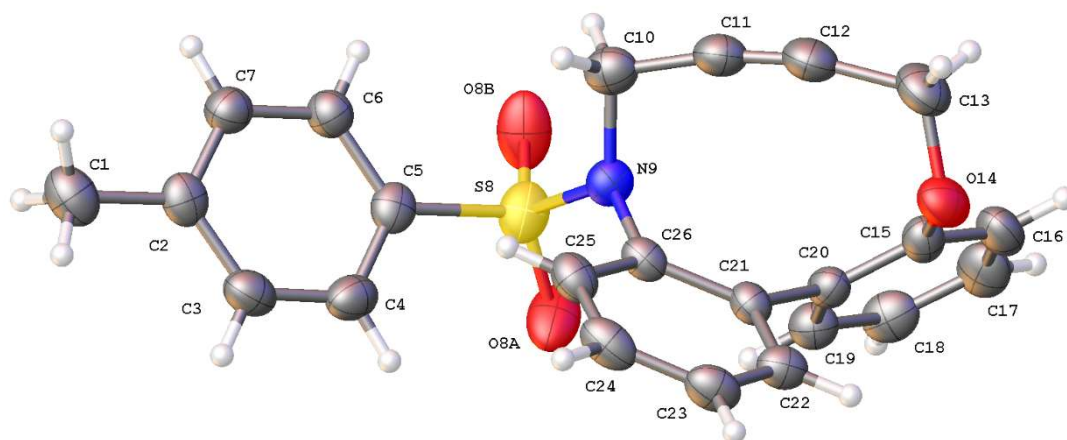

*solid state structure of Compound 29 with atom labelling and thermal ellipsoids drawn at 50% probability level*

### **Crystal structure determination of Compound 29.**

The asymmetric unit contains the strained alkyne, there are 4 in the unit cell. Angle between a mean plane through atoms C15 C16 C17 C18 C19 C20 to a mean plane through atoms C21 C22 C23 C24 C25 C26 is 64.194 ( 0.050 ) degrees.

### **Experimental**

Single crystals of  $C_{23}H_{19}NO_3S$  **Compound 29** were grown from **MeOH**. A suitable crystal was selected and mounted on a glass fibre with Fomblin oil and placed on an Xcalibur Gemini diffractometer with a Ruby CCD area detector. The crystal was kept at 150(2) K during data collection. Using Olex2 [1], the structure was solved with the ShelXT [2] structure solution program using Intrinsic Phasing and refined with the ShelXL [3] refinement package using Least Squares minimisation.

**Crystal Data** for  $C_{23}H_{19}NO_3S$  ( $M = 389.45$  g/mol): monoclinic, space group  $P2_1/c$  (no. 14),  $a = 15.14881(14)$  Å,  $b = 8.79337(7)$  Å,  $c = 15.81288(19)$  Å,  $\beta = 112.2723(12)^\circ$ ,  $V = 1949.27(4)$  Å<sup>3</sup>,  $Z = 4$ ,  $T = 150(2)$  K,  $\mu(\text{CuK}\alpha) = 1.669$  mm<sup>-1</sup>,  $D_{\text{calc}} = 1.327$  g/cm<sup>3</sup>, 26230 reflections measured ( $11.324^\circ \leq 2\theta \leq 179.506^\circ$ ), 4102 unique ( $R_{\text{int}} = 0.0497$ ,  $R_{\text{sigma}} = 0.0325$ ) which were used in all calculations. The final  $R_1$  was 0.0469 ( $I > 2\sigma(I)$ ) and  $wR_2$  was 0.1333 (all data).

|                     |                     |
|---------------------|---------------------|
| Identification code | sf2                 |
| Empirical formula   | $C_{23}H_{19}NO_3S$ |
| Formula weight      | 389.45              |
| Temperature/K       | 150(2)              |
| Crystal system      | Monoclinic          |
| Space group         | $P2_1/c$            |
| a/Å                 | 15.14881(14)        |
| b/Å                 | 8.79337(7)          |

|                                                |                                                                  |
|------------------------------------------------|------------------------------------------------------------------|
| c/Å                                            | 15.81288(19)                                                     |
| $\alpha/^\circ$                                | 90                                                               |
| $\beta/^\circ$                                 | 112.2723(12)                                                     |
| $\gamma/^\circ$                                | 90                                                               |
| Volume/Å <sup>3</sup>                          | 1949.27(4)                                                       |
| Z                                              | 4                                                                |
| $\rho_{\text{calc}}/\text{g}/\text{cm}^3$      | 1.327                                                            |
| $\mu/\text{mm}^{-1}$                           | 1.669                                                            |
| F(000)                                         | 816.0                                                            |
| Crystal size/mm <sup>3</sup>                   | 0.12 × 0.12 × 0.06 colourless block                              |
| Radiation                                      | CuK $\alpha$ ( $\lambda = 1.54184$ )                             |
| 2 $\Theta$ range for data collection/ $^\circ$ | 11.324 to 179.506                                                |
| Index ranges                                   | -19 ≤ h ≤ 19, -11 ≤ k ≤ 10, -19 ≤ l ≤ 14                         |
| Reflections collected                          | 26230                                                            |
| Independent reflections                        | 4102 [ $R_{\text{int}} = 0.0497$ , $R_{\text{sigma}} = 0.0325$ ] |
| Data/restraints/parameters                     | 4102/0/254                                                       |
| Goodness-of-fit on F <sup>2</sup>              | 1.056                                                            |
| Final R indexes [ $I > 2\sigma(I)$ ]           | $R_1 = 0.0469$ , $wR_2 = 0.1271$                                 |
| Final R indexes [all data]                     | $R_1 = 0.0521$ , $wR_2 = 0.1333$                                 |
| Largest diff. peak/hole / e Å <sup>-3</sup>    | 0.73/-0.44                                                       |

1. Dolomanov, O.V., Bourhis, L.J., Gildea, R.J, Howard, J.A.K. & Puschmann, H. (2009), *J. Appl. Cryst.* 42, 339-341.
2. Sheldrick, G.M. (2015). *Acta Cryst.* A71, 3-8.
3. Sheldrick, G.M. (2015). *Acta Cryst.* C71, 3-8.



- i) As the angle between mean planes through the two aromatic rings. Atoms used to define the mean planes through either aromatic ring was C7 C8 C9 C10 C11 C12 and C13 C14 C15 C16 C17 C18. Angle between mean planes 64.677 (0.046) degrees.
- ii) As the dihedral angle using the atoms C11 – C12 – C13 – C18 is -64.55 (0.24) degrees. Angle between the two oxygens in the ring is O1 to O6 is 4.2570 (0.0017) Angstroms.

### Experimental

Single crystals of C<sub>16</sub>H<sub>10</sub>N<sub>2</sub>O<sub>6</sub> Compound **49** were grown from MeOH. A suitable crystal was selected and mounted on a Mitegen head with Fomblin oil and placed on a Rigaku Oxford Diffraction Synergy-S diffractometer with a dual source equipped with a Hybrid pixel array detector. The crystal was kept at 100(2) K during data collection. Using Olex2 [1], the structure was solved with the SHELXT [2] structure solution program using Intrinsic Phasing and refined with the SHELXL [3] refinement package using Least Squares minimisation.

**Crystal Data** for C<sub>16</sub>H<sub>10</sub>N<sub>2</sub>O<sub>6</sub> ( $M = 326.26$  g/mol): orthorhombic, space group Pbc<sub>a</sub> (no. 61),  $a = 13.2109(2)$  Å,  $b = 7.63020(10)$  Å,  $c = 27.8997(3)$  Å,  $V = 2812.34(6)$  Å<sup>3</sup>,  $Z = 8$ ,  $T = 100(2)$  K,  $\mu(\text{Cu K}\alpha) = 1.028$  mm<sup>-1</sup>,  $D_{\text{calc}} = 1.541$  g/cm<sup>3</sup>, 79612 reflections measured ( $6.336^\circ \leq 2\theta \leq 173.698^\circ$ ), 3102 unique ( $R_{\text{int}} = 0.0631$ ,  $R_{\text{sigma}} = 0.0179$ ) which were used in all calculations. The final  $R_1$  was 0.0461 ( $I > 2\sigma(I)$ ) and  $wR_2$  was 0.1432 (all data).

|                                            |                                                               |
|--------------------------------------------|---------------------------------------------------------------|
| Identification code                        | Sf7                                                           |
| Empirical formula                          | C <sub>16</sub> H <sub>10</sub> N <sub>2</sub> O <sub>6</sub> |
| Formula weight                             | 326.26                                                        |
| Temperature/K                              | 100(2)                                                        |
| Crystal system                             | orthorhombic                                                  |
| Space group                                | Pbc <sub>a</sub>                                              |
| a/Å                                        | 13.2109(2)                                                    |
| b/Å                                        | 7.63020(10)                                                   |
| c/Å                                        | 27.8997(3)                                                    |
| $\alpha/^\circ$                            | 90                                                            |
| $\beta/^\circ$                             | 90                                                            |
| $\gamma/^\circ$                            | 90                                                            |
| Volume/Å <sup>3</sup>                      | 2812.34(6)                                                    |
| Z                                          | 8                                                             |
| $\rho_{\text{calc}}/\text{mg}/\text{mm}^3$ | 1.541                                                         |
| $\mu/\text{mm}^{-1}$                       | 1.028                                                         |
| F(000)                                     | 1344.0                                                        |
| Crystal size/mm <sup>3</sup>               | 0.2 × 0.1 × 0.01 colourless block                             |
| 2 $\theta$ range for data collection       | 6.336 to 173.698°                                             |
| Index ranges                               | -16 ≤ h ≤ 16, -9 ≤ k ≤ 9, -35 ≤ l ≤ 35                        |
| Reflections collected                      | 79612                                                         |
| Independent reflections                    | 3102[R(int) = 0.0631]                                         |
| Data/restraints/parameters                 | 3102/0/217                                                    |

|                                                |                                  |
|------------------------------------------------|----------------------------------|
| Goodness-of-fit on $F^2$                       | 1.177                            |
| Final R indexes [ $I \geq 2\sigma(I)$ ]        | $R_1 = 0.0461$ , $wR_2 = 0.1262$ |
| Final R indexes [all data]                     | $R_1 = 0.0523$ , $wR_2 = 0.1432$ |
| Largest diff. peak/hole / $e \text{ \AA}^{-3}$ | 0.26/-0.34                       |

1. Dolomanov, O.V., Bourhis, L.J., Gildea, R.J, Howard, J.A.K. & Puschmann, H. (2009), *J. Appl. Cryst.* 42, 339-341.
2. Sheldrick, G.M. (2015). *Acta Cryst.* A71, 3-8.
3. Sheldrick, G.M. (2015). *Acta Cryst.* C71, 3-8.

**Compound 54.** CCDC Deposition Number 2273608.

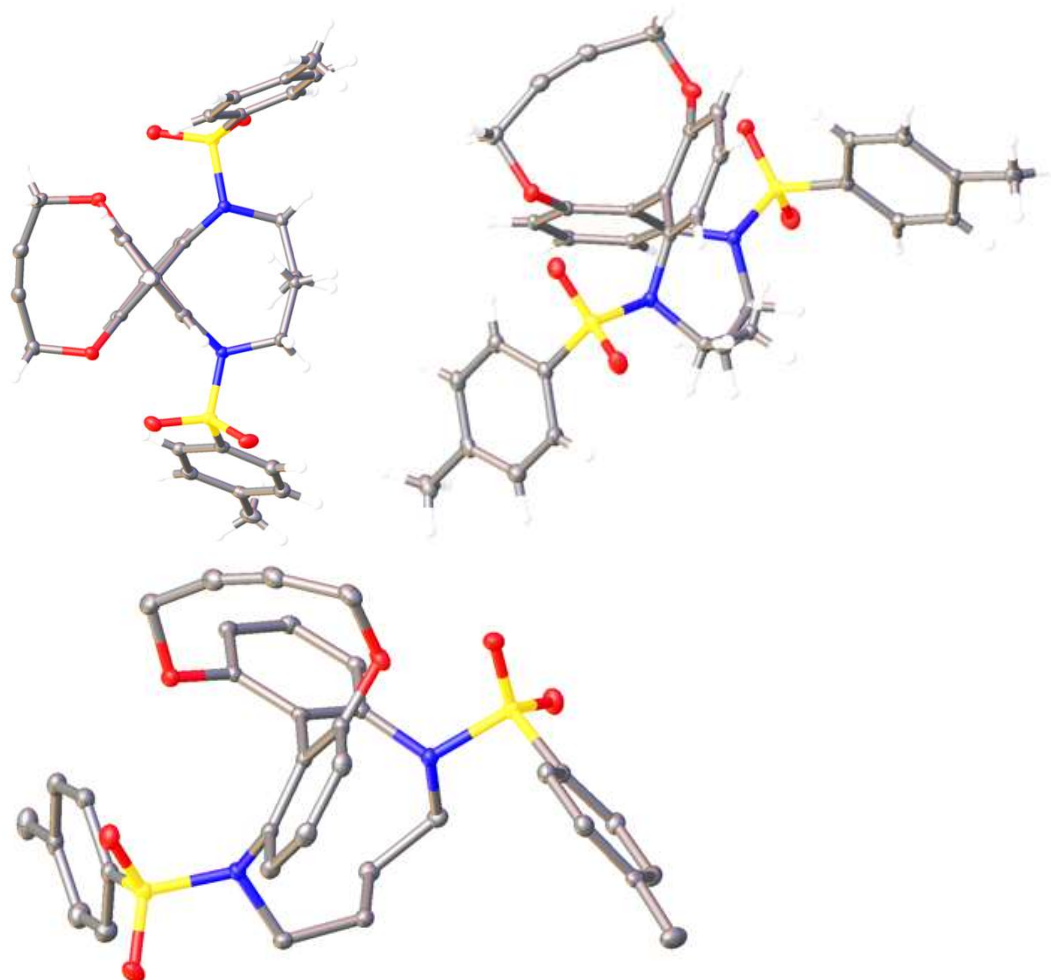

*Views of compound 54 to illustrate extend of alkyne bending, position of C4 bridging chain and the tosyl groups.*

#### **Crystal structure determination of Compound 54.**

There are two molecules in the asymmetric unit, like one of each stereoisomer around the biaryl bond. There are very small variations in bond angles between the two molecules as well as the stereo-inversion. There are four molecules in the unit cell related by an inversion centre.

The bond angles in the alkyne:

- 162.82 ( 0.16) C127 - C128 - C129
- 163.78 ( 0.16) C128 - C129 - C130
- 163.15 ( 0.16) C227 - C228 - C229
- 164.56 ( 0.16) C228 - C229 - C230

Using mean planes through the relevant aromatic rings to measure biaryl angle. This is described as atoms used to define the mean plane and the angle between these mean planes. Angle between mean plane through C114 C115 C116 C117 C118 C119 to mean plane through C120 C121 C122 C123 C124 C125 is (with approximate esd) = 79.644 (0.044). Angle between mean plane through C214 C215 C216 C217 C218 C219 to mean plane through C220 C221 C222 C223 C224 C225 is (with approximate



esd) = 78.562 (0.044). The small difference are likely crystal packing effects as the mirror image of these two enantiomers is also in the unit cell.

### Experimental

Single crystals of  $C_{34}H_{32}N_2O_6S_2$  **Compound 54** were grown from methanol. A suitable crystal was selected and mounted on a glass fibre with Fomblin oil and placed on a Rigaku Oxford Diffraction SuperNova diffractometer with a dual source (Cu at zero) equipped with an AtlasS2 CCD area detector. The crystal was kept at 150(2) K during data collection. Using Olex2 [1], the structure was solved with the SHELXT [2] structure solution program using Intrinsic Phasing and refined with the SHELXL [3]

**Crystal Data** for  $C_{34}H_{32}N_2O_6S_2$  ( $M = 628.73$  g/mol): triclinic, space group P-1 (no. 2),  $a = 10.96210(10)$  Å,  $b = 17.2319(2)$  Å,  $c = 17.6310(2)$  Å,  $\alpha = 90.8900(10)^\circ$ ,  $\beta = 108.0600(10)^\circ$ ,  $\gamma = 105.6680(10)^\circ$ ,  $V = 3030.74(6)$  Å<sup>3</sup>,  $Z = 4$ ,  $T = 150(2)$  K,  $\mu(\text{Cu K}\alpha) = 2.004$  mm<sup>-1</sup>,  $D_{\text{calc}} = 1.378$  g/cm<sup>3</sup>, 146215 reflections measured ( $5.304^\circ \leq 2\theta \leq 147.292^\circ$ ), 12178 unique ( $R_{\text{int}} = 0.0632$ ,  $R_{\text{sigma}} = 0.0203$ ) which were used in all calculations. The final  $R_1$  was 0.0333 ( $I > 2\sigma(I)$ ) and  $wR_2$  was 0.0921 (all data).

|                                            |                                          |
|--------------------------------------------|------------------------------------------|
| Identification code                        | MW14                                     |
| Empirical formula                          | $C_{34}H_{32}N_2O_6S_2$                  |
| Formula weight                             | 628.73                                   |
| Temperature/K                              | 150(2)                                   |
| Crystal system                             | triclinic                                |
| Space group                                | P-1                                      |
| a/Å                                        | 10.96210(10)                             |
| b/Å                                        | 17.2319(2)                               |
| c/Å                                        | 17.6310(2)                               |
| $\alpha/^\circ$                            | 90.8900(10)                              |
| $\beta/^\circ$                             | 108.0600(10)                             |
| $\gamma/^\circ$                            | 105.6680(10)                             |
| Volume/Å <sup>3</sup>                      | 3030.74(6)                               |
| Z                                          | 4                                        |
| $\rho_{\text{calc}}/\text{mg}/\text{mm}^3$ | 1.378                                    |
| $\mu/\text{mm}^{-1}$                       | 2.004                                    |
| F(000)                                     | 1320.0                                   |
| Crystal size/mm <sup>3</sup>               | 0.12 × 0.12 × 0.06 colourless block      |
| 2 $\theta$ range for data collection       | 5.304 to 147.292°                        |
| Index ranges                               | -13 ≤ h ≤ 13, -21 ≤ k ≤ 21, -21 ≤ l ≤ 21 |
| Reflections collected                      | 146215                                   |
| Independent reflections                    | 12178 [ $R_{\text{int}} = 0.0632$ ]      |
| Data/restraints/parameters                 | 12178/0/797                              |
| Goodness-of-fit on F <sup>2</sup>          | 1.020                                    |
| Final R indexes [ $I > 2\sigma(I)$ ]       | $R_1 = 0.0333$ , $wR_2 = 0.0894$         |
| Final R indexes [all data]                 | $R_1 = 0.0364$ , $wR_2 = 0.0921$         |

|                                             |            |
|---------------------------------------------|------------|
| Largest diff. peak/hole / e Å <sup>-3</sup> | 0.36/-0.37 |
|---------------------------------------------|------------|

1. Dolomanov, O.V., Bourhis, L.J., Gildea, R.J, Howard, J.A.K. & Puschmann, H. (2009), *J. Appl. Cryst.* 42, 339-341.
2. Sheldrick, G.M. (2015). *Acta Cryst.* A71, 3-8.
3. Sheldrick, G.M. (2015). *Acta Cryst.* C71, 3-8.

**Compound 56.** CCDC Deposition Number 2273609

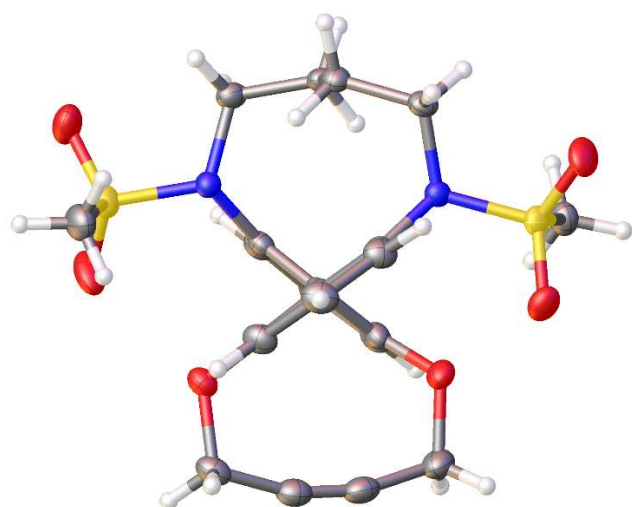

*Solid state structure of 56 looking down the biphenyl axis. Thermal ellipsoids are drawn at 50% probability level*

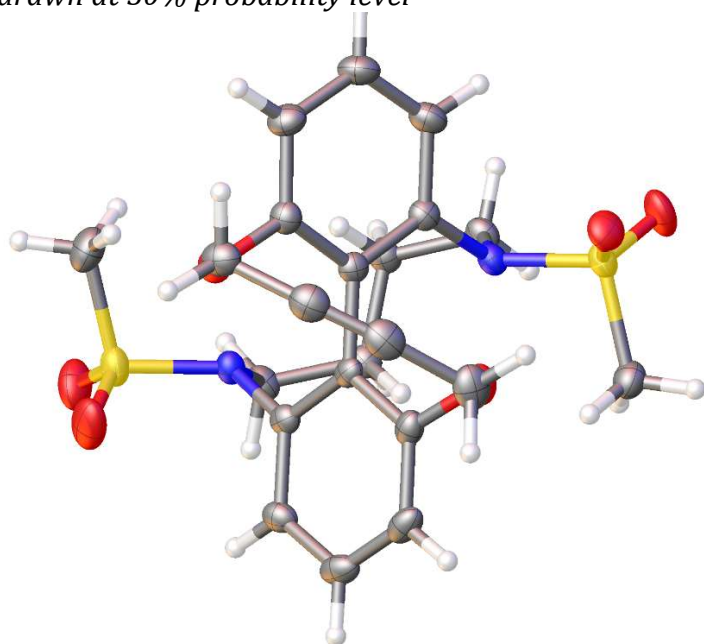

*A view of 56 looking roughly straight down the strained alkyne across the biphenyl bond to the butyl chain below*

**Crystal structure determination of 56.**

The asymmetric unit contains the alkyne, there are four molecules in the unit cell. Both handedness of rotomers around the biphenyl bond are in the cell related by centres. The angle between the two phenyl rings is defined by the angle between mean planes through the two rings. This is described as the atoms used to define the rings and the angle between the mean planes through them. The angle between mean plane through ring C9 C10 C11 C12 C13 C14 and ring C7 C8 C21 C22 C23 C24 is 74.543 (0.050) degrees.

## Experimental

Single crystals of  $C_{22}H_{24}N_2O_6S_2$  **56** were grown from DCM. A suitable crystal was selected and mounted on a Mitegen head with Fomblin oil and placed on a Rigaku Oxford Diffraction Synergy-S diffractometer with a dual source equipped with a HyPix-Arc 100 pixel hybrid photon counting X-ray detector. The crystal was kept at 100(2) K during data collection. Using Olex2 [1], the structure was solved with the SHELXS [2] structure solution program using Direct Methods and refined with the SHELXL [3] refinement package using Least Squares minimisation.

**Crystal Data** for  $C_{22}H_{24}N_2O_6S_2$  ( $M = 476.55$  g/mol): monoclinic, space group  $P2_1/c$  (no. 14),  $a = 13.6603(3)$  Å,  $b = 11.3987(2)$  Å,  $c = 14.7403(3)$  Å,  $\beta = 106.075(2)^\circ$ ,  $V = 2205.45(7)$  Å<sup>3</sup>,  $Z = 4$ ,  $T = 100(2)$  K,  $\mu(\text{Cu K}\alpha) = 2.558$  mm<sup>-1</sup>,  $D_{\text{calc}} = 1.435$  g/cm<sup>3</sup>, 64880 reflections measured ( $9.96^\circ \leq 2\theta \leq 156.876^\circ$ ), 4739 unique ( $R_{\text{int}} = 0.0896$ ,  $R_{\text{sigma}} = 0.0335$ ) which were used in all calculations. The final  $R_1$  was 0.0407 ( $I > 2\sigma(I)$ ) and  $wR_2$  was 0.1049 (all data).

| <b>Table 1 Crystal data and structure refinement for 56.</b> |                                                                    |
|--------------------------------------------------------------|--------------------------------------------------------------------|
| Identification code                                          | mw50                                                               |
| Empirical formula                                            | $C_{22}H_{24}N_2O_6S_2$                                            |
| Formula weight                                               | 476.55                                                             |
| Temperature/K                                                | 100(2)                                                             |
| Crystal system                                               | monoclinic                                                         |
| Space group                                                  | $P2_1/c$                                                           |
| $a/\text{\AA}$                                               | 13.6603(3)                                                         |
| $b/\text{\AA}$                                               | 11.3987(2)                                                         |
| $c/\text{\AA}$                                               | 14.7403(3)                                                         |
| $\alpha/^\circ$                                              | 90                                                                 |
| $\beta/^\circ$                                               | 106.075(2)                                                         |
| $\gamma/^\circ$                                              | 90                                                                 |
| Volume/Å <sup>3</sup>                                        | 2205.45(7)                                                         |
| Z                                                            | 4                                                                  |
| $\rho_{\text{calc}}/\text{g/cm}^3$                           | 1.435                                                              |
| $\mu/\text{mm}^{-1}$                                         | 2.558                                                              |
| F(000)                                                       | 1000.0                                                             |
| Crystal size/mm <sup>3</sup>                                 | 0.12 × 0.06 × 0.02                                                 |
| Radiation                                                    | Cu K $\alpha$ ( $\lambda = 1.54184$ )                              |
| $2\theta$ range for data collection/ $^\circ$                | 9.96 to 156.876                                                    |
| Index ranges                                                 | $-17 \leq h \leq 17$ , $-14 \leq k \leq 14$ , $-18 \leq l \leq 18$ |
| Reflections collected                                        | 64880                                                              |
| Independent reflections                                      | 4739 [ $R_{\text{int}} = 0.0896$ , $R_{\text{sigma}} = 0.0335$ ]   |
| Data/restraints/parameters                                   | 4739/0/291                                                         |
| Goodness-of-fit on $F^2$                                     | 1.075                                                              |
| Final R indexes [ $I \geq 2\sigma(I)$ ]                      | $R_1 = 0.0407$ , $wR_2 = 0.1012$                                   |
| Final R indexes [all data]                                   | $R_1 = 0.0471$ , $wR_2 = 0.1049$                                   |
| Largest diff. peak/hole / e Å <sup>-3</sup>                  | 0.28/-0.48                                                         |

1. Dolomanov, O.V., Bourhis, L.J., Gildea, R.J, Howard, J.A.K. & Puschmann, H. (2009), *J. Appl. Cryst.* 42, 339-341.
2. Sheldrick, G.M. (2008). *Acta Cryst.* A64, 112-122.
3. Sheldrick, G.M. (2015). *Acta Cryst.* C71, 3-8.

## **Studies of binding to azide-functionalised proteins.**

Two runs of tests of an azide-labelled protein with strained alkynes were undertaken. The azide-labelled protein used for these tests was glutathione S-transferase (GST) containing an azidophenylalanine residue at position 52, allowing it to undergo click cycloaddition reaction with strained alkynes. The MW of the wild type is ca 29 kDa.

Sequence details:>GST (Highlighted position of azide incorporation is **F52-AzF**)  
MSPILGYWKI KGLVQPTRLLEYLEEKYEE HLYERDEGDK WRNKKFELGL  
EFPNLPYYID GDVKLTQSMA IIRYIADKHN MLGGCPKERA EISMLEGAVL  
DIRYGVSRIA YSKDFETLKV DFLSKLPEML KMFEDRLCHK TYLNGDHVTH  
PDFMLYDALD VVLYMDPMCL DAFPKLVCFK KRIEAIQID KYLKSSKYIA  
WPLQGWQATF GGGDHPPKSD LVPRGSPGIH RD

## **Materials and methods for the first set of attempted click reactions.**

### **Expression and induction of GST-WT and GST-F52TAG in *E. coli*.**

*E. coli* BL21-AI competent cells were used to produce GST with 52nd amino acid position replaced by TAG codon while *E. coli* BL21(DE3) was used for GST wild type expression. *E. coli* BL21(DE3) was transformed with plasmid pGex-5X1-WT expressing GST as the method described above for *E. coli* DH5 $\alpha$ . The transformed cells were amplified overnight in 15 to 20 mL of LB broth containing ampicillin at 1  $\mu$ g/mL at 36 °C with shaking at 200 rpm. The next day, the culture was diluted to an OD<sub>600</sub> at 0.2 in 100 mL of LB broth containing ampicillin. GST-WT was induced when the culture reached an OD<sub>600</sub> of 0.6 to 0.8 by the addition of IPTG to a final concentration of 0.5 mM, followed by four hours of incubation at 30 °C with shaking at 200 rpm. Cells were spun at 4,000 rpm for 20 minutes at 4 °C and washed with ice cold PBS containing phenylmethylsulfonyl fluoride (PMSF). The cells were spun down again and the pellets were kept at -20°C for storage.

GST-F52TAG was expressed in *E. coli*-BL21-AI. The competent cells were co-transformed with plasmids pDule2-pCNF to express orthogonal aaRS/tRNA pair under the control of AraC and with plasmid pGex-5X1-F52TAG expressing GST mutant. The cells were electroporated with 2.5 kV for a few seconds and recovered in 300  $\mu$ L of SOC medium. The cells were incubated at 36 °C for two hours with shaking at 850-900 rpm. Subsequently, the cells were added into 100 mL of ZY non-inducing media for overnight incubation at 36 °C with shaking at 300 rpm. The next day, 500  $\mu$ L of the culture was added into 100 mL of ZY autoinducing media with a final concentration of 1 mM IPTG, 1 mM AzF, 0.05% arabinose and 1  $\mu$ g/mL of spectinomycin. The ZY non-inducing and autoinducing medium were made as described by Peeler et al. (Peeler, J. C., & Mehl, R. A. (n.d.). *Site-specific incorporation of unnatural amino acids as probes for protein conformational changes*. In L. Pollegioni & S. Servi (Eds.), *Unnatural amino acids: Methods and protocols* (pp. 125–134). Totowa, NJ: Humana Press. doi: 10.1007/978-1-61779-331-8 8). The cells were collected as described above for the induction of GST-WT.

### **GST Pull Down Assay.**

For cell lysis, the pellets obtained from the protein induction were mixed with resuspension buffer with a final concentration of 2.5 mM Benzamidine, 1.0 mM PMSF, 1 mM EDTA, 1mM DTT, 1x protease inhibitor (50x protease inhibitor: one tablet of cComplete™, EDTA-free Protease Inhibitor Cocktail from COEDTAF-RO ROCHE

dissolved in 1 mL of ddH<sub>2</sub>O). After the addition of lysozyme to a final concentration of 1mg/mL, the suspension was kept on ice for 30 minutes. All the centrifugation was performed at 4 °C and the incubation was carried out on ice unless otherwise stated. Subsequently, the cells were sonicated (QSonica Sonicator Q125) on ice with 60% amplitude, pulse 15 seconds on and 5 seconds off, for 1 minute. Sonication was repeated for 6 to 10 times until about 75% of the cells were lysed. The lysate was chilled on ice for another 30 minutes with 1.0% Triton X100, followed by centrifugation at 15, 000 rpm for 20 minutes. The supernatant was retained as whole cell extract (WCE) and the pellet (PEL) was resuspended with the resuspension buffer.

For the pull-down of GST, sepharose beads were pre-washed with PBS containing 1% Triton X100 and spun down at 2, 000 rpm for 2 minutes for 4 to 6 times. WCE was mixed with the beads and rolled at 50 rpm for two hours. The mixture was spun down at 1, 500 rpm for 3 minutes after incubation. The supernatant (SUP) was sampled to check the GST-sepharose binding efficiency. The beads bound with GST were washed with PBS containing 0.1% Triton X100 for 6 to 8 times to remove the non-specific proteins. The GST was eluted for a few times with elution buffer with 50 mM Tris pH 8.0 and 10 mM glutathione as the final concentration. The centrifugation speed for the beads after bound with GST should not exceed 1,500 rpm. All the eluents (E1-E5) were collected and sampled to be resolved by SDS-PAGE together with WCE, PEL and SUP. After SDS-PAGE was performed, the gel was stained with Coomassie Brilliant Blue (CBB) to determine the amount of GST in the respective fractions.

A minimum of 30 ncAAs were successfully incorporated with high yield and fidelity in response to triplet or quadruplet codons in 2006 (Wang, L., Xie, J., & Schultz, P. G. (2006). *Expanding the Genetic Code. Annual Review of Biophysics and Biomolecular Structure.* doi: 10.1146/annurev.biophys.35.101105.121507). The Amber stop codon was chosen to encode ncAAs due to its low occurring frequency in *E. coli* of 7% (Nakamura, Y., Gojobori, T., & Ikemura, T. (2000). *Codon usage tabulated from international DNA sequence databases: status for the year 2000 [In Process Citation]. Nucleic Acids Res.* doi:10.1093/nar/28.1.292). It is a nonsense codon which does not specify any of the natural amino acids in most biological systems. A gel analysis showed that amber suppression has successfully rescued the expression of full-length GST-F52TAG expressed in *E. coli*, and this is illustrated below.

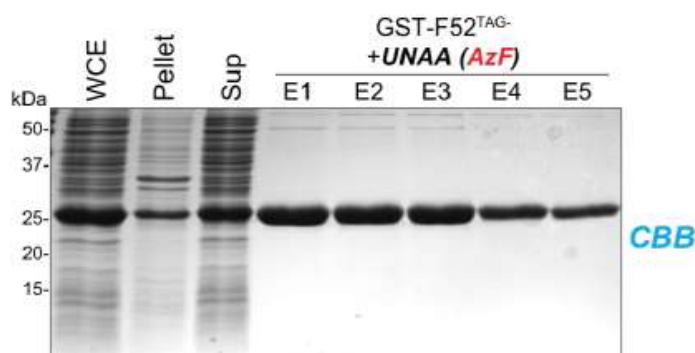

*GST-F52TAG* expressed in *E. coli* by amber suppression. WCE: whole cell extract, sup: supernatant obtained after GST bound to sepharose beads, E: eluent.

### Click Reaction of strained alkynes with GST-F52TAG.

The cycloaddition between 100  $\mu\text{M}$  of the alkyne probes and 50  $\mu\text{M}$  of GST-F52TAG was used to determine the minimum time and temperature required for the reaction. This would provide information for future applications as some proteins are sensitive to heat, thus, would be ideal to click at lower temperature. The strained alkynes and control molecules (see diagram below) were dissolved in DMSO to make a 5 mM stock concentration. Click reactions were run at 15  $\mu\text{L}$  per reaction with a final concentration of 50  $\mu\text{M}$  GST-F52TAG and 100  $\mu\text{M}$  of respective probes in PBS. The commercial DIBO dyes were obtained from Invitrogen™ Click-IT™ DIBO alkyne conjugated with respective Alexa Fluor™ 488, 555 and 647 for copper free click chemistry. Each of the probes was clicked with GST-52AzF. The experiment was run at 4 °C, 16 °C and room temperature 25 °C with shaking at 500 rpm for 2, 4, 6 and 8 hours respectively. After incubation, the samples were mixed with 5  $\mu\text{L}$  4x protein solubilisation buffer and boiled at 95 °C for 7 five minutes to be resolved by SDS-PAGE. The bands were visualised by SynGene PXI with respective filter modules.

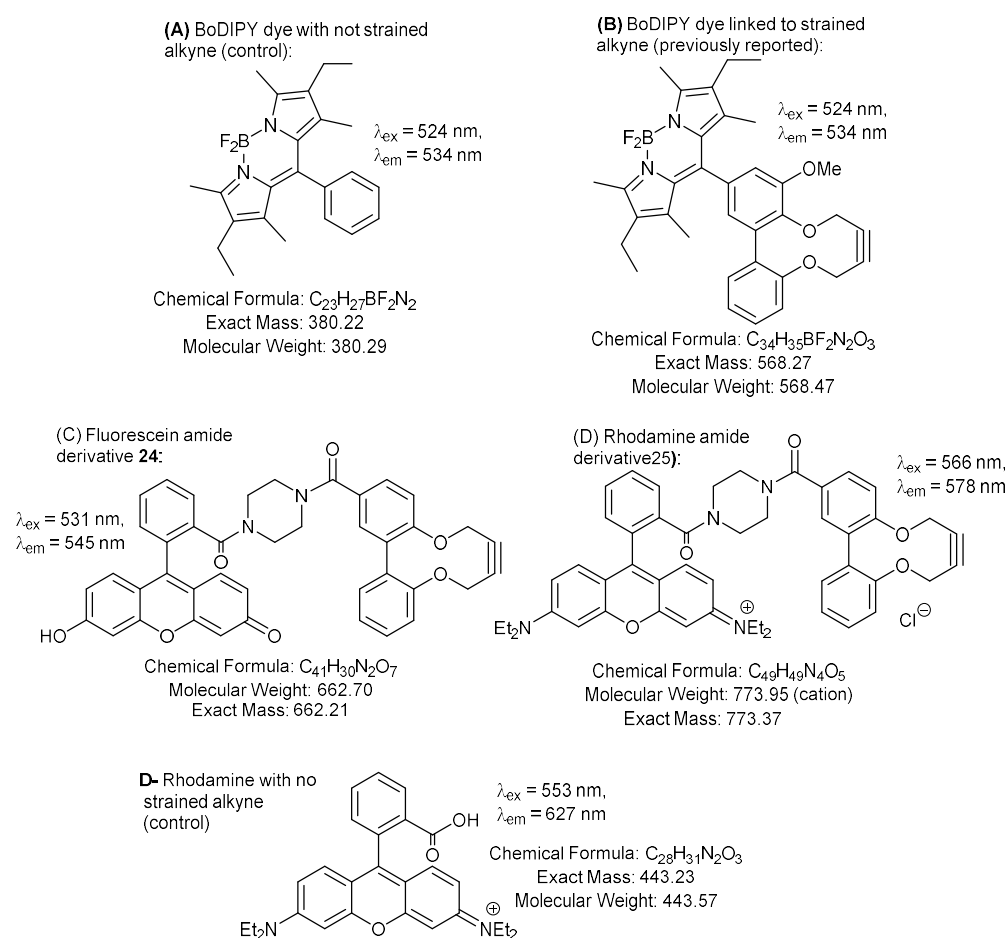

**Above:** Compound (A) contains a BoDIPY group but no strained alkyne and was a control compound for the previously-reported BoDIPY reagent (B). Compounds (C) and (D) are alkynes **24** and **25** respectively. Compound (D-) is a control for compound (D). Three commercial strained alkyne/dyes were also tested as controls for the reactions.

All the commercial fluorescent alkynes clicked with GST-F52TAG readily at room temperature and gave the strongest signals. Of the novel alkynes tested, compound D produced the best signal among the three fluorescent alkynes (B, C and D) when excited by light at wavelength 568 nm. The gels are shown in the Figure below. Control



compound A showed minimal non-specific binding. In addition, weak fluorescence was also observed in DIBO-Alkyne Alexa 488 even at  $\lambda_{ex}$  568 nm. The fluorescein-containing alkyne C also emitted a signal at  $\lambda_{ex}$  488 nm. The electrophoresis gels indicated that compound (B), (C) and (D) had bound to the azide-loaded protein, as indicated by the red traces which are visible under 568 nm irradiation. The control compounds, lacking the strained alkynes, do not give red traces in the gel. The red traces in the gel are, however, much weaker than those of the commercial click reagents in which DIBO is the strained alkynes.

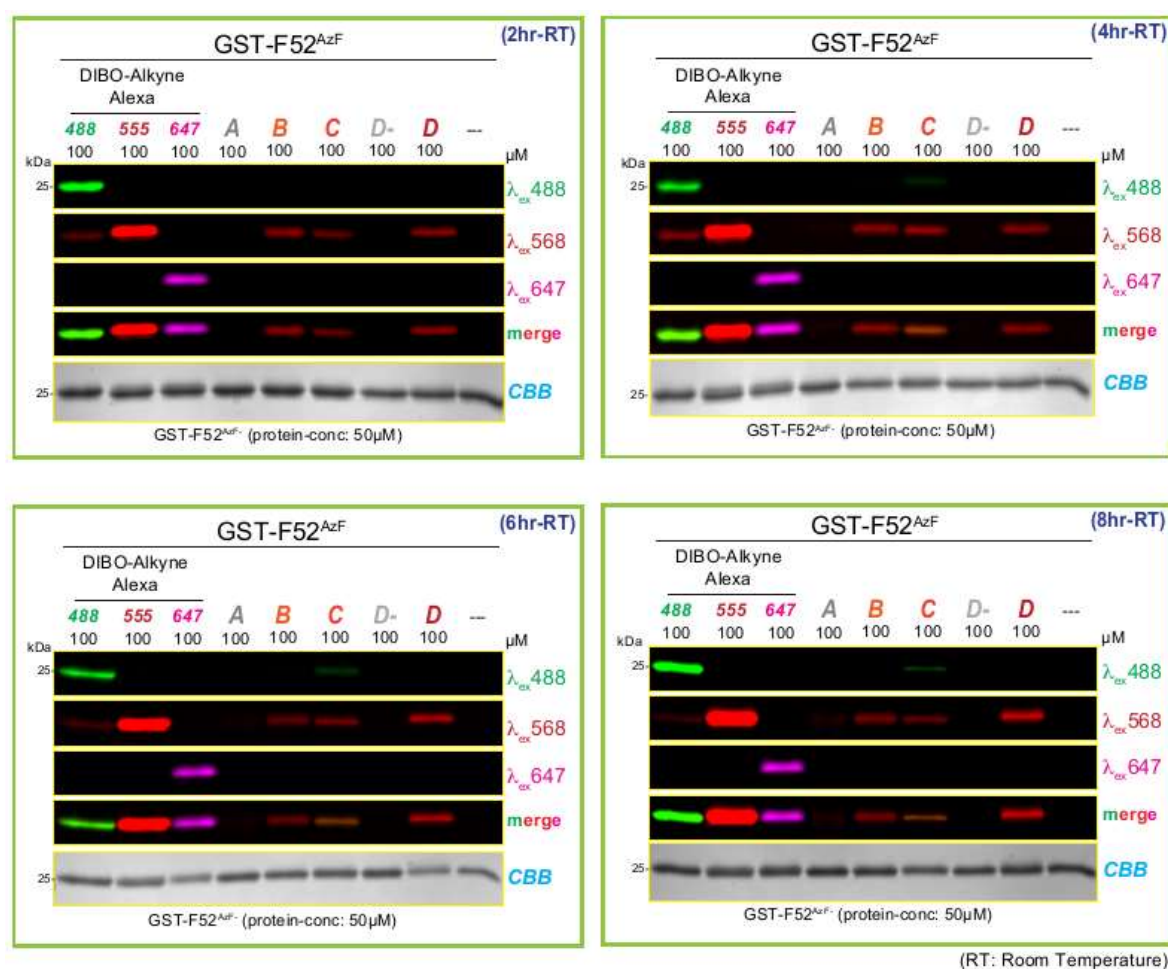

**Above.** Gel electrophoresis of the click reactions of three commercial strained alkynes with azide-labelled GST at various temperatures and visualised at varying wavelengths (note: Alexa 488;  $\lambda_{ex}$  488,  $\lambda_{em}$  494, Alexa 555;  $\lambda_{ex}$  555,  $\lambda_{em}$  565, Alexa 647;  $\lambda_{ex}$  647,  $\lambda_{em}$  667 nm)..

#### Analysis by mass spectrometry:

Although the gel results were promising, the subsequent mass spectrometry analysis of a selection of the products only revealed new molecular ions corresponding to the clicked product for compound (C) and not for either (B) or (D) (see below). This indicates that either the extent of click reaction is very low and below the level which can be determined by mass spectrometry or that the alkyne is attached to the protein in the gels through non-covalent interactions. One of the DIBO-Alexafluor standards was confirmed to attach strongly in the mass spectrometry analysis. In several cases, glutathionylation of the protein was observed, which is a known process for this protein

(J. Melchers, N. Dirdjaja, T. Ruppert and R. L. Krauth-Siegel, *J. Biol. Chem.* 2006, **282**, 8678–8694).

**Mass spectrometry procedure:**

Instrument: Bruker MaXis II coupled with Dionex 3000RS UHPLC

Column: ACE C4, 300A, 100x2.1mm,

Mobile phases: A: Water with 0.1% Formic acid

B: Acetonitrile with 0.1% Formic acid

Gradient: 0-5mins, 95% A/5% B

5-20mins: 95 %A /5% B to 100% B

20-25mins, 100% B

25-27mins, 100% B to 95% A/5%B

Flow rate: 0.2ml/min

Injection volume: 10uL

**1) Azide-functionalised GST protein standard. No glutathionylation observed.**

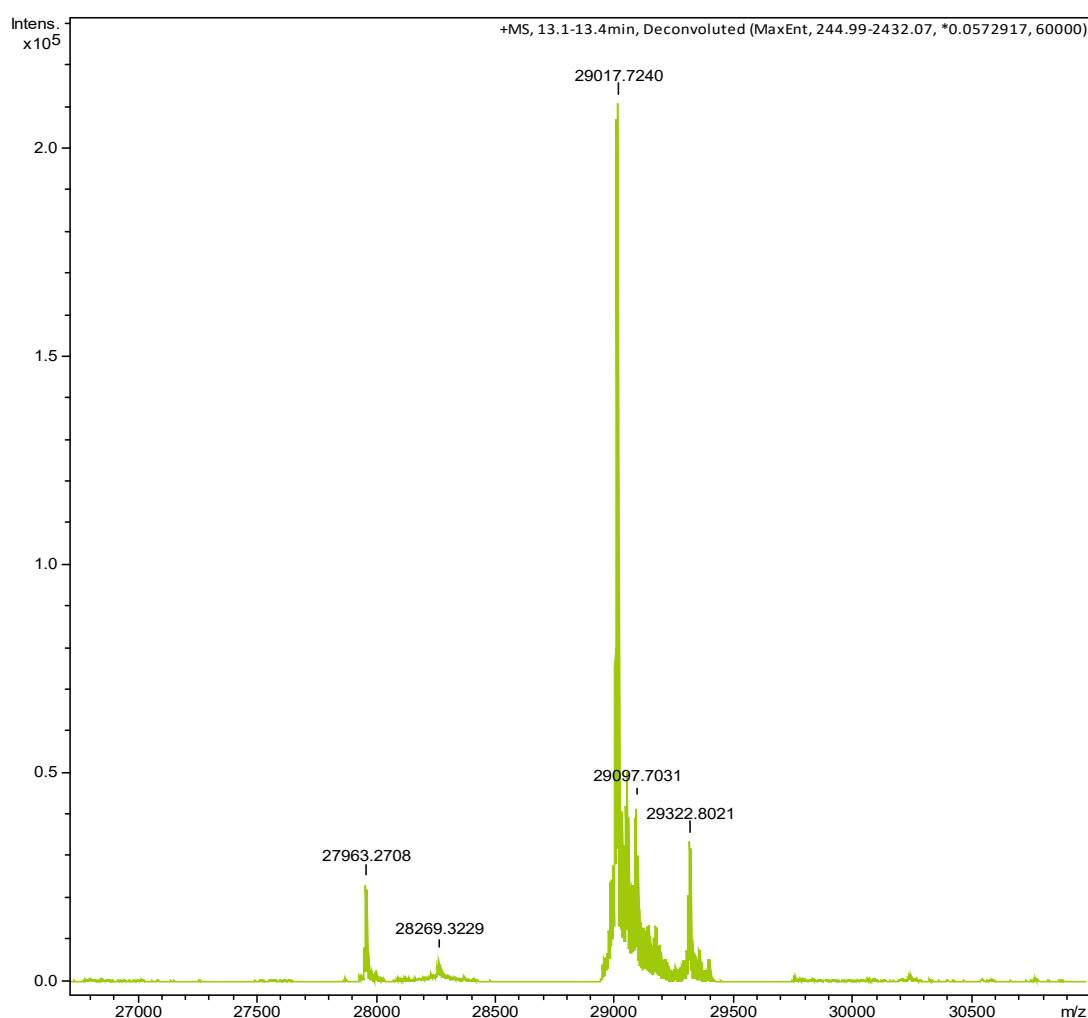

The signal at 29,017 is from the azide-containing protein.

2) GST azide+ addition of a DIBO-Alexa 488 commercial dye (MW = 834 (of the positively charged fluorescent component; <https://www.fishersci.co.uk/shop/products/click-it-alexa-fluor-488-dibo-alkyne-copper-free-click-chemistry-detection-azide/10716241> total MW = 1039.23 Molecular formula = C<sub>53</sub>H<sub>62</sub>N<sub>6</sub>O<sub>12</sub>S<sub>2</sub> Molecular Formula. This compound adds fully in the click reaction as analysed by mass spectrometry:

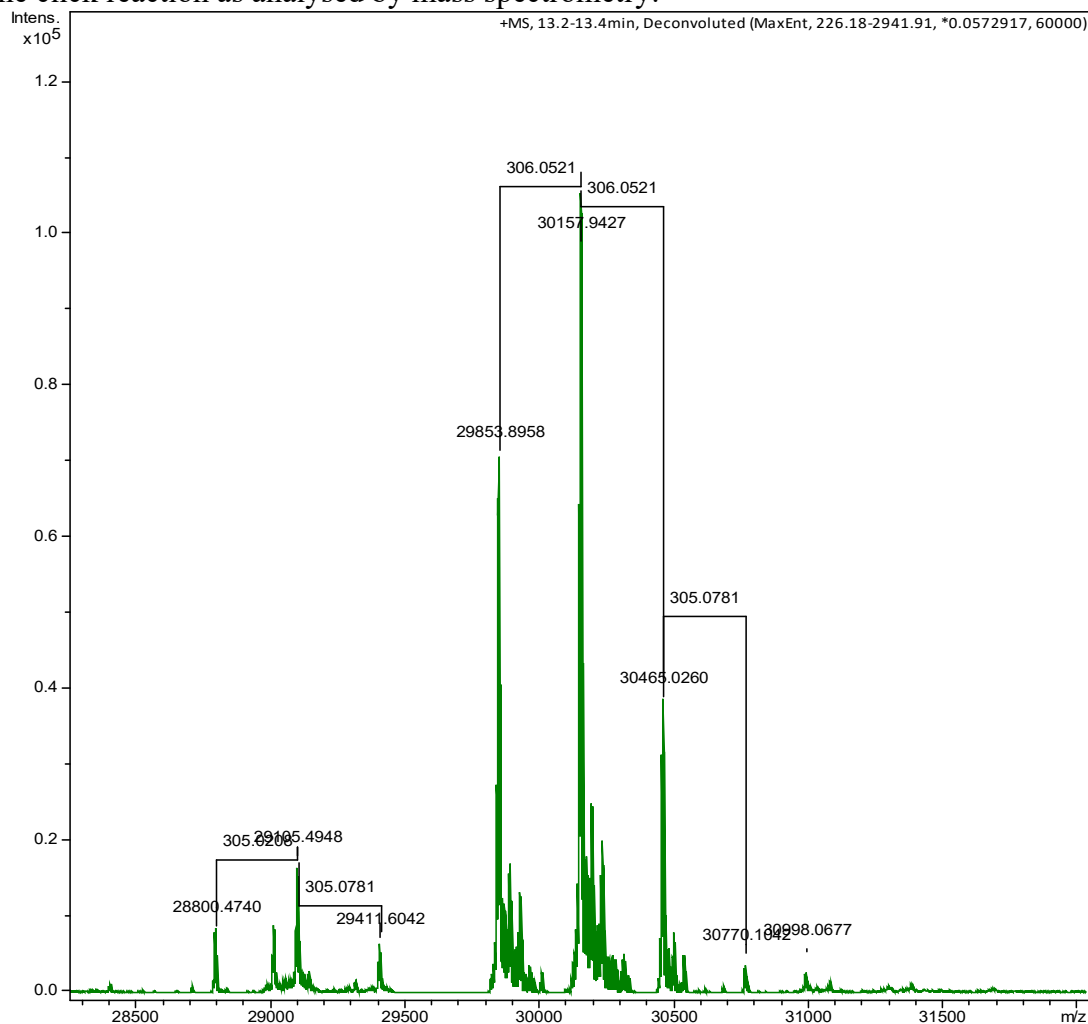

Peak at M/Z 29,853 corresponds to unclicked at 29,017 + 834 = 29,851.

Peak at M/Z 30,157 corresponds to unclicked at 29,322 + 834 = 30,166.

Peak at m/z 30,465 corresponds to unclicked at 29,627 + 834 = 30,461.

**3) BoDIPY functionalised alkyne B** (previously reported in A. Mistry, R. C. Knighton, S. Forshaw, Z. Dualeh, J. S. Parker and M. Wills, *Org. Biomol. Chem.*, 2018, **16**, 8965-8975).

The main visible peaks are of glutathionylation are observed, which adds steps of 306 to the mass, and is a known process for this protein. No click product was detected.

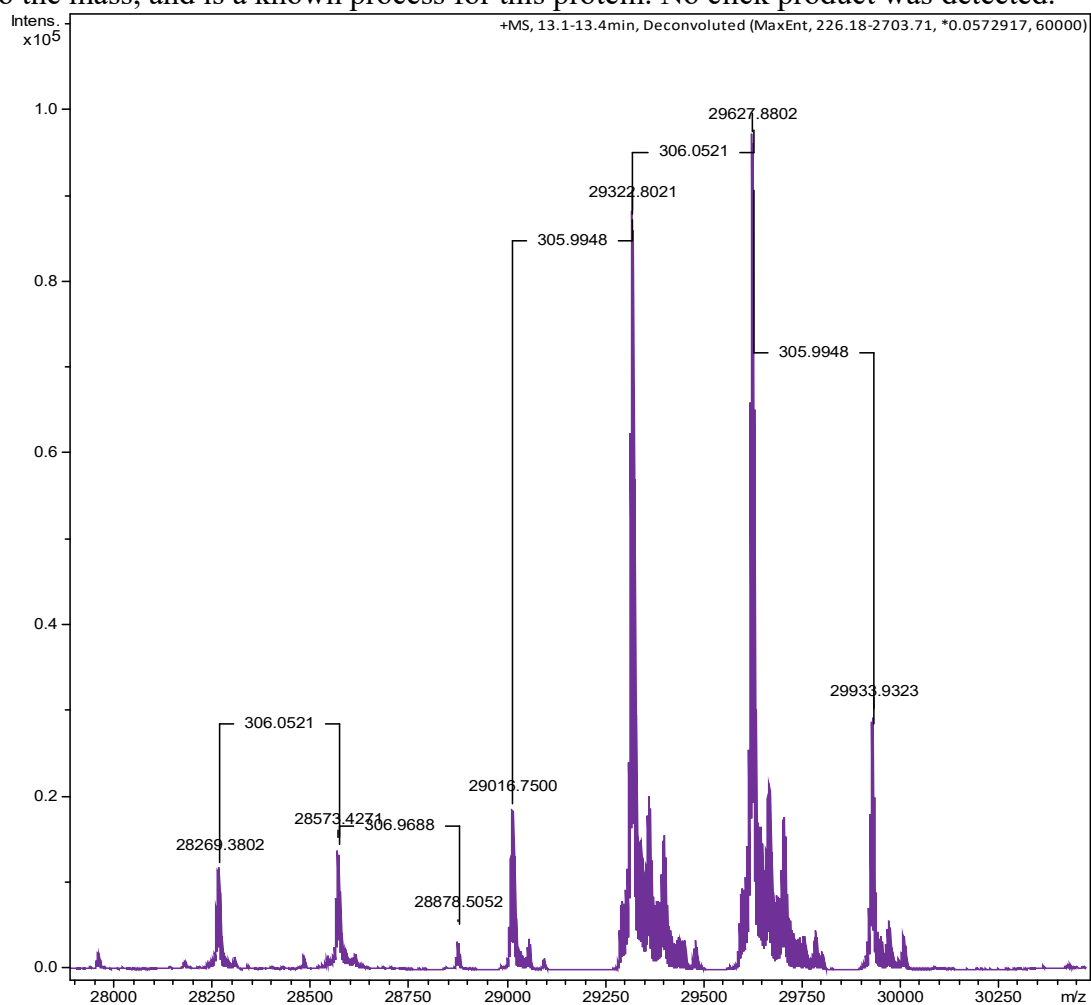

#### 4) GST-azide protein with fluorescein-labelled alkyne C (compound 24).

In this structure, products of glutathionylation are observed, as are products from addition of the alkyne, although at low intensity:

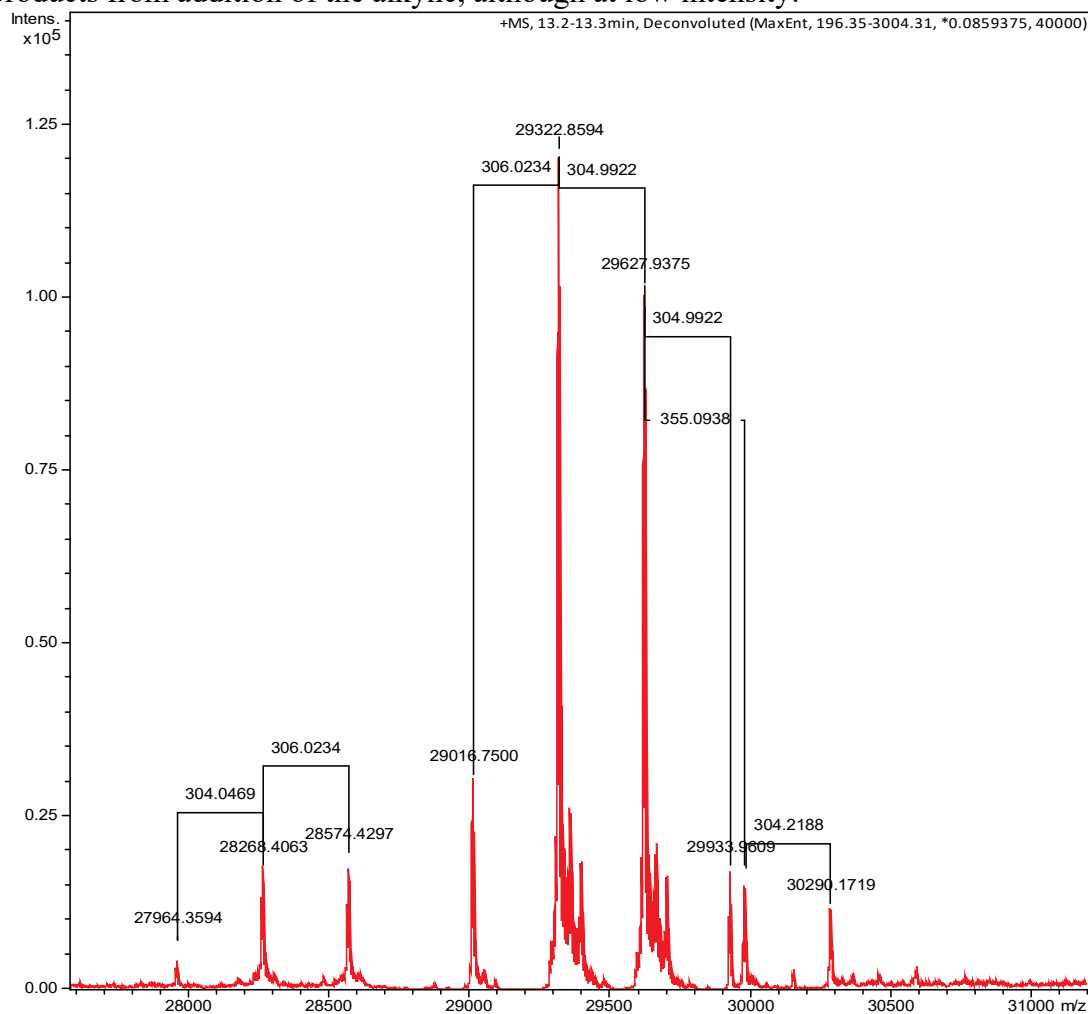

The major peaks correspond to additions of 306 to the protein due to glutathionylation. However, an addition of 662 can be seen to the 29,332 peak at 29,994, and to the 29,628 peak at 30,290, corresponding to addition of compound C/24.

### 5) GST-azide+ Rhodamine alkyne D (25).

No addition of alkyne is observed. Only peaks from glutathionylation are observed.

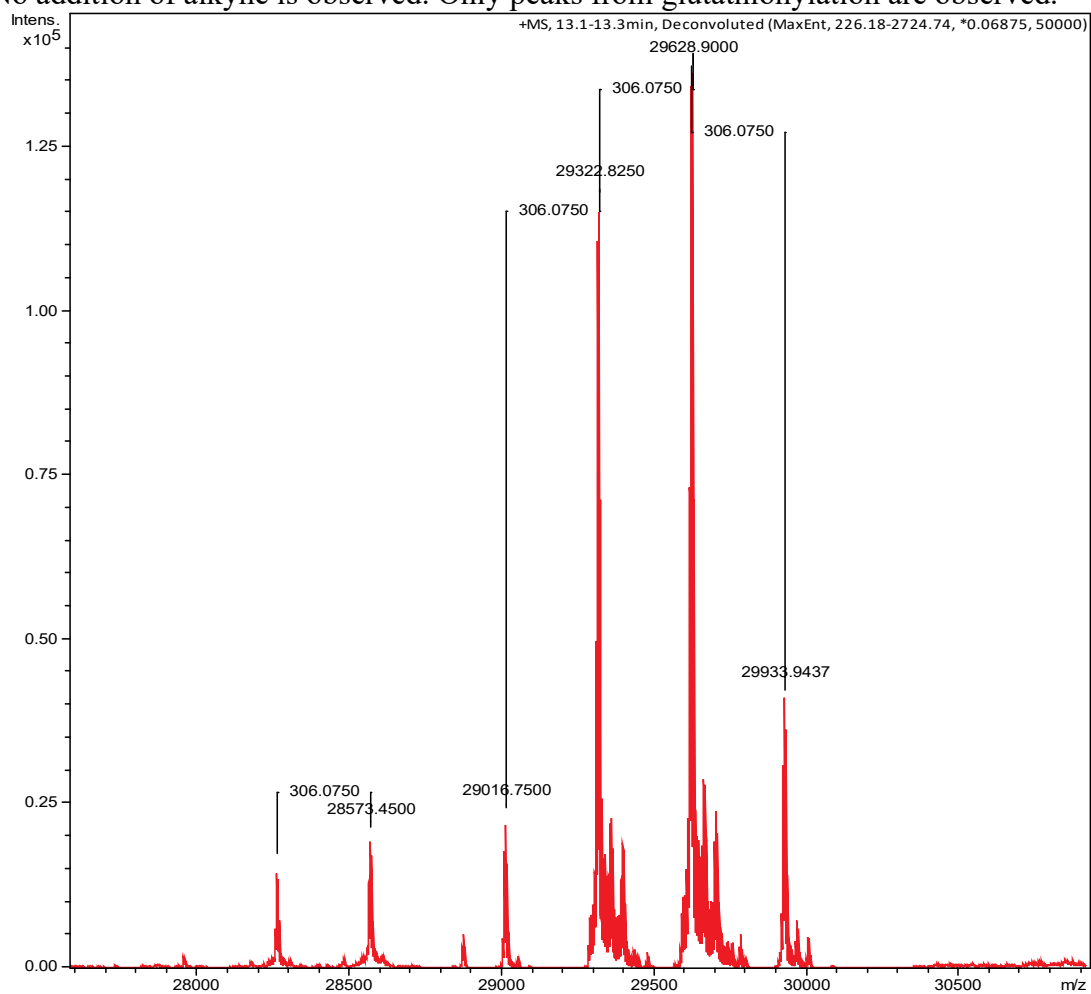

## Comparison of mass spectrometric analyses of all samples in first set of tests:

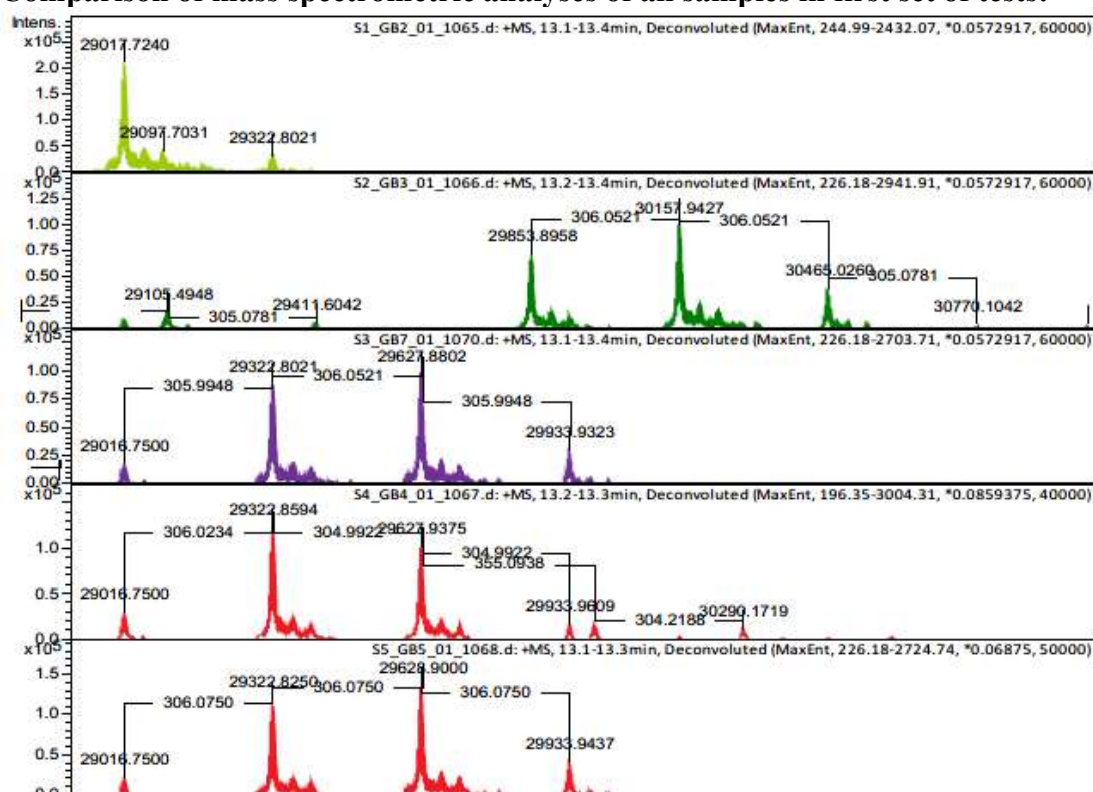

**Above:** The reference sample of GST-azide alone (row 1) is not glutathionylated. In the clicked samples (rows 2-5) the protein is significantly glutathionylated (steps of +306 from 29.017). In row 2, the successful addition of a DIBO-AlexaFluor 488 dye (MW 834) is clear from the mass increases observed. There is no evidence of a successful click reaction in rows 3 (Biodipy **B**) or 5 (Rhodamine functionalised **D/25**). The peaks in row 4 at 30,290 and 29,994 correspond to an addition of ca 662, (corresponding to the MW of the fluorescein compound **C/24**) to the 29,628 and 29,332 peaks respectively, indicating a low but distinctive level of click reaction.

### Second series of click reactions.

#### Method – Click Reactions for MS Detection

##### **Genetic Code Expanded GST Protein Purification**

An amber stop codon was introduced via site-directed mutagenesis into the F52 position of Glutathione S-Transferase (GST) tagged with a thrombin site-linked 6xHis-tag in a pET vector (pET His6 GST TEV LIC) (Addgene, #29707). For synthetase/tRNA expression, pDule-pCNF plasmid (Addgene, #85494) was used. These constructs were chemically transformed into BL21(DE3) *E. coli*. 5ml cultures of transformed cells were grown overnight, and then diluted to 0.1 OD<sub>600</sub> before growth to 0.3 OD<sub>600</sub>. 100mM H-4-Azido-Phe-OH/azidophenylalanine (AzF) (Bachem, 4096192) in 0.2M HCl was added to each culture to a final concentration of 1mM AzF. All procedures were done in the dark where possible from this point. Cultures were grown to 0.5 OD<sub>600</sub> and 0.5mM IPTG was added. After a further 3-4 hours incubation, cultures were centrifuged at 4,000 rpm for 10 minutes. Pellets were stored at -80°C until protein purification.

For purification, 5X Protein Prep Buffer (500mM Tris-HCl, 2.5M NaCl) and 1M imidazole were prepared, adjusted to pH 8.5 and autoclaved. Pellets were each dissolved in 30ml Lysis Buffer (1x Protein Prep Buffer, 5mM imidazole, 1 cComplete™

EDTA-free protease inhibitor cocktail tablet (Roche, 05056489001)) and lysed via sonication. They were then centrifuged at 15,000 rpm for 30 minutes. The supernatant was incubated for 1h at 4°C with 200µl HisPur™ Ni-NTA Resin (Thermo Scientific, 88222) pre-equilibrated in 1x Protein Prep Buffer, before centrifugation at 700 g for 2 minutes. The supernatants were decanted and the beads washed six times in Wash Buffer (1X Protein Prep Buffer, 30mM imidazole), spinning at 700 g for 1 minute each time. The beads were then eluted five times in Elution Buffer (1X Protein Prep Buffer, 300mM imidazole), spinning at 700 g for 2 minutes each time.

For dialysis, eluted protein was dialysed in Spectra/Por®6 Dialysis Membrane 15kDa Pre-Wetted RC Tubing (SpectrumLabs, 132562), stirring in 1L Storage Buffer (20mM Tris/HCl (pH7.5), 100mM NaCl, 0.5mM EDTA, 20% glycerol, 1mM DTT) at 4°C overnight. The resulting samples were aliquoted, snap frozen and stored at -80°C. Protein concentration was determined via Bradford assays and Coomassie blue-stained 12% SDS-PAGE gels.

### **Proteomics Mass Spectrometry**

To check successful AzF incorporation into GST, the protein was run on a 12% SDS-PAGE gel, and an in-gel trypsin digestion carried out. Briefly, the gel bands were cut out after Coomassie blue staining, and de-stained in 50% ethanol and 50mM ammonium bicarbonate (ABC) three times for 20 minutes each. After dehydration in ethanol for 5 minutes, the gels were reduced in 10mM TCEP and 40mM CAA for 5 minutes at 70°C. After three further 10-minute washes in 50% ethanol and 50mM ABC, the gels were dehydrated again in ethanol for 5 minutes. 2.5 ng/µl trypsin was added in sufficient quantity to hydrate the gel, and then topped up with 50mM ABC to submerge the gels, which were left at 37°C overnight, after which liquid was collected. To extract any remaining peptides, the gels were submerged in 25% acetonitrile and 5% formic acid and sonicated for 10 minutes in a water bath three times, keeping the liquid each time. All liquid extractions were combined and concentrated via speed vacuum. Finally, these peptides were resuspended in 2% acetonitrile and 0.1% trifluoroacetic acid to a final volume of 50µl.

For mass spectrometry of peptides, NanoLC-ESI-MS/MS analysis was used. Reversed phase chromatography was used to separate tryptic peptides prior to mass spectrometric analysis. Two C18 columns were utilised, an Acclaim PepMap µ-precolumn cartridge 300 µm i.d. x 5 mm 5 µm 100 Å (Thermo Fisher Scientific) and a 75 µm x 40 cm 1.9 µm (Bruker nanoElute Forty Analytical column). The columns were installed on a NanoElute UHPLC system (Bruker Daltonics, Germany). Mobile phase buffer A was composed of 0.1% formic acid in water and mobile phase B 0.1 % formic acid in acetonitrile. Samples were loaded on onto the µ-precolumn equilibrated in 2% aqueous acetonitrile containing 0.1% formic acid and peptides were eluted onto the analytical column at 350 nL min<sup>-1</sup> by increasing the mobile phase B concentration from 3% B to 15% over 31 min, then to 35% B over 10 min, and to 85% B over 3 min, followed by a 10 min re-equilibration at 0% B. NanoElute was coupled online to a hybrid timsTOF Pro (Bruker Daltonics, Germany) via a CaptiveSpray nano-electrospray ion source [1]. The timsTOF Pro was operated in Data-Dependent Parallel Accumulation-Serial Fragmentation (PASEF) mode. Peptides were separated by ion mobility depending on their collisional cross sections and charge states. The method settings were as follows: mass range 100 to 1700 m/z, ion mobility range 1/K0 Start 0.6 Vs/cm<sup>2</sup> End 1.6 Vs/cm<sup>2</sup>, Ramp rate 9.42 Hz and Duty cycle 100%. For data analysis, the raw data were searched



using FragPipe version 18.0 (<https://fragpipe.nesvilab.org/>) against *Homo sapiens* database ([www.uniprot.org/proteomes](http://www.uniprot.org/proteomes)) and common contaminant database. For the database search, peptides were generated from a tryptic digestion with up to two missed cleavages, carbamidomethylation of cysteines as fixed modifications. Oxidation of methionine and acetylation of the protein N-terminus were added as variable modifications. Scaffold software version 5 (<https://www.proteomesoftware.com/products/scaffold-5>), Perseus (<https://maxquant.net/perseus/>) and Mascot (<http://www.matrixscience.com>) were used to analyse the results. The authors Acknowledge Dr Cleidi Zampronio and the Warwick Proteomics Research Technology Platform for the mass spectrometry analysis of the protein sequence.

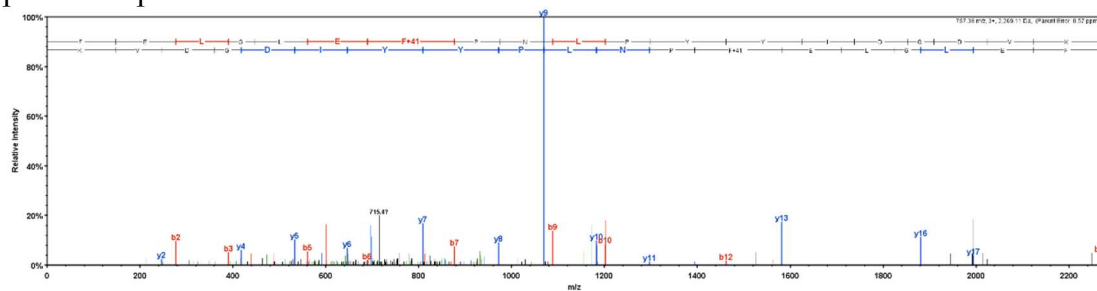

[1] Meier F., Brunner A.D., Koch S., Koch H., Lubeck M., Krause M., Goedecke N., Decker J., Kosinski T., Park M.A., Bache N., Hoerning O., Cox J., Räther O., Mann M. Online parallel accumulation–serial fragmentation (PASEF) with a novel trapped ion mobility mass spectrometer. *Mol. Cell. Proteom.* 2018;17:2534–2545. doi: 10.1074/mcp.TIR118.000900.

### ***In vitro* Click Reactions and Mass Spectrometry**

Each strained alkyne was added to a final concentration of 5mM in 20µl 150µM GST-AzF protein and left at room temperature in the dark overnight. 1M pH 7.5 Tris/HCl was added to a final volume of 500µl. The samples were spun for 15 minutes at 14,000 g in a 0.5ml 10kDa Amicon® filter (Millipore, UFC501008). The filters were washed six times in 500µl 35mM ammonium acetate (pH 7.4), spinning at 14,000 g for 15 minutes each time. Samples were collected by centrifuging the inverted filter at 1,000 g for 2 minutes. Each sample was topped up to 500µl in 35mM ammonium acetate (pH7.4).

Procedure for mass spectrometry of clicked proteins:

Instrument: Bruker MaXis II coupled with Dionex 3000RS UHPLC  
 Column: C4, 100x2.1mm, 2.7µm  
 Gradient: 5-100% Water/CAN  
 Flow rate: 0.2ml/min

The results of the mass spectrometric analyses of the click reactions are listed below:

# 1) Azide-labelled GST protein before click reactions;

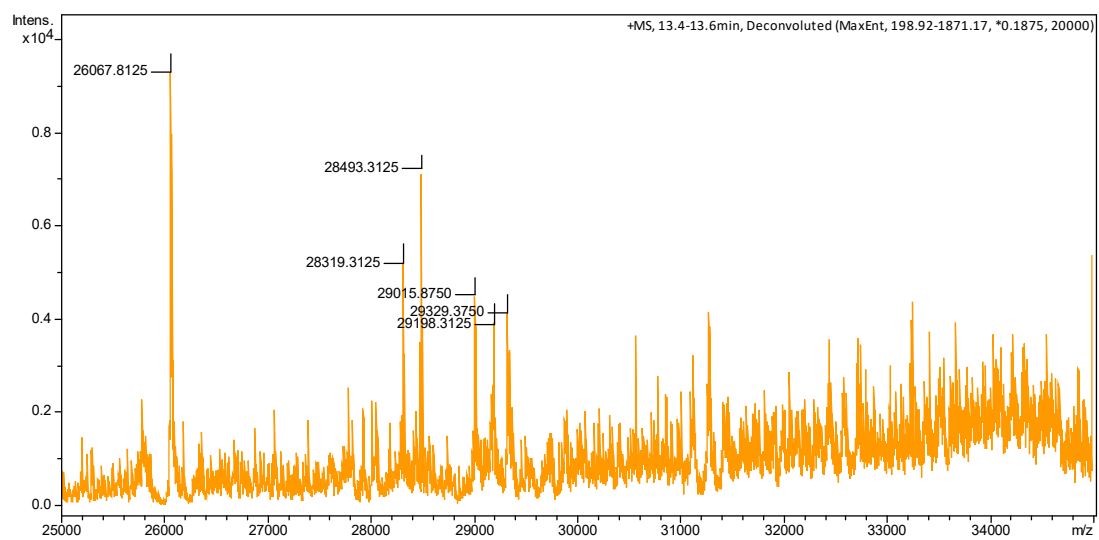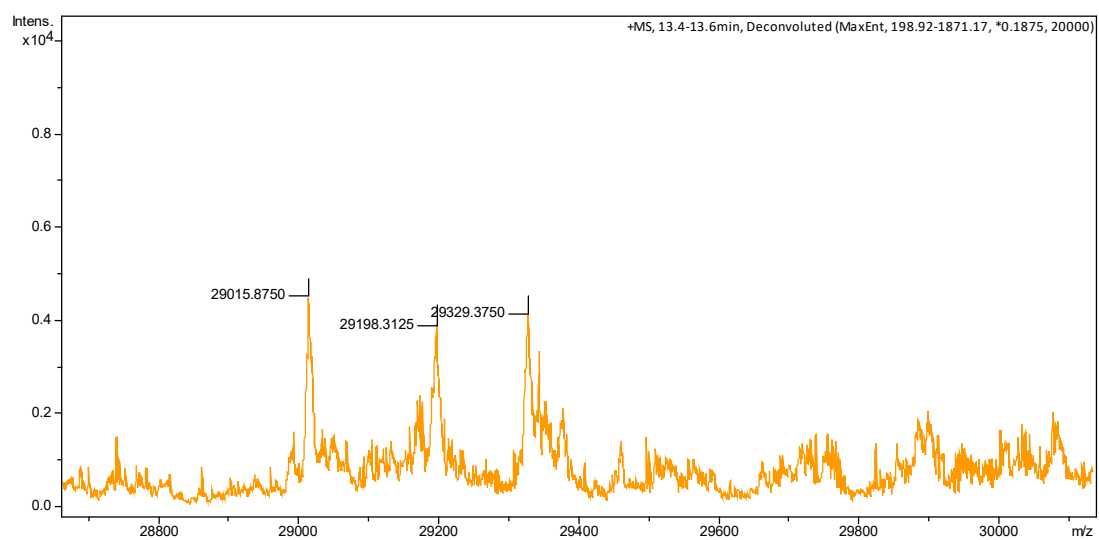

2) **WS9. Mono-Chalcone Diphenyl Strained Alkyne 16** MW = 409 Da  
Fluorescent (Ex = 420nm, Em = 520nm)

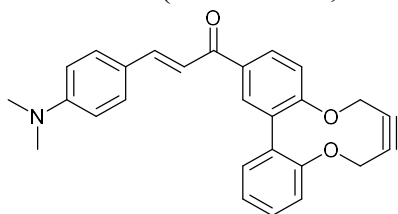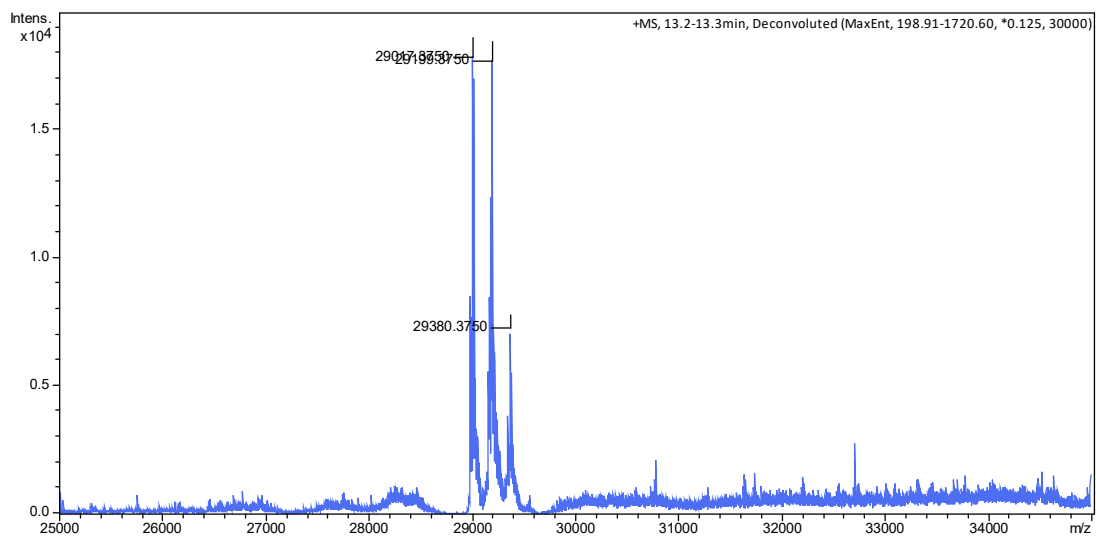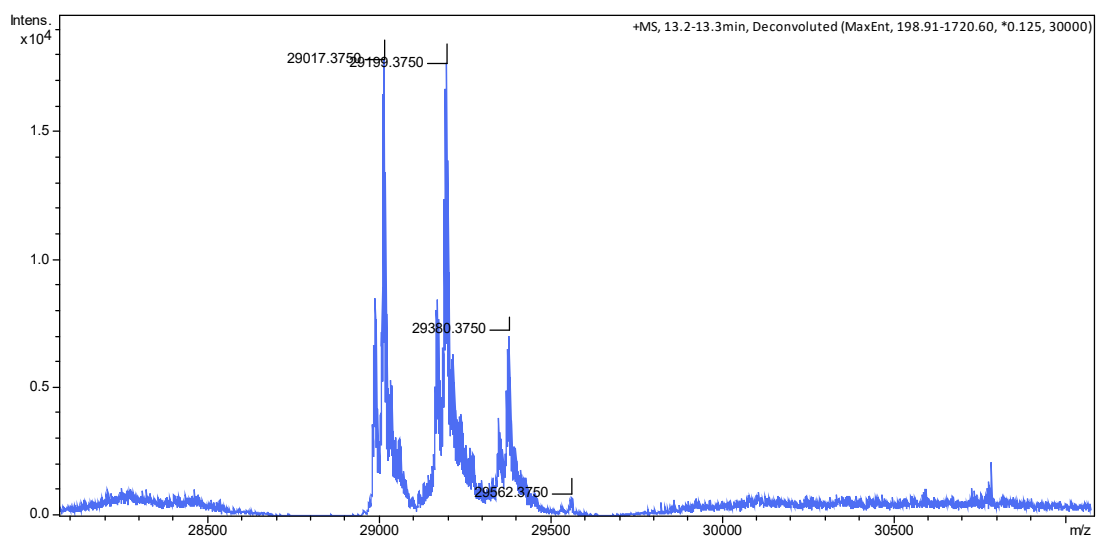

No click reaction observed.

**3) Bis-chalcone 22:** MW = 582 Da  
Fluorescent (Ex = 420nm, Em = 520nm)

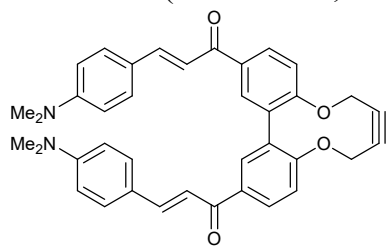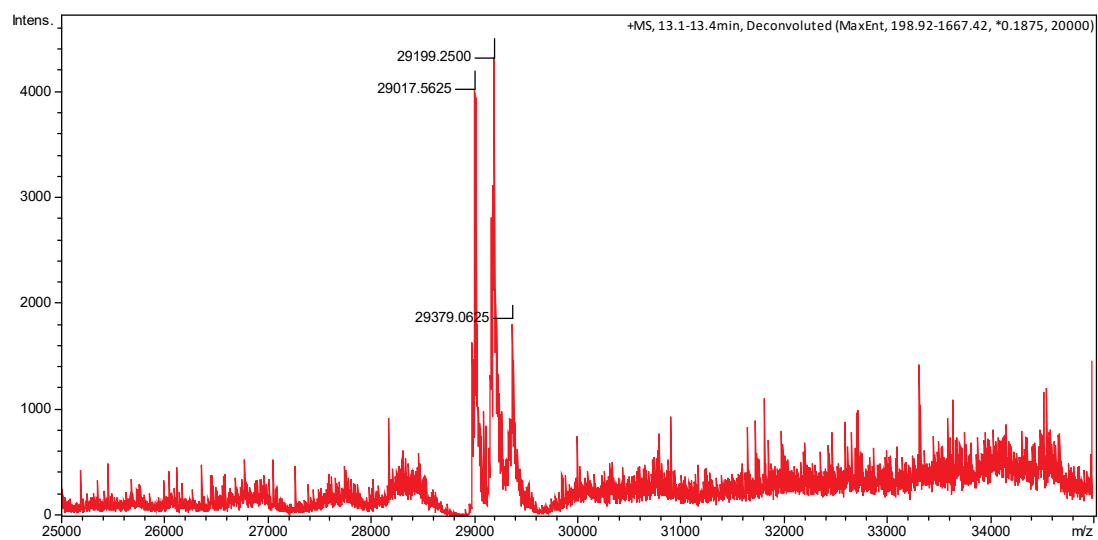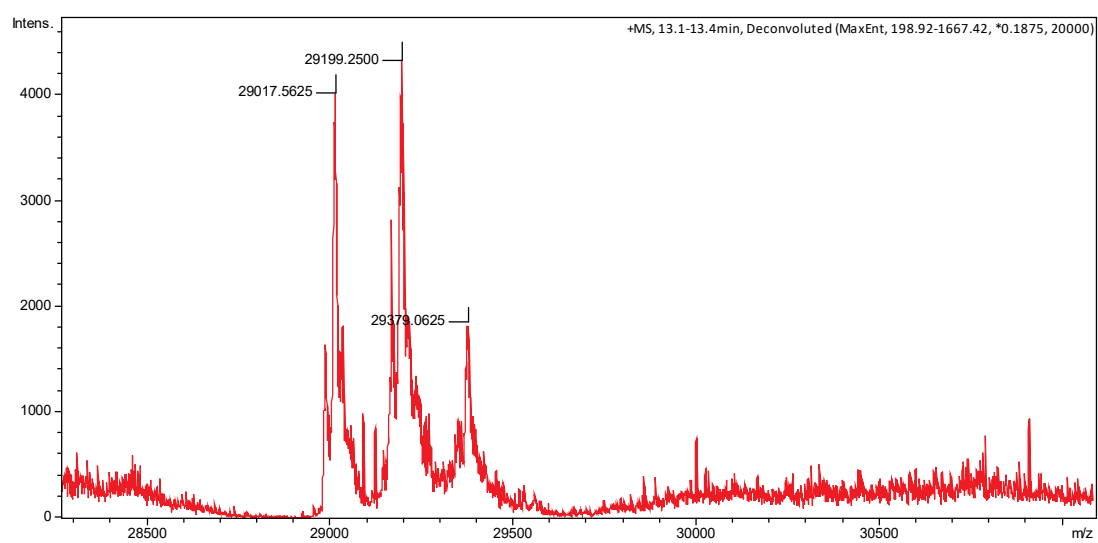

No click reaction observed.

#### 4) 4C-Bridged Diphenyl Strained Alkyne 44.

MW = 322 Da Not fluorescent

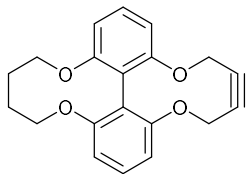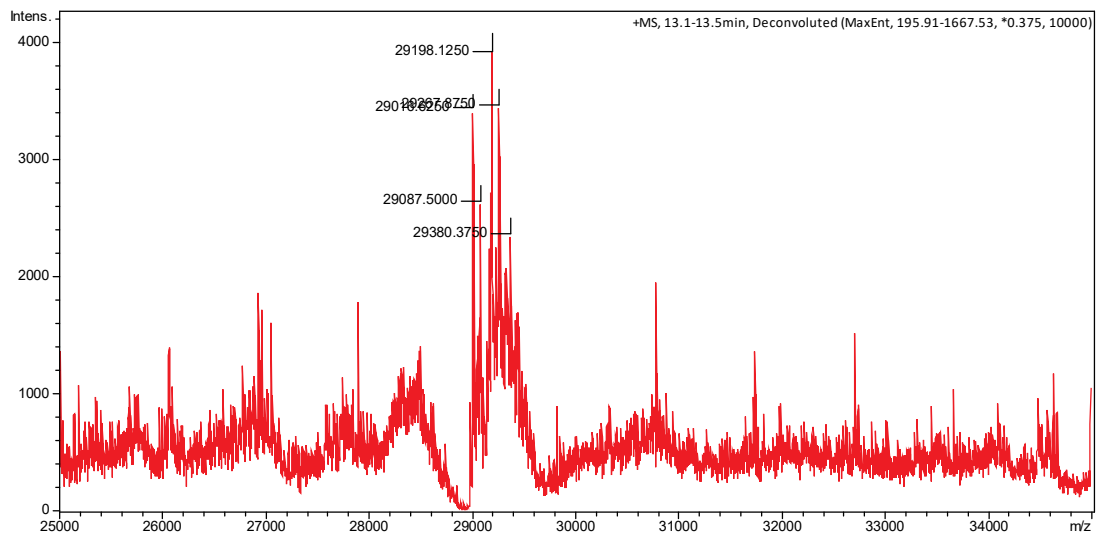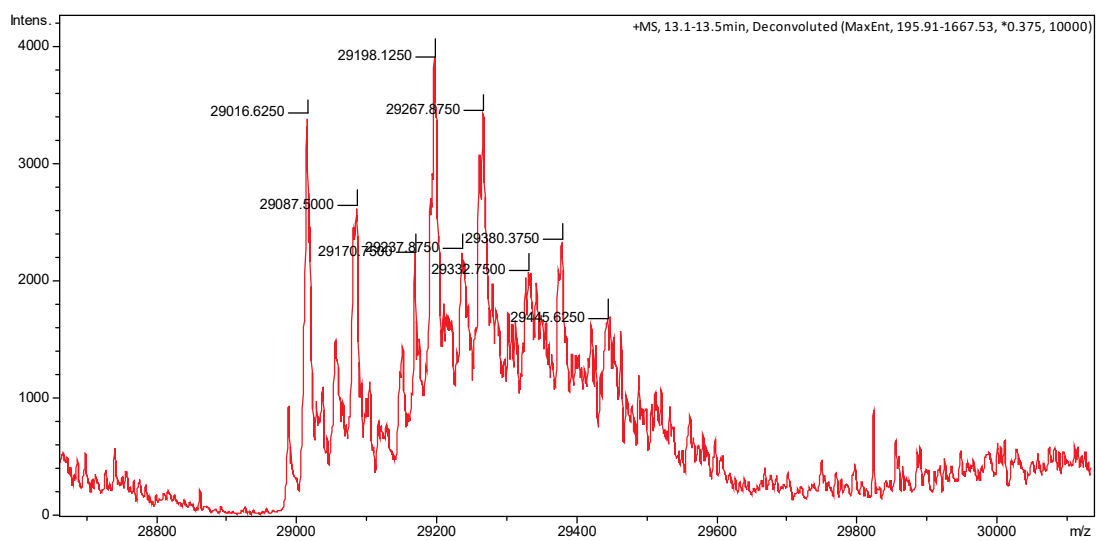

Weak click reaction observed; 29017 to 29332.

### 5) Bis-Dansyl Diphenyl Strained Alkyne 52.

MW = 732 Da Fluorescent.

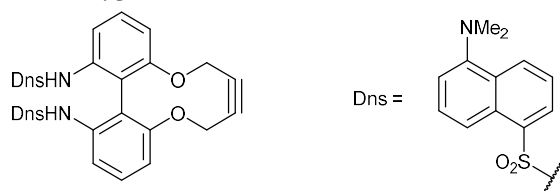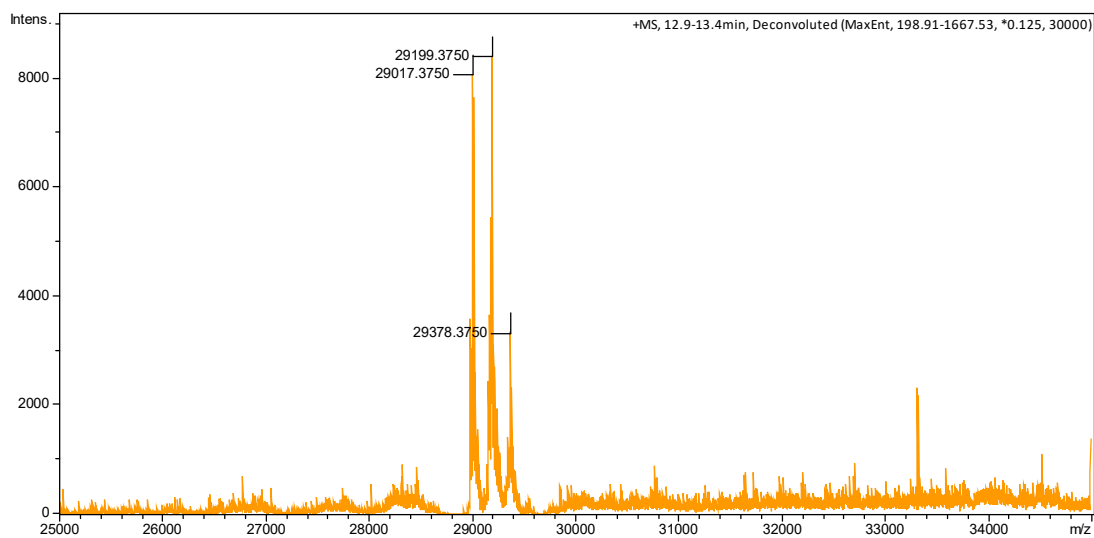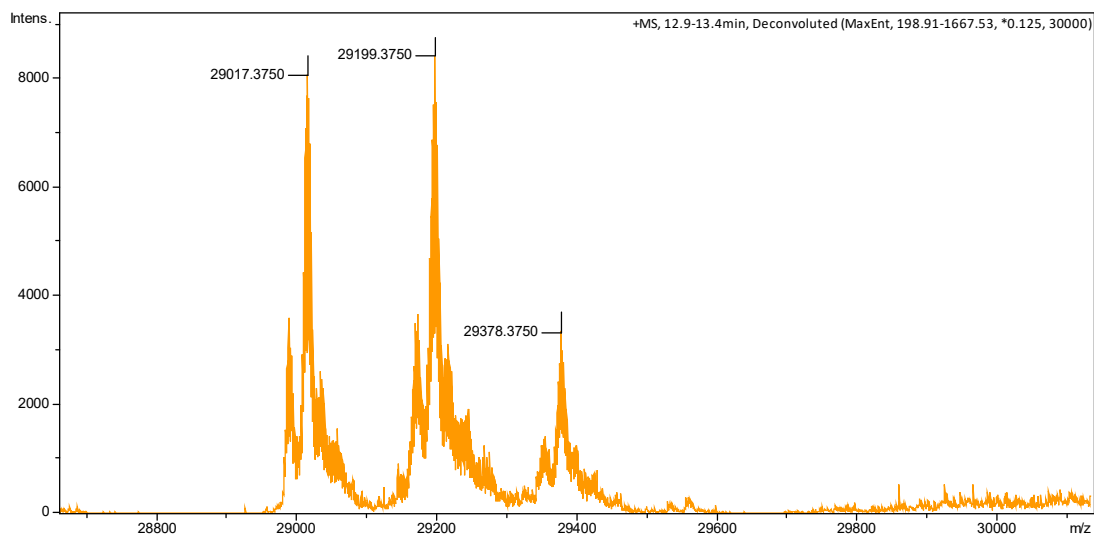

No click product observed.

### 6) 4C-Bridged Bis-Mesyl Diphenyl Strained Alkyne 56.

MW = 476 Da

Not fluorescent

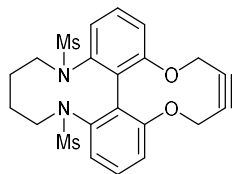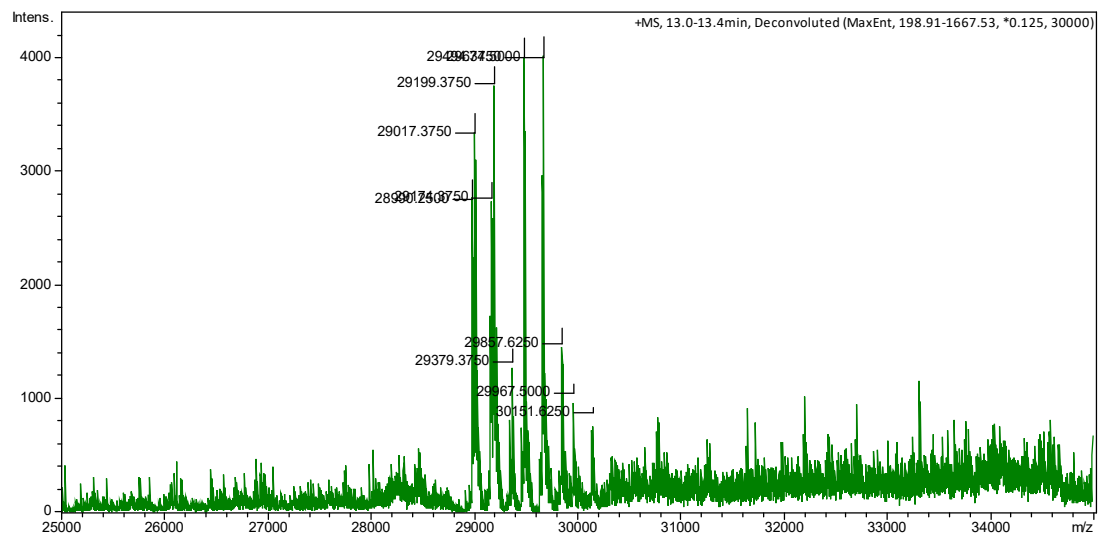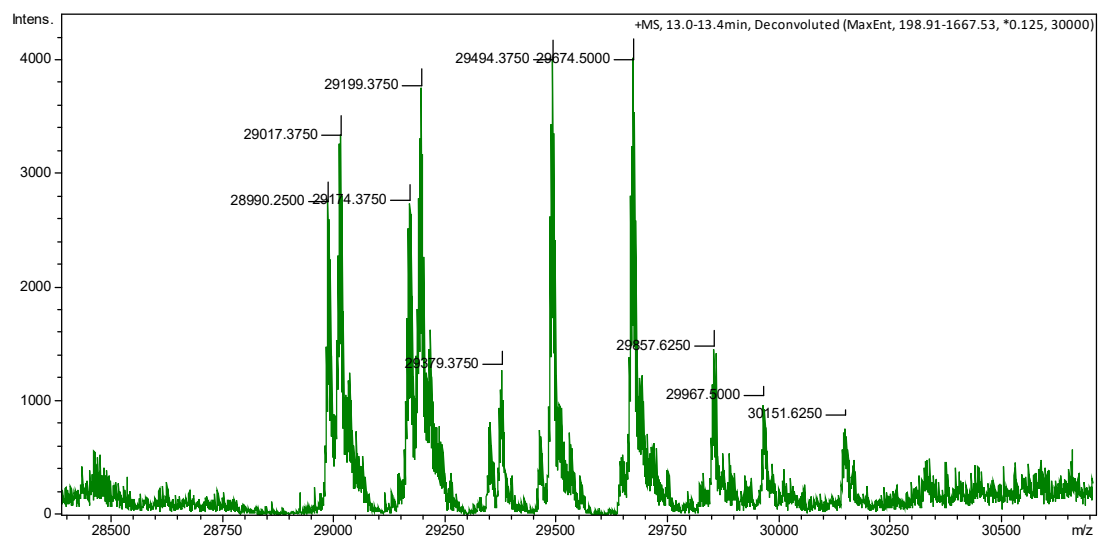

Click addition observed. 29017 to 29494 (+477), 29199 to 29675 (+476).

### 8) 4C-bridged Bis-Tosyl Diphenyl Strained Alkyne **54**.

MW = 628 Da

Not fluorescent

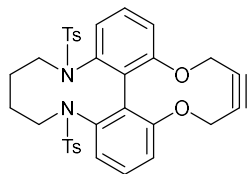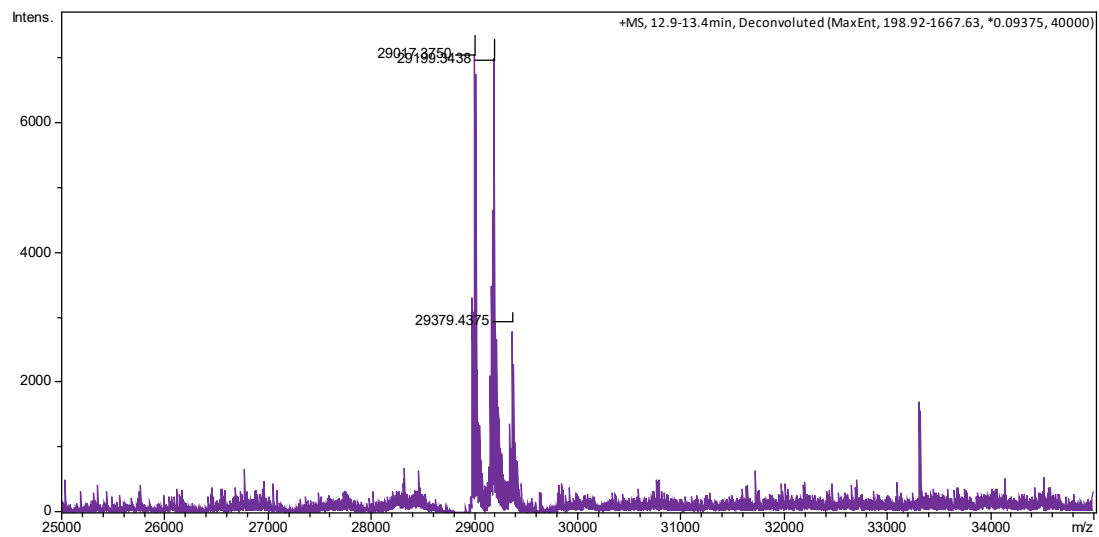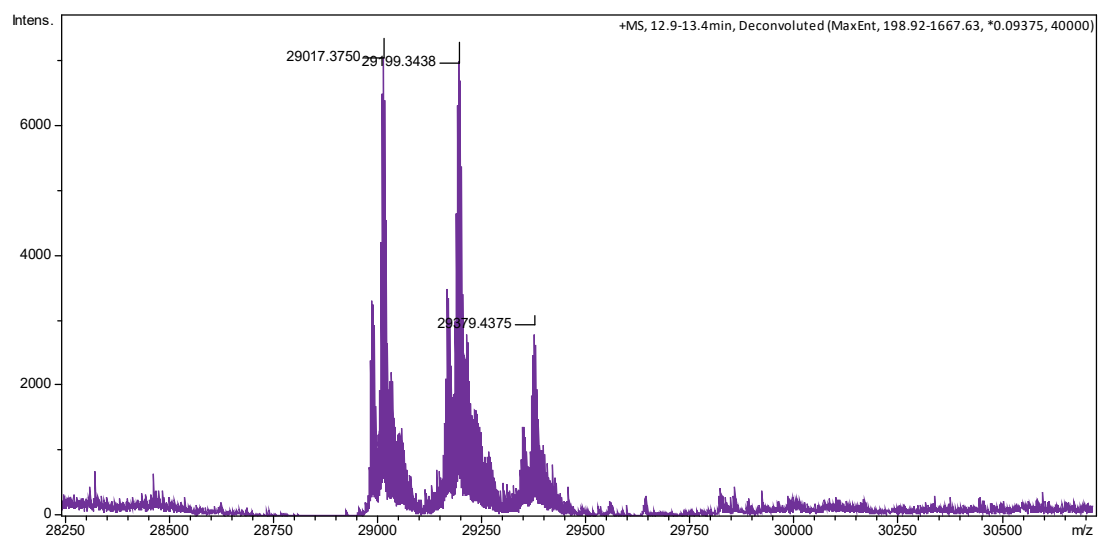

No click reaction observed.



**Summary Table of second set of mass spectrometry studies:**

| sample        | MW of click reagent | Observed unmodified | observed modified | difference vs observed peaks | difference vs standard peaks | Clicked?      |
|---------------|---------------------|---------------------|-------------------|------------------------------|------------------------------|---------------|
| Azidoprotein  |                     | 29015.875           |                   |                              |                              |               |
| GSTAzF        | n/a                 | 29198.3125          |                   |                              |                              |               |
|               |                     | 29329.3759          |                   |                              |                              |               |
| <b>16</b>     |                     | 29017.375           |                   |                              |                              | no click      |
| Mono Chalcone | 409                 | 29199.375           |                   |                              |                              |               |
|               |                     | 29380.375           |                   |                              |                              |               |
| <b>22</b>     |                     | 29017.5625          |                   |                              |                              | no click      |
| DiChal        | 582                 | 29199.25            |                   |                              |                              |               |
|               |                     | 29379.0625          |                   |                              |                              |               |
| <b>44</b>     |                     | 29016               | 29332             |                              | 316.125                      | low level     |
| 4Calkyne      | 322                 | 29198               | 29380             |                              |                              |               |
|               |                     | 29380               | 29445             |                              |                              |               |
| <b>52</b>     |                     | 29017.375           |                   |                              |                              | no click      |
| BisDans       | 732                 | 29199.375           |                   |                              |                              |               |
|               |                     | 29378.375           |                   |                              |                              |               |
| <b>56</b>     |                     | 29017.375           | 29494.38          | 477                          | 478.5                        | excellent fit |
| 4CBisMs       | 476                 | 29199.375           | 29674.5           | 475.125                      | 476.1875                     | excellent fit |
|               |                     | 29379.375           | 29857.63          | 478.25                       | 528.2491                     | n/a           |
| <b>54</b>     |                     | 29017.375           |                   |                              |                              | no click      |
| 4CBisTs       | 628                 | 29199.3438          |                   |                              |                              |               |
|               |                     | 29379.4379          |                   |                              |                              |               |

Excel sheets for each kinetic run:

Reaction of compound **16** (monochalcone) with benzylazide in  $\text{CDCl}_3$ .

Compound **16** (9.7 mg, 24  $\mu\text{mol}$ ) and  $\text{BnN}_3$  (3.2 mg, 24  $\mu\text{mol}$ ) in  $\text{CDCl}_3$  (0.5 mL,  $[\text{alkyne}]_{\text{initial}} = 47 \text{ mM}$ ).

\*  $[\text{alkyne}]$  is in  $\text{M}/1000$  so that gradient of  $1/[\text{S}]$  vs  $\text{time/s}$  is given as  $\text{mM}^{-1}\text{s}^{-1}$  instead of  $\text{M}^{-1}\text{s}^{-1}$

| start date/time  | end of interval  | interval time elapsed/s | total time elapsed/s | time/h | integration of product peak | No. Hs in environment | Integration of SM peak | No. Hs in environment | [Alkyne]/M/1000 * | 1/[Alkyne] | Conv % | Time in s |
|------------------|------------------|-------------------------|----------------------|--------|-----------------------------|-----------------------|------------------------|-----------------------|-------------------|------------|--------|-----------|
| 15/03/2021 08:33 | 15/03/2021 09:07 | 0:0:34:00               | 2040                 | 0.57   | 0                           | 1                     | 4                      | 4                     | 4.74E-05          | 21097      | 0      | 2040      |
| 15/03/2021 09:07 | 15/03/2021 15:05 | 0:5:58:00               | 21480                | 5.97   | 0.25                        | 6                     | 1                      | 2                     | 4.37538E-05       | 22855      | 7.7    | 21480     |
| 15/03/2021 15:05 | 16/03/2021 09:11 | 0:18:06:00              | 86640                | 24.07  | 1.26                        | 6                     | 1                      | 2                     | 3.33803E-05       | 29958      | 29.6   | 86640     |
| 16/03/2021 09:11 | 16/03/2021 15:02 | 0:5:51:00               | 107700               | 29.92  | 1.58                        | 6                     | 1                      | 2                     | 3.1048E-05        | 32208      | 34.5   | 107700    |
| 16/03/2021 15:02 | 17/03/2021 09:05 | 0:18:03:00              | 172680               | 47.97  | 2.74                        | 6                     | 1                      | 2                     | 2.47735E-05       | 40366      | 47.7   | 172680    |
| 17/03/2021 09:05 | 17/03/2021 15:07 | 0:6:02:00               | 194400               | 54.00  | 3.26                        | 6                     | 1                      | 2                     | 2.27157E-05       | 44023      | 52.1   | 194400    |
| 17/03/2021 15:07 | 18/03/2021 09:09 | 0:18:02:00              | 259320               | 72.03  | 4.64                        | 6                     | 1                      | 2                     | 1.86126E-05       | 53727      | 60.7   | 259320    |
| 18/03/2021 09:09 | 18/03/2021 15:04 | 0:5:55:00               | 280620               | 77.95  | 5.04                        | 6                     | 1                      | 2                     | 1.76866E-05       | 56540      | 62.7   | 280620    |
| 18/03/2021 15:04 | 19/03/2021 09:06 | 0:18:02:00              | 345540               | 95.98  | 6.48                        | 6                     | 1                      | 2                     | 0.000015          | 66667      | 68.4   | 345540    |
| 19/03/2021 09:06 | 19/03/2021 15:07 | 0:6:01:00               | 367200               | 102.00 | 7.05                        | 6                     | 1                      | 2                     | 1.41493E-05       | 70675      | 70.1   | 367200    |
| 19/03/2021 15:07 | 20/03/2021 09:06 | 0:17:59:00              | 431940               | 119.98 | 8.8                         | 6                     | 1                      | 2                     | 1.20508E-05       | 82982      | 74.6   | 431940    |
| 20/03/2021 09:06 | 20/03/2021 15:05 | 0:5:59:00               | 453480               | 125.97 | 9.35                        | 6                     | 1                      | 2                     | 1.15142E-05       | 86850      | 75.7   | 453480    |
| 20/03/2021 15:05 | 21/03/2021 09:06 | 0:18:01:00              | 518340               | 143.98 | 11.47                       | 6                     | 1                      | 2                     | 9.82723E-06       | 101758     | 79.3   | 518340    |
| 21/03/2021 09:06 | 21/03/2021 15:05 | 0:5:59:00               | 539880               | 149.97 | 11.96                       | 6                     | 1                      | 2                     | 9.50535E-06       | 105204     | 79.9   | 539880    |
| 21/03/2021 15:05 | 22/03/2021 09:06 | 0:18:01:00              | 604740               | 167.98 | 14.39                       | 6                     | 1                      | 2                     | 8.17711E-06       | 122293     | 82.7   | 604740    |
| 22/03/2021 09:06 | 22/03/2021 15:05 | 0:5:59:00               | 626280               | 173.97 | 14.62                       | 6                     | 1                      | 2                     | 8.07037E-06       | 123910     | 83.0   | 626280    |
| 22/03/2021 15:05 | 23/03/2021 09:07 | 0:18:02:00              | 691200               | 192.00 | 17.89                       | 6                     | 1                      | 2                     | 6.80708E-06       | 146906     | 85.6   | 691200    |
| 23/03/2021 09:07 | 23/03/2021 15:06 | 0:5:59:00               | 712740               | 197.98 | 18.47                       | 6                     | 1                      | 2                     | 6.6232E-06        | 150985     | 86.0   | 712740    |
| 23/03/2021 15:06 | 24/03/2021 09:06 | 0:18:00:00              | 777540               | 215.98 | 21.53                       | 6                     | 1                      | 2                     | 5.79698E-06       | 172504     | 87.8   | 777540    |
| 24/03/2021 09:06 | 24/03/2021 15:05 | 0:5:59:00               | 799080               | 221.97 | 22.65                       | 6                     | 1                      | 2                     | 5.54386E-06       | 180380     | 88.3   | 799080    |

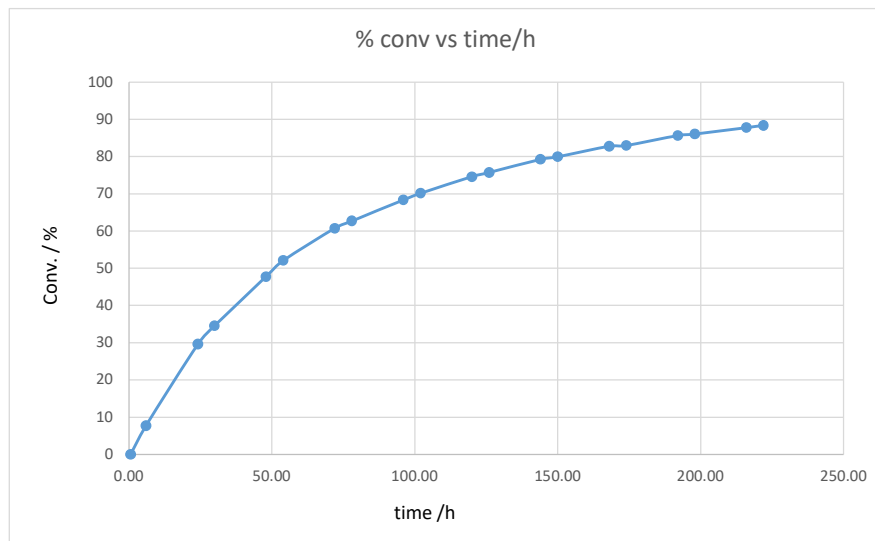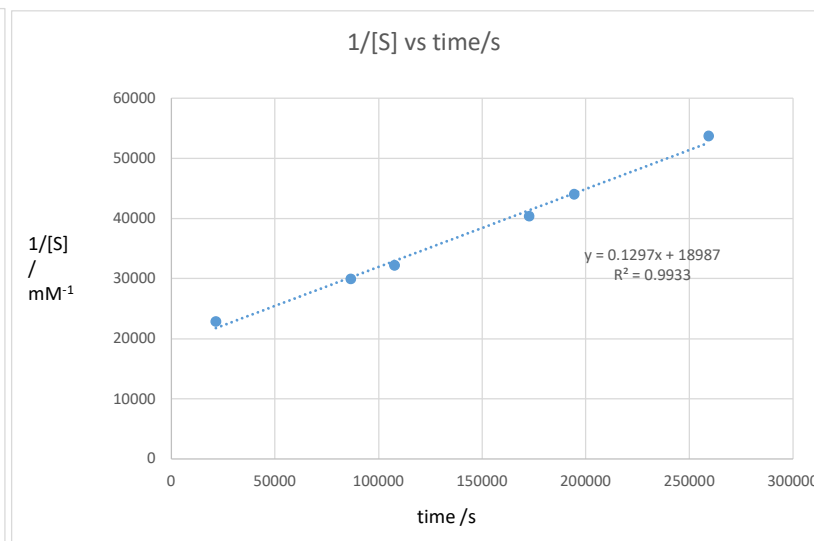

$$k = 0.13 \text{ mM}^{-1} \text{ s}^{-1}$$

Reaction of compound **22** (dichalcone) with benzylazide in  $\text{CDCl}_3$ .

Compound **16** (10 mg, 17  $\mu\text{mol}$ ) and  $\text{BnN}_3$  (2.3 mg, 17  $\mu\text{mol}$ ) in  $\text{CDCl}_3$  (0.5 mL),  $[\text{alkyne}]_{\text{initial}} = 34 \text{ mM}$ .

\*  $[\text{alkyne}]$  is in  $\text{M}/1000$  so that gradient of  $1/[S]$  vs time/s is given as  $\text{mM}^{-1} \text{s}^{-1}$  instead of  $\text{M}^{-1} \text{s}^{-1}$

| start date/time  | end of interval  | time elapsed | interval<br>time/s | ime/h  | integration of<br>product peak | No. Hs in<br>environment | Integration of<br>SM peak | No. Hs in<br>environment | Conv  | [Alkyne]/M/<br>1000 | 1/[Alkyne] | Conv % | time/s |
|------------------|------------------|--------------|--------------------|--------|--------------------------------|--------------------------|---------------------------|--------------------------|-------|---------------------|------------|--------|--------|
| 15/03/2021 08:35 | 15/03/2021 09:13 | 0:0:38:00    | 2280               | 0.63   | 0                              | 6                        | 0.4                       | 2                        | 0.000 | 3.40E-05            | 29412      | 0.0    | 2280   |
| 15/03/2021 09:07 | 15/03/2021 15:11 | 0:6:04:00    | 21840              | 21840  | 0.24                           | 6                        | 1                         | 2                        | 0.074 | 3.1481E-05          | 31765      | 7.4    | 21840  |
| 15/03/2021 15:11 | 16/03/2021 09:18 | 0:18:07:00   | 65220              | 87060  | 1.54                           | 6                        | 1                         | 2                        | 0.339 | 2.2467E-05          | 44510      | 33.9   | 87060  |
| 16/03/2021 09:18 | 16/03/2021 15:09 | 0:5:51:00    | 21060              | 108120 | 1.92                           | 6                        | 1                         | 2                        | 0.390 | 2.0732E-05          | 48235      | 39.0   | 108120 |
| 16/03/2021 15:09 | 17/03/2021 09:11 | 0:18:02:00   | 64920              | 173040 | 48.07                          | 6                        | 1                         | 2                        | 0.549 | 1.5338E-05          | 65196      | 54.9   | 173040 |
| 17/03/2021 09:11 | 17/03/2021 15:13 | 0:6:02:00    | 21720              | 194760 | 54.10                          | 6                        | 1                         | 2                        | 0.583 | 1.4167E-05          | 70588      | 58.3   | 194760 |
| 17/03/2021 15:13 | 18/03/2021 09:15 | 0:18:02:00   | 64920              | 259680 | 72.13                          | 6                        | 1                         | 2                        | 0.693 | 1.0451E-05          | 95686      | 69.3   | 259680 |
| 18/03/2021 09:15 | 18/03/2021 15:10 | 0:5:55:00    | 21300              | 280980 | 78.05                          | 6                        | 1                         | 2                        | 0.702 | 1.0139E-05          | 98627      | 70.2   | 280980 |
| 18/03/2021 15:10 | 19/03/2021 09:13 | 0:18:03:00   | 64980              | 345960 | 96.10                          | 6                        | 1                         | 2                        | 0.773 | 7.7156E-06          | 129608     | 77.3   | 345960 |
| 19/03/2021 09:13 | 19/03/2021 15:13 | 0:6:00:00    | 21600              | 367560 | 102.10                         | 6                        | 1                         | 2                        | 0.788 | 7.2034E-06          | 138824     | 78.8   | 367560 |
| 19/03/2021 15:13 | 20/03/2021 09:12 | 0:17:59:00   | 64740              | 432300 | 120.08                         | 6                        | 1                         | 2                        | 0.832 | 5.6951E-06          | 175588     | 83.2   | 432300 |
| 20/03/2021 09:12 | 20/03/2021 15:11 | 0:5:59:00    | 21540              | 453840 | 126.07                         | 6                        | 1                         | 2                        | 0.847 | 5.2041E-06          | 192157     | 84.7   | 453840 |
| 20/03/2021 15:11 | 21/03/2021 09:12 | 0:18:01:00   | 64860              | 518700 | 144.08                         | 6                        | 1                         | 2                        | 0.881 | 4.0541E-06          | 246667     | 88.1   | 518700 |
| 21/03/2021 09:12 | 21/03/2021 15:12 | 0:6:00:00    | 21600              | 540300 | 150.08                         | 6                        | 1                         | 2                        | 0.888 | 3.7975E-06          | 263333     | 88.8   | 540300 |
| 21/03/2021 15:12 | 22/03/2021 09:12 | 0:18:00:00   | 64800              | 605100 | 168.08                         | 6                        | 1                         | 2                        | 0.913 | 2.9497E-06          | 339020     | 91.3   | 605100 |
| 22/03/2021 09:12 | 22/03/2021 15:11 | 0:5:59:00    | 21540              | 626640 | 174.07                         | 6                        | 1                         | 2                        | 0.916 | 2.842E-06           | 351863     | 91.6   | 626640 |
| 22/03/2021 15:11 | 23/03/2021 09:13 | 0:18:02:00   | 64920              | 691560 | 192.10                         | 6                        | 1                         | 2                        | 0.936 | 2.1693E-06          | 460980     | 93.6   | 691560 |
| 23/03/2021 09:13 | 23/03/2021 15:12 | 0:5:59:00    | 21540              | 713100 | 198.08                         | 6                        | 1                         | 2                        | 0.943 | 1.9274E-06          | 518824     | 94.3   | 713100 |
| 23/03/2021 15:12 | 24/03/2021 09:11 | 0:17:59:00   | 64740              | 777840 | 216.07                         | 6                        | 1                         | 2                        | 0.957 | 1.4596E-06          | 685098     | 95.7   | 777840 |
| 24/03/2021 09:11 | 24/03/2021 15:12 | 0:6:01:00    | 21660              | 799500 | 222.08                         | 6                        | 1                         | 2                        | 0.961 | 1.3374E-06          | 747745     | 96.1   | 799500 |

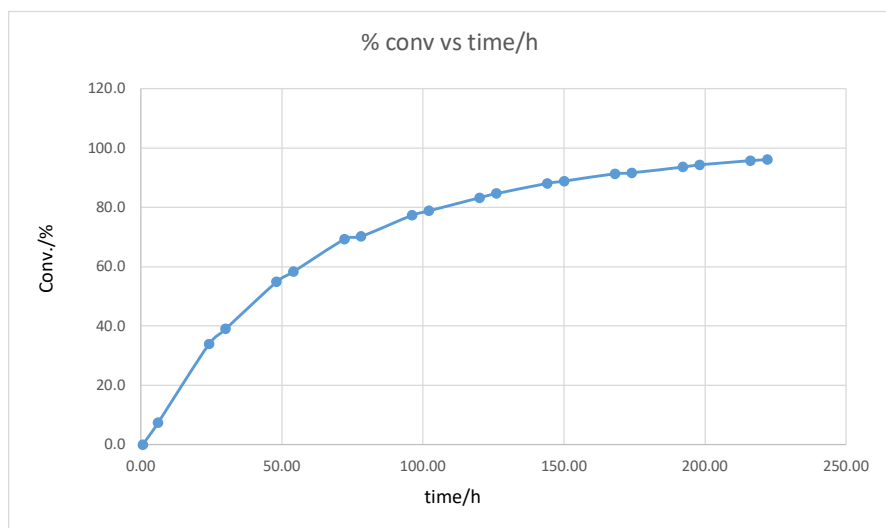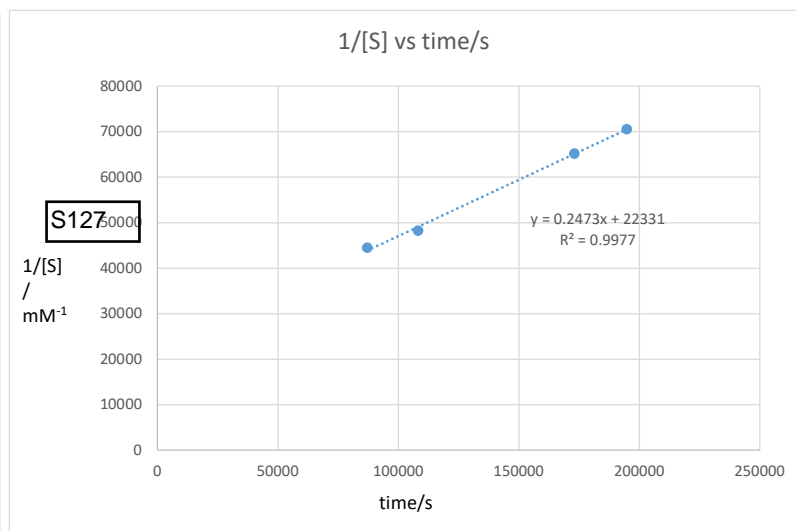

Reaction of compound **29** (NTs-O) with benzylazide in CDCl<sub>3</sub>.

Compound **39** (20 mg, 51 μmol) and BnN<sub>3</sub> (6.6 mg, 51 μmol) in CDCl<sub>3</sub> (0.5 mL), [alkyne](initial) = 97 mM.

\* [alkyne] is in M/1000 so that gradient of 1/[S] vs time/s is given as mM<sup>-1</sup> s<sup>-1</sup> instead of M<sup>-1</sup> s<sup>-1</sup>

| start date/time  | end of interval  | time elapsed | Interval<br>time/s | time/h | time/s  | integration of<br>product peak | No. Hs in<br>environment | Integration of<br>SM peak | No. Hs in<br>environment | Conv  | [Alkyne]    | 1/[Alkyne] | Conv % |
|------------------|------------------|--------------|--------------------|--------|---------|--------------------------------|--------------------------|---------------------------|--------------------------|-------|-------------|------------|--------|
|                  | 05/11/2018 17:09 |              |                    | 0      | 0       | 2                              | 3                        | 86.75                     | 3                        | 0.000 | 9.70E-05    | 10309      | 0.0    |
| 05/11/2018 17:09 | 06/11/2018 10:29 | 0:17:20:00   | 62400              | 17.3   | 62400   | 2                              | 3                        | 11.7                      | 3                        | 0.146 | 8.28394E-05 | 12072      | 14.6   |
| 06/11/2018 10:29 | 07/11/2018 10:01 | 0:23:32:00   | 84720              | 40.9   | 147120  | 2                              | 3                        | 5.37                      | 3                        | 0.271 | 7.06771E-05 | 14149      | 27.1   |
| 07/11/2018 10:01 | 08/11/2018 10:18 | 1:0:17:00    | 87420              | 65.2   | 234540  | 3                              | 3                        | 5.04                      | 3                        | 0.373 | 6.0806E-05  | 16446      | 37.3   |
| 08/11/2018 10:18 | 09/11/2018 10:44 | 1:0:26:00    | 87960              | 89.6   | 322500  | 3                              | 3                        | 3.5                       | 3                        | 0.462 | 5.22308E-05 | 19146      | 46.2   |
| 09/11/2018 10:44 | 12/11/2018 14:34 | 3:3:50:00    | 273000             | 165.4  | 595500  | 5.54                           | 3                        | 3                         | 3                        | 0.649 | 3.40749E-05 | 29347      | 64.9   |
| 12/11/2018 14:34 | 13/11/2018 10:26 | 0:19:52:00   | 71520              | 185.3  | 667020  | 3                              | 3                        | 1.46                      | 3                        | 0.673 | 3.17534E-05 | 31493      | 67.3   |
| 13/11/2018 10:26 | 14/11/2018 19:36 | 1:9:10:00    | 119400             | 218.4  | 786420  | 3                              | 3                        | 1.21                      | 3                        | 0.713 | 2.78789E-05 | 35869      | 71.3   |
| 14/11/2018 19:36 | 15/11/2018 10:30 | 0:14:54:00   | 53640              | 233.3  | 840060  | 10                             | 3                        | 3.83                      | 3                        | 0.723 | 2.68626E-05 | 37226      | 72.3   |
| 15/11/2018 10:30 | 16/11/2018 14:23 | 1:3:53:00    | 100380             | 261.2  | 940440  | 10                             | 3                        | 3.25                      | 3                        | 0.755 | 2.37925E-05 | 42030      | 75.5   |
| 16/11/2018 14:23 | 20/11/2018 11:36 | 3:21:13:00   | 335580             | 354.4  | 1276020 | 10                             | 3                        | 2.12                      | 3                        | 0.825 | 1.6967E-05  | 58938      | 82.5   |
| 20/11/2018 11:36 | 21/11/2018 13:34 | 1:1:58:00    | 93480              | 380.4  | 1369500 | 10                             | 3                        | 1.94                      | 3                        | 0.838 | 1.57605E-05 | 63450      | 83.8   |
| 21/11/2018 13:34 | 22/11/2018 13:16 | 0:23:42:00   | 85320              | 404.1  | 1454820 | 10                             | 3                        | 1.75                      | 3                        | 0.851 | 1.44468E-05 | 69219      | 85.1   |
| 22/11/2018 13:16 | 23/11/2018 11:09 | 0:21:53:00   | 78780              | 426.0  | 1533600 | 10                             | 3                        | 1.67                      | 3                        | 0.857 | 1.38809E-05 | 72041      | 85.7   |
| 23/11/2018 11:09 | 26/11/2018 13:42 | 3:2:33:00    | 268380             | 500.5  | 1801980 | 9.88                           | 3                        | 1.27                      | 3                        | 0.886 | 1.10484E-05 | 90511      | 88.6   |
| 26/11/2018 13:42 | 27/11/2018 14:09 | 1:0:27:00    | 88020              | 525.0  | 1890000 | 10                             | 3                        | 1.17                      | 3                        | 0.895 | 1.01603E-05 | 98423      | 89.5   |

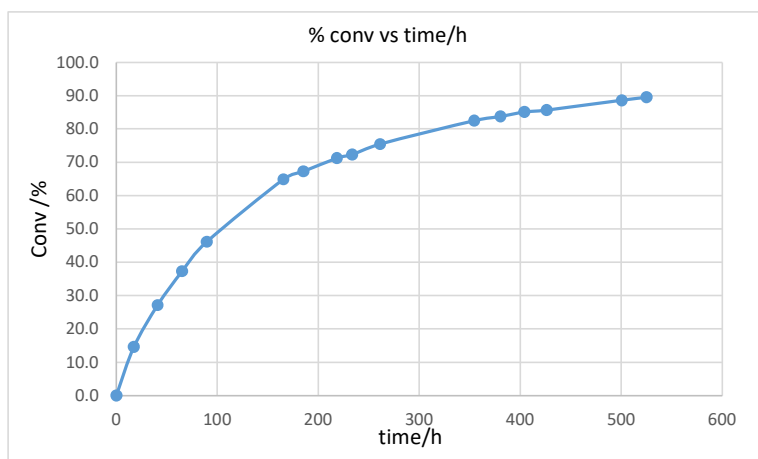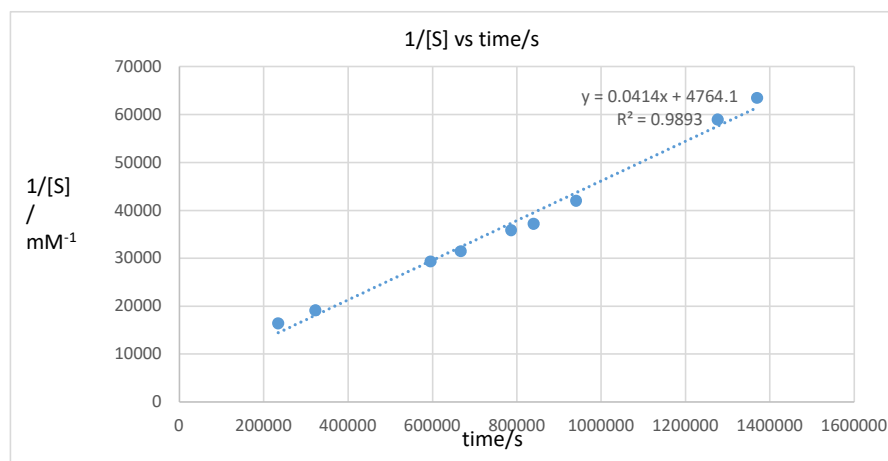

$$k = 0.041 \text{ mM}^{-1}\text{s}^{-1}$$

Reaction of compound **37** (DiOMe) with benzylazide in CDCl<sub>3</sub>.

Compound **37** (7.0 mg, 26 μmol) and BnN<sub>3</sub> (2.7 mg, 23 μmol) in CDCl<sub>3</sub> (0.5 mL, [alkyne](initial) = 47 mM).

\* [alkyne] is in M/1000 so that gradient of 1/[S] vs time/s is given as mM<sup>-1</sup>s<sup>-1</sup> instead of M<sup>-1</sup>s<sup>-1</sup>

| start date/time  | end of interval  | time elapsed | interval time/s | time/s | time/h | integration of product peak | No. Hs in environment | Integration of SM peak | No. Hs in environment | Conv  | [Alkyne] | 1/[Alkyne] | Conv/% |
|------------------|------------------|--------------|-----------------|--------|--------|-----------------------------|-----------------------|------------------------|-----------------------|-------|----------|------------|--------|
| 17/03/2020 09:30 | 17/03/2020 10:03 | 0:0:33:00    | 1980            | 1980   | 0.55   | 1                           | 1                     | 92.44                  | 2                     | 0.021 | 4.00E-05 | 25000      | 2.1    |
| 17/03/2020 10:03 | 17/03/2020 14:55 | 0:4:52:00    | 17520           | 19500  | 5.4    | 1                           | 1                     | 12.26                  | 2                     | 0.140 | 3.44E-05 | 29078      | 14.0   |
| 17/03/2020 14:55 | 18/03/2020 09:11 | 0:18:16:00   | 65760           | 85260  | 23.7   | 0.69                        | 1                     | 2                      | 2                     | 0.408 | 2.37E-05 | 42250      | 40.8   |
| 18/03/2020 09:11 | 18/03/2020 16:59 | 0:7:48:00    | 28080           | 113340 | 31.5   | 0.92                        | 1                     | 2                      | 2                     | 0.479 | 2.08E-05 | 48000      | 47.9   |
| 18/03/2020 16:59 | 19/03/2020 17:28 | 1:0:29:00    | 88140           | 201480 | 56.0   | 1.61                        | 1                     | 2                      | 2                     | 0.617 | 1.53E-05 | 65250      | 61.7   |
| 19/03/2020 17:28 | 20/03/2020 11:49 | 0:18:21:00   | 66060           | 267540 | 74.3   | 1.09                        | 1                     | 1                      | 2                     | 0.686 | 1.26E-05 | 79500      | 68.6   |
| 20/03/2020 11:49 | 23/03/2020 12:45 | 3:0:56:00    | 262560          | 530100 | 147.2  | 2.13                        | 1                     | 1                      | 2                     | 0.810 | 7.60E-06 | 131500     | 81.0   |
| 23/03/2020 12:45 | 24/03/2020 10:22 | 0:21:37:00   | 77820           | 607920 | 168.9  | 2.5                         | 1                     | 1                      | 2                     | 0.833 | 6.67E-06 | 150000     | 83.3   |

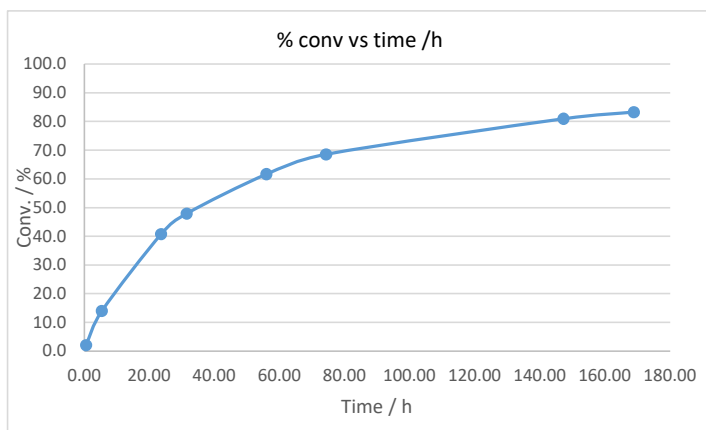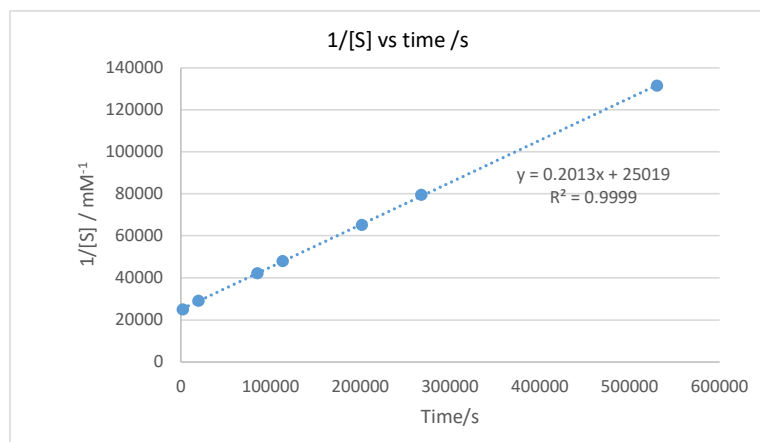

$k = 0.20 \text{ mM}^{-1}\text{s}^{-1}$

Reaction of compound **44** (C4 diether bridged) with benzylazide in  $\text{CDCl}_3$ .

Compound **44** (10 mg, 31  $\mu\text{mol}$ ) and  $\text{BnN}_3$  (4.0 mg, 30  $\mu\text{mol}$ ) in  $\text{CDCl}_3$  (0.6 mL,  $[\text{alkyne}]_{\text{initial}} = 51.7 \text{ mM}$ ).

\*  $[\text{alkyne}]$  is in M/1000 so that gradient of  $1/[\text{S}]$  vs time/s is given as  $\text{mM}^{-1}\text{s}^{-1}$  instead of  $\text{M}^{-1}\text{s}^{-1}$

| start date/time  | end of interval  | time elapsed | interval<br>time/s | time/s | time/h | integration of<br>product peak | No. Hs in<br>environment | Integration of<br>SM peak | No. Hs in<br>environment | Conv  | [Alkyne]  | 1/[Alkyne] | Conv % | time/s |
|------------------|------------------|--------------|--------------------|--------|--------|--------------------------------|--------------------------|---------------------------|--------------------------|-------|-----------|------------|--------|--------|
| 16/02/2021 13:55 | 16/02/2021 13:55 | 0:0:00:00    | 0                  | 0      | 0.0    | 0                              | 1                        | 4                         | 4                        | 0.000 | 5.170E-05 | 19342      | 0.00   | 0      |
| 16/02/2021 13:55 | 16/02/2021 16:41 | 0:2:46:00    | 9960               | 9960   | 2.8    | 0.72                           | 1                        | 4                         | 4                        | 0.419 | 3.006E-05 | 33269      | 41.86  | 9960   |
| 16/02/2021 16:41 | 17/02/2021 09:15 | 0:16:34:00   | 59640              | 69600  | 19.3   | 1                              | 1                        | 0.66                      | 4                        | 0.858 | 7.322E-06 | 136569     | 85.84  | 69600  |
| 17/02/2021 09:15 | 17/02/2021 15:13 | 0:5:58:00    | 21480              | 91080  | 25.3   | 1                              | 1                        | 0.49                      | 4                        | 0.891 | 5.642E-06 | 177239     | 89.09  | 91080  |
| 17/02/2021 15:13 | 18/02/2021 09:12 | 0:17:59:00   | 64740              | 155820 | 43.3   | 1                              | 1                        | 0.26                      | 4                        | 0.939 | 3.155E-06 | 316917     | 93.90  | 155820 |
| 18/02/2021 09:12 | 18/02/2021 15:11 | 0:5:59:00    | 21540              | 177360 | 49.3   | 1                              | 1                        | 0.21                      | 4                        | 0.950 | 2.579E-06 | 387768     | 95.01  | 177360 |
| 18/02/2021 15:11 | 19/02/2021 09:19 | 0:18:08:00   | 65280              | 242640 | 67.4   | 1                              | 1                        | 0.15                      | 4                        | 0.964 | 1.869E-06 | 535139     | 96.39  | 242640 |
| 19/02/2021 09:19 | 19/02/2021 15:11 | 0:5:52:00    | 21120              | 263760 | 73.3   | 8.32                           | 1                        | 1                         | 4                        | 0.971 | 1.508E-06 | 663056     | 97.08  | 263760 |
| 19/02/2021 15:11 | 20/02/2021 09:06 | 0:17:55:00   | 64500              | 328260 | 91.2   | 1                              | 1                        | 0.09                      | 4                        | 0.978 | 1.138E-06 | 879003     | 97.80  | 328260 |
| 20/02/2021 09:06 | 20/02/2021 15:06 | 0:6:00:00    | 21600              | 349860 | 97.2   | 1                              | 1                        | 0.08                      | 4                        | 0.980 | 1.014E-06 | 986460     | 98.04  | 349860 |
| 20/02/2021 15:06 | 21/02/2021 09:05 | 0:17:59:00   | 64740              | 414600 | 115.2  | 14.92                          | 1                        | 1                         | 4                        | 0.984 | 8.520E-07 | 1173694    | 98.35  | 414600 |
| 21/02/2021 09:05 | 21/02/2021 15:05 | 0:6:00:00    | 21600              | 436200 | 121.2  | 15.09                          | 1                        | 1                         | 4                        | 0.984 | 8.426E-07 | 1186847    | 98.37  | 436200 |
| 21/02/2021 15:05 | 22/02/2021 09:08 | 0:18:03:00   | 64980              | 501180 | 139.2  | 21.24                          | 1                        | 1                         | 4                        | 0.988 | 6.014E-07 | 1662669    | 98.84  | 501180 |
| 22/02/2021 09:08 | 22/02/2021 15:09 | 0:6:01:00    | 21660              | 522840 | 145.2  | 25.78                          | 1                        | 1                         | 4                        | 0.990 | 4.965E-07 | 2013926    | 99.04  | 522840 |
| 22/02/2021 15:09 | 23/02/2021 09:15 | 0:18:06:00   | 65160              | 588000 | 163.3  | 1                              | 1                        | 0.03                      | 4                        | 0.993 | 3.849E-07 | 2598324    | 99.26  | 588000 |
| 23/02/2021 09:15 | 23/02/2021 15:08 | 0:5:53:00    | 21180              | 609180 | 169.2  | 5                              | 1                        | 0.12                      | 4                        | 0.994 | 3.083E-07 | 3243069    | 99.40  | 609180 |

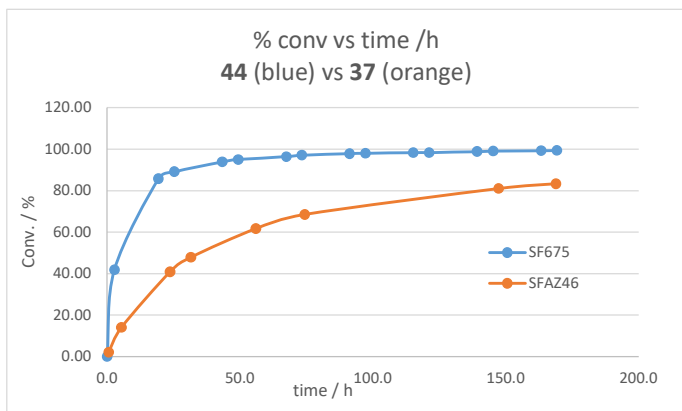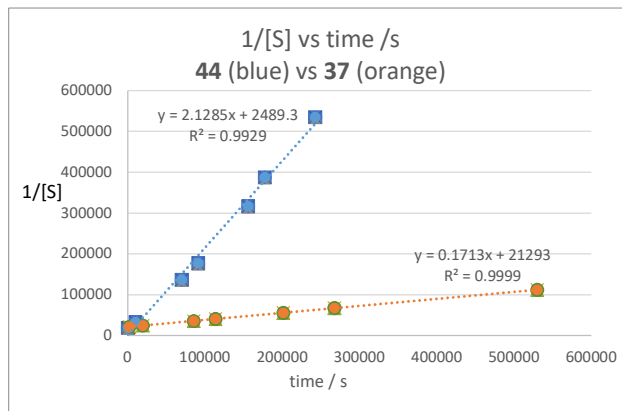

$$k = 2.13 \text{ mM}^{-1}\text{s}^{-1}$$

Compound **37** (SFAZ46) data for comparison

| time/s | time/h | 1/[Alkyne] | Conv % |
|--------|--------|------------|--------|
| 1980   | 0.55   | 21277      | 2.1    |
| 19500  | 5.42   | 24747      | 14.0   |
| 85260  | 23.68  | 35957      | 40.8   |
| 113340 | 31.48  | 40851      | 47.9   |
| 201480 | 55.97  | 55532      | 61.7   |
| 267540 | 74.32  | 67660      | 68.6   |
| 530100 | 147.25 | 111915     | 81.0   |
| 607920 | 168.87 | 127660     | 83.3   |

Reaction of compound **49** (diNitro) with benzylazide in CDCl<sub>3</sub>.

Compound **49** (9.0 mg, 27 μmol) and BnN<sub>3</sub> (3.6 mg, 27 μmol) in CDCl<sub>3</sub> (0.5 mL, [alkyne](initial) = 55 mM).

\* [alkyne] is in M/1000 so that gradient of 1/[S] vs time/s is given as mM<sup>-1</sup>s<sup>-1</sup> instead of M<sup>-1</sup>s<sup>-1</sup>

| start date/time  | end of interval  | time elapsed | interval<br>time/s | time/s | time/h | integration of<br>product peak | No. Hs in<br>environment | Integration<br>of SM peak | No. Hs in<br>environment | Conv  | [Alkyne]/M | 1/[Alkyne] | Conv/% | Time/s |
|------------------|------------------|--------------|--------------------|--------|--------|--------------------------------|--------------------------|---------------------------|--------------------------|-------|------------|------------|--------|--------|
| 17/05/2021 08:40 | 17/05/2021 09:07 | 0:0:27:00    | 1620               | 1620   | 0.45   | 1                              | 2                        | 20.66                     | 2                        | 0.046 | 5.50E-05   | 18182      | 4.62   | 1620   |
| 17/05/2021 09:07 | 17/05/2021 15:06 | 0:5:59:00    | 21540              | 21540  | 5.98   | 1                              | 2                        | 2.53                      | 2                        | 0.283 | 3.9419E-05 | 25368      | 28.33  | 21540  |
| 17/05/2021 15:06 | 18/05/2021 09:07 | 0:18:01:00   | 64860              | 86400  | 24.00  | 2                              | 2                        | 0.76                      | 2                        | 0.725 | 1.5145E-05 | 66029      | 72.46  | 86400  |
| 18/05/2021 09:07 | 18/05/2021 15:07 | 0:6:00:00    | 21600              | 108000 | 30.00  | 3.78                           | 2                        | 1                         | 2                        | 0.791 | 1.1506E-05 | 86909      | 79.08  | 108000 |
| 18/05/2021 15:07 | 19/05/2021 09:06 | 0:17:59:00   | 64740              | 172740 | 47.98  | 11.07                          | 2                        | 1                         | 2                        | 0.917 | 4.5568E-06 | 219455     | 91.71  | 172740 |
| 19/05/2021 09:06 | 19/05/2021 15:05 | 0:5:59:00    | 21540              | 194280 | 53.97  | 20.28                          | 2                        | 1                         | 2                        | 0.953 | 2.5846E-06 | 386909     | 95.30  | 194280 |
| 19/05/2021 15:05 | 20/05/2021 09:05 | 0:18:00:00   | 64800              | 259080 | 71.97  | 3                              | 2                        | 0.06                      | 2                        | 0.980 | 1.0784E-06 | 927273     | 98.04  | 259080 |
| 20/05/2021 09:05 | 20/05/2021 15:03 | 0:5:58:00    | 21480              | 280560 | 77.93  | 3                              | 2                        | 0.05                      | 2                        | 0.984 | 9.0164E-07 | 1109091    | 98.36  | 280560 |
| 20/05/2021 15:03 | 21/05/2021 08:22 | 0:17:19:00   | 62340              | 342900 | 95.25  | 3                              | 2                        | 0                         | 2                        | 1     | 0          | #DIV/0!    | 100    | 342900 |
| 21/05/2021 08:22 | 21/05/2021 20:27 | 0:12:05:00   | 43500              | 386400 | 107.33 | 3                              | 2                        | 0                         | 2                        | 1     | 0          | #DIV/0!    | 100    | 386400 |
| 21/05/2021 20:27 | 22/05/2021 08:20 | 0:11:53:00   | 42780              | 429180 | 119.22 | 3                              | 2                        | 0                         | 2                        | 1     | 0          | #DIV/0!    | 100    | 429180 |
| 22/05/2021 08:20 | 22/05/2021 20:20 | 0:12:00:00   | 43200              | 472380 | 131.22 | 3                              | 2                        | 0                         | 2                        | 1     | 0          | #DIV/0!    | 100    | 472380 |
| 22/05/2021 20:20 | 23/05/2021 08:22 | 0:12:02:00   | 43320              | 515700 | 143.25 | 3                              | 2                        | 0                         | 2                        | 1     | 0          | #DIV/0!    | 100    | 515700 |
| 23/05/2021 08:22 | 23/05/2021 20:21 | 0:11:59:00   | 43140              | 558840 | 155.23 | 3                              | 2                        | 0                         | 2                        | 1     | 0          | #DIV/0!    | 100    | 558840 |
| 23/05/2021 20:21 | 24/05/2021 09:06 | 0:12:45:00   | 45900              | 604740 | 167.98 | 3                              | 2                        | 0                         | 2                        | 1     | 0          | #DIV/0!    | 100    | 604740 |

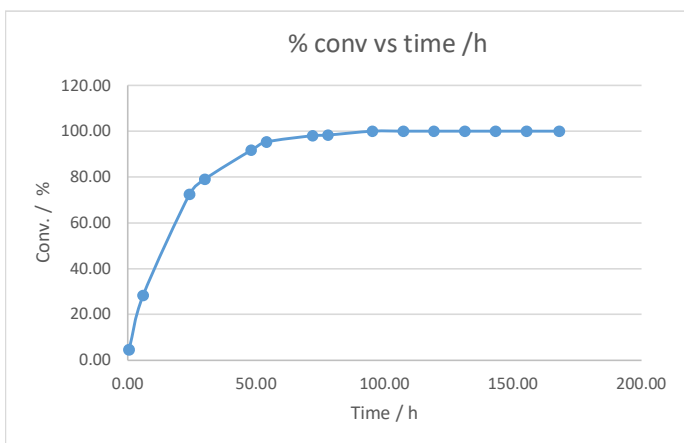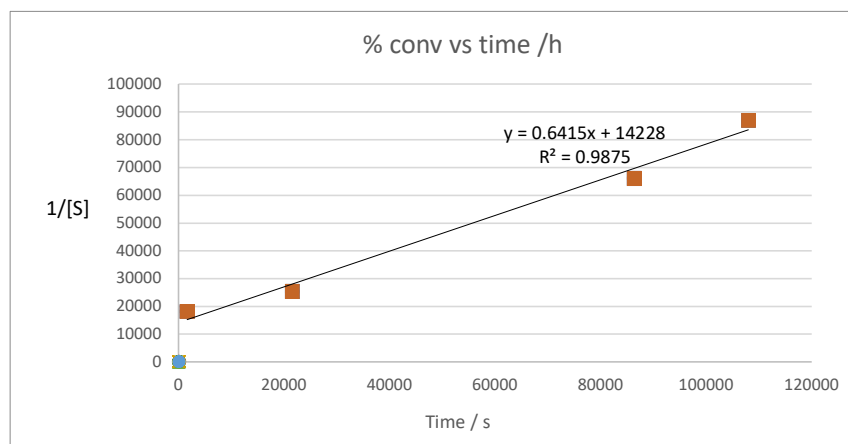

$k = 0.64 \text{ mM}^{-1}\text{s}^{-1}$



Reaction of compound **50** (diamine) with benzylazide in  $\text{CDCl}_3$ .

Compound **50** (3.0 mg, 11  $\mu\text{mol}$ ) and  $\text{BnN}_3$  (1.5 mg, 11  $\mu\text{mol}$ ) in  $\text{CDCl}_3$  (0.65 mL,  $[\text{alkyne}]_{\text{initial}} = 17 \text{ mM}$ ).

\*  $[\text{alkyne}]$  is in  $\text{M}/1000$  so that gradient of  $1/[\text{S}]$  vs time/s is given as  $\text{mM}^{-1}\text{s}^{-1}$  instead of  $\text{M}^{-1}\text{s}^{-1}$

| start date/time  | end of interval  | time elapsed | interval<br>time/s | time/s | time/h | integration of<br>product peak | No. Hs in<br>environment | Integration of<br>SM peak | No. Hs in<br>environment | Conv  | [Alkyne] | 1/[Alkyne] | conv/% | time/s |
|------------------|------------------|--------------|--------------------|--------|--------|--------------------------------|--------------------------|---------------------------|--------------------------|-------|----------|------------|--------|--------|
| 20/07/2021 10:25 | 20/07/2021 11:09 | 0:04:44:00   | 2640               | 2640   | 0.73   | 0                              | 1                        | 0.1                       | 4                        | 0.000 | 1.70E-05 | 58824      | 0      | 2640   |
| 20/07/2021 11:09 | 20/07/2021 15:30 | 0:42:21:00   | 15660              | 15660  | 4.35   | 0.03                           | 1                        | 1                         | 2                        | 0.057 | 1.60E-05 | 62353      | 5.7    | 15660  |
| 20/07/2021 15:30 | 21/07/2021 09:47 | 0:18:17:00   | 65820              | 81480  | 22.63  | 0.22                           | 1                        | 1                         | 2                        | 0.306 | 1.18E-05 | 84706      | 30.6   | 81480  |
| 21/07/2021 09:47 | 21/07/2021 13:48 | 0:4:01:00    | 14460              | 95940  | 26.65  | 0.25                           | 1                        | 1                         | 2                        | 0.333 | 1.13E-05 | 88235      | 33.3   | 95940  |
| 21/07/2021 13:48 | 22/07/2021 09:45 | 0:19:57:00   | 71820              | 167760 | 46.60  | 1.08                           | 1                        | 2.39                      | 2                        | 0.475 | 8.93E-06 | 111986     | 47.5   | 167760 |
| 22/07/2021 09:45 | 23/07/2021 10:47 | 1:1:02:00    | 90120              | 257880 | 71.63  | 1.75                           | 1                        | 2                         | 2                        | 0.636 | 6.18E-06 | 161765     | 63.6   | 257880 |
| 23/07/2021 10:47 | 24/07/2021 12:52 | 1:2:05:00    | 93900              | 351780 | 97.72  | 3.04                           | 1                        | 2                         | 2                        | 0.752 | 4.21E-06 | 237647     | 75.2   | 351780 |
| 24/07/2021 12:52 | 25/07/2021 15:40 | 1:2:48:00    | 96480              | 448260 | 124.52 | 2.39                           | 1                        | 1                         | 2                        | 0.827 | 2.94E-06 | 340000     | 82.7   | 448260 |
| 25/07/2021 15:40 | 26/07/2021 12:52 | 0:21:12:00   | 76320              | 524580 | 145.72 | 3.31                           | 1                        | 1                         | 2                        | 0.869 | 2.23E-06 | 448235     | 86.9   | 524580 |
| 26/07/2021 12:52 | 26/07/2021 16:31 | 0:3:39:00    | 13140              | 537720 | 149.37 | 3.76                           | 1                        | 1                         | 2                        | 0.883 | 2.00E-06 | 501176     | 88.3   | 537720 |
| 26/07/2021 16:31 | 27/07/2021 10:35 | 0:18:04:00   | 65040              | 602760 | 167.43 | 4.04                           | 1                        | 1                         | 2                        | 0.890 | 1.87E-06 | 534118     | 89.0   | 602760 |

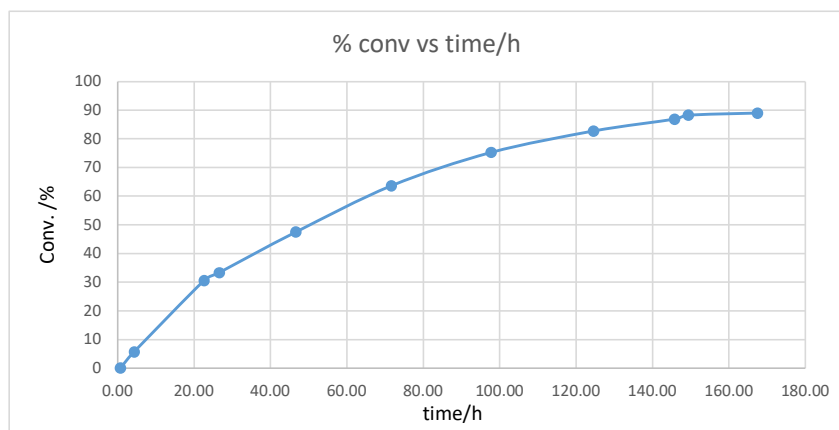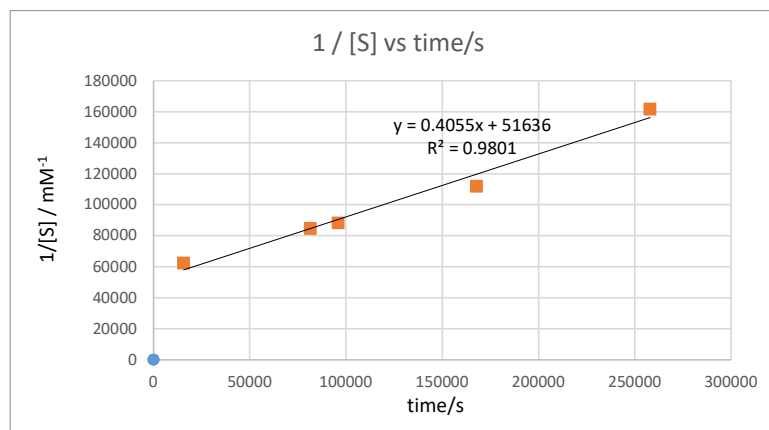

$k = 0.40 \text{ mM}^{-1}\text{s}^{-1}$

Reaction of compound **51** (diNTs) with benzylazide in  $\text{CDCl}_3$ .

Compound **51** (28.8 mg, 50  $\mu\text{mol}$ ) and  $\text{BnN}_3$  (6.6 mg, 50  $\mu\text{mol}$ ) in  $\text{CDCl}_3$  (0.5 mL,  $[\text{alkyne}]_{\text{initial}} = 100 \text{ mM}$ ).

\*  $[\text{alkyne}]$  is in M/1000 so that gradient of  $1/[\text{S}]$  vs time/s is given as  $\text{mM}^{-1} \text{ s}^{-1}$  instead of  $\text{M}^{-1} \text{ s}^{-1}$

| start date/time  | end of interval  | time elapsed interval/s | time interval/s | total time elapsed/s | Time /h | integration of product peak | No. Hs in environm ent | Integration of SM peak | No. Hs in environm ent | Conv  | [Alkyne] | 1/[Alkyne] | Conv /% | Time / s |
|------------------|------------------|-------------------------|-----------------|----------------------|---------|-----------------------------|------------------------|------------------------|------------------------|-------|----------|------------|---------|----------|
| 21/07/2021 13:35 | 21/07/2021 13:41 | 0:0:06:00               | 360.00          | 360                  | 0.10    | 0                           | 1                      | 1.00                   | 4                      | 0.000 | 1.00E-04 | 10000      | 0.0     | 360      |
| 21/07/2021 13:41 | 21/07/2021 14:39 | 0:0:58:00               | 3480.00         | 3480                 | 0.97    | 0.02                        | 1                      | 4.00                   | 4                      | 0.020 | 9.80E-05 | 10200      | 2.0     | 3480     |
| 21/07/2021 14:39 | 22/07/2021 09:46 | 0:19:07:00              | 68820.00        | 72300                | 20.08   | 0.68                        | 1                      | 4.00                   | 4                      | 0.405 | 5.95E-05 | 16800      | 40.5    | 72300    |
| 22/07/2021 09:46 | 23/07/2021 10:13 | 1:0:27:00               | 88020.00        | 160320               | 44.53   | 1                           | 1                      | 2.51                   | 4                      | 0.614 | 3.86E-05 | 25936      | 61.4    | 160320   |
| 23/07/2021 10:13 | 24/07/2021 12:51 | 1:2:38:00               | 95880.00        | 256200               | 71.17   | 1                           | 1                      | 1.40                   | 4                      | 0.741 | 2.59E-05 | 38571      | 74.1    | 256200   |
| 24/07/2021 12:51 | 25/07/2021 16:40 | 1:3:49:00               | 100140.00       | 356340               | 98.98   | 1.23                        | 1                      | 1.00                   | 4                      | 0.831 | 1.69E-05 | 59200      | 83.1    | 356340   |
| 25/07/2021 16:40 | 26/07/2021 10:46 | 0:18:06:00              | 65160.00        | 421500               | 117.08  | 1.76                        | 1                      | 1.00                   | 4                      | 0.876 | 1.24E-05 | 80400      | 87.6    | 421500   |
| 26/07/2021 10:46 | 26/07/2021 16:26 | 0:5:40:00               | 20400.00        | 441900               | 122.75  | 1                           | 1                      | 0.51                   | 4                      | 0.887 | 1.13E-05 | 88431      | 88.7    | 441900   |
| 26/07/2021 16:26 | 27/07/2021 10:30 | 0:18:04:00              | 65040.00        | 506940               | 140.82  | 3.49                        | 1                      | 1.00                   | 4                      | 0.933 | 6.68E-06 | 149600     | 93.3    | 506940   |

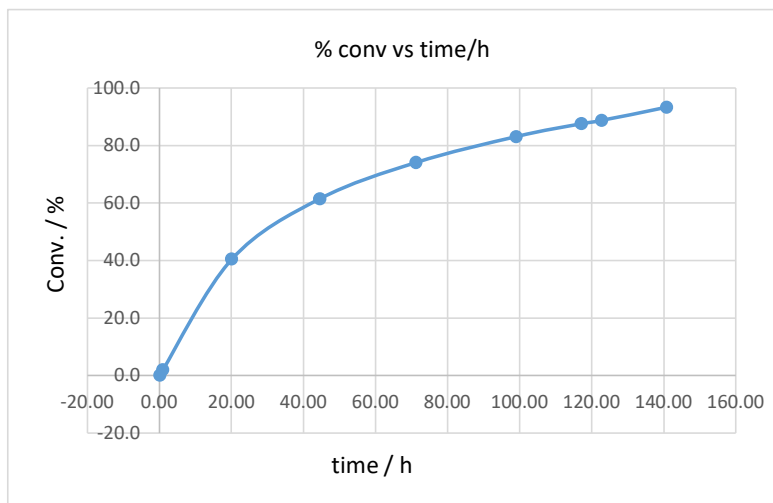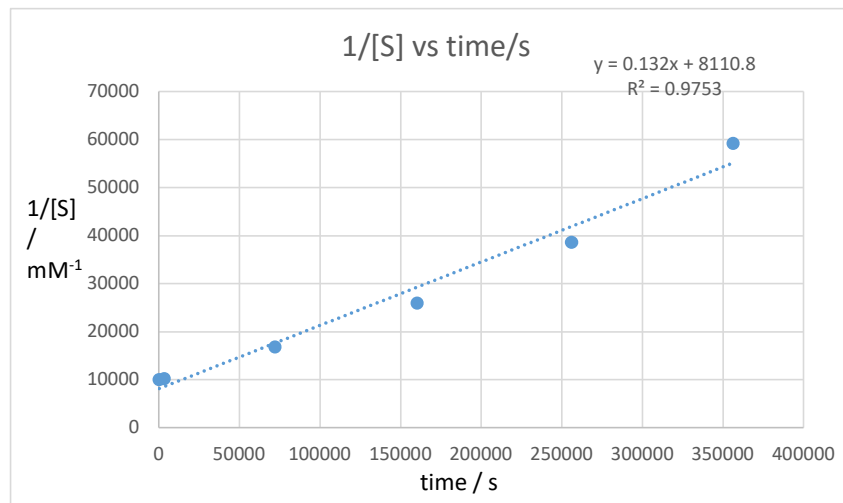

$k = 0.13 \text{ mM}^{-1} \text{ s}^{-1}$

Reaction of compound **53** (diMs) with benzylazide in CDCl<sub>3</sub>.

Compound **53** (10 mg, 24 μmol) and BnN<sub>3</sub> (3.1 mg, 24 μmol) in CDCl<sub>3</sub> (0.5 mL, [alkyne](initial) = 48 mM).

| time /s | SM peak<br>no Hs | Product<br>integral (2H) | SM peak<br>normalised | P peak<br>normalised | Conv.  | Conv/% | 1-conv | [Alkyne] | 1/[Alkyne] | [Alkyne]<br>]t0 | [alkyne] | 1/[alkyne] |
|---------|------------------|--------------------------|-----------------------|----------------------|--------|--------|--------|----------|------------|-----------------|----------|------------|
| 0       | 4                | 0.000                    | 1                     | 0.000                | 0.0000 | 0.0    | 1.000  | 0.0474   | 21.10      | 0.0474          | 0.0000   | #DIV/0!    |
| 9360    | 4                | 0.109                    | 1                     | 0.054                | 0.0515 | 5.1    | 0.949  | 0.0450   | 22.24      |                 | 0.0023   | 432.28     |
| 87300   | 4                | 0.810                    | 1                     | 0.405                | 0.2883 | 28.8   | 0.712  | 0.0337   | 29.65      |                 | 0.0097   | 102.83     |
| 162360  | 4                | 1.736                    | 1                     | 0.868                | 0.4646 | 46.5   | 0.535  | 0.0254   | 39.41      |                 | 0.0118   | 84.82      |
| 246780  | 4                | 3.308                    | 1                     | 1.654                | 0.6232 | 62.3   | 0.377  | 0.0179   | 55.99      |                 | 0.0111   | 89.85      |

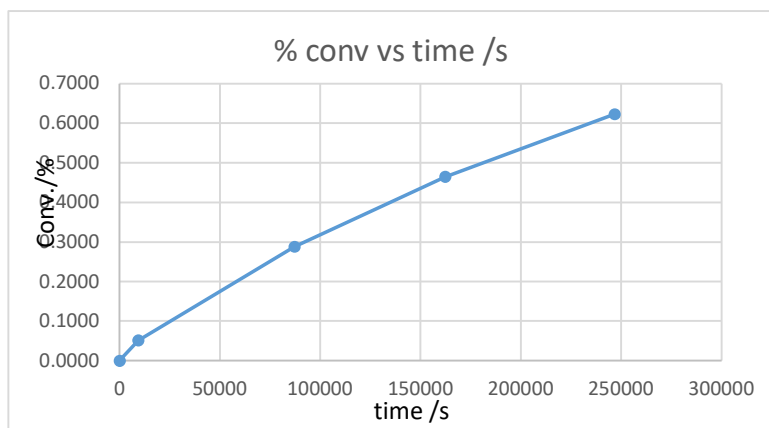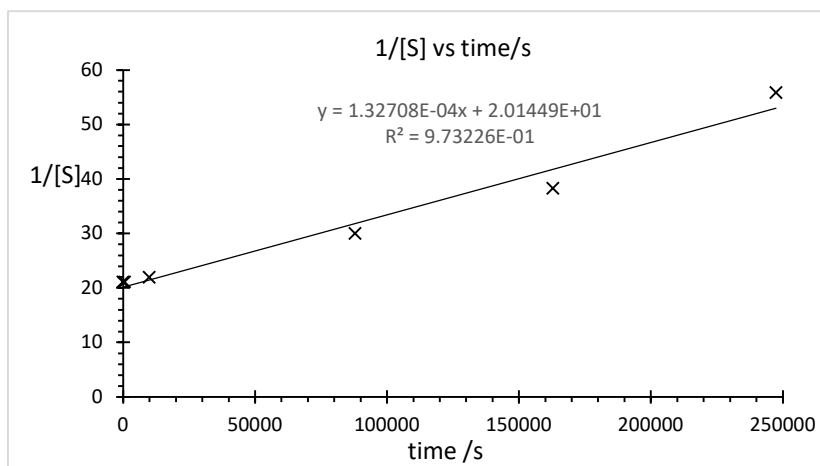

$$k = 0.13 \text{ mM}^{-1}\text{s}^{-1}$$

Reaction of compound **54** (diTs4C) with benzylazide in  $\text{CDCl}_3$ .

Compound **54** (12.6 mg, 20  $\mu\text{mol}$ ) and  $\text{BnN}_3$  (2.7 mg, 20  $\mu\text{mol}$ ) in  $\text{CDCl}_3$  (0.5 mL,  $[\text{alkyne}](\text{initial}) = 40 \text{ mM}$ ).

| start date/time  | end of interval  | interval time | interval time/s | interval time/s | interval time/h | integration of product peak | No. Hs in environment | Integration of SM peak | No. Hs in environment | Conv  | [Alkyne]/mM | 1/[Alkyne] | Conv/% | time/s |
|------------------|------------------|---------------|-----------------|-----------------|-----------------|-----------------------------|-----------------------|------------------------|-----------------------|-------|-------------|------------|--------|--------|
| 02/08/2021 13:52 | 02/08/2021 13:52 | 0:0:00:00     | 0               | 0               | 0.000           | 0                           | 1                     | 2.08                   | 4                     | 0.000 | 4.00E-05    | 25000      | 0.00   | 0      |
| 02/08/2021 13:52 | 02/08/2021 14:27 | 0:0:35:00     | 2100            | 2100            | 0.583           | 1                           | 1                     | 2.08                   | 4                     | 0.658 | 1.37E-05    | 7.31E+04   | 65.79  | 2100   |
| 02/08/2021 14:27 | 02/08/2021 15:38 | 0:1:11:00     | 4260            | 6360            | 1.767           | 1                           | 1                     | 0.44                   | 4                     | 0.901 | 3.96E-06    | 2.52E+05   | 90.09  | 6360   |
| 02/08/2021 15:38 | 02/08/2021 23:20 | 0:7:42:00     | 27720           | 34080           | 9.467           | 1                           | 1                     | 0.05                   | 4                     | 0.988 | 4.94E-07    | 2.03E+06   | 98.77  | 34080  |

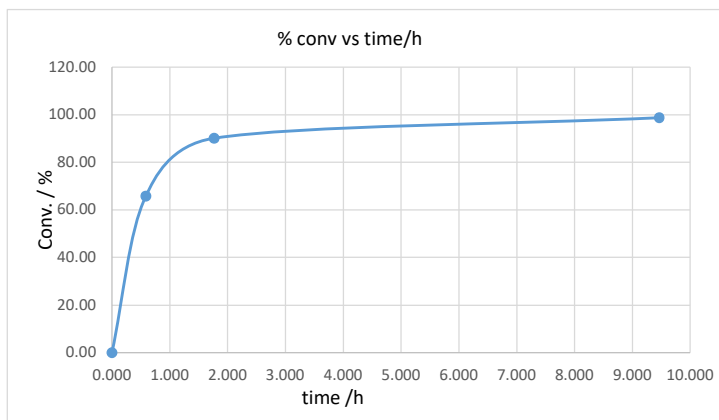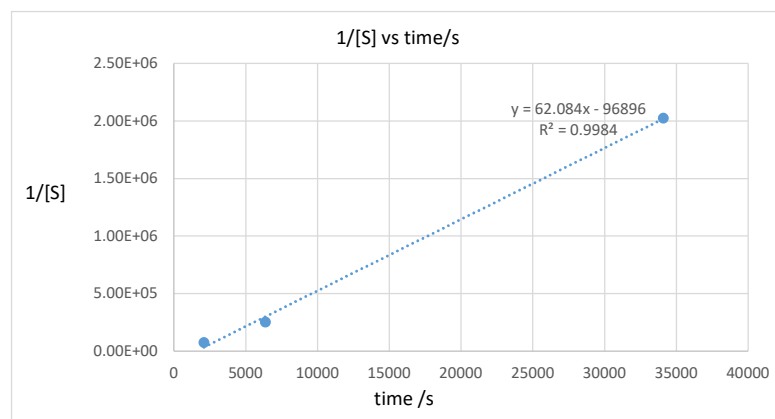

$$k = 62.1 \text{ mM}^{-1}\text{s}^{-1}$$

Reaction of compound **54** (diTs4C small scale) with benzylazide in  $\text{CDCl}_3$ .

Compound **54** (1.2 mg, 2  $\mu\text{mol}$ ) and  $\text{BnN}_3$  (0.3 mg, 2  $\mu\text{mol}$ ) in  $\text{CDCl}_3$  (0.5 mL),  $[\text{alkyne}]_{\text{initial}} = 4 \text{ mM}$ .

| start date/time  | end of interval  | interval time | interval time/s | time/s | time/h | integration of product peak | No. Hs in environment | Integratio   |                       | Conv  | [Alkyne] | 1/[Alkyne] | Conv/% | tme/s |
|------------------|------------------|---------------|-----------------|--------|--------|-----------------------------|-----------------------|--------------|-----------------------|-------|----------|------------|--------|-------|
|                  |                  |               |                 |        |        |                             |                       | n of SM peak | No. Hs in environment |       |          |            |        |       |
| 06/11/2021 09:03 | 06/11/2021 09:14 | 0:0:11:00     | 660             | 660    | 0.183  | 0.05                        | 1                     | 4            | 4                     | 0.048 | 4.00E-03 | 250        | 4.76   | 660   |
| 06/11/2021 09:14 | 06/11/2021 09:44 | 0:0:30:00     | 1800            | 2460   | 0.683  | 0.26                        | 1                     | 4            | 4                     | 0.206 | 3.17E-03 | 3.15E+02   | 20.63  | 2460  |
| 06/11/2021 09:44 | 06/11/2021 10:14 | 0:0:30:00     | 1800            | 4260   | 1.183  | 0.46                        | 1                     | 4            | 4                     | 0.315 | 2.74E-03 | 3.65E+02   | 31.51  | 4260  |
| 06/11/2021 10:14 | 06/11/2021 10:44 | 0:0:30:00     | 1800            | 6060   | 1.683  | 0.72                        | 1                     | 4            | 4                     | 0.419 | 2.33E-03 | 4.30E+02   | 41.86  | 6060  |
| 06/11/2021 10:44 | 06/11/2021 11:14 | 0:0:30:00     | 1800            | 7860   | 2.183  | 0.96                        | 1                     | 4            | 4                     | 0.490 | 2.04E-03 | 4.90E+02   | 48.98  | 7860  |
| 06/11/2021 11:14 | 06/11/2021 11:44 | 0:0:30:00     | 1800            | 9660   | 2.683  | 1.27                        | 1                     | 4            | 4                     | 0.559 | 1.76E-03 | 5.68E+02   | 55.95  | 9660  |
| 06/11/2021 11:44 | 06/11/2021 12:14 | 0:0:30:00     | 1800            | 11460  | 3.183  | 1.63                        | 1                     | 4            | 4                     | 0.620 | 1.52E-03 | 6.58E+02   | 61.98  | 11460 |
| 06/11/2021 12:14 | 06/11/2021 12:44 | 0:0:30:00     | 1800            | 13260  | 3.683  | 1.92                        | 1                     | 4            | 4                     | 0.658 | 1.37E-03 | 7.30E+02   | 65.75  | 13260 |
| 06/11/2021 12:44 | 06/11/2021 13:14 | 0:0:30:00     | 1800            | 15060  | 4.183  | 2.32                        | 1                     | 4            | 4                     | 0.699 | 1.20E-03 | 8.30E+02   | 69.88  | 15060 |
| 06/11/2021 13:14 | 06/11/2021 13:44 | 0:0:30:00     | 1800            | 16860  | 4.683  | 2.69                        | 1                     | 4            | 4                     | 0.729 | 1.08E-03 | 9.23E+02   | 72.90  | 16860 |
| 06/11/2021 13:44 | 06/11/2021 14:14 | 0:0:30:00     | 1800            | 18660  | 5.183  | 3.17                        | 1                     | 4            | 4                     | 0.760 | 9.59E-04 | 1.04E+03   | 76.02  | 18660 |
| 06/11/2021 14:14 | 06/11/2021 14:44 | 0:0:30:00     | 1800            | 20460  | 5.683  | 3.75                        | 1                     | 4            | 4                     | 0.789 | 8.42E-04 | 1.19E+03   | 78.95  | 20460 |
| 06/11/2021 14:44 | 06/11/2021 15:14 | 0:0:30:00     | 1800            | 22260  | 6.183  | 4.07                        | 1                     | 4            | 4                     | 0.803 | 7.89E-04 | 1.27E+03   | 80.28  | 22260 |
| 06/11/2021 15:14 | 06/11/2021 15:44 | 0:0:30:00     | 1800            | 24060  | 6.683  | 4.47                        | 1                     | 4            | 4                     | 0.817 | 7.31E-04 | 1.37E+03   | 81.72  | 24060 |
| 06/11/2021 15:44 | 06/11/2021 16:14 | 0:0:30:00     | 1800            | 25860  | 7.183  | 5.37                        | 1                     | 4            | 4                     | 0.843 | 6.28E-04 | 1.59E+03   | 84.30  | 25860 |
| 06/11/2021 16:14 | 06/11/2021 16:44 | 0:0:30:00     | 1800            | 27660  | 7.683  | 5.74                        | 1                     | 4            | 4                     | 0.852 | 5.93E-04 | 1.69E+03   | 85.16  | 27660 |
| 06/11/2021 16:44 | 06/11/2021 17:14 | 0:0:30:00     | 1800            | 29460  | 8.183  | 6.35                        | 1                     | 4            | 4                     | 0.864 | 5.44E-04 | 1.84E+03   | 86.39  | 29460 |
| 06/11/2021 17:14 | 06/11/2021 17:44 | 0:0:30:00     | 1800            | 31260  | 8.683  | 7.31                        | 1                     | 4            | 4                     | 0.880 | 4.81E-04 | 2.08E+03   | 87.97  | 31260 |
| 06/11/2021 17:44 | 06/11/2021 18:14 | 0:0:30:00     | 1800            | 33060  | 9.183  | 7.94                        | 1                     | 4            | 4                     | 0.888 | 4.47E-04 | 2.24E+03   | 88.81  | 33060 |
| 06/11/2021 18:14 | 06/11/2021 18:44 | 0:0:30:00     | 1800            | 34860  | 9.683  | 8.81                        | 1                     | 4            | 4                     | 0.898 | 4.08E-04 | 2.45E+03   | 89.81  | 34860 |

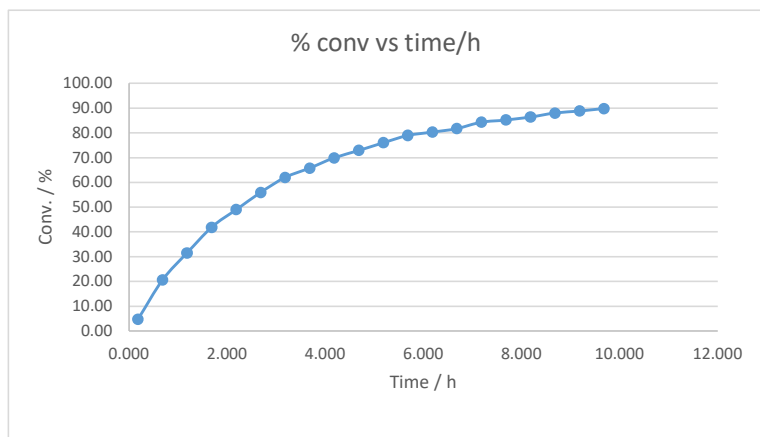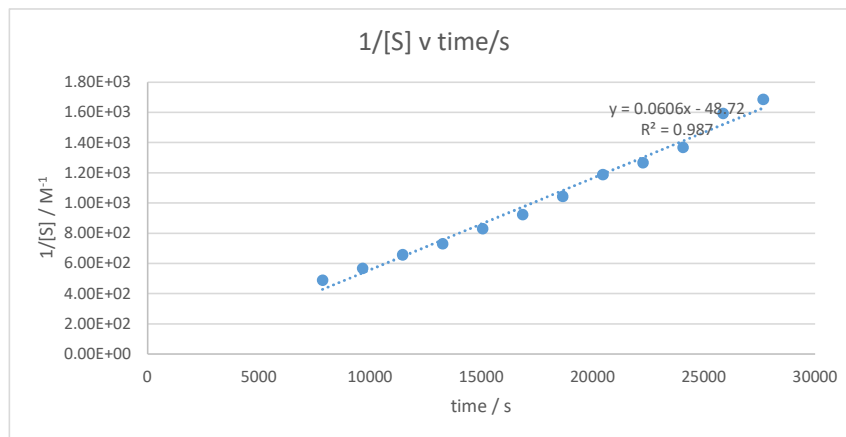

$$k = 60 \text{ mM}^{-1}\text{s}^{-1}$$

Reaction of compound **56** (diMs4C) with benzylazide in CDCl<sub>3</sub>.

Compound **56** (5.2 mg, 11 μmol) and BnN<sub>3</sub> (1.5 mg, 11 μmol) in CDCl<sub>3</sub> (0.5 mL), [alkyne](initial) = 22 mM.

| NMR | Time/s | Alkyne       |                                | Product CH2          |                                 | Conversion | [Alkyne] | 1/[Alkyne] | time  | Time step | Cumulative time/s | [Alkyne] <sub>0</sub> /M |
|-----|--------|--------------|--------------------------------|----------------------|---------------------------------|------------|----------|------------|-------|-----------|-------------------|--------------------------|
|     |        | CH2 integral | Alkyne CH2 integral normalised | Product CH2 integral | Product CH2 integral normalised |            |          |            |       |           |                   |                          |
| 0   | 0      | 100          | 25                             | 0.00                 | 0.00                            | 0.0000     | 0.02185  | 45.8       | 11:36 | 0         | 0                 | 0.0218                   |
| 1   | 420    | 100          | 25                             | 0.61                 | 0.31                            | 0.0121     | 0.02158  | 46.3       | 12:02 | 420       | 420               |                          |
| 2   | 540    | 100          | 25                             | 1.17                 | 0.59                            | 0.0230     | 0.02135  | 46.8       | 12:09 | 120       | 540               |                          |
| 3   | 660    | 100          | 25                             | 1.67                 | 0.83                            | 0.0322     | 0.02114  | 47.3       | 12:11 | 120       | 660               |                          |
| 4   | 2400   | 100          | 25                             | 7.12                 | 3.56                            | 0.1246     | 0.01913  | 52.3       | 12:13 | 120       | 2400              |                          |
| 5   | 2520   | 100          | 25                             | 7.70                 | 3.85                            | 0.1334     | 0.01893  | 52.8       | 12:42 | 1740      | 2400              |                          |
| 6   | 4620   | 100          | 25                             | 14.19                | 7.10                            | 0.2211     | 0.01702  | 58.8       | 12:44 | 120       | 2520              |                          |
| 7   | 4800   | 100          | 25                             | 14.72                | 7.36                            | 0.2275     | 0.01688  | 59.2       | 13:19 | 2100      | 4620              |                          |
| 8   | 6000   | 100          | 25                             | 18.85                | 9.43                            | 0.2738     | 0.01587  | 63.0       | 13:22 | 180       | 4800              |                          |
| 9   | 6120   | 100          | 25                             | 19.90                | 9.95                            | 0.2847     | 0.01563  | 64.0       | 13:42 | 1200      | 6000              |                          |
| 10  | 8460   | 100          | 25                             | 27.46                | 13.73                           | 0.3545     | 0.01410  | 70.9       | 13:44 | 120       | 6120              |                          |
| 11  | 12060  | 100          | 25                             | 40.01                | 20.00                           | 0.4445     | 0.01214  | 82.4       | 14:23 | 2340      | 8460              |                          |
| 12  | 16440  | 100          | 25                             | 56.52                | 28.26                           | 0.5306     | 0.01026  | 97.5       | 15:23 | 3600      | 12060             |                          |
| 13  | 21120  | 100          | 25                             | 74.08                | 37.04                           | 0.5970     | 0.00880  | 113.6      | 16:36 | 4380      | 16440             |                          |
| 14  | 27240  | 100          | 25                             | 100.33               | 50.16                           | 0.6674     | 0.00727  | 137.6      | 17:54 | 4680      | 21120             |                          |
| 15  | 32160  | 100          | 25                             | 121.66               | 60.83                           | 0.7087     | 0.00636  | 157.1      | 19:36 | 6120      | 27240             |                          |
| 16  | 32280  | 100          | 25                             | 124.35               | 62.18                           | 0.7132     | 0.00627  | 159.6      | 20:58 | 4920      | 32160             |                          |
| 17  | 41100  | 100          | 25                             | 166.40               | 83.20                           | 0.7690     | 0.00505  | 198.1      | 21:00 | 120       | 32280             |                          |
| 18  | 79500  | 100          | 25                             | 381.29               | 190.65                          | 0.8841     | 0.00253  | 394.8      | 23:27 | 8820      | 41100             |                          |
| 19  | 93900  | 100          | 25                             | 423.25               | 211.63                          | 0.8943     | 0.00231  | 433.2      | 10:07 | 38400     | 79500             |                          |
|     |        |              |                                |                      |                                 |            |          |            | 14:07 | 14400     | 93900             |                          |

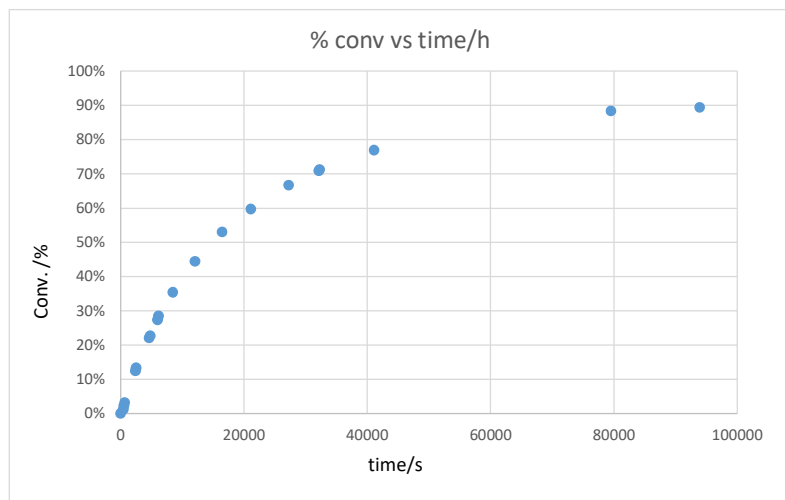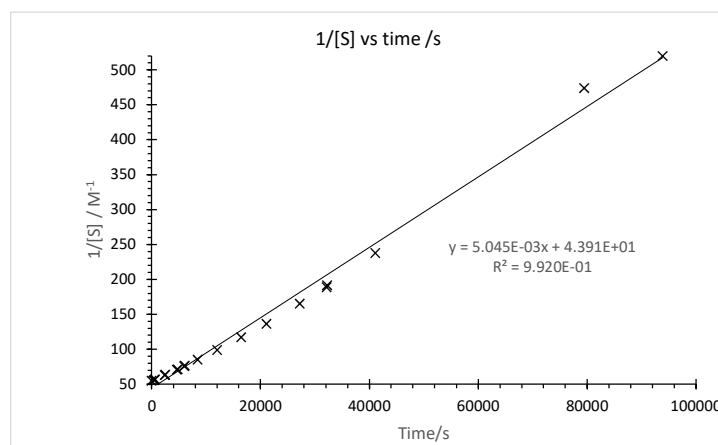

$k = 5.0 \text{ mM}^{-1}\text{s}^{-1}$

Reaction of compound **54** (diTs4C) with benzylazide in d6-DMSO.

Compound **54** (SF759) (3.5 mg, 5.6  $\mu\text{mol}$ ) and  $\text{BnN}_3$  (0.7 mg, 5.6  $\mu\text{mol}$ ) in d6-DMSO (0.5 mL) hence  $[\text{alkyne}](\text{initial}) = 11.2 \text{ mM}$ .

Azide added 20/22/23 12.00.

| Sample                                       | time  | SM 1H integral | Product 1H integral | t/min | Conv./% | t/s   | [S]/M   | 1/[S] /mM-1 |
|----------------------------------------------|-------|----------------|---------------------|-------|---------|-------|---------|-------------|
| Alkyne only                                  | 11.1  | 1              | 0                   | 0     | 0       | 0     | 0.01120 | 89.3        |
| PhCH <sub>2</sub> N <sub>3</sub> added 12.00 | 12.02 | 1              | 0.02                | 2     | 0       | 120   | 0.01120 | 89.3        |
| follow up 1 12:28                            | 12.35 | 0.59           | 0.36                | 35    | 38      | 2100  | 0.00694 | 144.0       |
| follow up 2 13:35                            | 13.41 | 0.41           | 0.51                | 101   | 55      | 6060  | 0.00504 | 198.4       |
| follow up 3 14:30                            | 14.54 | 0.33           | 0.61                | 174   | 65      | 10440 | 0.00392 | 255.1       |
| follow up 4 17:30                            | 17.42 | 0.25           | 0.67                | 342   | 72      | 20520 | 0.00314 | 318.9       |
| am on 21/11/23                               | 8.24  | 0.25           | 0.74                | 1224  | 75      | 73440 | 0.00280 | 357.1       |

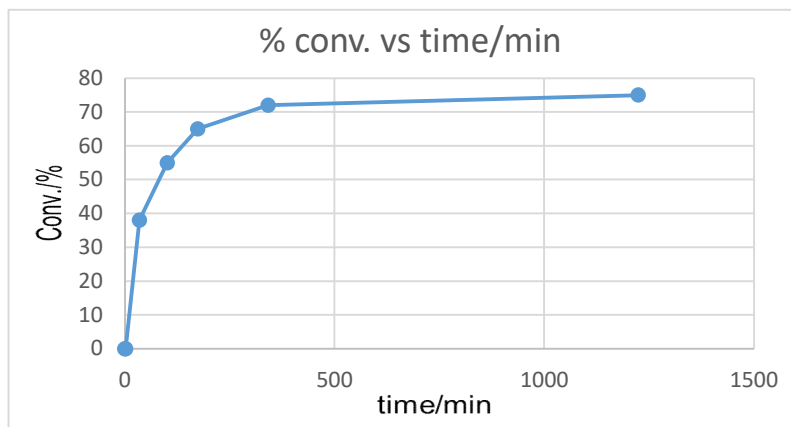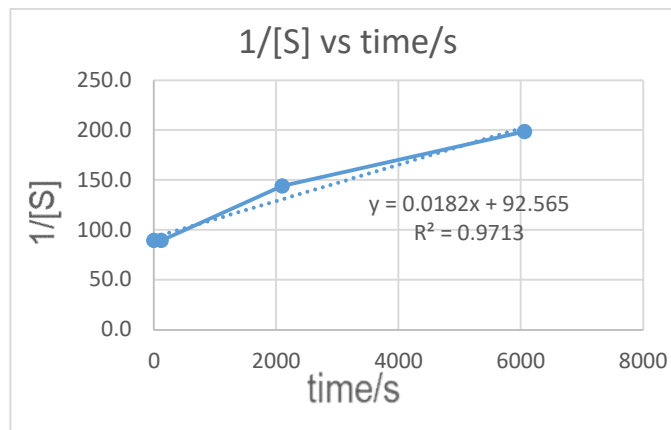

rate = 0.0182 M<sup>-1</sup> s<sup>-1</sup>  
18.3 mM<sup>-1</sup> s<sup>-1</sup>

Reaction of compound **56** (diMs4C) with benzylazide in d6-DMSO.

Compound **56** (AS31) (3.1 mg, 6.5  $\mu\text{mol}$ ) and  $\text{BnN}_3$  (0.86 mg, 6.5  $\mu\text{mol}$ , 9  $\mu\text{L}$ ) in d6-DMSO (0.5 mL) hence  $[\text{alkyne}](\text{initial}) = 13.0 \text{ mM}$ .

Azide added at 11.20.

| Sample              | time  | sm 1H integral | product 1H integral | t/min | % product | t/s   | [S]/M   | 1/[S]  |
|---------------------|-------|----------------|---------------------|-------|-----------|-------|---------|--------|
| alkyne only         | 11.03 | 1              | 0                   | 0     | 0         | 0     | 0.01300 | 76.9   |
| PhCH2N3 added 11.20 | 11.3  | 0.5            | 0.05                | 10    | 9         | 600   | 0.01183 | 84.5   |
| Follow up 1 11:34   | 11.38 | 0.5            | 0.13                | 18    | 21        | 1080  | 0.01027 | 97.4   |
| Follow up 2 12:39   | 13.06 | 0.5            | 0.56                | 106   | 53        | 6360  | 0.00611 | 163.7  |
| Follow up 3 14:19   | 14.23 | 0.5            | 0.9                 | 183   | 64        | 10980 | 0.00468 | 213.7  |
| Follow up 4 15:13   | 15.13 | 0.5            | 1.07                | 233   | 68        | 13980 | 0.00379 | 264.2  |
| Follow up 5 17:31   | 17.34 | 0.5            | 1.86                | 391   | 79        | 23460 | 0.00216 | 463.7  |
| Follow up 6 22:14   | 22.17 | 0.5            | 2.96                | 657   | 86        | 39420 | 0.00086 | 1169.0 |
| am 231123           | 8.45  | 0.5            | 9.9                 | 1285  | 95        | 77100 | 0.00023 | 4273.5 |

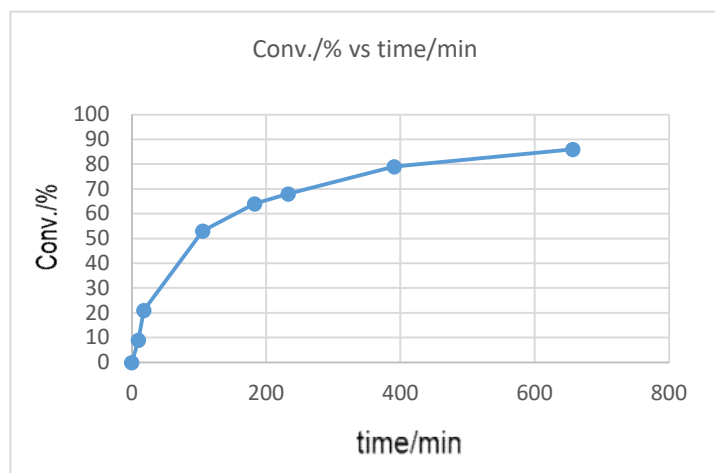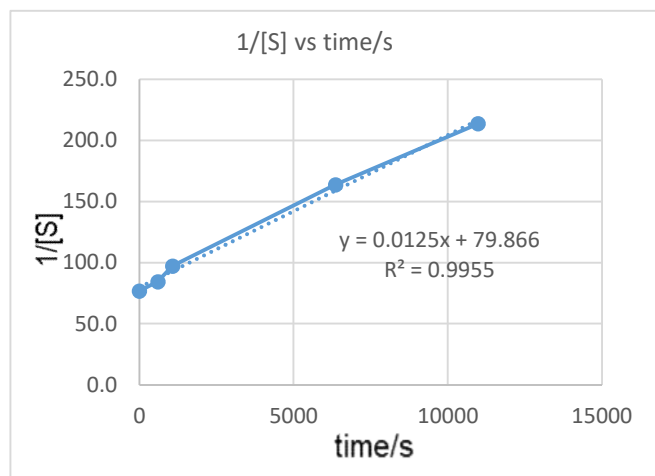

$$k = 12.5 \text{ mM}^{-1} \text{ s}^{-1}$$



Reaction of compound **54** (DiTsC4) with phenylazide in CDCl<sub>3</sub>.

SF759 (3.5 mg, 5.6 μmol) and PhN<sub>3</sub> (11.2 μL of a 0.5 M solution in tBuOMe, 5.6 μmol) in CDCl<sub>3</sub> (0.5 mL) [alkyne](initial) = 11.2 mM

The NMR spectra indicated that the PhN<sub>3</sub> was in excess, hence a second order rate constant cannot be generated.

|                         |         | time  | SM integral/<br>H | Product<br>integral/H | time/min | conv/% | t/s    | [S]/M   | 1/[S] |
|-------------------------|---------|-------|-------------------|-----------------------|----------|--------|--------|---------|-------|
| before PhN <sub>3</sub> | 400 10  | 11.05 | 1                 | 0                     |          |        |        |         |       |
| PhN <sub>3</sub> added  | 300 10  | 11.57 | 0.25              | 0.07                  | 0        | 22     | 0      | 0.01120 | 89    |
| follow up 1 12:26       | 400 30  | 12.31 | 0.25              | 0.42                  | 34       | 63     | 2040   | 0.00414 | 241   |
| follow up 2 13:36       | 400 60  | 13.44 | 0.11              | 1                     | 107      | 90     | 6420   | 0.00112 | 893   |
| follow up 3 14:30       | 400 80  | 14.51 | 0.025             | 1                     | 174      | 97     | 10440  | 0.00034 | 2976  |
| follow up 4 17:30       | 400 100 | 23.32 | 0.01              | 1                     | 690      | 99     | 41400  | 0.00011 | 8929  |
| 211123                  | 400 10  |       | 0                 | 1                     | 2400     | 100    | 144000 | 0       | n/a   |

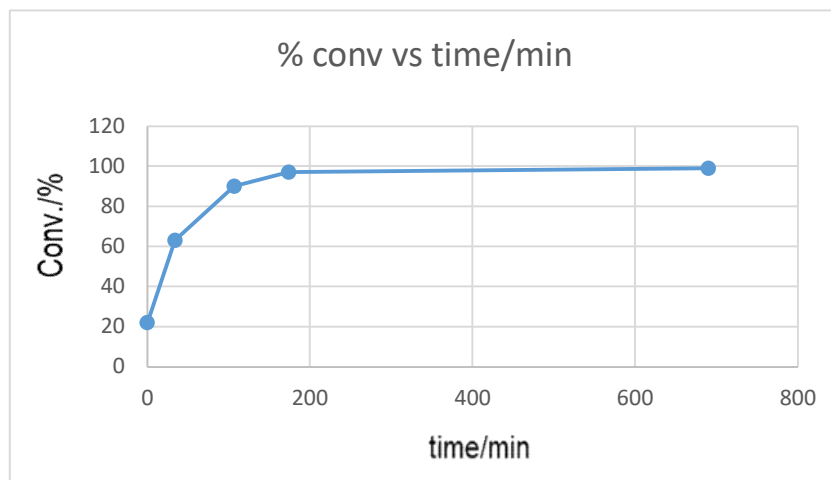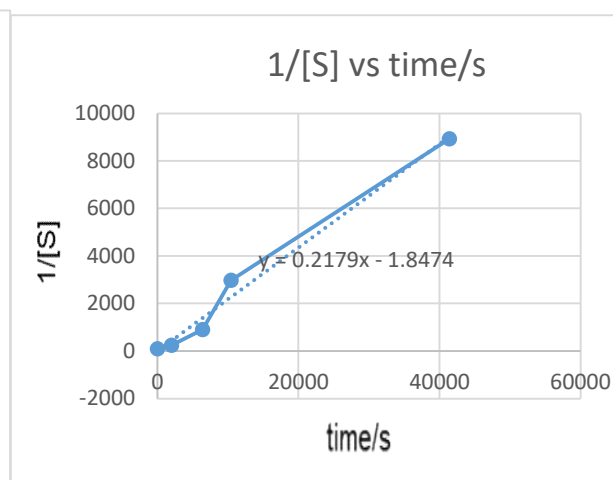

k = 0.22 M<sup>-1</sup> s<sup>-1</sup>  
inaccurate  
due to excess  
PhN<sub>3</sub>

Reaction of compound **56** (DiMsC4) with phenylazide in  $\text{CDCl}_3$ .

AS31 +  $\text{CDCl}_3$  +  $\text{PhN}_3$        $\text{PhN}_3$  concentration low at start and more added later.

Compound **56** (AS31) (4.0 mg, 8.4  $\mu\text{mol}$ ) and  $\text{PhN}_3$  (0.5 M solution in  $t\text{BuOMe}$ , 0.0084 mmol, 16.8  $\mu\text{L}$ ) in  $\text{CDCl}_3$  (0.5 mL) hence  $[\text{alkyne}](\text{initial}) = 16.8 \text{ mM}$ .

| 21 11 2023            | run     | time  | SM integral/H | Product in t/min | % product |    |                                 |
|-----------------------|---------|-------|---------------|------------------|-----------|----|---------------------------------|
| before $\text{PhN}_3$ | 400 30  | 8.48  | 1             | 0                | 0         |    |                                 |
| $\text{PhN}_3$ added  | 400 50  | 9.36  | 1             | 0                | 21        | 0  |                                 |
| 09:50                 | 400 70  | 9.55  | 0.25          | 0.01             | 40        | 4  |                                 |
| 10:55                 | 400 90  | 11    | 15.3          | 1                | 75        | 6  |                                 |
| 12:23                 | 400 110 | 12.28 | 0.25          | 0.03             | 191       | 10 | Additional $\text{PhN}_3$ added |
| 13:54                 | 400 130 | 14.12 | 0.25          | 0.06             | 297       | 19 |                                 |
| 15:51                 | 400 140 | 16.01 | 0.25          | 0.1              | 406       | 29 |                                 |
| 18:16                 | 400 150 | 19.45 | 0.25          | 0.17             | 630       | 40 |                                 |
| 22-Nov                | 400 10  | 8.28  | 0.25          | 0.4              | 1400      | 62 |                                 |

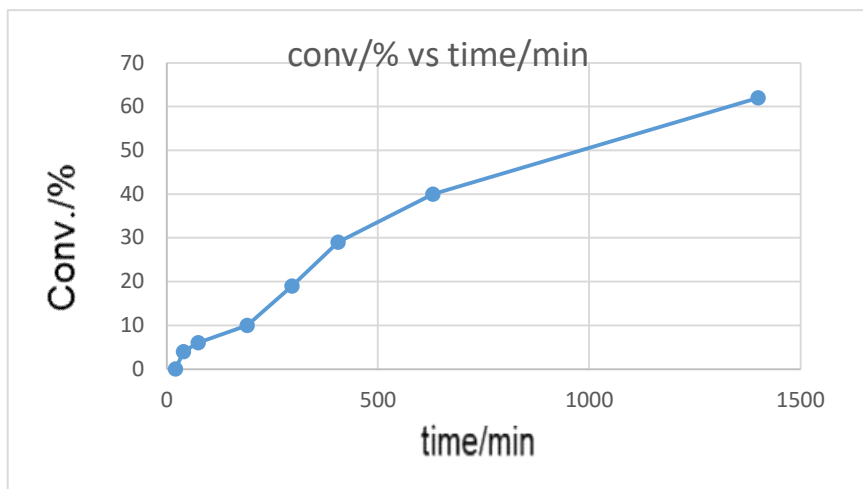

An accurate k value cannot be generated.
